# Supplementary material for: Investigating nicotine pathway-related long non-coding RNAs in tobacco
Source: Front Genet. 2023 Jan 19;13:1102183. doi: 10.3389/fgene.2022.1102183 (PMC9892058; doi:10.3389/fgene.2022.1102183)
Supplement: Supplementary file 6 [file Table11.XLSX]

## Sheet: Sheet1
Table S12: lincRNAs and co-expressed protein-coding genes involved in nicotine biosynthesis or transportation.
lncRNA_locus_id	coding_gene_id	PCC	coding_gene_annotation	bioprocess	MEyellow module
MSTRG.10031	Nitab4.5_0004816g0010	0.9813	Nicotinate-nucleotide pyrophosphorylase, Quinolinate phosphoribosyl transferase, C-terminal, Quinolinate phosphoribosyl transferase, N-terminal, Aldolase-type TIM barrel, Nicotinate-nucleotide pyrophosphorylase/Putative pyrophosphorylase ModD	nicotine biosynthesis
MSTRG.10032	Nitab4.5_0004816g0010	0.9774	Nicotinate-nucleotide pyrophosphorylase, Quinolinate phosphoribosyl transferase, C-terminal, Quinolinate phosphoribosyl transferase, N-terminal, Aldolase-type TIM barrel, Nicotinate-nucleotide pyrophosphorylase/Putative pyrophosphorylase ModD	nicotine biosynthesis
MSTRG.100491	Nitab4.5_0000013g0380	0.9468	Spermidine/spermine synthases family	nicotine biosynthesis
MSTRG.100491	Nitab4.5_0000013g0390	0.8769	Spermidine/spermine synthases family	nicotine biosynthesis
MSTRG.100491	Nitab4.5_0000025g0290	0.9528	Copper amine oxidase, C-terminal, Copper amine oxidase, N2-terminal, Copper amine oxidase, N3-terminal, Copper amine oxidase, N-terminal, Copper amine oxidase, N2/N3-terminal, Copper amine oxidase	nicotine biosynthesis
MSTRG.100491	Nitab4.5_0000031g0370	0.9674	NAD(P)-binding domain, NmrA-like	nicotine biosynthesis
MSTRG.100491	Nitab4.5_0000316g0090	0.9406	CO dehydrogenase flavoprotein-like, FAD-binding, subdomain 2, FAD-binding, type 2, Berberine/berberine-like, FAD-binding, type 2, subdomain 1, FAD linked oxidase, N-terminal	nicotine biosynthesis
MSTRG.100491	Nitab4.5_0000884g0010	0.9663	NmrA-like, NAD(P)-binding domain	nicotine biosynthesis
MSTRG.100491	Nitab4.5_0000983g0060	0.8561	Copper amine oxidase, Copper amine oxidase, N2/N3-terminal, Copper amine oxidase, N2-terminal, Copper amine oxidase, N3-terminal, Copper amine oxidase, C-terminal, Copper amine oxidase, N-terminal	nicotine biosynthesis
MSTRG.100491	Nitab4.5_0002338g0020	0.9679	FAD binding domain, L-aspartate oxidase, Fumarate reductase/succinate dehydrogenase flavoprotein-like, C-terminal, Succinate dehydrogenase/fumarate reductase flavoprotein, catalytic domain, FAD-dependent pyridine nucleotide-disulphide oxidoreductase	nicotine biosynthesis
MSTRG.100491	Nitab4.5_0002522g0070	0.8697	Fe-S metabolism associated domain, SufE-like, Quinolinate synthetase A	nicotine biosynthesis
MSTRG.100491	Nitab4.5_0003090g0030	0.9558	AP2/ERF domain, DNA-binding domain	nicotine biosynthesis
MSTRG.100491	Nitab4.5_0003284g0010	0.9201	Spermidine/spermine synthases family, Putrescine N-methyltransferase	nicotine biosynthesis
MSTRG.100491	Nitab4.5_0003284g0040	0.9318	Spermidine/spermine synthases family, Putrescine N-methyltransferase	nicotine biosynthesis
MSTRG.100491	Nitab4.5_0005830g0010	0.9522	Succinate dehydrogenase/fumarate reductase flavoprotein, catalytic domain, Fumarate reductase/succinate dehydrogenase flavoprotein-like, C-terminal, FAD binding domain, L-aspartate oxidase, FAD-dependent pyridine nucleotide-disulphide oxidoreductase	nicotine biosynthesis
MSTRG.100491	Nitab4.5_0006307g0010	0.969	CO dehydrogenase flavoprotein-like, FAD-binding, subdomain 2, FAD-binding, type 2, FAD-binding, type 2, subdomain 1, FAD linked oxidase, N-terminal, Berberine/berberine-like	nicotine biosynthesis
MSTRG.100491	Nitab4.5_0011232g0010	0.9637	Spermidine/spermine synthases family, Putrescine N-methyltransferase	nicotine biosynthesis
MSTRG.100491	Nitab4.5_0015055g0010	0.9676	DNA-binding domain, AP2/ERF domain	nicotine biosynthesis
MSTRG.100582	Nitab4.5_0000063g0120	0.8912	S-adenosylmethionine synthetase, conserved site, S-adenosylmethionine synthetase superfamily, S-adenosylmethionine synthetase, N-terminal, S-adenosylmethionine synthetase, S-adenosylmethionine synthetase, C-terminal, S-adenosylmethionine synthetase, central domain	nicotine biosynthesis	Yes
MSTRG.100582	Nitab4.5_0000745g0170	0.9135	S-adenosylmethionine synthetase, central domain, S-adenosylmethionine synthetase, S-adenosylmethionine synthetase, C-terminal, S-adenosylmethionine synthetase, conserved site, S-adenosylmethionine synthetase superfamily, S-adenosylmethionine synthetase, N-terminal	nicotine biosynthesis	Yes
MSTRG.100582	Nitab4.5_0001029g0080	0.9039	CO dehydrogenase flavoprotein-like, FAD-binding, subdomain 2, FAD linked oxidase, N-terminal, FAD-binding, type 2, subdomain 1, FAD-binding, type 2	nicotine biosynthesis	Yes
MSTRG.100582	Nitab4.5_0004665g0010	0.8636	S-adenosylmethionine synthetase, conserved site, S-adenosylmethionine synthetase, S-adenosylmethionine synthetase superfamily, S-adenosylmethionine synthetase, C-terminal, S-adenosylmethionine synthetase, central domain, S-adenosylmethionine synthetase, N-terminal	nicotine biosynthesis
MSTRG.100582	Nitab4.5_0008312g0060	0.8674	S-adenosylmethionine synthetase, conserved site, S-adenosylmethionine synthetase, S-adenosylmethionine synthetase, C-terminal, S-adenosylmethionine synthetase superfamily, S-adenosylmethionine synthetase, central domain, S-adenosylmethionine synthetase, N-terminal	nicotine biosynthesis
MSTRG.100654	Nitab4.5_0000316g0090	0.8706	CO dehydrogenase flavoprotein-like, FAD-binding, subdomain 2, FAD-binding, type 2, Berberine/berberine-like, FAD-binding, type 2, subdomain 1, FAD linked oxidase, N-terminal	nicotine biosynthesis
MSTRG.100940	Nitab4.5_0000013g0380	0.8684	Spermidine/spermine synthases family	nicotine biosynthesis	Yes
MSTRG.100940	Nitab4.5_0000013g0390	0.8814	Spermidine/spermine synthases family	nicotine biosynthesis
MSTRG.100940	Nitab4.5_0000025g0290	0.8719	Copper amine oxidase, C-terminal, Copper amine oxidase, N2-terminal, Copper amine oxidase, N3-terminal, Copper amine oxidase, N-terminal, Copper amine oxidase, N2/N3-terminal, Copper amine oxidase	nicotine biosynthesis	Yes
MSTRG.100940	Nitab4.5_0003090g0030	0.859	AP2/ERF domain, DNA-binding domain	nicotine biosynthesis	Yes
MSTRG.100940	Nitab4.5_0003284g0010	0.8758	Spermidine/spermine synthases family, Putrescine N-methyltransferase	nicotine biosynthesis	Yes
MSTRG.100940	Nitab4.5_0003284g0040	0.8549	Spermidine/spermine synthases family, Putrescine N-methyltransferase	nicotine biosynthesis	Yes
MSTRG.101134	Nitab4.5_0000316g0090	0.8638	CO dehydrogenase flavoprotein-like, FAD-binding, subdomain 2, FAD-binding, type 2, Berberine/berberine-like, FAD-binding, type 2, subdomain 1, FAD linked oxidase, N-terminal	nicotine biosynthesis	Yes
MSTRG.101134	Nitab4.5_0000745g0170	0.8535	S-adenosylmethionine synthetase, central domain, S-adenosylmethionine synthetase, S-adenosylmethionine synthetase, C-terminal, S-adenosylmethionine synthetase, conserved site, S-adenosylmethionine synthetase superfamily, S-adenosylmethionine synthetase, N-terminal	nicotine biosynthesis	Yes
MSTRG.101134	Nitab4.5_0004665g0010	0.875	S-adenosylmethionine synthetase, conserved site, S-adenosylmethionine synthetase, S-adenosylmethionine synthetase superfamily, S-adenosylmethionine synthetase, C-terminal, S-adenosylmethionine synthetase, central domain, S-adenosylmethionine synthetase, N-terminal	nicotine biosynthesis
MSTRG.101277	Nitab4.5_0000063g0120	0.9003	S-adenosylmethionine synthetase, conserved site, S-adenosylmethionine synthetase superfamily, S-adenosylmethionine synthetase, N-terminal, S-adenosylmethionine synthetase, S-adenosylmethionine synthetase, C-terminal, S-adenosylmethionine synthetase, central domain	nicotine biosynthesis
MSTRG.101277	Nitab4.5_0000745g0170	0.9232	S-adenosylmethionine synthetase, central domain, S-adenosylmethionine synthetase, S-adenosylmethionine synthetase, C-terminal, S-adenosylmethionine synthetase, conserved site, S-adenosylmethionine synthetase superfamily, S-adenosylmethionine synthetase, N-terminal	nicotine biosynthesis
MSTRG.101277	Nitab4.5_0001029g0080	0.8926	CO dehydrogenase flavoprotein-like, FAD-binding, subdomain 2, FAD linked oxidase, N-terminal, FAD-binding, type 2, subdomain 1, FAD-binding, type 2	nicotine biosynthesis
MSTRG.101403	Nitab4.5_0000063g0170	0.8564	similar to S-adenosylmethionine synthase 2	nicotine biosynthesis	Yes
MSTRG.101403	Nitab4.5_0001029g0080	0.8579	CO dehydrogenase flavoprotein-like, FAD-binding, subdomain 2, FAD linked oxidase, N-terminal, FAD-binding, type 2, subdomain 1, FAD-binding, type 2	nicotine biosynthesis	Yes
MSTRG.101573	Nitab4.5_0000063g0170	0.8511	similar to S-adenosylmethionine synthase 2	nicotine biosynthesis	Yes
MSTRG.101573	Nitab4.5_0001029g0080	0.9555	CO dehydrogenase flavoprotein-like, FAD-binding, subdomain 2, FAD linked oxidase, N-terminal, FAD-binding, type 2, subdomain 1, FAD-binding, type 2	nicotine biosynthesis	Yes
MSTRG.101608	Nitab4.5_0000003g0720	0.9395	Copper amine oxidase, N2-terminal, Copper amine oxidase, Copper amine oxidase, C-terminal, Copper amine oxidase, N-terminal, Copper amine oxidase, N2/N3-terminal, Copper amine oxidase, N3-terminal	nicotine biosynthesis
MSTRG.102024	Nitab4.5_0000742g0010	0.8846	Quinolinate phosphoribosyl transferase, C-terminal, Quinolinate phosphoribosyl transferase, N-terminal, Nicotinate-nucleotide pyrophosphorylase, Aldolase-type TIM barrel	nicotine biosynthesis
MSTRG.102024	Nitab4.5_0004816g0010	0.8826	Nicotinate-nucleotide pyrophosphorylase, Quinolinate phosphoribosyl transferase, C-terminal, Quinolinate phosphoribosyl transferase, N-terminal, Aldolase-type TIM barrel, Nicotinate-nucleotide pyrophosphorylase/Putative pyrophosphorylase ModD	nicotine biosynthesis
MSTRG.102210	Nitab4.5_0000031g0370	0.8749	NAD(P)-binding domain, NmrA-like	nicotine biosynthesis	Yes
MSTRG.102210	Nitab4.5_0000316g0090	0.9522	CO dehydrogenase flavoprotein-like, FAD-binding, subdomain 2, FAD-binding, type 2, Berberine/berberine-like, FAD-binding, type 2, subdomain 1, FAD linked oxidase, N-terminal	nicotine biosynthesis	Yes
MSTRG.102210	Nitab4.5_0000745g0170	0.9541	S-adenosylmethionine synthetase, central domain, S-adenosylmethionine synthetase, S-adenosylmethionine synthetase, C-terminal, S-adenosylmethionine synthetase, conserved site, S-adenosylmethionine synthetase superfamily, S-adenosylmethionine synthetase, N-terminal	nicotine biosynthesis	Yes
MSTRG.102210	Nitab4.5_0000884g0010	0.8768	NmrA-like, NAD(P)-binding domain	nicotine biosynthesis	Yes
MSTRG.102210	Nitab4.5_0001029g0080	0.9439	CO dehydrogenase flavoprotein-like, FAD-binding, subdomain 2, FAD linked oxidase, N-terminal, FAD-binding, type 2, subdomain 1, FAD-binding, type 2	nicotine biosynthesis	Yes
MSTRG.102210	Nitab4.5_0001965g0070	0.8837	S-adenosylmethionine decarboxylase, S-adenosylmethionine decarboxylase, conserved site, S-adenosylmethionine decarboxylase subgroup, S-adenosyl-l-methionine decarboxylase leader peptide, S-adenosylmethionine decarboxylase, core	nicotine biosynthesis	Yes
MSTRG.102210	Nitab4.5_0002338g0020	0.8559	FAD binding domain, L-aspartate oxidase, Fumarate reductase/succinate dehydrogenase flavoprotein-like, C-terminal, Succinate dehydrogenase/fumarate reductase flavoprotein, catalytic domain, FAD-dependent pyridine nucleotide-disulphide oxidoreductase	nicotine biosynthesis	Yes
MSTRG.102210	Nitab4.5_0006307g0010	0.8832	CO dehydrogenase flavoprotein-like, FAD-binding, subdomain 2, FAD-binding, type 2, FAD-binding, type 2, subdomain 1, FAD linked oxidase, N-terminal, Berberine/berberine-like	nicotine biosynthesis	Yes
MSTRG.102210	Nitab4.5_0011232g0010	0.8561	Spermidine/spermine synthases family, Putrescine N-methyltransferase	nicotine biosynthesis	Yes
MSTRG.102210	Nitab4.5_0015055g0010	0.8823	DNA-binding domain, AP2/ERF domain	nicotine biosynthesis	Yes
MSTRG.102649	Nitab4.5_0004816g0010	0.9698	Nicotinate-nucleotide pyrophosphorylase, Quinolinate phosphoribosyl transferase, C-terminal, Quinolinate phosphoribosyl transferase, N-terminal, Aldolase-type TIM barrel, Nicotinate-nucleotide pyrophosphorylase/Putative pyrophosphorylase ModD	nicotine biosynthesis
MSTRG.102817	Nitab4.5_0000003g0720	0.8944	Copper amine oxidase, N2-terminal, Copper amine oxidase, Copper amine oxidase, C-terminal, Copper amine oxidase, N-terminal, Copper amine oxidase, N2/N3-terminal, Copper amine oxidase, N3-terminal	nicotine biosynthesis
MSTRG.103040	Nitab4.5_0000013g0380	0.8535	Spermidine/spermine synthases family	nicotine biosynthesis
MSTRG.103040	Nitab4.5_0000031g0370	0.9442	NAD(P)-binding domain, NmrA-like	nicotine biosynthesis
MSTRG.103040	Nitab4.5_0000316g0090	0.9915	CO dehydrogenase flavoprotein-like, FAD-binding, subdomain 2, FAD-binding, type 2, Berberine/berberine-like, FAD-binding, type 2, subdomain 1, FAD linked oxidase, N-terminal	nicotine biosynthesis
MSTRG.103040	Nitab4.5_0000745g0170	0.8782	S-adenosylmethionine synthetase, central domain, S-adenosylmethionine synthetase, S-adenosylmethionine synthetase, C-terminal, S-adenosylmethionine synthetase, conserved site, S-adenosylmethionine synthetase superfamily, S-adenosylmethionine synthetase, N-terminal	nicotine biosynthesis
MSTRG.103040	Nitab4.5_0000884g0010	0.9402	NmrA-like, NAD(P)-binding domain	nicotine biosynthesis
MSTRG.103040	Nitab4.5_0001029g0080	0.9042	CO dehydrogenase flavoprotein-like, FAD-binding, subdomain 2, FAD linked oxidase, N-terminal, FAD-binding, type 2, subdomain 1, FAD-binding, type 2	nicotine biosynthesis
MSTRG.103040	Nitab4.5_0001965g0070	0.8567	S-adenosylmethionine decarboxylase, S-adenosylmethionine decarboxylase, conserved site, S-adenosylmethionine decarboxylase subgroup, S-adenosyl-l-methionine decarboxylase leader peptide, S-adenosylmethionine decarboxylase, core	nicotine biosynthesis
MSTRG.103040	Nitab4.5_0002338g0020	0.9264	FAD binding domain, L-aspartate oxidase, Fumarate reductase/succinate dehydrogenase flavoprotein-like, C-terminal, Succinate dehydrogenase/fumarate reductase flavoprotein, catalytic domain, FAD-dependent pyridine nucleotide-disulphide oxidoreductase	nicotine biosynthesis
MSTRG.103040	Nitab4.5_0002522g0070	0.8973	Fe-S metabolism associated domain, SufE-like, Quinolinate synthetase A	nicotine biosynthesis
MSTRG.103040	Nitab4.5_0003090g0030	0.8853	AP2/ERF domain, DNA-binding domain	nicotine biosynthesis
MSTRG.103040	Nitab4.5_0005830g0010	0.8765	Succinate dehydrogenase/fumarate reductase flavoprotein, catalytic domain, Fumarate reductase/succinate dehydrogenase flavoprotein-like, C-terminal, FAD binding domain, L-aspartate oxidase, FAD-dependent pyridine nucleotide-disulphide oxidoreductase	nicotine biosynthesis
MSTRG.103040	Nitab4.5_0006307g0010	0.9424	CO dehydrogenase flavoprotein-like, FAD-binding, subdomain 2, FAD-binding, type 2, FAD-binding, type 2, subdomain 1, FAD linked oxidase, N-terminal, Berberine/berberine-like	nicotine biosynthesis
MSTRG.103040	Nitab4.5_0011232g0010	0.9262	Spermidine/spermine synthases family, Putrescine N-methyltransferase	nicotine biosynthesis
MSTRG.103040	Nitab4.5_0015055g0010	0.9506	DNA-binding domain, AP2/ERF domain	nicotine biosynthesis
MSTRG.103192	Nitab4.5_0000063g0120	0.9034	S-adenosylmethionine synthetase, conserved site, S-adenosylmethionine synthetase superfamily, S-adenosylmethionine synthetase, N-terminal, S-adenosylmethionine synthetase, S-adenosylmethionine synthetase, C-terminal, S-adenosylmethionine synthetase, central domain	nicotine biosynthesis	Yes
MSTRG.103192	Nitab4.5_0000745g0170	0.8559	S-adenosylmethionine synthetase, central domain, S-adenosylmethionine synthetase, S-adenosylmethionine synthetase, C-terminal, S-adenosylmethionine synthetase, conserved site, S-adenosylmethionine synthetase superfamily, S-adenosylmethionine synthetase, N-terminal	nicotine biosynthesis	Yes
MSTRG.103216	Nitab4.5_0000034g0230	0.8622	Spermidine/spermine synthases family	nicotine biosynthesis
MSTRG.103318	Nitab4.5_0000013g0380	0.8991	Spermidine/spermine synthases family	nicotine biosynthesis	Yes
MSTRG.103318	Nitab4.5_0000013g0390	0.8748	Spermidine/spermine synthases family	nicotine biosynthesis
MSTRG.103318	Nitab4.5_0000025g0290	0.9093	Copper amine oxidase, C-terminal, Copper amine oxidase, N2-terminal, Copper amine oxidase, N3-terminal, Copper amine oxidase, N-terminal, Copper amine oxidase, N2/N3-terminal, Copper amine oxidase	nicotine biosynthesis	Yes
MSTRG.103318	Nitab4.5_0000031g0370	0.9001	NAD(P)-binding domain, NmrA-like	nicotine biosynthesis	Yes
MSTRG.103318	Nitab4.5_0000316g0090	0.8673	CO dehydrogenase flavoprotein-like, FAD-binding, subdomain 2, FAD-binding, type 2, Berberine/berberine-like, FAD-binding, type 2, subdomain 1, FAD linked oxidase, N-terminal	nicotine biosynthesis	Yes
MSTRG.103318	Nitab4.5_0000884g0010	0.9138	NmrA-like, NAD(P)-binding domain	nicotine biosynthesis	Yes
MSTRG.103318	Nitab4.5_0001029g0080	0.9077	CO dehydrogenase flavoprotein-like, FAD-binding, subdomain 2, FAD linked oxidase, N-terminal, FAD-binding, type 2, subdomain 1, FAD-binding, type 2	nicotine biosynthesis	Yes
MSTRG.103318	Nitab4.5_0002338g0020	0.9071	FAD binding domain, L-aspartate oxidase, Fumarate reductase/succinate dehydrogenase flavoprotein-like, C-terminal, Succinate dehydrogenase/fumarate reductase flavoprotein, catalytic domain, FAD-dependent pyridine nucleotide-disulphide oxidoreductase	nicotine biosynthesis	Yes
MSTRG.103318	Nitab4.5_0003090g0030	0.9095	AP2/ERF domain, DNA-binding domain	nicotine biosynthesis	Yes
MSTRG.103318	Nitab4.5_0003284g0010	0.8834	Spermidine/spermine synthases family, Putrescine N-methyltransferase	nicotine biosynthesis	Yes
MSTRG.103318	Nitab4.5_0003284g0040	0.8815	Spermidine/spermine synthases family, Putrescine N-methyltransferase	nicotine biosynthesis	Yes
MSTRG.103318	Nitab4.5_0005830g0010	0.8757	Succinate dehydrogenase/fumarate reductase flavoprotein, catalytic domain, Fumarate reductase/succinate dehydrogenase flavoprotein-like, C-terminal, FAD binding domain, L-aspartate oxidase, FAD-dependent pyridine nucleotide-disulphide oxidoreductase	nicotine biosynthesis	Yes
MSTRG.103318	Nitab4.5_0006307g0010	0.9097	CO dehydrogenase flavoprotein-like, FAD-binding, subdomain 2, FAD-binding, type 2, FAD-binding, type 2, subdomain 1, FAD linked oxidase, N-terminal, Berberine/berberine-like	nicotine biosynthesis	Yes
MSTRG.103318	Nitab4.5_0011232g0010	0.906	Spermidine/spermine synthases family, Putrescine N-methyltransferase	nicotine biosynthesis	Yes
MSTRG.103318	Nitab4.5_0015055g0010	0.8939	DNA-binding domain, AP2/ERF domain	nicotine biosynthesis	Yes
MSTRG.103380	Nitab4.5_0001270g0090	0.9233	Alanine racemase/group IV decarboxylase, C-terminal, Ornithine decarboxylase, Orn/DAP/Arg decarboxylase 2, pyridoxal-phosphate binding site, Orn/DAP/Arg decarboxylase 2, N-terminal, Orn/DAP/Arg decarboxylase 2, C-terminal, Ornithine/DAP/Arg decarboxylase	nicotine biosynthesis
MSTRG.103517	Nitab4.5_0010630g0010	0.8618	Orn/DAP/Arg decarboxylase 2, C-terminal, Orn/DAP/Arg decarboxylase 2, conserved site, Ornithine/DAP/Arg decarboxylase, Orn/DAP/Arg decarboxylase 2, pyridoxal-phosphate binding site, Orn/DAP/Arg decarboxylase 2, N-terminal, Arginine decarboxylase, Alanine racemase/group IV decarboxylase, C-terminal	nicotine biosynthesis
MSTRG.103596	Nitab4.5_0001270g0090	0.8928	Alanine racemase/group IV decarboxylase, C-terminal, Ornithine decarboxylase, Orn/DAP/Arg decarboxylase 2, pyridoxal-phosphate binding site, Orn/DAP/Arg decarboxylase 2, N-terminal, Orn/DAP/Arg decarboxylase 2, C-terminal, Ornithine/DAP/Arg decarboxylase	nicotine biosynthesis
MSTRG.103596	Nitab4.5_0003280g0010	0.8844	Alanine racemase/group IV decarboxylase, C-terminal, Orn/DAP/Arg decarboxylase 2, N-terminal, Ornithine/DAP/Arg decarboxylase, Orn/DAP/Arg decarboxylase 2, conserved site, Orn/DAP/Arg decarboxylase 2, pyridoxal-phosphate binding site, Orn/DAP/Arg decarboxylase 2, C-terminal, Ornithine decarboxylase	nicotine biosynthesis
MSTRG.103616	Nitab4.5_0003646g0010	0.8636	Spermidine/spermine synthases family	nicotine biosynthesis
MSTRG.103639	Nitab4.5_0000316g0090	0.855	CO dehydrogenase flavoprotein-like, FAD-binding, subdomain 2, FAD-binding, type 2, Berberine/berberine-like, FAD-binding, type 2, subdomain 1, FAD linked oxidase, N-terminal	nicotine biosynthesis	Yes
MSTRG.103639	Nitab4.5_0000745g0170	0.8603	S-adenosylmethionine synthetase, central domain, S-adenosylmethionine synthetase, S-adenosylmethionine synthetase, C-terminal, S-adenosylmethionine synthetase, conserved site, S-adenosylmethionine synthetase superfamily, S-adenosylmethionine synthetase, N-terminal	nicotine biosynthesis	Yes
MSTRG.103639	Nitab4.5_0001029g0080	0.8558	CO dehydrogenase flavoprotein-like, FAD-binding, subdomain 2, FAD linked oxidase, N-terminal, FAD-binding, type 2, subdomain 1, FAD-binding, type 2	nicotine biosynthesis	Yes
MSTRG.103639	Nitab4.5_0001965g0070	0.8631	S-adenosylmethionine decarboxylase, S-adenosylmethionine decarboxylase, conserved site, S-adenosylmethionine decarboxylase subgroup, S-adenosyl-l-methionine decarboxylase leader peptide, S-adenosylmethionine decarboxylase, core	nicotine biosynthesis	Yes
MSTRG.103704	Nitab4.5_0000745g0170	0.8625	S-adenosylmethionine synthetase, central domain, S-adenosylmethionine synthetase, S-adenosylmethionine synthetase, C-terminal, S-adenosylmethionine synthetase, conserved site, S-adenosylmethionine synthetase superfamily, S-adenosylmethionine synthetase, N-terminal	nicotine biosynthesis	Yes
MSTRG.103704	Nitab4.5_0001029g0080	0.8643	CO dehydrogenase flavoprotein-like, FAD-binding, subdomain 2, FAD linked oxidase, N-terminal, FAD-binding, type 2, subdomain 1, FAD-binding, type 2	nicotine biosynthesis	Yes
MSTRG.103825	Nitab4.5_0000031g0370	0.8949	NAD(P)-binding domain, NmrA-like	nicotine biosynthesis
MSTRG.103825	Nitab4.5_0000316g0090	0.9197	CO dehydrogenase flavoprotein-like, FAD-binding, subdomain 2, FAD-binding, type 2, Berberine/berberine-like, FAD-binding, type 2, subdomain 1, FAD linked oxidase, N-terminal	nicotine biosynthesis
MSTRG.103825	Nitab4.5_0000745g0170	0.9162	S-adenosylmethionine synthetase, central domain, S-adenosylmethionine synthetase, S-adenosylmethionine synthetase, C-terminal, S-adenosylmethionine synthetase, conserved site, S-adenosylmethionine synthetase superfamily, S-adenosylmethionine synthetase, N-terminal	nicotine biosynthesis
MSTRG.103825	Nitab4.5_0000884g0010	0.9065	NmrA-like, NAD(P)-binding domain	nicotine biosynthesis
MSTRG.103825	Nitab4.5_0001029g0080	0.9367	CO dehydrogenase flavoprotein-like, FAD-binding, subdomain 2, FAD linked oxidase, N-terminal, FAD-binding, type 2, subdomain 1, FAD-binding, type 2	nicotine biosynthesis
MSTRG.103825	Nitab4.5_0001965g0070	0.8527	S-adenosylmethionine decarboxylase, S-adenosylmethionine decarboxylase, conserved site, S-adenosylmethionine decarboxylase subgroup, S-adenosyl-l-methionine decarboxylase leader peptide, S-adenosylmethionine decarboxylase, core	nicotine biosynthesis
MSTRG.103825	Nitab4.5_0002338g0020	0.8928	FAD binding domain, L-aspartate oxidase, Fumarate reductase/succinate dehydrogenase flavoprotein-like, C-terminal, Succinate dehydrogenase/fumarate reductase flavoprotein, catalytic domain, FAD-dependent pyridine nucleotide-disulphide oxidoreductase	nicotine biosynthesis
MSTRG.103825	Nitab4.5_0003090g0030	0.8768	AP2/ERF domain, DNA-binding domain	nicotine biosynthesis
MSTRG.103825	Nitab4.5_0006307g0010	0.9066	CO dehydrogenase flavoprotein-like, FAD-binding, subdomain 2, FAD-binding, type 2, FAD-binding, type 2, subdomain 1, FAD linked oxidase, N-terminal, Berberine/berberine-like	nicotine biosynthesis
MSTRG.103825	Nitab4.5_0011232g0010	0.8931	Spermidine/spermine synthases family, Putrescine N-methyltransferase	nicotine biosynthesis
MSTRG.103825	Nitab4.5_0015055g0010	0.8942	DNA-binding domain, AP2/ERF domain	nicotine biosynthesis
MSTRG.103826	Nitab4.5_0000031g0370	0.9018	NAD(P)-binding domain, NmrA-like	nicotine biosynthesis
MSTRG.103826	Nitab4.5_0000316g0090	0.9693	CO dehydrogenase flavoprotein-like, FAD-binding, subdomain 2, FAD-binding, type 2, Berberine/berberine-like, FAD-binding, type 2, subdomain 1, FAD linked oxidase, N-terminal	nicotine biosynthesis
MSTRG.103826	Nitab4.5_0000745g0170	0.857	S-adenosylmethionine synthetase, central domain, S-adenosylmethionine synthetase, S-adenosylmethionine synthetase, C-terminal, S-adenosylmethionine synthetase, conserved site, S-adenosylmethionine synthetase superfamily, S-adenosylmethionine synthetase, N-terminal	nicotine biosynthesis
MSTRG.103826	Nitab4.5_0000884g0010	0.8934	NmrA-like, NAD(P)-binding domain	nicotine biosynthesis
MSTRG.103826	Nitab4.5_0001029g0080	0.8689	CO dehydrogenase flavoprotein-like, FAD-binding, subdomain 2, FAD linked oxidase, N-terminal, FAD-binding, type 2, subdomain 1, FAD-binding, type 2	nicotine biosynthesis
MSTRG.103826	Nitab4.5_0002338g0020	0.8797	FAD binding domain, L-aspartate oxidase, Fumarate reductase/succinate dehydrogenase flavoprotein-like, C-terminal, Succinate dehydrogenase/fumarate reductase flavoprotein, catalytic domain, FAD-dependent pyridine nucleotide-disulphide oxidoreductase	nicotine biosynthesis
MSTRG.103826	Nitab4.5_0002522g0070	0.8633	Fe-S metabolism associated domain, SufE-like, Quinolinate synthetase A	nicotine biosynthesis
MSTRG.103826	Nitab4.5_0006307g0010	0.8979	CO dehydrogenase flavoprotein-like, FAD-binding, subdomain 2, FAD-binding, type 2, FAD-binding, type 2, subdomain 1, FAD linked oxidase, N-terminal, Berberine/berberine-like	nicotine biosynthesis
MSTRG.103826	Nitab4.5_0011232g0010	0.8779	Spermidine/spermine synthases family, Putrescine N-methyltransferase	nicotine biosynthesis
MSTRG.103826	Nitab4.5_0015055g0010	0.911	DNA-binding domain, AP2/ERF domain	nicotine biosynthesis
MSTRG.103968	Nitab4.5_0000013g0380	0.8625	Spermidine/spermine synthases family	nicotine biosynthesis
MSTRG.103968	Nitab4.5_0000031g0370	0.8767	NAD(P)-binding domain, NmrA-like	nicotine biosynthesis
MSTRG.103968	Nitab4.5_0000316g0090	0.8662	CO dehydrogenase flavoprotein-like, FAD-binding, subdomain 2, FAD-binding, type 2, Berberine/berberine-like, FAD-binding, type 2, subdomain 1, FAD linked oxidase, N-terminal	nicotine biosynthesis
MSTRG.103968	Nitab4.5_0000884g0010	0.8932	NmrA-like, NAD(P)-binding domain	nicotine biosynthesis
MSTRG.103968	Nitab4.5_0001029g0080	0.9017	CO dehydrogenase flavoprotein-like, FAD-binding, subdomain 2, FAD linked oxidase, N-terminal, FAD-binding, type 2, subdomain 1, FAD-binding, type 2	nicotine biosynthesis
MSTRG.103968	Nitab4.5_0002338g0020	0.8834	FAD binding domain, L-aspartate oxidase, Fumarate reductase/succinate dehydrogenase flavoprotein-like, C-terminal, Succinate dehydrogenase/fumarate reductase flavoprotein, catalytic domain, FAD-dependent pyridine nucleotide-disulphide oxidoreductase	nicotine biosynthesis
MSTRG.103968	Nitab4.5_0003090g0030	0.8862	AP2/ERF domain, DNA-binding domain	nicotine biosynthesis
MSTRG.103968	Nitab4.5_0006307g0010	0.8864	CO dehydrogenase flavoprotein-like, FAD-binding, subdomain 2, FAD-binding, type 2, FAD-binding, type 2, subdomain 1, FAD linked oxidase, N-terminal, Berberine/berberine-like	nicotine biosynthesis
MSTRG.103968	Nitab4.5_0011232g0010	0.8844	Spermidine/spermine synthases family, Putrescine N-methyltransferase	nicotine biosynthesis
MSTRG.103968	Nitab4.5_0015055g0010	0.8713	DNA-binding domain, AP2/ERF domain	nicotine biosynthesis
MSTRG.103994	Nitab4.5_0000031g0370	0.9038	NAD(P)-binding domain, NmrA-like	nicotine biosynthesis
MSTRG.103994	Nitab4.5_0000316g0090	0.9532	CO dehydrogenase flavoprotein-like, FAD-binding, subdomain 2, FAD-binding, type 2, Berberine/berberine-like, FAD-binding, type 2, subdomain 1, FAD linked oxidase, N-terminal	nicotine biosynthesis
MSTRG.103994	Nitab4.5_0000884g0010	0.9008	NmrA-like, NAD(P)-binding domain	nicotine biosynthesis
MSTRG.103994	Nitab4.5_0002338g0020	0.8902	FAD binding domain, L-aspartate oxidase, Fumarate reductase/succinate dehydrogenase flavoprotein-like, C-terminal, Succinate dehydrogenase/fumarate reductase flavoprotein, catalytic domain, FAD-dependent pyridine nucleotide-disulphide oxidoreductase	nicotine biosynthesis
MSTRG.103994	Nitab4.5_0002522g0070	0.8674	Fe-S metabolism associated domain, SufE-like, Quinolinate synthetase A	nicotine biosynthesis
MSTRG.103994	Nitab4.5_0003090g0030	0.8543	AP2/ERF domain, DNA-binding domain	nicotine biosynthesis
MSTRG.103994	Nitab4.5_0005830g0010	0.8716	Succinate dehydrogenase/fumarate reductase flavoprotein, catalytic domain, Fumarate reductase/succinate dehydrogenase flavoprotein-like, C-terminal, FAD binding domain, L-aspartate oxidase, FAD-dependent pyridine nucleotide-disulphide oxidoreductase	nicotine biosynthesis
MSTRG.103994	Nitab4.5_0006307g0010	0.9337	CO dehydrogenase flavoprotein-like, FAD-binding, subdomain 2, FAD-binding, type 2, FAD-binding, type 2, subdomain 1, FAD linked oxidase, N-terminal, Berberine/berberine-like	nicotine biosynthesis
MSTRG.103994	Nitab4.5_0011232g0010	0.8874	Spermidine/spermine synthases family, Putrescine N-methyltransferase	nicotine biosynthesis
MSTRG.103994	Nitab4.5_0015055g0010	0.9122	DNA-binding domain, AP2/ERF domain	nicotine biosynthesis
MSTRG.104072	Nitab4.5_0000063g0120	0.8538	S-adenosylmethionine synthetase, conserved site, S-adenosylmethionine synthetase superfamily, S-adenosylmethionine synthetase, N-terminal, S-adenosylmethionine synthetase, S-adenosylmethionine synthetase, C-terminal, S-adenosylmethionine synthetase, central domain	nicotine biosynthesis	Yes
MSTRG.104072	Nitab4.5_0000316g0090	0.8701	CO dehydrogenase flavoprotein-like, FAD-binding, subdomain 2, FAD-binding, type 2, Berberine/berberine-like, FAD-binding, type 2, subdomain 1, FAD linked oxidase, N-terminal	nicotine biosynthesis	Yes
MSTRG.104072	Nitab4.5_0000745g0170	0.9039	S-adenosylmethionine synthetase, central domain, S-adenosylmethionine synthetase, S-adenosylmethionine synthetase, C-terminal, S-adenosylmethionine synthetase, conserved site, S-adenosylmethionine synthetase superfamily, S-adenosylmethionine synthetase, N-terminal	nicotine biosynthesis	Yes
MSTRG.104072	Nitab4.5_0001029g0080	0.932	CO dehydrogenase flavoprotein-like, FAD-binding, subdomain 2, FAD linked oxidase, N-terminal, FAD-binding, type 2, subdomain 1, FAD-binding, type 2	nicotine biosynthesis	Yes
MSTRG.104072	Nitab4.5_0001965g0070	0.8524	S-adenosylmethionine decarboxylase, S-adenosylmethionine decarboxylase, conserved site, S-adenosylmethionine decarboxylase subgroup, S-adenosyl-l-methionine decarboxylase leader peptide, S-adenosylmethionine decarboxylase, core	nicotine biosynthesis	Yes
MSTRG.104072	Nitab4.5_0004665g0010	0.8549	S-adenosylmethionine synthetase, conserved site, S-adenosylmethionine synthetase, S-adenosylmethionine synthetase superfamily, S-adenosylmethionine synthetase, C-terminal, S-adenosylmethionine synthetase, central domain, S-adenosylmethionine synthetase, N-terminal	nicotine biosynthesis
MSTRG.104073	Nitab4.5_0000063g0120	0.8786	S-adenosylmethionine synthetase, conserved site, S-adenosylmethionine synthetase superfamily, S-adenosylmethionine synthetase, N-terminal, S-adenosylmethionine synthetase, S-adenosylmethionine synthetase, C-terminal, S-adenosylmethionine synthetase, central domain	nicotine biosynthesis	Yes
MSTRG.104073	Nitab4.5_0000316g0090	0.8951	CO dehydrogenase flavoprotein-like, FAD-binding, subdomain 2, FAD-binding, type 2, Berberine/berberine-like, FAD-binding, type 2, subdomain 1, FAD linked oxidase, N-terminal	nicotine biosynthesis	Yes
MSTRG.104073	Nitab4.5_0000745g0170	0.9268	S-adenosylmethionine synthetase, central domain, S-adenosylmethionine synthetase, S-adenosylmethionine synthetase, C-terminal, S-adenosylmethionine synthetase, conserved site, S-adenosylmethionine synthetase superfamily, S-adenosylmethionine synthetase, N-terminal	nicotine biosynthesis	Yes
MSTRG.104073	Nitab4.5_0001029g0080	0.9443	CO dehydrogenase flavoprotein-like, FAD-binding, subdomain 2, FAD linked oxidase, N-terminal, FAD-binding, type 2, subdomain 1, FAD-binding, type 2	nicotine biosynthesis	Yes
MSTRG.104073	Nitab4.5_0001965g0070	0.8726	S-adenosylmethionine decarboxylase, S-adenosylmethionine decarboxylase, conserved site, S-adenosylmethionine decarboxylase subgroup, S-adenosyl-l-methionine decarboxylase leader peptide, S-adenosylmethionine decarboxylase, core	nicotine biosynthesis	Yes
MSTRG.104073	Nitab4.5_0004665g0010	0.8937	S-adenosylmethionine synthetase, conserved site, S-adenosylmethionine synthetase, S-adenosylmethionine synthetase superfamily, S-adenosylmethionine synthetase, C-terminal, S-adenosylmethionine synthetase, central domain, S-adenosylmethionine synthetase, N-terminal	nicotine biosynthesis
MSTRG.104114	Nitab4.5_0000013g0380	0.8816	Spermidine/spermine synthases family	nicotine biosynthesis	Yes
MSTRG.104114	Nitab4.5_0000025g0290	0.8674	Copper amine oxidase, C-terminal, Copper amine oxidase, N2-terminal, Copper amine oxidase, N3-terminal, Copper amine oxidase, N-terminal, Copper amine oxidase, N2/N3-terminal, Copper amine oxidase	nicotine biosynthesis	Yes
MSTRG.104114	Nitab4.5_0000031g0370	0.9386	NAD(P)-binding domain, NmrA-like	nicotine biosynthesis	Yes
MSTRG.104114	Nitab4.5_0000316g0090	0.9623	CO dehydrogenase flavoprotein-like, FAD-binding, subdomain 2, FAD-binding, type 2, Berberine/berberine-like, FAD-binding, type 2, subdomain 1, FAD linked oxidase, N-terminal	nicotine biosynthesis	Yes
MSTRG.104114	Nitab4.5_0000745g0170	0.9082	S-adenosylmethionine synthetase, central domain, S-adenosylmethionine synthetase, S-adenosylmethionine synthetase, C-terminal, S-adenosylmethionine synthetase, conserved site, S-adenosylmethionine synthetase superfamily, S-adenosylmethionine synthetase, N-terminal	nicotine biosynthesis	Yes
MSTRG.104114	Nitab4.5_0000884g0010	0.9457	NmrA-like, NAD(P)-binding domain	nicotine biosynthesis	Yes
MSTRG.104114	Nitab4.5_0001029g0080	0.945	CO dehydrogenase flavoprotein-like, FAD-binding, subdomain 2, FAD linked oxidase, N-terminal, FAD-binding, type 2, subdomain 1, FAD-binding, type 2	nicotine biosynthesis	Yes
MSTRG.104114	Nitab4.5_0001965g0070	0.8615	S-adenosylmethionine decarboxylase, S-adenosylmethionine decarboxylase, conserved site, S-adenosylmethionine decarboxylase subgroup, S-adenosyl-l-methionine decarboxylase leader peptide, S-adenosylmethionine decarboxylase, core	nicotine biosynthesis	Yes
MSTRG.104114	Nitab4.5_0002338g0020	0.9329	FAD binding domain, L-aspartate oxidase, Fumarate reductase/succinate dehydrogenase flavoprotein-like, C-terminal, Succinate dehydrogenase/fumarate reductase flavoprotein, catalytic domain, FAD-dependent pyridine nucleotide-disulphide oxidoreductase	nicotine biosynthesis	Yes
MSTRG.104114	Nitab4.5_0002522g0070	0.8749	Fe-S metabolism associated domain, SufE-like, Quinolinate synthetase A	nicotine biosynthesis	Yes
MSTRG.104114	Nitab4.5_0003090g0030	0.9122	AP2/ERF domain, DNA-binding domain	nicotine biosynthesis	Yes
MSTRG.104114	Nitab4.5_0003284g0040	0.8588	Spermidine/spermine synthases family, Putrescine N-methyltransferase	nicotine biosynthesis	Yes
MSTRG.104114	Nitab4.5_0005830g0010	0.8743	Succinate dehydrogenase/fumarate reductase flavoprotein, catalytic domain, Fumarate reductase/succinate dehydrogenase flavoprotein-like, C-terminal, FAD binding domain, L-aspartate oxidase, FAD-dependent pyridine nucleotide-disulphide oxidoreductase	nicotine biosynthesis	Yes
MSTRG.104114	Nitab4.5_0006307g0010	0.9446	CO dehydrogenase flavoprotein-like, FAD-binding, subdomain 2, FAD-binding, type 2, FAD-binding, type 2, subdomain 1, FAD linked oxidase, N-terminal, Berberine/berberine-like	nicotine biosynthesis	Yes
MSTRG.104114	Nitab4.5_0011232g0010	0.933	Spermidine/spermine synthases family, Putrescine N-methyltransferase	nicotine biosynthesis	Yes
MSTRG.104114	Nitab4.5_0015055g0010	0.9395	DNA-binding domain, AP2/ERF domain	nicotine biosynthesis	Yes
MSTRG.104163	Nitab4.5_0006307g0010	0.8634	CO dehydrogenase flavoprotein-like, FAD-binding, subdomain 2, FAD-binding, type 2, FAD-binding, type 2, subdomain 1, FAD linked oxidase, N-terminal, Berberine/berberine-like	nicotine biosynthesis	Yes
MSTRG.104218	Nitab4.5_0000013g0380	0.9145	Spermidine/spermine synthases family	nicotine biosynthesis	Yes
MSTRG.104218	Nitab4.5_0000013g0390	0.89	Spermidine/spermine synthases family	nicotine biosynthesis
MSTRG.104218	Nitab4.5_0000025g0290	0.9005	Copper amine oxidase, C-terminal, Copper amine oxidase, N2-terminal, Copper amine oxidase, N3-terminal, Copper amine oxidase, N-terminal, Copper amine oxidase, N2/N3-terminal, Copper amine oxidase	nicotine biosynthesis	Yes
MSTRG.104218	Nitab4.5_0000031g0370	0.9234	NAD(P)-binding domain, NmrA-like	nicotine biosynthesis	Yes
MSTRG.104218	Nitab4.5_0000316g0090	0.9082	CO dehydrogenase flavoprotein-like, FAD-binding, subdomain 2, FAD-binding, type 2, Berberine/berberine-like, FAD-binding, type 2, subdomain 1, FAD linked oxidase, N-terminal	nicotine biosynthesis	Yes
MSTRG.104218	Nitab4.5_0000884g0010	0.937	NmrA-like, NAD(P)-binding domain	nicotine biosynthesis	Yes
MSTRG.104218	Nitab4.5_0001029g0080	0.8988	CO dehydrogenase flavoprotein-like, FAD-binding, subdomain 2, FAD linked oxidase, N-terminal, FAD-binding, type 2, subdomain 1, FAD-binding, type 2	nicotine biosynthesis	Yes
MSTRG.104218	Nitab4.5_0002338g0020	0.9307	FAD binding domain, L-aspartate oxidase, Fumarate reductase/succinate dehydrogenase flavoprotein-like, C-terminal, Succinate dehydrogenase/fumarate reductase flavoprotein, catalytic domain, FAD-dependent pyridine nucleotide-disulphide oxidoreductase	nicotine biosynthesis	Yes
MSTRG.104218	Nitab4.5_0002522g0070	0.8507	Fe-S metabolism associated domain, SufE-like, Quinolinate synthetase A	nicotine biosynthesis	Yes
MSTRG.104218	Nitab4.5_0003090g0030	0.9336	AP2/ERF domain, DNA-binding domain	nicotine biosynthesis	Yes
MSTRG.104218	Nitab4.5_0003284g0010	0.8957	Spermidine/spermine synthases family, Putrescine N-methyltransferase	nicotine biosynthesis	Yes
MSTRG.104218	Nitab4.5_0003284g0040	0.8985	Spermidine/spermine synthases family, Putrescine N-methyltransferase	nicotine biosynthesis	Yes
MSTRG.104218	Nitab4.5_0005830g0010	0.8823	Succinate dehydrogenase/fumarate reductase flavoprotein, catalytic domain, Fumarate reductase/succinate dehydrogenase flavoprotein-like, C-terminal, FAD binding domain, L-aspartate oxidase, FAD-dependent pyridine nucleotide-disulphide oxidoreductase	nicotine biosynthesis	Yes
MSTRG.104218	Nitab4.5_0006307g0010	0.9373	CO dehydrogenase flavoprotein-like, FAD-binding, subdomain 2, FAD-binding, type 2, FAD-binding, type 2, subdomain 1, FAD linked oxidase, N-terminal, Berberine/berberine-like	nicotine biosynthesis	Yes
MSTRG.104218	Nitab4.5_0011232g0010	0.9309	Spermidine/spermine synthases family, Putrescine N-methyltransferase	nicotine biosynthesis	Yes
MSTRG.104218	Nitab4.5_0015055g0010	0.9177	DNA-binding domain, AP2/ERF domain	nicotine biosynthesis	Yes
MSTRG.104258	Nitab4.5_0000013g0380	0.9004	Spermidine/spermine synthases family	nicotine biosynthesis
MSTRG.104258	Nitab4.5_0000013g0390	0.8979	Spermidine/spermine synthases family	nicotine biosynthesis
MSTRG.104258	Nitab4.5_0000025g0290	0.902	Copper amine oxidase, C-terminal, Copper amine oxidase, N2-terminal, Copper amine oxidase, N3-terminal, Copper amine oxidase, N-terminal, Copper amine oxidase, N2/N3-terminal, Copper amine oxidase	nicotine biosynthesis
MSTRG.104258	Nitab4.5_0000031g0370	0.8662	NAD(P)-binding domain, NmrA-like	nicotine biosynthesis
MSTRG.104258	Nitab4.5_0000884g0010	0.8738	NmrA-like, NAD(P)-binding domain	nicotine biosynthesis
MSTRG.104258	Nitab4.5_0002338g0020	0.8769	FAD binding domain, L-aspartate oxidase, Fumarate reductase/succinate dehydrogenase flavoprotein-like, C-terminal, Succinate dehydrogenase/fumarate reductase flavoprotein, catalytic domain, FAD-dependent pyridine nucleotide-disulphide oxidoreductase	nicotine biosynthesis
MSTRG.104258	Nitab4.5_0003090g0030	0.894	AP2/ERF domain, DNA-binding domain	nicotine biosynthesis
MSTRG.104258	Nitab4.5_0003284g0010	0.9014	Spermidine/spermine synthases family, Putrescine N-methyltransferase	nicotine biosynthesis
MSTRG.104258	Nitab4.5_0003284g0040	0.8901	Spermidine/spermine synthases family, Putrescine N-methyltransferase	nicotine biosynthesis
MSTRG.104258	Nitab4.5_0005830g0010	0.8595	Succinate dehydrogenase/fumarate reductase flavoprotein, catalytic domain, Fumarate reductase/succinate dehydrogenase flavoprotein-like, C-terminal, FAD binding domain, L-aspartate oxidase, FAD-dependent pyridine nucleotide-disulphide oxidoreductase	nicotine biosynthesis
MSTRG.104258	Nitab4.5_0006307g0010	0.8628	CO dehydrogenase flavoprotein-like, FAD-binding, subdomain 2, FAD-binding, type 2, FAD-binding, type 2, subdomain 1, FAD linked oxidase, N-terminal, Berberine/berberine-like	nicotine biosynthesis
MSTRG.104258	Nitab4.5_0011232g0010	0.8779	Spermidine/spermine synthases family, Putrescine N-methyltransferase	nicotine biosynthesis
MSTRG.104258	Nitab4.5_0015055g0010	0.8622	DNA-binding domain, AP2/ERF domain	nicotine biosynthesis
MSTRG.104674	Nitab4.5_0004816g0010	0.8772	Nicotinate-nucleotide pyrophosphorylase, Quinolinate phosphoribosyl transferase, C-terminal, Quinolinate phosphoribosyl transferase, N-terminal, Aldolase-type TIM barrel, Nicotinate-nucleotide pyrophosphorylase/Putative pyrophosphorylase ModD	nicotine biosynthesis
MSTRG.104715	Nitab4.5_0000031g0370	0.8732	NAD(P)-binding domain, NmrA-like	nicotine biosynthesis	Yes
MSTRG.104715	Nitab4.5_0000316g0090	0.8763	CO dehydrogenase flavoprotein-like, FAD-binding, subdomain 2, FAD-binding, type 2, Berberine/berberine-like, FAD-binding, type 2, subdomain 1, FAD linked oxidase, N-terminal	nicotine biosynthesis	Yes
MSTRG.104715	Nitab4.5_0000745g0170	0.8673	S-adenosylmethionine synthetase, central domain, S-adenosylmethionine synthetase, S-adenosylmethionine synthetase, C-terminal, S-adenosylmethionine synthetase, conserved site, S-adenosylmethionine synthetase superfamily, S-adenosylmethionine synthetase, N-terminal	nicotine biosynthesis	Yes
MSTRG.104715	Nitab4.5_0000884g0010	0.888	NmrA-like, NAD(P)-binding domain	nicotine biosynthesis	Yes
MSTRG.104715	Nitab4.5_0001029g0080	0.9371	CO dehydrogenase flavoprotein-like, FAD-binding, subdomain 2, FAD linked oxidase, N-terminal, FAD-binding, type 2, subdomain 1, FAD-binding, type 2	nicotine biosynthesis	Yes
MSTRG.104715	Nitab4.5_0002338g0020	0.8789	FAD binding domain, L-aspartate oxidase, Fumarate reductase/succinate dehydrogenase flavoprotein-like, C-terminal, Succinate dehydrogenase/fumarate reductase flavoprotein, catalytic domain, FAD-dependent pyridine nucleotide-disulphide oxidoreductase	nicotine biosynthesis	Yes
MSTRG.104715	Nitab4.5_0003090g0030	0.8742	AP2/ERF domain, DNA-binding domain	nicotine biosynthesis	Yes
MSTRG.104715	Nitab4.5_0006307g0010	0.8783	CO dehydrogenase flavoprotein-like, FAD-binding, subdomain 2, FAD-binding, type 2, FAD-binding, type 2, subdomain 1, FAD linked oxidase, N-terminal, Berberine/berberine-like	nicotine biosynthesis	Yes
MSTRG.104715	Nitab4.5_0011232g0010	0.8768	Spermidine/spermine synthases family, Putrescine N-methyltransferase	nicotine biosynthesis	Yes
MSTRG.104715	Nitab4.5_0015055g0010	0.8679	DNA-binding domain, AP2/ERF domain	nicotine biosynthesis	Yes
MSTRG.104908	Nitab4.5_0001965g0070	0.8821	S-adenosylmethionine decarboxylase, S-adenosylmethionine decarboxylase, conserved site, S-adenosylmethionine decarboxylase subgroup, S-adenosyl-l-methionine decarboxylase leader peptide, S-adenosylmethionine decarboxylase, core	nicotine biosynthesis	Yes
MSTRG.10581	Nitab4.5_0001270g0090	0.9038	Alanine racemase/group IV decarboxylase, C-terminal, Ornithine decarboxylase, Orn/DAP/Arg decarboxylase 2, pyridoxal-phosphate binding site, Orn/DAP/Arg decarboxylase 2, N-terminal, Orn/DAP/Arg decarboxylase 2, C-terminal, Ornithine/DAP/Arg decarboxylase	nicotine biosynthesis
MSTRG.10581	Nitab4.5_0003280g0010	0.9163	Alanine racemase/group IV decarboxylase, C-terminal, Orn/DAP/Arg decarboxylase 2, N-terminal, Ornithine/DAP/Arg decarboxylase, Orn/DAP/Arg decarboxylase 2, conserved site, Orn/DAP/Arg decarboxylase 2, pyridoxal-phosphate binding site, Orn/DAP/Arg decarboxylase 2, C-terminal, Ornithine decarboxylase	nicotine biosynthesis
MSTRG.10588	Nitab4.5_0004665g0010	0.871	S-adenosylmethionine synthetase, conserved site, S-adenosylmethionine synthetase, S-adenosylmethionine synthetase superfamily, S-adenosylmethionine synthetase, C-terminal, S-adenosylmethionine synthetase, central domain, S-adenosylmethionine synthetase, N-terminal	nicotine biosynthesis
MSTRG.106045	Nitab4.5_0000895g0150	0.8551	S-adenosylmethionine synthetase superfamily, S-adenosylmethionine synthetase, conserved site, S-adenosylmethionine synthetase, central domain, S-adenosylmethionine synthetase, S-adenosylmethionine synthetase, C-terminal, S-adenosylmethionine synthetase, N-terminal	nicotine biosynthesis
MSTRG.106045	Nitab4.5_0004665g0010	0.8677	S-adenosylmethionine synthetase, conserved site, S-adenosylmethionine synthetase, S-adenosylmethionine synthetase superfamily, S-adenosylmethionine synthetase, C-terminal, S-adenosylmethionine synthetase, central domain, S-adenosylmethionine synthetase, N-terminal	nicotine biosynthesis
MSTRG.10606	Nitab4.5_0000063g0120	0.8885	S-adenosylmethionine synthetase, conserved site, S-adenosylmethionine synthetase superfamily, S-adenosylmethionine synthetase, N-terminal, S-adenosylmethionine synthetase, S-adenosylmethionine synthetase, C-terminal, S-adenosylmethionine synthetase, central domain	nicotine biosynthesis	Yes
MSTRG.10606	Nitab4.5_0000745g0170	0.8868	S-adenosylmethionine synthetase, central domain, S-adenosylmethionine synthetase, S-adenosylmethionine synthetase, C-terminal, S-adenosylmethionine synthetase, conserved site, S-adenosylmethionine synthetase superfamily, S-adenosylmethionine synthetase, N-terminal	nicotine biosynthesis	Yes
MSTRG.10606	Nitab4.5_0001029g0080	0.9489	CO dehydrogenase flavoprotein-like, FAD-binding, subdomain 2, FAD linked oxidase, N-terminal, FAD-binding, type 2, subdomain 1, FAD-binding, type 2	nicotine biosynthesis	Yes
MSTRG.106111	Nitab4.5_0000031g0370	0.8837	NAD(P)-binding domain, NmrA-like	nicotine biosynthesis
MSTRG.106111	Nitab4.5_0000316g0090	0.9616	CO dehydrogenase flavoprotein-like, FAD-binding, subdomain 2, FAD-binding, type 2, Berberine/berberine-like, FAD-binding, type 2, subdomain 1, FAD linked oxidase, N-terminal	nicotine biosynthesis
MSTRG.106111	Nitab4.5_0000745g0170	0.9406	S-adenosylmethionine synthetase, central domain, S-adenosylmethionine synthetase, S-adenosylmethionine synthetase, C-terminal, S-adenosylmethionine synthetase, conserved site, S-adenosylmethionine synthetase superfamily, S-adenosylmethionine synthetase, N-terminal	nicotine biosynthesis
MSTRG.106111	Nitab4.5_0000884g0010	0.883	NmrA-like, NAD(P)-binding domain	nicotine biosynthesis
MSTRG.106111	Nitab4.5_0001029g0080	0.9295	CO dehydrogenase flavoprotein-like, FAD-binding, subdomain 2, FAD linked oxidase, N-terminal, FAD-binding, type 2, subdomain 1, FAD-binding, type 2	nicotine biosynthesis
MSTRG.106111	Nitab4.5_0001965g0070	0.88	S-adenosylmethionine decarboxylase, S-adenosylmethionine decarboxylase, conserved site, S-adenosylmethionine decarboxylase subgroup, S-adenosyl-l-methionine decarboxylase leader peptide, S-adenosylmethionine decarboxylase, core	nicotine biosynthesis
MSTRG.106111	Nitab4.5_0002338g0020	0.863	FAD binding domain, L-aspartate oxidase, Fumarate reductase/succinate dehydrogenase flavoprotein-like, C-terminal, Succinate dehydrogenase/fumarate reductase flavoprotein, catalytic domain, FAD-dependent pyridine nucleotide-disulphide oxidoreductase	nicotine biosynthesis
MSTRG.106111	Nitab4.5_0006307g0010	0.89	CO dehydrogenase flavoprotein-like, FAD-binding, subdomain 2, FAD-binding, type 2, FAD-binding, type 2, subdomain 1, FAD linked oxidase, N-terminal, Berberine/berberine-like	nicotine biosynthesis
MSTRG.106111	Nitab4.5_0011232g0010	0.8631	Spermidine/spermine synthases family, Putrescine N-methyltransferase	nicotine biosynthesis
MSTRG.106111	Nitab4.5_0015055g0010	0.892	DNA-binding domain, AP2/ERF domain	nicotine biosynthesis
MSTRG.106333	Nitab4.5_0004816g0010	0.9302	Nicotinate-nucleotide pyrophosphorylase, Quinolinate phosphoribosyl transferase, C-terminal, Quinolinate phosphoribosyl transferase, N-terminal, Aldolase-type TIM barrel, Nicotinate-nucleotide pyrophosphorylase/Putative pyrophosphorylase ModD	nicotine biosynthesis
MSTRG.10645	Nitab4.5_0000025g0290	0.8512	Copper amine oxidase, C-terminal, Copper amine oxidase, N2-terminal, Copper amine oxidase, N3-terminal, Copper amine oxidase, N-terminal, Copper amine oxidase, N2/N3-terminal, Copper amine oxidase	nicotine biosynthesis	Yes
MSTRG.10645	Nitab4.5_0002338g0020	0.8522	FAD binding domain, L-aspartate oxidase, Fumarate reductase/succinate dehydrogenase flavoprotein-like, C-terminal, Succinate dehydrogenase/fumarate reductase flavoprotein, catalytic domain, FAD-dependent pyridine nucleotide-disulphide oxidoreductase	nicotine biosynthesis	Yes
MSTRG.10645	Nitab4.5_0003090g0030	0.8625	AP2/ERF domain, DNA-binding domain	nicotine biosynthesis	Yes
MSTRG.106482	Nitab4.5_0000031g0370	0.8506	NAD(P)-binding domain, NmrA-like	nicotine biosynthesis	Yes
MSTRG.106482	Nitab4.5_0000316g0090	0.9096	CO dehydrogenase flavoprotein-like, FAD-binding, subdomain 2, FAD-binding, type 2, Berberine/berberine-like, FAD-binding, type 2, subdomain 1, FAD linked oxidase, N-terminal	nicotine biosynthesis	Yes
MSTRG.106482	Nitab4.5_0000745g0170	0.9102	S-adenosylmethionine synthetase, central domain, S-adenosylmethionine synthetase, S-adenosylmethionine synthetase, C-terminal, S-adenosylmethionine synthetase, conserved site, S-adenosylmethionine synthetase superfamily, S-adenosylmethionine synthetase, N-terminal	nicotine biosynthesis	Yes
MSTRG.106482	Nitab4.5_0000884g0010	0.8553	NmrA-like, NAD(P)-binding domain	nicotine biosynthesis	Yes
MSTRG.106482	Nitab4.5_0001029g0080	0.8883	CO dehydrogenase flavoprotein-like, FAD-binding, subdomain 2, FAD linked oxidase, N-terminal, FAD-binding, type 2, subdomain 1, FAD-binding, type 2	nicotine biosynthesis	Yes
MSTRG.106482	Nitab4.5_0006307g0010	0.8685	CO dehydrogenase flavoprotein-like, FAD-binding, subdomain 2, FAD-binding, type 2, FAD-binding, type 2, subdomain 1, FAD linked oxidase, N-terminal, Berberine/berberine-like	nicotine biosynthesis	Yes
MSTRG.106482	Nitab4.5_0008312g0060	0.8537	S-adenosylmethionine synthetase, conserved site, S-adenosylmethionine synthetase, S-adenosylmethionine synthetase, C-terminal, S-adenosylmethionine synthetase superfamily, S-adenosylmethionine synthetase, central domain, S-adenosylmethionine synthetase, N-terminal	nicotine biosynthesis
MSTRG.106482	Nitab4.5_0015055g0010	0.8537	DNA-binding domain, AP2/ERF domain	nicotine biosynthesis	Yes
MSTRG.106626	Nitab4.5_0000003g0720	0.8843	Copper amine oxidase, N2-terminal, Copper amine oxidase, Copper amine oxidase, C-terminal, Copper amine oxidase, N-terminal, Copper amine oxidase, N2/N3-terminal, Copper amine oxidase, N3-terminal	nicotine biosynthesis
MSTRG.106803	Nitab4.5_0000063g0120	0.8718	S-adenosylmethionine synthetase, conserved site, S-adenosylmethionine synthetase superfamily, S-adenosylmethionine synthetase, N-terminal, S-adenosylmethionine synthetase, S-adenosylmethionine synthetase, C-terminal, S-adenosylmethionine synthetase, central domain	nicotine biosynthesis	Yes
MSTRG.106803	Nitab4.5_0000745g0170	0.858	S-adenosylmethionine synthetase, central domain, S-adenosylmethionine synthetase, S-adenosylmethionine synthetase, C-terminal, S-adenosylmethionine synthetase, conserved site, S-adenosylmethionine synthetase superfamily, S-adenosylmethionine synthetase, N-terminal	nicotine biosynthesis	Yes
MSTRG.106803	Nitab4.5_0001029g0080	0.9224	CO dehydrogenase flavoprotein-like, FAD-binding, subdomain 2, FAD linked oxidase, N-terminal, FAD-binding, type 2, subdomain 1, FAD-binding, type 2	nicotine biosynthesis	Yes
MSTRG.106864	Nitab4.5_0000155g0200	0.8595	S-adenosylmethionine synthetase superfamily, S-adenosylmethionine synthetase, conserved site, S-adenosylmethionine synthetase, S-adenosylmethionine synthetase, N-terminal, S-adenosylmethionine synthetase, central domain, S-adenosylmethionine synthetase, C-terminal	nicotine biosynthesis
MSTRG.107088	Nitab4.5_0004816g0010	0.9804	Nicotinate-nucleotide pyrophosphorylase, Quinolinate phosphoribosyl transferase, C-terminal, Quinolinate phosphoribosyl transferase, N-terminal, Aldolase-type TIM barrel, Nicotinate-nucleotide pyrophosphorylase/Putative pyrophosphorylase ModD	nicotine biosynthesis
MSTRG.107164	Nitab4.5_0002115g0020	0.8516	S-adenosylmethionine synthetase, S-adenosylmethionine synthetase, central domain, S-adenosylmethionine synthetase superfamily, S-adenosylmethionine synthetase, C-terminal, S-adenosylmethionine synthetase, conserved site, S-adenosylmethionine synthetase, N-terminal	nicotine biosynthesis
MSTRG.107526	Nitab4.5_0004816g0010	0.8608	Nicotinate-nucleotide pyrophosphorylase, Quinolinate phosphoribosyl transferase, C-terminal, Quinolinate phosphoribosyl transferase, N-terminal, Aldolase-type TIM barrel, Nicotinate-nucleotide pyrophosphorylase/Putative pyrophosphorylase ModD	nicotine biosynthesis
MSTRG.107565	Nitab4.5_0000031g0370	0.8537	NAD(P)-binding domain, NmrA-like	nicotine biosynthesis	Yes
MSTRG.107565	Nitab4.5_0000884g0010	0.8726	NmrA-like, NAD(P)-binding domain	nicotine biosynthesis	Yes
MSTRG.107565	Nitab4.5_0001029g0080	0.9019	CO dehydrogenase flavoprotein-like, FAD-binding, subdomain 2, FAD linked oxidase, N-terminal, FAD-binding, type 2, subdomain 1, FAD-binding, type 2	nicotine biosynthesis	Yes
MSTRG.107565	Nitab4.5_0002338g0020	0.8631	FAD binding domain, L-aspartate oxidase, Fumarate reductase/succinate dehydrogenase flavoprotein-like, C-terminal, Succinate dehydrogenase/fumarate reductase flavoprotein, catalytic domain, FAD-dependent pyridine nucleotide-disulphide oxidoreductase	nicotine biosynthesis	Yes
MSTRG.107565	Nitab4.5_0003090g0030	0.8696	AP2/ERF domain, DNA-binding domain	nicotine biosynthesis	Yes
MSTRG.107565	Nitab4.5_0006307g0010	0.8659	CO dehydrogenase flavoprotein-like, FAD-binding, subdomain 2, FAD-binding, type 2, FAD-binding, type 2, subdomain 1, FAD linked oxidase, N-terminal, Berberine/berberine-like	nicotine biosynthesis	Yes
MSTRG.107565	Nitab4.5_0011232g0010	0.8633	Spermidine/spermine synthases family, Putrescine N-methyltransferase	nicotine biosynthesis	Yes
MSTRG.108155	Nitab4.5_0000003g0720	0.865	Copper amine oxidase, N2-terminal, Copper amine oxidase, Copper amine oxidase, C-terminal, Copper amine oxidase, N-terminal, Copper amine oxidase, N2/N3-terminal, Copper amine oxidase, N3-terminal	nicotine biosynthesis
MSTRG.108180	Nitab4.5_0000034g0230	0.8525	Spermidine/spermine synthases family	nicotine biosynthesis
MSTRG.108180	Nitab4.5_0003646g0010	0.8777	Spermidine/spermine synthases family	nicotine biosynthesis
MSTRG.108589	Nitab4.5_0000316g0090	0.8638	CO dehydrogenase flavoprotein-like, FAD-binding, subdomain 2, FAD-binding, type 2, Berberine/berberine-like, FAD-binding, type 2, subdomain 1, FAD linked oxidase, N-terminal	nicotine biosynthesis
MSTRG.108621	Nitab4.5_0000013g0380	0.9392	Spermidine/spermine synthases family	nicotine biosynthesis
MSTRG.108621	Nitab4.5_0000013g0390	0.9703	Spermidine/spermine synthases family	nicotine biosynthesis
MSTRG.108621	Nitab4.5_0000025g0290	0.9274	Copper amine oxidase, C-terminal, Copper amine oxidase, N2-terminal, Copper amine oxidase, N3-terminal, Copper amine oxidase, N-terminal, Copper amine oxidase, N2/N3-terminal, Copper amine oxidase	nicotine biosynthesis
MSTRG.108621	Nitab4.5_0000031g0370	0.8833	NAD(P)-binding domain, NmrA-like	nicotine biosynthesis
MSTRG.108621	Nitab4.5_0000884g0010	0.8988	NmrA-like, NAD(P)-binding domain	nicotine biosynthesis
MSTRG.108621	Nitab4.5_0002338g0020	0.9046	FAD binding domain, L-aspartate oxidase, Fumarate reductase/succinate dehydrogenase flavoprotein-like, C-terminal, Succinate dehydrogenase/fumarate reductase flavoprotein, catalytic domain, FAD-dependent pyridine nucleotide-disulphide oxidoreductase	nicotine biosynthesis
MSTRG.108621	Nitab4.5_0003090g0030	0.9368	AP2/ERF domain, DNA-binding domain	nicotine biosynthesis
MSTRG.108621	Nitab4.5_0003284g0010	0.9522	Spermidine/spermine synthases family, Putrescine N-methyltransferase	nicotine biosynthesis
MSTRG.108621	Nitab4.5_0003284g0040	0.9371	Spermidine/spermine synthases family, Putrescine N-methyltransferase	nicotine biosynthesis
MSTRG.108621	Nitab4.5_0005830g0010	0.8789	Succinate dehydrogenase/fumarate reductase flavoprotein, catalytic domain, Fumarate reductase/succinate dehydrogenase flavoprotein-like, C-terminal, FAD binding domain, L-aspartate oxidase, FAD-dependent pyridine nucleotide-disulphide oxidoreductase	nicotine biosynthesis
MSTRG.108621	Nitab4.5_0006307g0010	0.8795	CO dehydrogenase flavoprotein-like, FAD-binding, subdomain 2, FAD-binding, type 2, FAD-binding, type 2, subdomain 1, FAD linked oxidase, N-terminal, Berberine/berberine-like	nicotine biosynthesis
MSTRG.108621	Nitab4.5_0011232g0010	0.9059	Spermidine/spermine synthases family, Putrescine N-methyltransferase	nicotine biosynthesis
MSTRG.108621	Nitab4.5_0015055g0010	0.8698	DNA-binding domain, AP2/ERF domain	nicotine biosynthesis
MSTRG.108630	Nitab4.5_0000745g0170	0.8593	S-adenosylmethionine synthetase, central domain, S-adenosylmethionine synthetase, S-adenosylmethionine synthetase, C-terminal, S-adenosylmethionine synthetase, conserved site, S-adenosylmethionine synthetase superfamily, S-adenosylmethionine synthetase, N-terminal	nicotine biosynthesis	Yes
MSTRG.108630	Nitab4.5_0001029g0080	0.8588	CO dehydrogenase flavoprotein-like, FAD-binding, subdomain 2, FAD linked oxidase, N-terminal, FAD-binding, type 2, subdomain 1, FAD-binding, type 2	nicotine biosynthesis	Yes
MSTRG.108714	Nitab4.5_0000578g0090	0.8766	S-adenosylmethionine synthetase, central domain, S-adenosylmethionine synthetase, conserved site, S-adenosylmethionine synthetase, S-adenosylmethionine synthetase superfamily, S-adenosylmethionine synthetase, C-terminal, S-adenosylmethionine synthetase, N-terminal	nicotine biosynthesis
MSTRG.108714	Nitab4.5_0008624g0040	0.8579	S-adenosylmethionine synthetase, S-adenosylmethionine synthetase, N-terminal, S-adenosylmethionine synthetase superfamily, S-adenosylmethionine synthetase, conserved site, S-adenosylmethionine synthetase, C-terminal, S-adenosylmethionine synthetase, central domain	nicotine biosynthesis
MSTRG.108891	Nitab4.5_0001029g0080	0.8674	CO dehydrogenase flavoprotein-like, FAD-binding, subdomain 2, FAD linked oxidase, N-terminal, FAD-binding, type 2, subdomain 1, FAD-binding, type 2	nicotine biosynthesis
MSTRG.108891	Nitab4.5_0004665g0010	0.8532	S-adenosylmethionine synthetase, conserved site, S-adenosylmethionine synthetase, S-adenosylmethionine synthetase superfamily, S-adenosylmethionine synthetase, C-terminal, S-adenosylmethionine synthetase, central domain, S-adenosylmethionine synthetase, N-terminal	nicotine biosynthesis
MSTRG.108955	Nitab4.5_0003029g0020	0.8533	Berberine/berberine-like, CO dehydrogenase flavoprotein-like, FAD-binding, subdomain 2, FAD-binding, type 2, FAD linked oxidase, N-terminal, FAD-binding, type 2, subdomain 1	nicotine biosynthesis
MSTRG.108977	Nitab4.5_0000063g0120	0.8603	S-adenosylmethionine synthetase, conserved site, S-adenosylmethionine synthetase superfamily, S-adenosylmethionine synthetase, N-terminal, S-adenosylmethionine synthetase, S-adenosylmethionine synthetase, C-terminal, S-adenosylmethionine synthetase, central domain	nicotine biosynthesis	Yes
MSTRG.108977	Nitab4.5_0001029g0080	0.8689	CO dehydrogenase flavoprotein-like, FAD-binding, subdomain 2, FAD linked oxidase, N-terminal, FAD-binding, type 2, subdomain 1, FAD-binding, type 2	nicotine biosynthesis	Yes
MSTRG.109402	Nitab4.5_0001270g0090	0.9082	Alanine racemase/group IV decarboxylase, C-terminal, Ornithine decarboxylase, Orn/DAP/Arg decarboxylase 2, pyridoxal-phosphate binding site, Orn/DAP/Arg decarboxylase 2, N-terminal, Orn/DAP/Arg decarboxylase 2, C-terminal, Ornithine/DAP/Arg decarboxylase	nicotine biosynthesis
MSTRG.109461	Nitab4.5_0001965g0070	0.8517	S-adenosylmethionine decarboxylase, S-adenosylmethionine decarboxylase, conserved site, S-adenosylmethionine decarboxylase subgroup, S-adenosyl-l-methionine decarboxylase leader peptide, S-adenosylmethionine decarboxylase, core	nicotine biosynthesis	Yes
MSTRG.109470	Nitab4.5_0001965g0070	0.8732	S-adenosylmethionine decarboxylase, S-adenosylmethionine decarboxylase, conserved site, S-adenosylmethionine decarboxylase subgroup, S-adenosyl-l-methionine decarboxylase leader peptide, S-adenosylmethionine decarboxylase, core	nicotine biosynthesis	Yes
MSTRG.109513	Nitab4.5_0004665g0010	0.8703	S-adenosylmethionine synthetase, conserved site, S-adenosylmethionine synthetase, S-adenosylmethionine synthetase superfamily, S-adenosylmethionine synthetase, C-terminal, S-adenosylmethionine synthetase, central domain, S-adenosylmethionine synthetase, N-terminal	nicotine biosynthesis
MSTRG.109593	Nitab4.5_0000745g0170	0.8667	S-adenosylmethionine synthetase, central domain, S-adenosylmethionine synthetase, S-adenosylmethionine synthetase, C-terminal, S-adenosylmethionine synthetase, conserved site, S-adenosylmethionine synthetase superfamily, S-adenosylmethionine synthetase, N-terminal	nicotine biosynthesis	Yes
MSTRG.109593	Nitab4.5_0000884g0010	0.8638	NmrA-like, NAD(P)-binding domain	nicotine biosynthesis	Yes
MSTRG.109593	Nitab4.5_0001029g0080	0.9075	CO dehydrogenase flavoprotein-like, FAD-binding, subdomain 2, FAD linked oxidase, N-terminal, FAD-binding, type 2, subdomain 1, FAD-binding, type 2	nicotine biosynthesis	Yes
MSTRG.109593	Nitab4.5_0002338g0020	0.852	FAD binding domain, L-aspartate oxidase, Fumarate reductase/succinate dehydrogenase flavoprotein-like, C-terminal, Succinate dehydrogenase/fumarate reductase flavoprotein, catalytic domain, FAD-dependent pyridine nucleotide-disulphide oxidoreductase	nicotine biosynthesis	Yes
MSTRG.109593	Nitab4.5_0003090g0030	0.8538	AP2/ERF domain, DNA-binding domain	nicotine biosynthesis	Yes
MSTRG.109593	Nitab4.5_0006307g0010	0.8599	CO dehydrogenase flavoprotein-like, FAD-binding, subdomain 2, FAD-binding, type 2, FAD-binding, type 2, subdomain 1, FAD linked oxidase, N-terminal, Berberine/berberine-like	nicotine biosynthesis	Yes
MSTRG.109593	Nitab4.5_0011232g0010	0.8526	Spermidine/spermine synthases family, Putrescine N-methyltransferase	nicotine biosynthesis	Yes
MSTRG.109722	Nitab4.5_0004816g0010	0.8628	Nicotinate-nucleotide pyrophosphorylase, Quinolinate phosphoribosyl transferase, C-terminal, Quinolinate phosphoribosyl transferase, N-terminal, Aldolase-type TIM barrel, Nicotinate-nucleotide pyrophosphorylase/Putative pyrophosphorylase ModD	nicotine biosynthesis
MSTRG.10973	Nitab4.5_0000013g0380	0.8621	Spermidine/spermine synthases family	nicotine biosynthesis	Yes
MSTRG.10973	Nitab4.5_0000025g0290	0.8539	Copper amine oxidase, C-terminal, Copper amine oxidase, N2-terminal, Copper amine oxidase, N3-terminal, Copper amine oxidase, N-terminal, Copper amine oxidase, N2/N3-terminal, Copper amine oxidase	nicotine biosynthesis	Yes
MSTRG.10973	Nitab4.5_0000031g0370	0.9414	NAD(P)-binding domain, NmrA-like	nicotine biosynthesis	Yes
MSTRG.10973	Nitab4.5_0000316g0090	0.9831	CO dehydrogenase flavoprotein-like, FAD-binding, subdomain 2, FAD-binding, type 2, Berberine/berberine-like, FAD-binding, type 2, subdomain 1, FAD linked oxidase, N-terminal	nicotine biosynthesis	Yes
MSTRG.10973	Nitab4.5_0000745g0170	0.9041	S-adenosylmethionine synthetase, central domain, S-adenosylmethionine synthetase, S-adenosylmethionine synthetase, C-terminal, S-adenosylmethionine synthetase, conserved site, S-adenosylmethionine synthetase superfamily, S-adenosylmethionine synthetase, N-terminal	nicotine biosynthesis	Yes
MSTRG.10973	Nitab4.5_0000884g0010	0.9423	NmrA-like, NAD(P)-binding domain	nicotine biosynthesis	Yes
MSTRG.10973	Nitab4.5_0001029g0080	0.9369	CO dehydrogenase flavoprotein-like, FAD-binding, subdomain 2, FAD linked oxidase, N-terminal, FAD-binding, type 2, subdomain 1, FAD-binding, type 2	nicotine biosynthesis	Yes
MSTRG.10973	Nitab4.5_0001965g0070	0.8606	S-adenosylmethionine decarboxylase, S-adenosylmethionine decarboxylase, conserved site, S-adenosylmethionine decarboxylase subgroup, S-adenosyl-l-methionine decarboxylase leader peptide, S-adenosylmethionine decarboxylase, core	nicotine biosynthesis	Yes
MSTRG.10973	Nitab4.5_0002338g0020	0.9297	FAD binding domain, L-aspartate oxidase, Fumarate reductase/succinate dehydrogenase flavoprotein-like, C-terminal, Succinate dehydrogenase/fumarate reductase flavoprotein, catalytic domain, FAD-dependent pyridine nucleotide-disulphide oxidoreductase	nicotine biosynthesis	Yes
MSTRG.10973	Nitab4.5_0002522g0070	0.8805	Fe-S metabolism associated domain, SufE-like, Quinolinate synthetase A	nicotine biosynthesis	Yes
MSTRG.10973	Nitab4.5_0003090g0030	0.8955	AP2/ERF domain, DNA-binding domain	nicotine biosynthesis	Yes
MSTRG.10973	Nitab4.5_0005830g0010	0.8781	Succinate dehydrogenase/fumarate reductase flavoprotein, catalytic domain, Fumarate reductase/succinate dehydrogenase flavoprotein-like, C-terminal, FAD binding domain, L-aspartate oxidase, FAD-dependent pyridine nucleotide-disulphide oxidoreductase	nicotine biosynthesis	Yes
MSTRG.10973	Nitab4.5_0006307g0010	0.9426	CO dehydrogenase flavoprotein-like, FAD-binding, subdomain 2, FAD-binding, type 2, FAD-binding, type 2, subdomain 1, FAD linked oxidase, N-terminal, Berberine/berberine-like	nicotine biosynthesis	Yes
MSTRG.10973	Nitab4.5_0011232g0010	0.9289	Spermidine/spermine synthases family, Putrescine N-methyltransferase	nicotine biosynthesis	Yes
MSTRG.10973	Nitab4.5_0015055g0010	0.9463	DNA-binding domain, AP2/ERF domain	nicotine biosynthesis	Yes
MSTRG.10976	Nitab4.5_0010630g0010	0.8657	Orn/DAP/Arg decarboxylase 2, C-terminal, Orn/DAP/Arg decarboxylase 2, conserved site, Ornithine/DAP/Arg decarboxylase, Orn/DAP/Arg decarboxylase 2, pyridoxal-phosphate binding site, Orn/DAP/Arg decarboxylase 2, N-terminal, Arginine decarboxylase, Alanine racemase/group IV decarboxylase, C-terminal	nicotine biosynthesis
MSTRG.109783	Nitab4.5_0010630g0010	0.8854	Orn/DAP/Arg decarboxylase 2, C-terminal, Orn/DAP/Arg decarboxylase 2, conserved site, Ornithine/DAP/Arg decarboxylase, Orn/DAP/Arg decarboxylase 2, pyridoxal-phosphate binding site, Orn/DAP/Arg decarboxylase 2, N-terminal, Arginine decarboxylase, Alanine racemase/group IV decarboxylase, C-terminal	nicotine biosynthesis
MSTRG.109840	Nitab4.5_0003029g0020	0.8598	Berberine/berberine-like, CO dehydrogenase flavoprotein-like, FAD-binding, subdomain 2, FAD-binding, type 2, FAD linked oxidase, N-terminal, FAD-binding, type 2, subdomain 1	nicotine biosynthesis
MSTRG.110092	Nitab4.5_0000113g0030	0.8816	Spermidine/spermine synthases family	nicotine biosynthesis
MSTRG.110092	Nitab4.5_0000259g0260	0.8513	S-adenosylmethionine decarboxylase, core, S-adenosyl-l-methionine decarboxylase leader peptide, S-adenosylmethionine decarboxylase, S-adenosylmethionine decarboxylase subgroup, S-adenosylmethionine decarboxylase, conserved site	nicotine biosynthesis
MSTRG.110092	Nitab4.5_0003280g0010	0.9151	Alanine racemase/group IV decarboxylase, C-terminal, Orn/DAP/Arg decarboxylase 2, N-terminal, Ornithine/DAP/Arg decarboxylase, Orn/DAP/Arg decarboxylase 2, conserved site, Orn/DAP/Arg decarboxylase 2, pyridoxal-phosphate binding site, Orn/DAP/Arg decarboxylase 2, C-terminal, Ornithine decarboxylase	nicotine biosynthesis
MSTRG.110092	Nitab4.5_0010954g0020	0.8702	Spermidine/spermine synthases family	nicotine biosynthesis
MSTRG.110470	Nitab4.5_0000003g0720	0.9249	Copper amine oxidase, N2-terminal, Copper amine oxidase, Copper amine oxidase, C-terminal, Copper amine oxidase, N-terminal, Copper amine oxidase, N2/N3-terminal, Copper amine oxidase, N3-terminal	nicotine biosynthesis
MSTRG.111285	Nitab4.5_0004816g0010	0.9035	Nicotinate-nucleotide pyrophosphorylase, Quinolinate phosphoribosyl transferase, C-terminal, Quinolinate phosphoribosyl transferase, N-terminal, Aldolase-type TIM barrel, Nicotinate-nucleotide pyrophosphorylase/Putative pyrophosphorylase ModD	nicotine biosynthesis
MSTRG.111426	Nitab4.5_0001029g0080	0.9064	CO dehydrogenase flavoprotein-like, FAD-binding, subdomain 2, FAD linked oxidase, N-terminal, FAD-binding, type 2, subdomain 1, FAD-binding, type 2	nicotine biosynthesis	Yes
MSTRG.111807	Nitab4.5_0001270g0090	0.9082	Alanine racemase/group IV decarboxylase, C-terminal, Ornithine decarboxylase, Orn/DAP/Arg decarboxylase 2, pyridoxal-phosphate binding site, Orn/DAP/Arg decarboxylase 2, N-terminal, Orn/DAP/Arg decarboxylase 2, C-terminal, Ornithine/DAP/Arg decarboxylase	nicotine biosynthesis
MSTRG.111807	Nitab4.5_0002115g0020	0.8548	S-adenosylmethionine synthetase, S-adenosylmethionine synthetase, central domain, S-adenosylmethionine synthetase superfamily, S-adenosylmethionine synthetase, C-terminal, S-adenosylmethionine synthetase, conserved site, S-adenosylmethionine synthetase, N-terminal	nicotine biosynthesis
MSTRG.112145	Nitab4.5_0000063g0120	0.8656	S-adenosylmethionine synthetase, conserved site, S-adenosylmethionine synthetase superfamily, S-adenosylmethionine synthetase, N-terminal, S-adenosylmethionine synthetase, S-adenosylmethionine synthetase, C-terminal, S-adenosylmethionine synthetase, central domain	nicotine biosynthesis	Yes
MSTRG.112145	Nitab4.5_0001029g0080	0.8504	CO dehydrogenase flavoprotein-like, FAD-binding, subdomain 2, FAD linked oxidase, N-terminal, FAD-binding, type 2, subdomain 1, FAD-binding, type 2	nicotine biosynthesis	Yes
MSTRG.112552	Nitab4.5_0000013g0380	0.874	Spermidine/spermine synthases family	nicotine biosynthesis
MSTRG.112552	Nitab4.5_0000013g0390	0.8892	Spermidine/spermine synthases family	nicotine biosynthesis
MSTRG.112552	Nitab4.5_0000025g0290	0.8709	Copper amine oxidase, C-terminal, Copper amine oxidase, N2-terminal, Copper amine oxidase, N3-terminal, Copper amine oxidase, N-terminal, Copper amine oxidase, N2/N3-terminal, Copper amine oxidase	nicotine biosynthesis
MSTRG.112552	Nitab4.5_0000884g0010	0.8654	NmrA-like, NAD(P)-binding domain	nicotine biosynthesis
MSTRG.112552	Nitab4.5_0002338g0020	0.866	FAD binding domain, L-aspartate oxidase, Fumarate reductase/succinate dehydrogenase flavoprotein-like, C-terminal, Succinate dehydrogenase/fumarate reductase flavoprotein, catalytic domain, FAD-dependent pyridine nucleotide-disulphide oxidoreductase	nicotine biosynthesis
MSTRG.112552	Nitab4.5_0003090g0030	0.8859	AP2/ERF domain, DNA-binding domain	nicotine biosynthesis
MSTRG.112552	Nitab4.5_0003284g0010	0.874	Spermidine/spermine synthases family, Putrescine N-methyltransferase	nicotine biosynthesis
MSTRG.112552	Nitab4.5_0003284g0040	0.8592	Spermidine/spermine synthases family, Putrescine N-methyltransferase	nicotine biosynthesis
MSTRG.112552	Nitab4.5_0006307g0010	0.8589	CO dehydrogenase flavoprotein-like, FAD-binding, subdomain 2, FAD-binding, type 2, FAD-binding, type 2, subdomain 1, FAD linked oxidase, N-terminal, Berberine/berberine-like	nicotine biosynthesis
MSTRG.112552	Nitab4.5_0011232g0010	0.8619	Spermidine/spermine synthases family, Putrescine N-methyltransferase	nicotine biosynthesis
MSTRG.112916	Nitab4.5_0006589g0020	0.8778	S-adenosylmethionine synthetase superfamily, S-adenosylmethionine synthetase, S-adenosylmethionine synthetase, central domain, S-adenosylmethionine synthetase, N-terminal, S-adenosylmethionine synthetase, conserved site, S-adenosylmethionine synthetase, C-terminal	nicotine biosynthesis
MSTRG.113018	Nitab4.5_0000113g0030	0.8665	Spermidine/spermine synthases family	nicotine biosynthesis
MSTRG.113018	Nitab4.5_0001270g0090	0.8521	Alanine racemase/group IV decarboxylase, C-terminal, Ornithine decarboxylase, Orn/DAP/Arg decarboxylase 2, pyridoxal-phosphate binding site, Orn/DAP/Arg decarboxylase 2, N-terminal, Orn/DAP/Arg decarboxylase 2, C-terminal, Ornithine/DAP/Arg decarboxylase	nicotine biosynthesis
MSTRG.113018	Nitab4.5_0003280g0010	0.95	Alanine racemase/group IV decarboxylase, C-terminal, Orn/DAP/Arg decarboxylase 2, N-terminal, Ornithine/DAP/Arg decarboxylase, Orn/DAP/Arg decarboxylase 2, conserved site, Orn/DAP/Arg decarboxylase 2, pyridoxal-phosphate binding site, Orn/DAP/Arg decarboxylase 2, C-terminal, Ornithine decarboxylase	nicotine biosynthesis
MSTRG.113018	Nitab4.5_0010954g0020	0.8749	Spermidine/spermine synthases family	nicotine biosynthesis
MSTRG.113481	Nitab4.5_0000745g0170	0.9045	S-adenosylmethionine synthetase, central domain, S-adenosylmethionine synthetase, S-adenosylmethionine synthetase, C-terminal, S-adenosylmethionine synthetase, conserved site, S-adenosylmethionine synthetase superfamily, S-adenosylmethionine synthetase, N-terminal	nicotine biosynthesis
MSTRG.113481	Nitab4.5_0000895g0150	0.9177	S-adenosylmethionine synthetase superfamily, S-adenosylmethionine synthetase, conserved site, S-adenosylmethionine synthetase, central domain, S-adenosylmethionine synthetase, S-adenosylmethionine synthetase, C-terminal, S-adenosylmethionine synthetase, N-terminal	nicotine biosynthesis
MSTRG.113481	Nitab4.5_0004665g0010	0.8912	S-adenosylmethionine synthetase, conserved site, S-adenosylmethionine synthetase, S-adenosylmethionine synthetase superfamily, S-adenosylmethionine synthetase, C-terminal, S-adenosylmethionine synthetase, central domain, S-adenosylmethionine synthetase, N-terminal	nicotine biosynthesis
MSTRG.113481	Nitab4.5_0008312g0060	0.8527	S-adenosylmethionine synthetase, conserved site, S-adenosylmethionine synthetase, S-adenosylmethionine synthetase, C-terminal, S-adenosylmethionine synthetase superfamily, S-adenosylmethionine synthetase, central domain, S-adenosylmethionine synthetase, N-terminal	nicotine biosynthesis
MSTRG.113616	Nitab4.5_0000316g0090	0.8585	CO dehydrogenase flavoprotein-like, FAD-binding, subdomain 2, FAD-binding, type 2, Berberine/berberine-like, FAD-binding, type 2, subdomain 1, FAD linked oxidase, N-terminal	nicotine biosynthesis	Yes
MSTRG.113943	Nitab4.5_0000155g0200	0.8992	S-adenosylmethionine synthetase superfamily, S-adenosylmethionine synthetase, conserved site, S-adenosylmethionine synthetase, S-adenosylmethionine synthetase, N-terminal, S-adenosylmethionine synthetase, central domain, S-adenosylmethionine synthetase, C-terminal	nicotine biosynthesis
MSTRG.114089	Nitab4.5_0001270g0090	0.8728	Alanine racemase/group IV decarboxylase, C-terminal, Ornithine decarboxylase, Orn/DAP/Arg decarboxylase 2, pyridoxal-phosphate binding site, Orn/DAP/Arg decarboxylase 2, N-terminal, Orn/DAP/Arg decarboxylase 2, C-terminal, Ornithine/DAP/Arg decarboxylase	nicotine biosynthesis
MSTRG.114105	Nitab4.5_0004816g0010	0.9774	Nicotinate-nucleotide pyrophosphorylase, Quinolinate phosphoribosyl transferase, C-terminal, Quinolinate phosphoribosyl transferase, N-terminal, Aldolase-type TIM barrel, Nicotinate-nucleotide pyrophosphorylase/Putative pyrophosphorylase ModD	nicotine biosynthesis
MSTRG.114471	Nitab4.5_0004665g0010	0.8651	S-adenosylmethionine synthetase, conserved site, S-adenosylmethionine synthetase, S-adenosylmethionine synthetase superfamily, S-adenosylmethionine synthetase, C-terminal, S-adenosylmethionine synthetase, central domain, S-adenosylmethionine synthetase, N-terminal	nicotine biosynthesis
MSTRG.114473	Nitab4.5_0003029g0020	0.8657	Berberine/berberine-like, CO dehydrogenase flavoprotein-like, FAD-binding, subdomain 2, FAD-binding, type 2, FAD linked oxidase, N-terminal, FAD-binding, type 2, subdomain 1	nicotine biosynthesis
MSTRG.114577	Nitab4.5_0000578g0090	0.8519	S-adenosylmethionine synthetase, central domain, S-adenosylmethionine synthetase, conserved site, S-adenosylmethionine synthetase, S-adenosylmethionine synthetase superfamily, S-adenosylmethionine synthetase, C-terminal, S-adenosylmethionine synthetase, N-terminal	nicotine biosynthesis
MSTRG.114982	Nitab4.5_0000745g0170	0.8845	S-adenosylmethionine synthetase, central domain, S-adenosylmethionine synthetase, S-adenosylmethionine synthetase, C-terminal, S-adenosylmethionine synthetase, conserved site, S-adenosylmethionine synthetase superfamily, S-adenosylmethionine synthetase, N-terminal	nicotine biosynthesis
MSTRG.114982	Nitab4.5_0001029g0080	0.8552	CO dehydrogenase flavoprotein-like, FAD-binding, subdomain 2, FAD linked oxidase, N-terminal, FAD-binding, type 2, subdomain 1, FAD-binding, type 2	nicotine biosynthesis
MSTRG.114982	Nitab4.5_0004665g0010	0.8947	S-adenosylmethionine synthetase, conserved site, S-adenosylmethionine synthetase, S-adenosylmethionine synthetase superfamily, S-adenosylmethionine synthetase, C-terminal, S-adenosylmethionine synthetase, central domain, S-adenosylmethionine synthetase, N-terminal	nicotine biosynthesis
MSTRG.115005	Nitab4.5_0000003g0720	0.9141	Copper amine oxidase, N2-terminal, Copper amine oxidase, Copper amine oxidase, C-terminal, Copper amine oxidase, N-terminal, Copper amine oxidase, N2/N3-terminal, Copper amine oxidase, N3-terminal	nicotine biosynthesis
MSTRG.115098	Nitab4.5_0003524g0020	0.8614	S-adenosylmethionine synthetase superfamily, S-adenosylmethionine synthetase, S-adenosylmethionine synthetase, N-terminal, S-adenosylmethionine synthetase, conserved site, S-adenosylmethionine synthetase, central domain, S-adenosylmethionine synthetase, C-terminal	nicotine biosynthesis
MSTRG.115330	Nitab4.5_0000742g0010	0.8806	Quinolinate phosphoribosyl transferase, C-terminal, Quinolinate phosphoribosyl transferase, N-terminal, Nicotinate-nucleotide pyrophosphorylase, Aldolase-type TIM barrel	nicotine biosynthesis
MSTRG.115547	Nitab4.5_0000034g0230	0.8505	Spermidine/spermine synthases family	nicotine biosynthesis
MSTRG.115547	Nitab4.5_0000113g0030	0.8769	Spermidine/spermine synthases family	nicotine biosynthesis
MSTRG.115547	Nitab4.5_0003280g0010	0.8844	Alanine racemase/group IV decarboxylase, C-terminal, Orn/DAP/Arg decarboxylase 2, N-terminal, Ornithine/DAP/Arg decarboxylase, Orn/DAP/Arg decarboxylase 2, conserved site, Orn/DAP/Arg decarboxylase 2, pyridoxal-phosphate binding site, Orn/DAP/Arg decarboxylase 2, C-terminal, Ornithine decarboxylase	nicotine biosynthesis
MSTRG.115547	Nitab4.5_0010954g0020	0.858	Spermidine/spermine synthases family	nicotine biosynthesis
MSTRG.115701	Nitab4.5_0000003g0720	0.8627	Copper amine oxidase, N2-terminal, Copper amine oxidase, Copper amine oxidase, C-terminal, Copper amine oxidase, N-terminal, Copper amine oxidase, N2/N3-terminal, Copper amine oxidase, N3-terminal	nicotine biosynthesis
MSTRG.115872	Nitab4.5_0004816g0010	0.9774	Nicotinate-nucleotide pyrophosphorylase, Quinolinate phosphoribosyl transferase, C-terminal, Quinolinate phosphoribosyl transferase, N-terminal, Aldolase-type TIM barrel, Nicotinate-nucleotide pyrophosphorylase/Putative pyrophosphorylase ModD	nicotine biosynthesis
MSTRG.11594	Nitab4.5_0000316g0090	0.8565	CO dehydrogenase flavoprotein-like, FAD-binding, subdomain 2, FAD-binding, type 2, Berberine/berberine-like, FAD-binding, type 2, subdomain 1, FAD linked oxidase, N-terminal	nicotine biosynthesis
MSTRG.116259	Nitab4.5_0000013g0380	0.8802	Spermidine/spermine synthases family	nicotine biosynthesis	Yes
MSTRG.116259	Nitab4.5_0000025g0290	0.8758	Copper amine oxidase, C-terminal, Copper amine oxidase, N2-terminal, Copper amine oxidase, N3-terminal, Copper amine oxidase, N-terminal, Copper amine oxidase, N2/N3-terminal, Copper amine oxidase	nicotine biosynthesis	Yes
MSTRG.116259	Nitab4.5_0000031g0370	0.93	NAD(P)-binding domain, NmrA-like	nicotine biosynthesis	Yes
MSTRG.116259	Nitab4.5_0000316g0090	0.9378	CO dehydrogenase flavoprotein-like, FAD-binding, subdomain 2, FAD-binding, type 2, Berberine/berberine-like, FAD-binding, type 2, subdomain 1, FAD linked oxidase, N-terminal	nicotine biosynthesis	Yes
MSTRG.116259	Nitab4.5_0000884g0010	0.9309	NmrA-like, NAD(P)-binding domain	nicotine biosynthesis	Yes
MSTRG.116259	Nitab4.5_0001029g0080	0.8746	CO dehydrogenase flavoprotein-like, FAD-binding, subdomain 2, FAD linked oxidase, N-terminal, FAD-binding, type 2, subdomain 1, FAD-binding, type 2	nicotine biosynthesis	Yes
MSTRG.116259	Nitab4.5_0002338g0020	0.9228	FAD binding domain, L-aspartate oxidase, Fumarate reductase/succinate dehydrogenase flavoprotein-like, C-terminal, Succinate dehydrogenase/fumarate reductase flavoprotein, catalytic domain, FAD-dependent pyridine nucleotide-disulphide oxidoreductase	nicotine biosynthesis	Yes
MSTRG.116259	Nitab4.5_0003090g0030	0.8981	AP2/ERF domain, DNA-binding domain	nicotine biosynthesis	Yes
MSTRG.116259	Nitab4.5_0003284g0040	0.8654	Spermidine/spermine synthases family, Putrescine N-methyltransferase	nicotine biosynthesis	Yes
MSTRG.116259	Nitab4.5_0005830g0010	0.9125	Succinate dehydrogenase/fumarate reductase flavoprotein, catalytic domain, Fumarate reductase/succinate dehydrogenase flavoprotein-like, C-terminal, FAD binding domain, L-aspartate oxidase, FAD-dependent pyridine nucleotide-disulphide oxidoreductase	nicotine biosynthesis	Yes
MSTRG.116259	Nitab4.5_0006307g0010	0.9508	CO dehydrogenase flavoprotein-like, FAD-binding, subdomain 2, FAD-binding, type 2, FAD-binding, type 2, subdomain 1, FAD linked oxidase, N-terminal, Berberine/berberine-like	nicotine biosynthesis	Yes
MSTRG.116259	Nitab4.5_0011232g0010	0.9234	Spermidine/spermine synthases family, Putrescine N-methyltransferase	nicotine biosynthesis	Yes
MSTRG.116259	Nitab4.5_0015055g0010	0.9403	DNA-binding domain, AP2/ERF domain	nicotine biosynthesis	Yes
MSTRG.116325	Nitab4.5_0000003g0720	0.9026	Copper amine oxidase, N2-terminal, Copper amine oxidase, Copper amine oxidase, C-terminal, Copper amine oxidase, N-terminal, Copper amine oxidase, N2/N3-terminal, Copper amine oxidase, N3-terminal	nicotine biosynthesis
MSTRG.116590	Nitab4.5_0001965g0070	0.9038	S-adenosylmethionine decarboxylase, S-adenosylmethionine decarboxylase, conserved site, S-adenosylmethionine decarboxylase subgroup, S-adenosyl-l-methionine decarboxylase leader peptide, S-adenosylmethionine decarboxylase, core	nicotine biosynthesis	Yes
MSTRG.11675	Nitab4.5_0000003g0720	0.912	Copper amine oxidase, N2-terminal, Copper amine oxidase, Copper amine oxidase, C-terminal, Copper amine oxidase, N-terminal, Copper amine oxidase, N2/N3-terminal, Copper amine oxidase, N3-terminal	nicotine biosynthesis
MSTRG.116997	Nitab4.5_0000113g0030	0.8983	Spermidine/spermine synthases family	nicotine biosynthesis
MSTRG.116997	Nitab4.5_0000259g0260	0.9133	S-adenosylmethionine decarboxylase, core, S-adenosyl-l-methionine decarboxylase leader peptide, S-adenosylmethionine decarboxylase, S-adenosylmethionine decarboxylase subgroup, S-adenosylmethionine decarboxylase, conserved site	nicotine biosynthesis
MSTRG.116997	Nitab4.5_0003280g0010	0.9118	Alanine racemase/group IV decarboxylase, C-terminal, Orn/DAP/Arg decarboxylase 2, N-terminal, Ornithine/DAP/Arg decarboxylase, Orn/DAP/Arg decarboxylase 2, conserved site, Orn/DAP/Arg decarboxylase 2, pyridoxal-phosphate binding site, Orn/DAP/Arg decarboxylase 2, C-terminal, Ornithine decarboxylase	nicotine biosynthesis
MSTRG.116997	Nitab4.5_0010954g0020	0.8917	Spermidine/spermine synthases family	nicotine biosynthesis
MSTRG.117119	Nitab4.5_0000031g0370	0.8815	NAD(P)-binding domain, NmrA-like	nicotine biosynthesis	Yes
MSTRG.117119	Nitab4.5_0000316g0090	0.9349	CO dehydrogenase flavoprotein-like, FAD-binding, subdomain 2, FAD-binding, type 2, Berberine/berberine-like, FAD-binding, type 2, subdomain 1, FAD linked oxidase, N-terminal	nicotine biosynthesis	Yes
MSTRG.117119	Nitab4.5_0000745g0170	0.8925	S-adenosylmethionine synthetase, central domain, S-adenosylmethionine synthetase, S-adenosylmethionine synthetase, C-terminal, S-adenosylmethionine synthetase, conserved site, S-adenosylmethionine synthetase superfamily, S-adenosylmethionine synthetase, N-terminal	nicotine biosynthesis	Yes
MSTRG.117119	Nitab4.5_0000884g0010	0.8824	NmrA-like, NAD(P)-binding domain	nicotine biosynthesis	Yes
MSTRG.117119	Nitab4.5_0001029g0080	0.9637	CO dehydrogenase flavoprotein-like, FAD-binding, subdomain 2, FAD linked oxidase, N-terminal, FAD-binding, type 2, subdomain 1, FAD-binding, type 2	nicotine biosynthesis	Yes
MSTRG.117119	Nitab4.5_0002338g0020	0.8635	FAD binding domain, L-aspartate oxidase, Fumarate reductase/succinate dehydrogenase flavoprotein-like, C-terminal, Succinate dehydrogenase/fumarate reductase flavoprotein, catalytic domain, FAD-dependent pyridine nucleotide-disulphide oxidoreductase	nicotine biosynthesis	Yes
MSTRG.117119	Nitab4.5_0006307g0010	0.8795	CO dehydrogenase flavoprotein-like, FAD-binding, subdomain 2, FAD-binding, type 2, FAD-binding, type 2, subdomain 1, FAD linked oxidase, N-terminal, Berberine/berberine-like	nicotine biosynthesis	Yes
MSTRG.117119	Nitab4.5_0011232g0010	0.8628	Spermidine/spermine synthases family, Putrescine N-methyltransferase	nicotine biosynthesis	Yes
MSTRG.117119	Nitab4.5_0015055g0010	0.8866	DNA-binding domain, AP2/ERF domain	nicotine biosynthesis	Yes
MSTRG.117120	Nitab4.5_0003029g0020	0.8889	Berberine/berberine-like, CO dehydrogenase flavoprotein-like, FAD-binding, subdomain 2, FAD-binding, type 2, FAD linked oxidase, N-terminal, FAD-binding, type 2, subdomain 1	nicotine biosynthesis
MSTRG.117187	Nitab4.5_0003524g0020	0.8557	S-adenosylmethionine synthetase superfamily, S-adenosylmethionine synthetase, S-adenosylmethionine synthetase, N-terminal, S-adenosylmethionine synthetase, conserved site, S-adenosylmethionine synthetase, central domain, S-adenosylmethionine synthetase, C-terminal	nicotine biosynthesis
MSTRG.117377	Nitab4.5_0000003g0720	0.9099	Copper amine oxidase, N2-terminal, Copper amine oxidase, Copper amine oxidase, C-terminal, Copper amine oxidase, N-terminal, Copper amine oxidase, N2/N3-terminal, Copper amine oxidase, N3-terminal	nicotine biosynthesis
MSTRG.1176	Nitab4.5_0000013g0380	0.8956	Spermidine/spermine synthases family	nicotine biosynthesis	Yes
MSTRG.1176	Nitab4.5_0000013g0390	0.8638	Spermidine/spermine synthases family	nicotine biosynthesis
MSTRG.1176	Nitab4.5_0000025g0290	0.8832	Copper amine oxidase, C-terminal, Copper amine oxidase, N2-terminal, Copper amine oxidase, N3-terminal, Copper amine oxidase, N-terminal, Copper amine oxidase, N2/N3-terminal, Copper amine oxidase	nicotine biosynthesis	Yes
MSTRG.1176	Nitab4.5_0000031g0370	0.912	NAD(P)-binding domain, NmrA-like	nicotine biosynthesis	Yes
MSTRG.1176	Nitab4.5_0000316g0090	0.8987	CO dehydrogenase flavoprotein-like, FAD-binding, subdomain 2, FAD-binding, type 2, Berberine/berberine-like, FAD-binding, type 2, subdomain 1, FAD linked oxidase, N-terminal	nicotine biosynthesis	Yes
MSTRG.1176	Nitab4.5_0000884g0010	0.9251	NmrA-like, NAD(P)-binding domain	nicotine biosynthesis	Yes
MSTRG.1176	Nitab4.5_0001029g0080	0.8866	CO dehydrogenase flavoprotein-like, FAD-binding, subdomain 2, FAD linked oxidase, N-terminal, FAD-binding, type 2, subdomain 1, FAD-binding, type 2	nicotine biosynthesis	Yes
MSTRG.1176	Nitab4.5_0002338g0020	0.9181	FAD binding domain, L-aspartate oxidase, Fumarate reductase/succinate dehydrogenase flavoprotein-like, C-terminal, Succinate dehydrogenase/fumarate reductase flavoprotein, catalytic domain, FAD-dependent pyridine nucleotide-disulphide oxidoreductase	nicotine biosynthesis	Yes
MSTRG.1176	Nitab4.5_0003090g0030	0.9152	AP2/ERF domain, DNA-binding domain	nicotine biosynthesis	Yes
MSTRG.1176	Nitab4.5_0003284g0010	0.8734	Spermidine/spermine synthases family, Putrescine N-methyltransferase	nicotine biosynthesis	Yes
MSTRG.1176	Nitab4.5_0003284g0040	0.8716	Spermidine/spermine synthases family, Putrescine N-methyltransferase	nicotine biosynthesis	Yes
MSTRG.1176	Nitab4.5_0005830g0010	0.8728	Succinate dehydrogenase/fumarate reductase flavoprotein, catalytic domain, Fumarate reductase/succinate dehydrogenase flavoprotein-like, C-terminal, FAD binding domain, L-aspartate oxidase, FAD-dependent pyridine nucleotide-disulphide oxidoreductase	nicotine biosynthesis	Yes
MSTRG.1176	Nitab4.5_0006307g0010	0.9168	CO dehydrogenase flavoprotein-like, FAD-binding, subdomain 2, FAD-binding, type 2, FAD-binding, type 2, subdomain 1, FAD linked oxidase, N-terminal, Berberine/berberine-like	nicotine biosynthesis	Yes
MSTRG.1176	Nitab4.5_0011232g0010	0.9155	Spermidine/spermine synthases family, Putrescine N-methyltransferase	nicotine biosynthesis	Yes
MSTRG.1176	Nitab4.5_0015055g0010	0.9084	DNA-binding domain, AP2/ERF domain	nicotine biosynthesis	Yes
MSTRG.118064	Nitab4.5_0001029g0080	0.8772	CO dehydrogenase flavoprotein-like, FAD-binding, subdomain 2, FAD linked oxidase, N-terminal, FAD-binding, type 2, subdomain 1, FAD-binding, type 2	nicotine biosynthesis	Yes
MSTRG.118064	Nitab4.5_0003029g0030	0.8807	FAD-binding, type 2, subdomain 1, FAD linked oxidase, N-terminal, FAD-binding, type 2, Berberine/berberine-like	nicotine biosynthesis
MSTRG.118066	Nitab4.5_0003029g0030	0.8713	FAD-binding, type 2, subdomain 1, FAD linked oxidase, N-terminal, FAD-binding, type 2, Berberine/berberine-like	nicotine biosynthesis
MSTRG.118268	Nitab4.5_0000578g0090	0.8533	S-adenosylmethionine synthetase, central domain, S-adenosylmethionine synthetase, conserved site, S-adenosylmethionine synthetase, S-adenosylmethionine synthetase superfamily, S-adenosylmethionine synthetase, C-terminal, S-adenosylmethionine synthetase, N-terminal	nicotine biosynthesis
MSTRG.118758	Nitab4.5_0000155g0200	0.8721	S-adenosylmethionine synthetase superfamily, S-adenosylmethionine synthetase, conserved site, S-adenosylmethionine synthetase, S-adenosylmethionine synthetase, N-terminal, S-adenosylmethionine synthetase, central domain, S-adenosylmethionine synthetase, C-terminal	nicotine biosynthesis
MSTRG.119132	Nitab4.5_0000063g0120	0.8763	S-adenosylmethionine synthetase, conserved site, S-adenosylmethionine synthetase superfamily, S-adenosylmethionine synthetase, N-terminal, S-adenosylmethionine synthetase, S-adenosylmethionine synthetase, C-terminal, S-adenosylmethionine synthetase, central domain	nicotine biosynthesis	Yes
MSTRG.119132	Nitab4.5_0000063g0170	0.8535	similar to S-adenosylmethionine synthase 2	nicotine biosynthesis	Yes
MSTRG.119132	Nitab4.5_0000814g0090	0.8772	S-adenosylmethionine synthetase superfamily, S-adenosylmethionine synthetase, N-terminal, S-adenosylmethionine synthetase, C-terminal, S-adenosylmethionine synthetase, S-adenosylmethionine synthetase, conserved site, S-adenosylmethionine synthetase, central domain	nicotine biosynthesis
MSTRG.119132	Nitab4.5_0004665g0010	0.9025	S-adenosylmethionine synthetase, conserved site, S-adenosylmethionine synthetase, S-adenosylmethionine synthetase superfamily, S-adenosylmethionine synthetase, C-terminal, S-adenosylmethionine synthetase, central domain, S-adenosylmethionine synthetase, N-terminal	nicotine biosynthesis
MSTRG.119132	Nitab4.5_0008312g0060	0.9189	S-adenosylmethionine synthetase, conserved site, S-adenosylmethionine synthetase, S-adenosylmethionine synthetase, C-terminal, S-adenosylmethionine synthetase superfamily, S-adenosylmethionine synthetase, central domain, S-adenosylmethionine synthetase, N-terminal	nicotine biosynthesis
MSTRG.11921	Nitab4.5_0000983g0060	0.8851	Copper amine oxidase, Copper amine oxidase, N2/N3-terminal, Copper amine oxidase, N2-terminal, Copper amine oxidase, N3-terminal, Copper amine oxidase, C-terminal, Copper amine oxidase, N-terminal	nicotine biosynthesis
MSTRG.119517	Nitab4.5_0000013g0380	0.8893	Spermidine/spermine synthases family	nicotine biosynthesis	Yes
MSTRG.119517	Nitab4.5_0000013g0390	0.8824	Spermidine/spermine synthases family	nicotine biosynthesis
MSTRG.119517	Nitab4.5_0000025g0290	0.8835	Copper amine oxidase, C-terminal, Copper amine oxidase, N2-terminal, Copper amine oxidase, N3-terminal, Copper amine oxidase, N-terminal, Copper amine oxidase, N2/N3-terminal, Copper amine oxidase	nicotine biosynthesis	Yes
MSTRG.119517	Nitab4.5_0000031g0370	0.8766	NAD(P)-binding domain, NmrA-like	nicotine biosynthesis	Yes
MSTRG.119517	Nitab4.5_0000884g0010	0.8907	NmrA-like, NAD(P)-binding domain	nicotine biosynthesis	Yes
MSTRG.119517	Nitab4.5_0002338g0020	0.8935	FAD binding domain, L-aspartate oxidase, Fumarate reductase/succinate dehydrogenase flavoprotein-like, C-terminal, Succinate dehydrogenase/fumarate reductase flavoprotein, catalytic domain, FAD-dependent pyridine nucleotide-disulphide oxidoreductase	nicotine biosynthesis	Yes
MSTRG.119517	Nitab4.5_0003090g0030	0.9048	AP2/ERF domain, DNA-binding domain	nicotine biosynthesis	Yes
MSTRG.119517	Nitab4.5_0003284g0010	0.882	Spermidine/spermine synthases family, Putrescine N-methyltransferase	nicotine biosynthesis	Yes
MSTRG.119517	Nitab4.5_0003284g0040	0.8758	Spermidine/spermine synthases family, Putrescine N-methyltransferase	nicotine biosynthesis	Yes
MSTRG.119517	Nitab4.5_0005830g0010	0.8569	Succinate dehydrogenase/fumarate reductase flavoprotein, catalytic domain, Fumarate reductase/succinate dehydrogenase flavoprotein-like, C-terminal, FAD binding domain, L-aspartate oxidase, FAD-dependent pyridine nucleotide-disulphide oxidoreductase	nicotine biosynthesis	Yes
MSTRG.119517	Nitab4.5_0006307g0010	0.8829	CO dehydrogenase flavoprotein-like, FAD-binding, subdomain 2, FAD-binding, type 2, FAD-binding, type 2, subdomain 1, FAD linked oxidase, N-terminal, Berberine/berberine-like	nicotine biosynthesis	Yes
MSTRG.119517	Nitab4.5_0011232g0010	0.8879	Spermidine/spermine synthases family, Putrescine N-methyltransferase	nicotine biosynthesis	Yes
MSTRG.119517	Nitab4.5_0015055g0010	0.8692	DNA-binding domain, AP2/ERF domain	nicotine biosynthesis	Yes
MSTRG.11953	Nitab4.5_0000063g0120	0.879	S-adenosylmethionine synthetase, conserved site, S-adenosylmethionine synthetase superfamily, S-adenosylmethionine synthetase, N-terminal, S-adenosylmethionine synthetase, S-adenosylmethionine synthetase, C-terminal, S-adenosylmethionine synthetase, central domain	nicotine biosynthesis	Yes
MSTRG.11953	Nitab4.5_0001029g0080	0.9016	CO dehydrogenase flavoprotein-like, FAD-binding, subdomain 2, FAD linked oxidase, N-terminal, FAD-binding, type 2, subdomain 1, FAD-binding, type 2	nicotine biosynthesis	Yes
MSTRG.119553	Nitab4.5_0000063g0120	0.8534	S-adenosylmethionine synthetase, conserved site, S-adenosylmethionine synthetase superfamily, S-adenosylmethionine synthetase, N-terminal, S-adenosylmethionine synthetase, S-adenosylmethionine synthetase, C-terminal, S-adenosylmethionine synthetase, central domain	nicotine biosynthesis	Yes
MSTRG.119553	Nitab4.5_0000316g0090	0.8875	CO dehydrogenase flavoprotein-like, FAD-binding, subdomain 2, FAD-binding, type 2, Berberine/berberine-like, FAD-binding, type 2, subdomain 1, FAD linked oxidase, N-terminal	nicotine biosynthesis	Yes
MSTRG.119553	Nitab4.5_0000745g0170	0.9411	S-adenosylmethionine synthetase, central domain, S-adenosylmethionine synthetase, S-adenosylmethionine synthetase, C-terminal, S-adenosylmethionine synthetase, conserved site, S-adenosylmethionine synthetase superfamily, S-adenosylmethionine synthetase, N-terminal	nicotine biosynthesis	Yes
MSTRG.119553	Nitab4.5_0001029g0080	0.9215	CO dehydrogenase flavoprotein-like, FAD-binding, subdomain 2, FAD linked oxidase, N-terminal, FAD-binding, type 2, subdomain 1, FAD-binding, type 2	nicotine biosynthesis	Yes
MSTRG.119553	Nitab4.5_0001965g0070	0.878	S-adenosylmethionine decarboxylase, S-adenosylmethionine decarboxylase, conserved site, S-adenosylmethionine decarboxylase subgroup, S-adenosyl-l-methionine decarboxylase leader peptide, S-adenosylmethionine decarboxylase, core	nicotine biosynthesis	Yes
MSTRG.119851	Nitab4.5_0000003g0720	0.8976	Copper amine oxidase, N2-terminal, Copper amine oxidase, Copper amine oxidase, C-terminal, Copper amine oxidase, N-terminal, Copper amine oxidase, N2/N3-terminal, Copper amine oxidase, N3-terminal	nicotine biosynthesis
MSTRG.120072	Nitab4.5_0000031g0370	0.8691	NAD(P)-binding domain, NmrA-like	nicotine biosynthesis	Yes
MSTRG.120072	Nitab4.5_0000063g0120	0.8867	S-adenosylmethionine synthetase, conserved site, S-adenosylmethionine synthetase superfamily, S-adenosylmethionine synthetase, N-terminal, S-adenosylmethionine synthetase, S-adenosylmethionine synthetase, C-terminal, S-adenosylmethionine synthetase, central domain	nicotine biosynthesis	Yes
MSTRG.120072	Nitab4.5_0000316g0090	0.9062	CO dehydrogenase flavoprotein-like, FAD-binding, subdomain 2, FAD-binding, type 2, Berberine/berberine-like, FAD-binding, type 2, subdomain 1, FAD linked oxidase, N-terminal	nicotine biosynthesis	Yes
MSTRG.120072	Nitab4.5_0000745g0170	0.9346	S-adenosylmethionine synthetase, central domain, S-adenosylmethionine synthetase, S-adenosylmethionine synthetase, C-terminal, S-adenosylmethionine synthetase, conserved site, S-adenosylmethionine synthetase superfamily, S-adenosylmethionine synthetase, N-terminal	nicotine biosynthesis	Yes
MSTRG.120072	Nitab4.5_0000884g0010	0.8822	NmrA-like, NAD(P)-binding domain	nicotine biosynthesis	Yes
MSTRG.120072	Nitab4.5_0001029g0080	0.9629	CO dehydrogenase flavoprotein-like, FAD-binding, subdomain 2, FAD linked oxidase, N-terminal, FAD-binding, type 2, subdomain 1, FAD-binding, type 2	nicotine biosynthesis	Yes
MSTRG.120072	Nitab4.5_0002338g0020	0.8643	FAD binding domain, L-aspartate oxidase, Fumarate reductase/succinate dehydrogenase flavoprotein-like, C-terminal, Succinate dehydrogenase/fumarate reductase flavoprotein, catalytic domain, FAD-dependent pyridine nucleotide-disulphide oxidoreductase	nicotine biosynthesis	Yes
MSTRG.120072	Nitab4.5_0006307g0010	0.8837	CO dehydrogenase flavoprotein-like, FAD-binding, subdomain 2, FAD-binding, type 2, FAD-binding, type 2, subdomain 1, FAD linked oxidase, N-terminal, Berberine/berberine-like	nicotine biosynthesis	Yes
MSTRG.120072	Nitab4.5_0011232g0010	0.865	Spermidine/spermine synthases family, Putrescine N-methyltransferase	nicotine biosynthesis	Yes
MSTRG.120072	Nitab4.5_0015055g0010	0.8706	DNA-binding domain, AP2/ERF domain	nicotine biosynthesis	Yes
MSTRG.120225	Nitab4.5_0000113g0030	0.8597	Spermidine/spermine synthases family	nicotine biosynthesis
MSTRG.120225	Nitab4.5_0003280g0010	0.9281	Alanine racemase/group IV decarboxylase, C-terminal, Orn/DAP/Arg decarboxylase 2, N-terminal, Ornithine/DAP/Arg decarboxylase, Orn/DAP/Arg decarboxylase 2, conserved site, Orn/DAP/Arg decarboxylase 2, pyridoxal-phosphate binding site, Orn/DAP/Arg decarboxylase 2, C-terminal, Ornithine decarboxylase	nicotine biosynthesis
MSTRG.120225	Nitab4.5_0010954g0020	0.8787	Spermidine/spermine synthases family	nicotine biosynthesis
MSTRG.120263	Nitab4.5_0000031g0370	0.8863	NAD(P)-binding domain, NmrA-like	nicotine biosynthesis	Yes
MSTRG.120263	Nitab4.5_0000316g0090	0.9125	CO dehydrogenase flavoprotein-like, FAD-binding, subdomain 2, FAD-binding, type 2, Berberine/berberine-like, FAD-binding, type 2, subdomain 1, FAD linked oxidase, N-terminal	nicotine biosynthesis	Yes
MSTRG.120263	Nitab4.5_0000884g0010	0.8934	NmrA-like, NAD(P)-binding domain	nicotine biosynthesis	Yes
MSTRG.120263	Nitab4.5_0001029g0080	0.9256	CO dehydrogenase flavoprotein-like, FAD-binding, subdomain 2, FAD linked oxidase, N-terminal, FAD-binding, type 2, subdomain 1, FAD-binding, type 2	nicotine biosynthesis	Yes
MSTRG.120263	Nitab4.5_0002338g0020	0.883	FAD binding domain, L-aspartate oxidase, Fumarate reductase/succinate dehydrogenase flavoprotein-like, C-terminal, Succinate dehydrogenase/fumarate reductase flavoprotein, catalytic domain, FAD-dependent pyridine nucleotide-disulphide oxidoreductase	nicotine biosynthesis	Yes
MSTRG.120263	Nitab4.5_0003090g0030	0.8649	AP2/ERF domain, DNA-binding domain	nicotine biosynthesis	Yes
MSTRG.120263	Nitab4.5_0006307g0010	0.9115	CO dehydrogenase flavoprotein-like, FAD-binding, subdomain 2, FAD-binding, type 2, FAD-binding, type 2, subdomain 1, FAD linked oxidase, N-terminal, Berberine/berberine-like	nicotine biosynthesis	Yes
MSTRG.120263	Nitab4.5_0011232g0010	0.8824	Spermidine/spermine synthases family, Putrescine N-methyltransferase	nicotine biosynthesis	Yes
MSTRG.120263	Nitab4.5_0015055g0010	0.8885	DNA-binding domain, AP2/ERF domain	nicotine biosynthesis	Yes
MSTRG.120358	Nitab4.5_0000013g0380	0.9654	Spermidine/spermine synthases family	nicotine biosynthesis
MSTRG.120358	Nitab4.5_0000013g0390	0.9971	Spermidine/spermine synthases family	nicotine biosynthesis
MSTRG.120358	Nitab4.5_0000025g0290	0.958	Copper amine oxidase, C-terminal, Copper amine oxidase, N2-terminal, Copper amine oxidase, N3-terminal, Copper amine oxidase, N-terminal, Copper amine oxidase, N2/N3-terminal, Copper amine oxidase	nicotine biosynthesis
MSTRG.120358	Nitab4.5_0000031g0370	0.8871	NAD(P)-binding domain, NmrA-like	nicotine biosynthesis
MSTRG.120358	Nitab4.5_0000884g0010	0.8956	NmrA-like, NAD(P)-binding domain	nicotine biosynthesis
MSTRG.120358	Nitab4.5_0002338g0020	0.9106	FAD binding domain, L-aspartate oxidase, Fumarate reductase/succinate dehydrogenase flavoprotein-like, C-terminal, Succinate dehydrogenase/fumarate reductase flavoprotein, catalytic domain, FAD-dependent pyridine nucleotide-disulphide oxidoreductase	nicotine biosynthesis
MSTRG.120358	Nitab4.5_0003090g0030	0.9471	AP2/ERF domain, DNA-binding domain	nicotine biosynthesis
MSTRG.120358	Nitab4.5_0003284g0010	0.9875	Spermidine/spermine synthases family, Putrescine N-methyltransferase	nicotine biosynthesis
MSTRG.120358	Nitab4.5_0003284g0040	0.9694	Spermidine/spermine synthases family, Putrescine N-methyltransferase	nicotine biosynthesis
MSTRG.120358	Nitab4.5_0005830g0010	0.9169	Succinate dehydrogenase/fumarate reductase flavoprotein, catalytic domain, Fumarate reductase/succinate dehydrogenase flavoprotein-like, C-terminal, FAD binding domain, L-aspartate oxidase, FAD-dependent pyridine nucleotide-disulphide oxidoreductase	nicotine biosynthesis
MSTRG.120358	Nitab4.5_0006307g0010	0.8725	CO dehydrogenase flavoprotein-like, FAD-binding, subdomain 2, FAD-binding, type 2, FAD-binding, type 2, subdomain 1, FAD linked oxidase, N-terminal, Berberine/berberine-like	nicotine biosynthesis
MSTRG.120358	Nitab4.5_0011232g0010	0.9106	Spermidine/spermine synthases family, Putrescine N-methyltransferase	nicotine biosynthesis
MSTRG.120358	Nitab4.5_0015055g0010	0.873	DNA-binding domain, AP2/ERF domain	nicotine biosynthesis
MSTRG.120575	Nitab4.5_0000063g0120	0.8747	S-adenosylmethionine synthetase, conserved site, S-adenosylmethionine synthetase superfamily, S-adenosylmethionine synthetase, N-terminal, S-adenosylmethionine synthetase, S-adenosylmethionine synthetase, C-terminal, S-adenosylmethionine synthetase, central domain	nicotine biosynthesis
MSTRG.120575	Nitab4.5_0000745g0170	0.8859	S-adenosylmethionine synthetase, central domain, S-adenosylmethionine synthetase, S-adenosylmethionine synthetase, C-terminal, S-adenosylmethionine synthetase, conserved site, S-adenosylmethionine synthetase superfamily, S-adenosylmethionine synthetase, N-terminal	nicotine biosynthesis
MSTRG.120575	Nitab4.5_0001029g0080	0.9087	CO dehydrogenase flavoprotein-like, FAD-binding, subdomain 2, FAD linked oxidase, N-terminal, FAD-binding, type 2, subdomain 1, FAD-binding, type 2	nicotine biosynthesis
MSTRG.120734	Nitab4.5_0000316g0090	0.9004	CO dehydrogenase flavoprotein-like, FAD-binding, subdomain 2, FAD-binding, type 2, Berberine/berberine-like, FAD-binding, type 2, subdomain 1, FAD linked oxidase, N-terminal	nicotine biosynthesis	Yes
MSTRG.120734	Nitab4.5_0000745g0170	0.856	S-adenosylmethionine synthetase, central domain, S-adenosylmethionine synthetase, S-adenosylmethionine synthetase, C-terminal, S-adenosylmethionine synthetase, conserved site, S-adenosylmethionine synthetase superfamily, S-adenosylmethionine synthetase, N-terminal	nicotine biosynthesis	Yes
MSTRG.120734	Nitab4.5_0001029g0080	0.8702	CO dehydrogenase flavoprotein-like, FAD-binding, subdomain 2, FAD linked oxidase, N-terminal, FAD-binding, type 2, subdomain 1, FAD-binding, type 2	nicotine biosynthesis	Yes
MSTRG.120734	Nitab4.5_0001965g0070	0.851	S-adenosylmethionine decarboxylase, S-adenosylmethionine decarboxylase, conserved site, S-adenosylmethionine decarboxylase subgroup, S-adenosyl-l-methionine decarboxylase leader peptide, S-adenosylmethionine decarboxylase, core	nicotine biosynthesis	Yes
MSTRG.120734	Nitab4.5_0006307g0010	0.8596	CO dehydrogenase flavoprotein-like, FAD-binding, subdomain 2, FAD-binding, type 2, FAD-binding, type 2, subdomain 1, FAD linked oxidase, N-terminal, Berberine/berberine-like	nicotine biosynthesis	Yes
MSTRG.121353	Nitab4.5_0000063g0120	0.912	S-adenosylmethionine synthetase, conserved site, S-adenosylmethionine synthetase superfamily, S-adenosylmethionine synthetase, N-terminal, S-adenosylmethionine synthetase, S-adenosylmethionine synthetase, C-terminal, S-adenosylmethionine synthetase, central domain	nicotine biosynthesis
MSTRG.121353	Nitab4.5_0000063g0170	0.9464	similar to S-adenosylmethionine synthase 2	nicotine biosynthesis
MSTRG.121353	Nitab4.5_0001029g0080	0.8756	CO dehydrogenase flavoprotein-like, FAD-binding, subdomain 2, FAD linked oxidase, N-terminal, FAD-binding, type 2, subdomain 1, FAD-binding, type 2	nicotine biosynthesis
MSTRG.121510	Nitab4.5_0000013g0390	0.9349	Spermidine/spermine synthases family	nicotine biosynthesis
MSTRG.121510	Nitab4.5_0003284g0010	0.8941	Spermidine/spermine synthases family, Putrescine N-methyltransferase	nicotine biosynthesis
MSTRG.121510	Nitab4.5_0003284g0040	0.8567	Spermidine/spermine synthases family, Putrescine N-methyltransferase	nicotine biosynthesis
MSTRG.121548	Nitab4.5_0000063g0120	0.9369	S-adenosylmethionine synthetase, conserved site, S-adenosylmethionine synthetase superfamily, S-adenosylmethionine synthetase, N-terminal, S-adenosylmethionine synthetase, S-adenosylmethionine synthetase, C-terminal, S-adenosylmethionine synthetase, central domain	nicotine biosynthesis	Yes
MSTRG.121548	Nitab4.5_0000745g0170	0.9382	S-adenosylmethionine synthetase, central domain, S-adenosylmethionine synthetase, S-adenosylmethionine synthetase, C-terminal, S-adenosylmethionine synthetase, conserved site, S-adenosylmethionine synthetase superfamily, S-adenosylmethionine synthetase, N-terminal	nicotine biosynthesis	Yes
MSTRG.121548	Nitab4.5_0001029g0080	0.9413	CO dehydrogenase flavoprotein-like, FAD-binding, subdomain 2, FAD linked oxidase, N-terminal, FAD-binding, type 2, subdomain 1, FAD-binding, type 2	nicotine biosynthesis	Yes
MSTRG.121548	Nitab4.5_0004665g0010	0.8898	S-adenosylmethionine synthetase, conserved site, S-adenosylmethionine synthetase, S-adenosylmethionine synthetase superfamily, S-adenosylmethionine synthetase, C-terminal, S-adenosylmethionine synthetase, central domain, S-adenosylmethionine synthetase, N-terminal	nicotine biosynthesis
MSTRG.121548	Nitab4.5_0008312g0060	0.8873	S-adenosylmethionine synthetase, conserved site, S-adenosylmethionine synthetase, S-adenosylmethionine synthetase, C-terminal, S-adenosylmethionine synthetase superfamily, S-adenosylmethionine synthetase, central domain, S-adenosylmethionine synthetase, N-terminal	nicotine biosynthesis
MSTRG.1219	Nitab4.5_0004816g0010	0.9585	Nicotinate-nucleotide pyrophosphorylase, Quinolinate phosphoribosyl transferase, C-terminal, Quinolinate phosphoribosyl transferase, N-terminal, Aldolase-type TIM barrel, Nicotinate-nucleotide pyrophosphorylase/Putative pyrophosphorylase ModD	nicotine biosynthesis
MSTRG.122393	Nitab4.5_0001270g0090	0.89	Alanine racemase/group IV decarboxylase, C-terminal, Ornithine decarboxylase, Orn/DAP/Arg decarboxylase 2, pyridoxal-phosphate binding site, Orn/DAP/Arg decarboxylase 2, N-terminal, Orn/DAP/Arg decarboxylase 2, C-terminal, Ornithine/DAP/Arg decarboxylase	nicotine biosynthesis
MSTRG.122464	Nitab4.5_0000031g0370	0.8522	NAD(P)-binding domain, NmrA-like	nicotine biosynthesis
MSTRG.122464	Nitab4.5_0000316g0090	0.8556	CO dehydrogenase flavoprotein-like, FAD-binding, subdomain 2, FAD-binding, type 2, Berberine/berberine-like, FAD-binding, type 2, subdomain 1, FAD linked oxidase, N-terminal	nicotine biosynthesis
MSTRG.122464	Nitab4.5_0000884g0010	0.8613	NmrA-like, NAD(P)-binding domain	nicotine biosynthesis
MSTRG.122464	Nitab4.5_0001029g0080	0.8583	CO dehydrogenase flavoprotein-like, FAD-binding, subdomain 2, FAD linked oxidase, N-terminal, FAD-binding, type 2, subdomain 1, FAD-binding, type 2	nicotine biosynthesis
MSTRG.122464	Nitab4.5_0002338g0020	0.8551	FAD binding domain, L-aspartate oxidase, Fumarate reductase/succinate dehydrogenase flavoprotein-like, C-terminal, Succinate dehydrogenase/fumarate reductase flavoprotein, catalytic domain, FAD-dependent pyridine nucleotide-disulphide oxidoreductase	nicotine biosynthesis
MSTRG.122464	Nitab4.5_0006307g0010	0.8669	CO dehydrogenase flavoprotein-like, FAD-binding, subdomain 2, FAD-binding, type 2, FAD-binding, type 2, subdomain 1, FAD linked oxidase, N-terminal, Berberine/berberine-like	nicotine biosynthesis
MSTRG.122464	Nitab4.5_0011232g0010	0.853	Spermidine/spermine synthases family, Putrescine N-methyltransferase	nicotine biosynthesis
MSTRG.122464	Nitab4.5_0015055g0010	0.8579	DNA-binding domain, AP2/ERF domain	nicotine biosynthesis
MSTRG.122661	Nitab4.5_0000063g0120	0.9365	S-adenosylmethionine synthetase, conserved site, S-adenosylmethionine synthetase superfamily, S-adenosylmethionine synthetase, N-terminal, S-adenosylmethionine synthetase, S-adenosylmethionine synthetase, C-terminal, S-adenosylmethionine synthetase, central domain	nicotine biosynthesis	Yes
MSTRG.122661	Nitab4.5_0000063g0170	0.8822	similar to S-adenosylmethionine synthase 2	nicotine biosynthesis	Yes
MSTRG.122661	Nitab4.5_0000745g0170	0.9239	S-adenosylmethionine synthetase, central domain, S-adenosylmethionine synthetase, S-adenosylmethionine synthetase, C-terminal, S-adenosylmethionine synthetase, conserved site, S-adenosylmethionine synthetase superfamily, S-adenosylmethionine synthetase, N-terminal	nicotine biosynthesis	Yes
MSTRG.122661	Nitab4.5_0001029g0080	0.9503	CO dehydrogenase flavoprotein-like, FAD-binding, subdomain 2, FAD linked oxidase, N-terminal, FAD-binding, type 2, subdomain 1, FAD-binding, type 2	nicotine biosynthesis	Yes
MSTRG.122661	Nitab4.5_0004665g0010	0.8826	S-adenosylmethionine synthetase, conserved site, S-adenosylmethionine synthetase, S-adenosylmethionine synthetase superfamily, S-adenosylmethionine synthetase, C-terminal, S-adenosylmethionine synthetase, central domain, S-adenosylmethionine synthetase, N-terminal	nicotine biosynthesis
MSTRG.122668	Nitab4.5_0004816g0010	0.9348	Nicotinate-nucleotide pyrophosphorylase, Quinolinate phosphoribosyl transferase, C-terminal, Quinolinate phosphoribosyl transferase, N-terminal, Aldolase-type TIM barrel, Nicotinate-nucleotide pyrophosphorylase/Putative pyrophosphorylase ModD	nicotine biosynthesis
MSTRG.122981	Nitab4.5_0000031g0370	0.8552	NAD(P)-binding domain, NmrA-like	nicotine biosynthesis	Yes
MSTRG.122981	Nitab4.5_0000316g0090	0.8734	CO dehydrogenase flavoprotein-like, FAD-binding, subdomain 2, FAD-binding, type 2, Berberine/berberine-like, FAD-binding, type 2, subdomain 1, FAD linked oxidase, N-terminal	nicotine biosynthesis	Yes
MSTRG.122981	Nitab4.5_0000884g0010	0.8705	NmrA-like, NAD(P)-binding domain	nicotine biosynthesis	Yes
MSTRG.122981	Nitab4.5_0001029g0080	0.8736	CO dehydrogenase flavoprotein-like, FAD-binding, subdomain 2, FAD linked oxidase, N-terminal, FAD-binding, type 2, subdomain 1, FAD-binding, type 2	nicotine biosynthesis	Yes
MSTRG.122981	Nitab4.5_0002338g0020	0.8586	FAD binding domain, L-aspartate oxidase, Fumarate reductase/succinate dehydrogenase flavoprotein-like, C-terminal, Succinate dehydrogenase/fumarate reductase flavoprotein, catalytic domain, FAD-dependent pyridine nucleotide-disulphide oxidoreductase	nicotine biosynthesis	Yes
MSTRG.122981	Nitab4.5_0003090g0030	0.8546	AP2/ERF domain, DNA-binding domain	nicotine biosynthesis	Yes
MSTRG.122981	Nitab4.5_0006307g0010	0.8948	CO dehydrogenase flavoprotein-like, FAD-binding, subdomain 2, FAD-binding, type 2, FAD-binding, type 2, subdomain 1, FAD linked oxidase, N-terminal, Berberine/berberine-like	nicotine biosynthesis	Yes
MSTRG.122981	Nitab4.5_0011232g0010	0.8588	Spermidine/spermine synthases family, Putrescine N-methyltransferase	nicotine biosynthesis	Yes
MSTRG.122981	Nitab4.5_0015055g0010	0.855	DNA-binding domain, AP2/ERF domain	nicotine biosynthesis	Yes
MSTRG.123125	Nitab4.5_0000013g0380	0.8524	Spermidine/spermine synthases family	nicotine biosynthesis	Yes
MSTRG.123125	Nitab4.5_0000031g0370	0.8654	NAD(P)-binding domain, NmrA-like	nicotine biosynthesis	Yes
MSTRG.123125	Nitab4.5_0000316g0090	0.8568	CO dehydrogenase flavoprotein-like, FAD-binding, subdomain 2, FAD-binding, type 2, Berberine/berberine-like, FAD-binding, type 2, subdomain 1, FAD linked oxidase, N-terminal	nicotine biosynthesis	Yes
MSTRG.123125	Nitab4.5_0000884g0010	0.8824	NmrA-like, NAD(P)-binding domain	nicotine biosynthesis	Yes
MSTRG.123125	Nitab4.5_0001029g0080	0.9129	CO dehydrogenase flavoprotein-like, FAD-binding, subdomain 2, FAD linked oxidase, N-terminal, FAD-binding, type 2, subdomain 1, FAD-binding, type 2	nicotine biosynthesis	Yes
MSTRG.123125	Nitab4.5_0002338g0020	0.8745	FAD binding domain, L-aspartate oxidase, Fumarate reductase/succinate dehydrogenase flavoprotein-like, C-terminal, Succinate dehydrogenase/fumarate reductase flavoprotein, catalytic domain, FAD-dependent pyridine nucleotide-disulphide oxidoreductase	nicotine biosynthesis	Yes
MSTRG.123125	Nitab4.5_0003090g0030	0.8768	AP2/ERF domain, DNA-binding domain	nicotine biosynthesis	Yes
MSTRG.123125	Nitab4.5_0006307g0010	0.8752	CO dehydrogenase flavoprotein-like, FAD-binding, subdomain 2, FAD-binding, type 2, FAD-binding, type 2, subdomain 1, FAD linked oxidase, N-terminal, Berberine/berberine-like	nicotine biosynthesis	Yes
MSTRG.123125	Nitab4.5_0011232g0010	0.8731	Spermidine/spermine synthases family, Putrescine N-methyltransferase	nicotine biosynthesis	Yes
MSTRG.123125	Nitab4.5_0015055g0010	0.8587	DNA-binding domain, AP2/ERF domain	nicotine biosynthesis	Yes
MSTRG.123370	Nitab4.5_0004816g0010	0.8717	Nicotinate-nucleotide pyrophosphorylase, Quinolinate phosphoribosyl transferase, C-terminal, Quinolinate phosphoribosyl transferase, N-terminal, Aldolase-type TIM barrel, Nicotinate-nucleotide pyrophosphorylase/Putative pyrophosphorylase ModD	nicotine biosynthesis
MSTRG.123496	Nitab4.5_0000742g0010	0.8503	Quinolinate phosphoribosyl transferase, C-terminal, Quinolinate phosphoribosyl transferase, N-terminal, Nicotinate-nucleotide pyrophosphorylase, Aldolase-type TIM barrel	nicotine biosynthesis
MSTRG.123496	Nitab4.5_0004816g0010	0.8891	Nicotinate-nucleotide pyrophosphorylase, Quinolinate phosphoribosyl transferase, C-terminal, Quinolinate phosphoribosyl transferase, N-terminal, Aldolase-type TIM barrel, Nicotinate-nucleotide pyrophosphorylase/Putative pyrophosphorylase ModD	nicotine biosynthesis
MSTRG.123556	Nitab4.5_0000013g0380	0.9645	Spermidine/spermine synthases family	nicotine biosynthesis
MSTRG.123556	Nitab4.5_0000013g0390	0.8854	Spermidine/spermine synthases family	nicotine biosynthesis
MSTRG.123556	Nitab4.5_0000025g0290	0.9556	Copper amine oxidase, C-terminal, Copper amine oxidase, N2-terminal, Copper amine oxidase, N3-terminal, Copper amine oxidase, N-terminal, Copper amine oxidase, N2/N3-terminal, Copper amine oxidase	nicotine biosynthesis
MSTRG.123556	Nitab4.5_0000031g0370	0.9985	NAD(P)-binding domain, NmrA-like	nicotine biosynthesis
MSTRG.123556	Nitab4.5_0000316g0090	0.9796	CO dehydrogenase flavoprotein-like, FAD-binding, subdomain 2, FAD-binding, type 2, Berberine/berberine-like, FAD-binding, type 2, subdomain 1, FAD linked oxidase, N-terminal	nicotine biosynthesis
MSTRG.123556	Nitab4.5_0000884g0010	0.9969	NmrA-like, NAD(P)-binding domain	nicotine biosynthesis
MSTRG.123556	Nitab4.5_0001029g0080	0.8542	CO dehydrogenase flavoprotein-like, FAD-binding, subdomain 2, FAD linked oxidase, N-terminal, FAD-binding, type 2, subdomain 1, FAD-binding, type 2	nicotine biosynthesis
MSTRG.123556	Nitab4.5_0002338g0020	0.9942	FAD binding domain, L-aspartate oxidase, Fumarate reductase/succinate dehydrogenase flavoprotein-like, C-terminal, Succinate dehydrogenase/fumarate reductase flavoprotein, catalytic domain, FAD-dependent pyridine nucleotide-disulphide oxidoreductase	nicotine biosynthesis
MSTRG.123556	Nitab4.5_0002522g0070	0.93	Fe-S metabolism associated domain, SufE-like, Quinolinate synthetase A	nicotine biosynthesis
MSTRG.123556	Nitab4.5_0003090g0030	0.9778	AP2/ERF domain, DNA-binding domain	nicotine biosynthesis
MSTRG.123556	Nitab4.5_0003284g0010	0.931	Spermidine/spermine synthases family, Putrescine N-methyltransferase	nicotine biosynthesis
MSTRG.123556	Nitab4.5_0003284g0040	0.9493	Spermidine/spermine synthases family, Putrescine N-methyltransferase	nicotine biosynthesis
MSTRG.123556	Nitab4.5_0005830g0010	0.9688	Succinate dehydrogenase/fumarate reductase flavoprotein, catalytic domain, Fumarate reductase/succinate dehydrogenase flavoprotein-like, C-terminal, FAD binding domain, L-aspartate oxidase, FAD-dependent pyridine nucleotide-disulphide oxidoreductase	nicotine biosynthesis
MSTRG.123556	Nitab4.5_0006307g0010	0.9909	CO dehydrogenase flavoprotein-like, FAD-binding, subdomain 2, FAD-binding, type 2, FAD-binding, type 2, subdomain 1, FAD linked oxidase, N-terminal, Berberine/berberine-like	nicotine biosynthesis
MSTRG.123556	Nitab4.5_0011232g0010	0.9939	Spermidine/spermine synthases family, Putrescine N-methyltransferase	nicotine biosynthesis
MSTRG.123556	Nitab4.5_0015055g0010	0.9987	DNA-binding domain, AP2/ERF domain	nicotine biosynthesis
MSTRG.12358	Nitab4.5_0000155g0200	0.8561	S-adenosylmethionine synthetase superfamily, S-adenosylmethionine synthetase, conserved site, S-adenosylmethionine synthetase, S-adenosylmethionine synthetase, N-terminal, S-adenosylmethionine synthetase, central domain, S-adenosylmethionine synthetase, C-terminal	nicotine biosynthesis
MSTRG.124008	Nitab4.5_0000013g0380	0.8709	Spermidine/spermine synthases family	nicotine biosynthesis
MSTRG.124008	Nitab4.5_0000025g0290	0.8635	Copper amine oxidase, C-terminal, Copper amine oxidase, N2-terminal, Copper amine oxidase, N3-terminal, Copper amine oxidase, N-terminal, Copper amine oxidase, N2/N3-terminal, Copper amine oxidase	nicotine biosynthesis
MSTRG.124008	Nitab4.5_0000031g0370	0.9386	NAD(P)-binding domain, NmrA-like	nicotine biosynthesis
MSTRG.124008	Nitab4.5_0000316g0090	0.9693	CO dehydrogenase flavoprotein-like, FAD-binding, subdomain 2, FAD-binding, type 2, Berberine/berberine-like, FAD-binding, type 2, subdomain 1, FAD linked oxidase, N-terminal	nicotine biosynthesis
MSTRG.124008	Nitab4.5_0000884g0010	0.9397	NmrA-like, NAD(P)-binding domain	nicotine biosynthesis
MSTRG.124008	Nitab4.5_0001029g0080	0.8773	CO dehydrogenase flavoprotein-like, FAD-binding, subdomain 2, FAD linked oxidase, N-terminal, FAD-binding, type 2, subdomain 1, FAD-binding, type 2	nicotine biosynthesis
MSTRG.124008	Nitab4.5_0002338g0020	0.9279	FAD binding domain, L-aspartate oxidase, Fumarate reductase/succinate dehydrogenase flavoprotein-like, C-terminal, Succinate dehydrogenase/fumarate reductase flavoprotein, catalytic domain, FAD-dependent pyridine nucleotide-disulphide oxidoreductase	nicotine biosynthesis
MSTRG.124008	Nitab4.5_0002522g0070	0.8727	Fe-S metabolism associated domain, SufE-like, Quinolinate synthetase A	nicotine biosynthesis
MSTRG.124008	Nitab4.5_0003090g0030	0.8969	AP2/ERF domain, DNA-binding domain	nicotine biosynthesis
MSTRG.124008	Nitab4.5_0005830g0010	0.9094	Succinate dehydrogenase/fumarate reductase flavoprotein, catalytic domain, Fumarate reductase/succinate dehydrogenase flavoprotein-like, C-terminal, FAD binding domain, L-aspartate oxidase, FAD-dependent pyridine nucleotide-disulphide oxidoreductase	nicotine biosynthesis
MSTRG.124008	Nitab4.5_0006307g0010	0.9628	CO dehydrogenase flavoprotein-like, FAD-binding, subdomain 2, FAD-binding, type 2, FAD-binding, type 2, subdomain 1, FAD linked oxidase, N-terminal, Berberine/berberine-like	nicotine biosynthesis
MSTRG.124008	Nitab4.5_0011232g0010	0.9277	Spermidine/spermine synthases family, Putrescine N-methyltransferase	nicotine biosynthesis
MSTRG.124008	Nitab4.5_0015055g0010	0.9518	DNA-binding domain, AP2/ERF domain	nicotine biosynthesis
MSTRG.124500	Nitab4.5_0000034g0230	0.9336	Spermidine/spermine synthases family	nicotine biosynthesis
MSTRG.124500	Nitab4.5_0003646g0010	0.9417	Spermidine/spermine synthases family	nicotine biosynthesis
MSTRG.124502	Nitab4.5_0000034g0230	0.8835	Spermidine/spermine synthases family	nicotine biosynthesis
MSTRG.124502	Nitab4.5_0003646g0010	0.8956	Spermidine/spermine synthases family	nicotine biosynthesis
MSTRG.124577	Nitab4.5_0000013g0390	0.9396	Spermidine/spermine synthases family	nicotine biosynthesis
MSTRG.124577	Nitab4.5_0003284g0010	0.8993	Spermidine/spermine synthases family, Putrescine N-methyltransferase	nicotine biosynthesis
MSTRG.124577	Nitab4.5_0003284g0040	0.8622	Spermidine/spermine synthases family, Putrescine N-methyltransferase	nicotine biosynthesis
MSTRG.124973	Nitab4.5_0000316g0090	0.8728	CO dehydrogenase flavoprotein-like, FAD-binding, subdomain 2, FAD-binding, type 2, Berberine/berberine-like, FAD-binding, type 2, subdomain 1, FAD linked oxidase, N-terminal	nicotine biosynthesis	Yes
MSTRG.124973	Nitab4.5_0000745g0170	0.8682	S-adenosylmethionine synthetase, central domain, S-adenosylmethionine synthetase, S-adenosylmethionine synthetase, C-terminal, S-adenosylmethionine synthetase, conserved site, S-adenosylmethionine synthetase superfamily, S-adenosylmethionine synthetase, N-terminal	nicotine biosynthesis	Yes
MSTRG.124973	Nitab4.5_0001029g0080	0.8791	CO dehydrogenase flavoprotein-like, FAD-binding, subdomain 2, FAD linked oxidase, N-terminal, FAD-binding, type 2, subdomain 1, FAD-binding, type 2	nicotine biosynthesis	Yes
MSTRG.124973	Nitab4.5_0004665g0010	0.8933	S-adenosylmethionine synthetase, conserved site, S-adenosylmethionine synthetase, S-adenosylmethionine synthetase superfamily, S-adenosylmethionine synthetase, C-terminal, S-adenosylmethionine synthetase, central domain, S-adenosylmethionine synthetase, N-terminal	nicotine biosynthesis
MSTRG.125044	Nitab4.5_0002115g0020	0.8589	S-adenosylmethionine synthetase, S-adenosylmethionine synthetase, central domain, S-adenosylmethionine synthetase superfamily, S-adenosylmethionine synthetase, C-terminal, S-adenosylmethionine synthetase, conserved site, S-adenosylmethionine synthetase, N-terminal	nicotine biosynthesis
MSTRG.125252	Nitab4.5_0006589g0020	0.8741	S-adenosylmethionine synthetase superfamily, S-adenosylmethionine synthetase, S-adenosylmethionine synthetase, central domain, S-adenosylmethionine synthetase, N-terminal, S-adenosylmethionine synthetase, conserved site, S-adenosylmethionine synthetase, C-terminal	nicotine biosynthesis
MSTRG.125648	Nitab4.5_0000034g0230	0.8577	Spermidine/spermine synthases family	nicotine biosynthesis
MSTRG.125769	Nitab4.5_0000013g0380	0.8646	Spermidine/spermine synthases family	nicotine biosynthesis	Yes
MSTRG.125769	Nitab4.5_0000025g0290	0.8642	Copper amine oxidase, C-terminal, Copper amine oxidase, N2-terminal, Copper amine oxidase, N3-terminal, Copper amine oxidase, N-terminal, Copper amine oxidase, N2/N3-terminal, Copper amine oxidase	nicotine biosynthesis	Yes
MSTRG.125769	Nitab4.5_0000031g0370	0.8695	NAD(P)-binding domain, NmrA-like	nicotine biosynthesis	Yes
MSTRG.125769	Nitab4.5_0000884g0010	0.8787	NmrA-like, NAD(P)-binding domain	nicotine biosynthesis	Yes
MSTRG.125769	Nitab4.5_0002338g0020	0.8742	FAD binding domain, L-aspartate oxidase, Fumarate reductase/succinate dehydrogenase flavoprotein-like, C-terminal, Succinate dehydrogenase/fumarate reductase flavoprotein, catalytic domain, FAD-dependent pyridine nucleotide-disulphide oxidoreductase	nicotine biosynthesis	Yes
MSTRG.125769	Nitab4.5_0003090g0030	0.8781	AP2/ERF domain, DNA-binding domain	nicotine biosynthesis	Yes
MSTRG.125769	Nitab4.5_0006307g0010	0.8789	CO dehydrogenase flavoprotein-like, FAD-binding, subdomain 2, FAD-binding, type 2, FAD-binding, type 2, subdomain 1, FAD linked oxidase, N-terminal, Berberine/berberine-like	nicotine biosynthesis	Yes
MSTRG.125769	Nitab4.5_0011232g0010	0.8746	Spermidine/spermine synthases family, Putrescine N-methyltransferase	nicotine biosynthesis	Yes
MSTRG.125769	Nitab4.5_0015055g0010	0.8639	DNA-binding domain, AP2/ERF domain	nicotine biosynthesis	Yes
MSTRG.126158	Nitab4.5_0000063g0120	0.8704	S-adenosylmethionine synthetase, conserved site, S-adenosylmethionine synthetase superfamily, S-adenosylmethionine synthetase, N-terminal, S-adenosylmethionine synthetase, S-adenosylmethionine synthetase, C-terminal, S-adenosylmethionine synthetase, central domain	nicotine biosynthesis	Yes
MSTRG.126257	Nitab4.5_0010630g0010	0.8576	Orn/DAP/Arg decarboxylase 2, C-terminal, Orn/DAP/Arg decarboxylase 2, conserved site, Ornithine/DAP/Arg decarboxylase, Orn/DAP/Arg decarboxylase 2, pyridoxal-phosphate binding site, Orn/DAP/Arg decarboxylase 2, N-terminal, Arginine decarboxylase, Alanine racemase/group IV decarboxylase, C-terminal	nicotine biosynthesis
MSTRG.126329	Nitab4.5_0000013g0390	0.8881	Spermidine/spermine synthases family	nicotine biosynthesis
MSTRG.126329	Nitab4.5_0003284g0010	0.8597	Spermidine/spermine synthases family, Putrescine N-methyltransferase	nicotine biosynthesis
MSTRG.126364	Nitab4.5_0001965g0070	0.8753	S-adenosylmethionine decarboxylase, S-adenosylmethionine decarboxylase, conserved site, S-adenosylmethionine decarboxylase subgroup, S-adenosyl-l-methionine decarboxylase leader peptide, S-adenosylmethionine decarboxylase, core	nicotine biosynthesis	Yes
MSTRG.126527	Nitab4.5_0002869g0010	0.8619	S-adenosylmethionine synthetase, N-terminal, S-adenosylmethionine synthetase, conserved site, S-adenosylmethionine synthetase superfamily, S-adenosylmethionine synthetase, central domain, S-adenosylmethionine synthetase, C-terminal, S-adenosylmethionine synthetase	nicotine biosynthesis
MSTRG.126611	Nitab4.5_0000003g0720	0.9357	Copper amine oxidase, N2-terminal, Copper amine oxidase, Copper amine oxidase, C-terminal, Copper amine oxidase, N-terminal, Copper amine oxidase, N2/N3-terminal, Copper amine oxidase, N3-terminal	nicotine biosynthesis
MSTRG.126710	Nitab4.5_0004816g0010	0.856	Nicotinate-nucleotide pyrophosphorylase, Quinolinate phosphoribosyl transferase, C-terminal, Quinolinate phosphoribosyl transferase, N-terminal, Aldolase-type TIM barrel, Nicotinate-nucleotide pyrophosphorylase/Putative pyrophosphorylase ModD	nicotine biosynthesis
MSTRG.126753	Nitab4.5_0000063g0120	0.9016	S-adenosylmethionine synthetase, conserved site, S-adenosylmethionine synthetase superfamily, S-adenosylmethionine synthetase, N-terminal, S-adenosylmethionine synthetase, S-adenosylmethionine synthetase, C-terminal, S-adenosylmethionine synthetase, central domain	nicotine biosynthesis	Yes
MSTRG.126753	Nitab4.5_0000063g0170	0.8912	similar to S-adenosylmethionine synthase 2	nicotine biosynthesis	Yes
MSTRG.126753	Nitab4.5_0000745g0170	0.8996	S-adenosylmethionine synthetase, central domain, S-adenosylmethionine synthetase, S-adenosylmethionine synthetase, C-terminal, S-adenosylmethionine synthetase, conserved site, S-adenosylmethionine synthetase superfamily, S-adenosylmethionine synthetase, N-terminal	nicotine biosynthesis	Yes
MSTRG.126753	Nitab4.5_0001029g0080	0.98	CO dehydrogenase flavoprotein-like, FAD-binding, subdomain 2, FAD linked oxidase, N-terminal, FAD-binding, type 2, subdomain 1, FAD-binding, type 2	nicotine biosynthesis	Yes
MSTRG.127084	Nitab4.5_0000895g0150	0.8585	S-adenosylmethionine synthetase superfamily, S-adenosylmethionine synthetase, conserved site, S-adenosylmethionine synthetase, central domain, S-adenosylmethionine synthetase, S-adenosylmethionine synthetase, C-terminal, S-adenosylmethionine synthetase, N-terminal	nicotine biosynthesis
MSTRG.127084	Nitab4.5_0004665g0010	0.8869	S-adenosylmethionine synthetase, conserved site, S-adenosylmethionine synthetase, S-adenosylmethionine synthetase superfamily, S-adenosylmethionine synthetase, C-terminal, S-adenosylmethionine synthetase, central domain, S-adenosylmethionine synthetase, N-terminal	nicotine biosynthesis
MSTRG.127085	Nitab4.5_0000063g0120	0.8929	S-adenosylmethionine synthetase, conserved site, S-adenosylmethionine synthetase superfamily, S-adenosylmethionine synthetase, N-terminal, S-adenosylmethionine synthetase, S-adenosylmethionine synthetase, C-terminal, S-adenosylmethionine synthetase, central domain	nicotine biosynthesis
MSTRG.127085	Nitab4.5_0000895g0150	0.8563	S-adenosylmethionine synthetase superfamily, S-adenosylmethionine synthetase, conserved site, S-adenosylmethionine synthetase, central domain, S-adenosylmethionine synthetase, S-adenosylmethionine synthetase, C-terminal, S-adenosylmethionine synthetase, N-terminal	nicotine biosynthesis
MSTRG.127085	Nitab4.5_0004665g0010	0.8712	S-adenosylmethionine synthetase, conserved site, S-adenosylmethionine synthetase, S-adenosylmethionine synthetase superfamily, S-adenosylmethionine synthetase, C-terminal, S-adenosylmethionine synthetase, central domain, S-adenosylmethionine synthetase, N-terminal	nicotine biosynthesis
MSTRG.127085	Nitab4.5_0008312g0060	0.8502	S-adenosylmethionine synthetase, conserved site, S-adenosylmethionine synthetase, S-adenosylmethionine synthetase, C-terminal, S-adenosylmethionine synthetase superfamily, S-adenosylmethionine synthetase, central domain, S-adenosylmethionine synthetase, N-terminal	nicotine biosynthesis
MSTRG.127103	Nitab4.5_0000013g0390	0.8846	Spermidine/spermine synthases family	nicotine biosynthesis
MSTRG.128022	Nitab4.5_0000013g0380	0.888	Spermidine/spermine synthases family	nicotine biosynthesis	Yes
MSTRG.128022	Nitab4.5_0000013g0390	0.8848	Spermidine/spermine synthases family	nicotine biosynthesis
MSTRG.128022	Nitab4.5_0000025g0290	0.8751	Copper amine oxidase, C-terminal, Copper amine oxidase, N2-terminal, Copper amine oxidase, N3-terminal, Copper amine oxidase, N-terminal, Copper amine oxidase, N2/N3-terminal, Copper amine oxidase	nicotine biosynthesis	Yes
MSTRG.128022	Nitab4.5_0000031g0370	0.8653	NAD(P)-binding domain, NmrA-like	nicotine biosynthesis	Yes
MSTRG.128022	Nitab4.5_0000884g0010	0.8763	NmrA-like, NAD(P)-binding domain	nicotine biosynthesis	Yes
MSTRG.128022	Nitab4.5_0002338g0020	0.8774	FAD binding domain, L-aspartate oxidase, Fumarate reductase/succinate dehydrogenase flavoprotein-like, C-terminal, Succinate dehydrogenase/fumarate reductase flavoprotein, catalytic domain, FAD-dependent pyridine nucleotide-disulphide oxidoreductase	nicotine biosynthesis	Yes
MSTRG.128022	Nitab4.5_0003090g0030	0.8929	AP2/ERF domain, DNA-binding domain	nicotine biosynthesis	Yes
MSTRG.128022	Nitab4.5_0003284g0010	0.8852	Spermidine/spermine synthases family, Putrescine N-methyltransferase	nicotine biosynthesis	Yes
MSTRG.128022	Nitab4.5_0003284g0040	0.8762	Spermidine/spermine synthases family, Putrescine N-methyltransferase	nicotine biosynthesis	Yes
MSTRG.128022	Nitab4.5_0005830g0010	0.8627	Succinate dehydrogenase/fumarate reductase flavoprotein, catalytic domain, Fumarate reductase/succinate dehydrogenase flavoprotein-like, C-terminal, FAD binding domain, L-aspartate oxidase, FAD-dependent pyridine nucleotide-disulphide oxidoreductase	nicotine biosynthesis	Yes
MSTRG.128022	Nitab4.5_0006307g0010	0.8732	CO dehydrogenase flavoprotein-like, FAD-binding, subdomain 2, FAD-binding, type 2, FAD-binding, type 2, subdomain 1, FAD linked oxidase, N-terminal, Berberine/berberine-like	nicotine biosynthesis	Yes
MSTRG.128022	Nitab4.5_0011232g0010	0.8783	Spermidine/spermine synthases family, Putrescine N-methyltransferase	nicotine biosynthesis	Yes
MSTRG.128022	Nitab4.5_0015055g0010	0.8663	DNA-binding domain, AP2/ERF domain	nicotine biosynthesis	Yes
MSTRG.128046	Nitab4.5_0003029g0020	0.8899	Berberine/berberine-like, CO dehydrogenase flavoprotein-like, FAD-binding, subdomain 2, FAD-binding, type 2, FAD linked oxidase, N-terminal, FAD-binding, type 2, subdomain 1	nicotine biosynthesis
MSTRG.128181	Nitab4.5_0000742g0010	0.8906	Quinolinate phosphoribosyl transferase, C-terminal, Quinolinate phosphoribosyl transferase, N-terminal, Nicotinate-nucleotide pyrophosphorylase, Aldolase-type TIM barrel	nicotine biosynthesis
MSTRG.128373	Nitab4.5_0004816g0010	0.9392	Nicotinate-nucleotide pyrophosphorylase, Quinolinate phosphoribosyl transferase, C-terminal, Quinolinate phosphoribosyl transferase, N-terminal, Aldolase-type TIM barrel, Nicotinate-nucleotide pyrophosphorylase/Putative pyrophosphorylase ModD	nicotine biosynthesis
MSTRG.128575	Nitab4.5_0000316g0090	0.9245	CO dehydrogenase flavoprotein-like, FAD-binding, subdomain 2, FAD-binding, type 2, Berberine/berberine-like, FAD-binding, type 2, subdomain 1, FAD linked oxidase, N-terminal	nicotine biosynthesis
MSTRG.128575	Nitab4.5_0000745g0170	0.926	S-adenosylmethionine synthetase, central domain, S-adenosylmethionine synthetase, S-adenosylmethionine synthetase, C-terminal, S-adenosylmethionine synthetase, conserved site, S-adenosylmethionine synthetase superfamily, S-adenosylmethionine synthetase, N-terminal	nicotine biosynthesis
MSTRG.128575	Nitab4.5_0001029g0080	0.8856	CO dehydrogenase flavoprotein-like, FAD-binding, subdomain 2, FAD linked oxidase, N-terminal, FAD-binding, type 2, subdomain 1, FAD-binding, type 2	nicotine biosynthesis
MSTRG.128575	Nitab4.5_0001965g0070	0.8581	S-adenosylmethionine decarboxylase, S-adenosylmethionine decarboxylase, conserved site, S-adenosylmethionine decarboxylase subgroup, S-adenosyl-l-methionine decarboxylase leader peptide, S-adenosylmethionine decarboxylase, core	nicotine biosynthesis
MSTRG.128742	Nitab4.5_0001029g0080	0.8521	CO dehydrogenase flavoprotein-like, FAD-binding, subdomain 2, FAD linked oxidase, N-terminal, FAD-binding, type 2, subdomain 1, FAD-binding, type 2	nicotine biosynthesis	Yes
MSTRG.129092	Nitab4.5_0000031g0370	0.8694	NAD(P)-binding domain, NmrA-like	nicotine biosynthesis	Yes
MSTRG.129092	Nitab4.5_0000316g0090	0.8676	CO dehydrogenase flavoprotein-like, FAD-binding, subdomain 2, FAD-binding, type 2, Berberine/berberine-like, FAD-binding, type 2, subdomain 1, FAD linked oxidase, N-terminal	nicotine biosynthesis	Yes
MSTRG.129092	Nitab4.5_0000884g0010	0.8719	NmrA-like, NAD(P)-binding domain	nicotine biosynthesis	Yes
MSTRG.129092	Nitab4.5_0002338g0020	0.8682	FAD binding domain, L-aspartate oxidase, Fumarate reductase/succinate dehydrogenase flavoprotein-like, C-terminal, Succinate dehydrogenase/fumarate reductase flavoprotein, catalytic domain, FAD-dependent pyridine nucleotide-disulphide oxidoreductase	nicotine biosynthesis	Yes
MSTRG.129092	Nitab4.5_0006307g0010	0.8523	CO dehydrogenase flavoprotein-like, FAD-binding, subdomain 2, FAD-binding, type 2, FAD-binding, type 2, subdomain 1, FAD linked oxidase, N-terminal, Berberine/berberine-like	nicotine biosynthesis	Yes
MSTRG.129092	Nitab4.5_0011232g0010	0.8613	Spermidine/spermine synthases family, Putrescine N-methyltransferase	nicotine biosynthesis	Yes
MSTRG.129092	Nitab4.5_0015055g0010	0.8635	DNA-binding domain, AP2/ERF domain	nicotine biosynthesis	Yes
MSTRG.129167	Nitab4.5_0000063g0120	0.8597	S-adenosylmethionine synthetase, conserved site, S-adenosylmethionine synthetase superfamily, S-adenosylmethionine synthetase, N-terminal, S-adenosylmethionine synthetase, S-adenosylmethionine synthetase, C-terminal, S-adenosylmethionine synthetase, central domain	nicotine biosynthesis
MSTRG.129817	Nitab4.5_0000063g0120	0.9177	S-adenosylmethionine synthetase, conserved site, S-adenosylmethionine synthetase superfamily, S-adenosylmethionine synthetase, N-terminal, S-adenosylmethionine synthetase, S-adenosylmethionine synthetase, C-terminal, S-adenosylmethionine synthetase, central domain	nicotine biosynthesis
MSTRG.129817	Nitab4.5_0000063g0170	0.8517	similar to S-adenosylmethionine synthase 2	nicotine biosynthesis
MSTRG.129817	Nitab4.5_0000745g0170	0.8609	S-adenosylmethionine synthetase, central domain, S-adenosylmethionine synthetase, S-adenosylmethionine synthetase, C-terminal, S-adenosylmethionine synthetase, conserved site, S-adenosylmethionine synthetase superfamily, S-adenosylmethionine synthetase, N-terminal	nicotine biosynthesis
MSTRG.129817	Nitab4.5_0001029g0080	0.8809	CO dehydrogenase flavoprotein-like, FAD-binding, subdomain 2, FAD linked oxidase, N-terminal, FAD-binding, type 2, subdomain 1, FAD-binding, type 2	nicotine biosynthesis
MSTRG.129858	Nitab4.5_0000316g0090	0.8774	CO dehydrogenase flavoprotein-like, FAD-binding, subdomain 2, FAD-binding, type 2, Berberine/berberine-like, FAD-binding, type 2, subdomain 1, FAD linked oxidase, N-terminal	nicotine biosynthesis	Yes
MSTRG.129858	Nitab4.5_0000745g0170	0.9066	S-adenosylmethionine synthetase, central domain, S-adenosylmethionine synthetase, S-adenosylmethionine synthetase, C-terminal, S-adenosylmethionine synthetase, conserved site, S-adenosylmethionine synthetase superfamily, S-adenosylmethionine synthetase, N-terminal	nicotine biosynthesis	Yes
MSTRG.129858	Nitab4.5_0001029g0080	0.9111	CO dehydrogenase flavoprotein-like, FAD-binding, subdomain 2, FAD linked oxidase, N-terminal, FAD-binding, type 2, subdomain 1, FAD-binding, type 2	nicotine biosynthesis	Yes
MSTRG.129858	Nitab4.5_0001965g0070	0.8623	S-adenosylmethionine decarboxylase, S-adenosylmethionine decarboxylase, conserved site, S-adenosylmethionine decarboxylase subgroup, S-adenosyl-l-methionine decarboxylase leader peptide, S-adenosylmethionine decarboxylase, core	nicotine biosynthesis	Yes
MSTRG.12999	Nitab4.5_0000013g0380	0.886	Spermidine/spermine synthases family	nicotine biosynthesis	Yes
MSTRG.12999	Nitab4.5_0000013g0390	0.892	Spermidine/spermine synthases family	nicotine biosynthesis
MSTRG.12999	Nitab4.5_0000025g0290	0.9076	Copper amine oxidase, C-terminal, Copper amine oxidase, N2-terminal, Copper amine oxidase, N3-terminal, Copper amine oxidase, N-terminal, Copper amine oxidase, N2/N3-terminal, Copper amine oxidase	nicotine biosynthesis	Yes
MSTRG.12999	Nitab4.5_0003090g0030	0.8721	AP2/ERF domain, DNA-binding domain	nicotine biosynthesis	Yes
MSTRG.12999	Nitab4.5_0003284g0010	0.8956	Spermidine/spermine synthases family, Putrescine N-methyltransferase	nicotine biosynthesis	Yes
MSTRG.12999	Nitab4.5_0003284g0040	0.8767	Spermidine/spermine synthases family, Putrescine N-methyltransferase	nicotine biosynthesis	Yes
MSTRG.130187	Nitab4.5_0000013g0380	0.9088	Spermidine/spermine synthases family	nicotine biosynthesis	Yes
MSTRG.130187	Nitab4.5_0000013g0390	0.8748	Spermidine/spermine synthases family	nicotine biosynthesis
MSTRG.130187	Nitab4.5_0000025g0290	0.8911	Copper amine oxidase, C-terminal, Copper amine oxidase, N2-terminal, Copper amine oxidase, N3-terminal, Copper amine oxidase, N-terminal, Copper amine oxidase, N2/N3-terminal, Copper amine oxidase	nicotine biosynthesis	Yes
MSTRG.130187	Nitab4.5_0000031g0370	0.9281	NAD(P)-binding domain, NmrA-like	nicotine biosynthesis	Yes
MSTRG.130187	Nitab4.5_0000316g0090	0.9169	CO dehydrogenase flavoprotein-like, FAD-binding, subdomain 2, FAD-binding, type 2, Berberine/berberine-like, FAD-binding, type 2, subdomain 1, FAD linked oxidase, N-terminal	nicotine biosynthesis	Yes
MSTRG.130187	Nitab4.5_0000745g0170	0.8548	S-adenosylmethionine synthetase, central domain, S-adenosylmethionine synthetase, S-adenosylmethionine synthetase, C-terminal, S-adenosylmethionine synthetase, conserved site, S-adenosylmethionine synthetase superfamily, S-adenosylmethionine synthetase, N-terminal	nicotine biosynthesis	Yes
MSTRG.130187	Nitab4.5_0000884g0010	0.9415	NmrA-like, NAD(P)-binding domain	nicotine biosynthesis	Yes
MSTRG.130187	Nitab4.5_0001029g0080	0.9121	CO dehydrogenase flavoprotein-like, FAD-binding, subdomain 2, FAD linked oxidase, N-terminal, FAD-binding, type 2, subdomain 1, FAD-binding, type 2	nicotine biosynthesis	Yes
MSTRG.130187	Nitab4.5_0002338g0020	0.9329	FAD binding domain, L-aspartate oxidase, Fumarate reductase/succinate dehydrogenase flavoprotein-like, C-terminal, Succinate dehydrogenase/fumarate reductase flavoprotein, catalytic domain, FAD-dependent pyridine nucleotide-disulphide oxidoreductase	nicotine biosynthesis	Yes
MSTRG.130187	Nitab4.5_0002522g0070	0.8596	Fe-S metabolism associated domain, SufE-like, Quinolinate synthetase A	nicotine biosynthesis	Yes
MSTRG.130187	Nitab4.5_0003090g0030	0.9306	AP2/ERF domain, DNA-binding domain	nicotine biosynthesis	Yes
MSTRG.130187	Nitab4.5_0003284g0010	0.8851	Spermidine/spermine synthases family, Putrescine N-methyltransferase	nicotine biosynthesis	Yes
MSTRG.130187	Nitab4.5_0003284g0040	0.8906	Spermidine/spermine synthases family, Putrescine N-methyltransferase	nicotine biosynthesis	Yes
MSTRG.130187	Nitab4.5_0005830g0010	0.8901	Succinate dehydrogenase/fumarate reductase flavoprotein, catalytic domain, Fumarate reductase/succinate dehydrogenase flavoprotein-like, C-terminal, FAD binding domain, L-aspartate oxidase, FAD-dependent pyridine nucleotide-disulphide oxidoreductase	nicotine biosynthesis	Yes
MSTRG.130187	Nitab4.5_0006307g0010	0.9387	CO dehydrogenase flavoprotein-like, FAD-binding, subdomain 2, FAD-binding, type 2, FAD-binding, type 2, subdomain 1, FAD linked oxidase, N-terminal, Berberine/berberine-like	nicotine biosynthesis	Yes
MSTRG.130187	Nitab4.5_0011232g0010	0.9332	Spermidine/spermine synthases family, Putrescine N-methyltransferase	nicotine biosynthesis	Yes
MSTRG.130187	Nitab4.5_0015055g0010	0.9257	DNA-binding domain, AP2/ERF domain	nicotine biosynthesis	Yes
MSTRG.130349	Nitab4.5_0000013g0380	0.8999	Spermidine/spermine synthases family	nicotine biosynthesis
MSTRG.130349	Nitab4.5_0000013g0390	0.9423	Spermidine/spermine synthases family	nicotine biosynthesis
MSTRG.130349	Nitab4.5_0000025g0290	0.8735	Copper amine oxidase, C-terminal, Copper amine oxidase, N2-terminal, Copper amine oxidase, N3-terminal, Copper amine oxidase, N-terminal, Copper amine oxidase, N2/N3-terminal, Copper amine oxidase	nicotine biosynthesis
MSTRG.130349	Nitab4.5_0003090g0030	0.8831	AP2/ERF domain, DNA-binding domain	nicotine biosynthesis
MSTRG.130349	Nitab4.5_0003284g0010	0.9216	Spermidine/spermine synthases family, Putrescine N-methyltransferase	nicotine biosynthesis
MSTRG.130349	Nitab4.5_0003284g0040	0.8932	Spermidine/spermine synthases family, Putrescine N-methyltransferase	nicotine biosynthesis
MSTRG.130550	Nitab4.5_0000316g0090	0.9041	CO dehydrogenase flavoprotein-like, FAD-binding, subdomain 2, FAD-binding, type 2, Berberine/berberine-like, FAD-binding, type 2, subdomain 1, FAD linked oxidase, N-terminal	nicotine biosynthesis
MSTRG.130550	Nitab4.5_0000745g0170	0.9334	S-adenosylmethionine synthetase, central domain, S-adenosylmethionine synthetase, S-adenosylmethionine synthetase, C-terminal, S-adenosylmethionine synthetase, conserved site, S-adenosylmethionine synthetase superfamily, S-adenosylmethionine synthetase, N-terminal	nicotine biosynthesis
MSTRG.130550	Nitab4.5_0001029g0080	0.9002	CO dehydrogenase flavoprotein-like, FAD-binding, subdomain 2, FAD linked oxidase, N-terminal, FAD-binding, type 2, subdomain 1, FAD-binding, type 2	nicotine biosynthesis
MSTRG.130570	Nitab4.5_0001965g0070	0.8793	S-adenosylmethionine decarboxylase, S-adenosylmethionine decarboxylase, conserved site, S-adenosylmethionine decarboxylase subgroup, S-adenosyl-l-methionine decarboxylase leader peptide, S-adenosylmethionine decarboxylase, core	nicotine biosynthesis	Yes
MSTRG.130774	Nitab4.5_0008312g0060	0.8707	S-adenosylmethionine synthetase, conserved site, S-adenosylmethionine synthetase, S-adenosylmethionine synthetase, C-terminal, S-adenosylmethionine synthetase superfamily, S-adenosylmethionine synthetase, central domain, S-adenosylmethionine synthetase, N-terminal	nicotine biosynthesis
MSTRG.130927	Nitab4.5_0004816g0010	0.9636	Nicotinate-nucleotide pyrophosphorylase, Quinolinate phosphoribosyl transferase, C-terminal, Quinolinate phosphoribosyl transferase, N-terminal, Aldolase-type TIM barrel, Nicotinate-nucleotide pyrophosphorylase/Putative pyrophosphorylase ModD	nicotine biosynthesis
MSTRG.131122	Nitab4.5_0000063g0120	0.8699	S-adenosylmethionine synthetase, conserved site, S-adenosylmethionine synthetase superfamily, S-adenosylmethionine synthetase, N-terminal, S-adenosylmethionine synthetase, S-adenosylmethionine synthetase, C-terminal, S-adenosylmethionine synthetase, central domain	nicotine biosynthesis
MSTRG.131122	Nitab4.5_0000063g0170	0.879	similar to S-adenosylmethionine synthase 2	nicotine biosynthesis
MSTRG.131122	Nitab4.5_0000745g0170	0.8528	S-adenosylmethionine synthetase, central domain, S-adenosylmethionine synthetase, S-adenosylmethionine synthetase, C-terminal, S-adenosylmethionine synthetase, conserved site, S-adenosylmethionine synthetase superfamily, S-adenosylmethionine synthetase, N-terminal	nicotine biosynthesis
MSTRG.131122	Nitab4.5_0001029g0080	0.8591	CO dehydrogenase flavoprotein-like, FAD-binding, subdomain 2, FAD linked oxidase, N-terminal, FAD-binding, type 2, subdomain 1, FAD-binding, type 2	nicotine biosynthesis
MSTRG.131312	Nitab4.5_0002115g0020	0.8624	S-adenosylmethionine synthetase, S-adenosylmethionine synthetase, central domain, S-adenosylmethionine synthetase superfamily, S-adenosylmethionine synthetase, C-terminal, S-adenosylmethionine synthetase, conserved site, S-adenosylmethionine synthetase, N-terminal	nicotine biosynthesis
MSTRG.131312	Nitab4.5_0003524g0020	0.853	S-adenosylmethionine synthetase superfamily, S-adenosylmethionine synthetase, S-adenosylmethionine synthetase, N-terminal, S-adenosylmethionine synthetase, conserved site, S-adenosylmethionine synthetase, central domain, S-adenosylmethionine synthetase, C-terminal	nicotine biosynthesis
MSTRG.131805	Nitab4.5_0004816g0010	0.9723	Nicotinate-nucleotide pyrophosphorylase, Quinolinate phosphoribosyl transferase, C-terminal, Quinolinate phosphoribosyl transferase, N-terminal, Aldolase-type TIM barrel, Nicotinate-nucleotide pyrophosphorylase/Putative pyrophosphorylase ModD	nicotine biosynthesis
MSTRG.131806	Nitab4.5_0004816g0010	0.9876	Nicotinate-nucleotide pyrophosphorylase, Quinolinate phosphoribosyl transferase, C-terminal, Quinolinate phosphoribosyl transferase, N-terminal, Aldolase-type TIM barrel, Nicotinate-nucleotide pyrophosphorylase/Putative pyrophosphorylase ModD	nicotine biosynthesis
MSTRG.131822	Nitab4.5_0000063g0120	0.8507	S-adenosylmethionine synthetase, conserved site, S-adenosylmethionine synthetase superfamily, S-adenosylmethionine synthetase, N-terminal, S-adenosylmethionine synthetase, S-adenosylmethionine synthetase, C-terminal, S-adenosylmethionine synthetase, central domain	nicotine biosynthesis	Yes
MSTRG.131822	Nitab4.5_0000316g0090	0.8713	CO dehydrogenase flavoprotein-like, FAD-binding, subdomain 2, FAD-binding, type 2, Berberine/berberine-like, FAD-binding, type 2, subdomain 1, FAD linked oxidase, N-terminal	nicotine biosynthesis	Yes
MSTRG.131822	Nitab4.5_0000745g0170	0.857	S-adenosylmethionine synthetase, central domain, S-adenosylmethionine synthetase, S-adenosylmethionine synthetase, C-terminal, S-adenosylmethionine synthetase, conserved site, S-adenosylmethionine synthetase superfamily, S-adenosylmethionine synthetase, N-terminal	nicotine biosynthesis	Yes
MSTRG.131822	Nitab4.5_0000884g0010	0.8517	NmrA-like, NAD(P)-binding domain	nicotine biosynthesis	Yes
MSTRG.131822	Nitab4.5_0001029g0080	0.945	CO dehydrogenase flavoprotein-like, FAD-binding, subdomain 2, FAD linked oxidase, N-terminal, FAD-binding, type 2, subdomain 1, FAD-binding, type 2	nicotine biosynthesis	Yes
MSTRG.131822	Nitab4.5_0006307g0010	0.8651	CO dehydrogenase flavoprotein-like, FAD-binding, subdomain 2, FAD-binding, type 2, FAD-binding, type 2, subdomain 1, FAD linked oxidase, N-terminal, Berberine/berberine-like	nicotine biosynthesis	Yes
MSTRG.131996	Nitab4.5_0000814g0090	0.8606	S-adenosylmethionine synthetase superfamily, S-adenosylmethionine synthetase, N-terminal, S-adenosylmethionine synthetase, C-terminal, S-adenosylmethionine synthetase, S-adenosylmethionine synthetase, conserved site, S-adenosylmethionine synthetase, central domain	nicotine biosynthesis
MSTRG.131996	Nitab4.5_0000895g0150	0.8785	S-adenosylmethionine synthetase superfamily, S-adenosylmethionine synthetase, conserved site, S-adenosylmethionine synthetase, central domain, S-adenosylmethionine synthetase, S-adenosylmethionine synthetase, C-terminal, S-adenosylmethionine synthetase, N-terminal	nicotine biosynthesis
MSTRG.131996	Nitab4.5_0004665g0010	0.8785	S-adenosylmethionine synthetase, conserved site, S-adenosylmethionine synthetase, S-adenosylmethionine synthetase superfamily, S-adenosylmethionine synthetase, C-terminal, S-adenosylmethionine synthetase, central domain, S-adenosylmethionine synthetase, N-terminal	nicotine biosynthesis
MSTRG.131996	Nitab4.5_0008312g0060	0.8611	S-adenosylmethionine synthetase, conserved site, S-adenosylmethionine synthetase, S-adenosylmethionine synthetase, C-terminal, S-adenosylmethionine synthetase superfamily, S-adenosylmethionine synthetase, central domain, S-adenosylmethionine synthetase, N-terminal	nicotine biosynthesis
MSTRG.132275	Nitab4.5_0000003g0720	0.8888	Copper amine oxidase, N2-terminal, Copper amine oxidase, Copper amine oxidase, C-terminal, Copper amine oxidase, N-terminal, Copper amine oxidase, N2/N3-terminal, Copper amine oxidase, N3-terminal	nicotine biosynthesis
MSTRG.13234	Nitab4.5_0000884g0010	0.8542	NmrA-like, NAD(P)-binding domain	nicotine biosynthesis	Yes
MSTRG.13234	Nitab4.5_0001029g0080	0.9205	CO dehydrogenase flavoprotein-like, FAD-binding, subdomain 2, FAD linked oxidase, N-terminal, FAD-binding, type 2, subdomain 1, FAD-binding, type 2	nicotine biosynthesis	Yes
MSTRG.132744	Nitab4.5_0000578g0090	0.8793	S-adenosylmethionine synthetase, central domain, S-adenosylmethionine synthetase, conserved site, S-adenosylmethionine synthetase, S-adenosylmethionine synthetase superfamily, S-adenosylmethionine synthetase, C-terminal, S-adenosylmethionine synthetase, N-terminal	nicotine biosynthesis
MSTRG.132788	Nitab4.5_0000031g0370	0.8502	NAD(P)-binding domain, NmrA-like	nicotine biosynthesis	Yes
MSTRG.132788	Nitab4.5_0000316g0090	0.8955	CO dehydrogenase flavoprotein-like, FAD-binding, subdomain 2, FAD-binding, type 2, Berberine/berberine-like, FAD-binding, type 2, subdomain 1, FAD linked oxidase, N-terminal	nicotine biosynthesis	Yes
MSTRG.132788	Nitab4.5_0000884g0010	0.8553	NmrA-like, NAD(P)-binding domain	nicotine biosynthesis	Yes
MSTRG.132788	Nitab4.5_0005830g0010	0.8553	Succinate dehydrogenase/fumarate reductase flavoprotein, catalytic domain, Fumarate reductase/succinate dehydrogenase flavoprotein-like, C-terminal, FAD binding domain, L-aspartate oxidase, FAD-dependent pyridine nucleotide-disulphide oxidoreductase	nicotine biosynthesis	Yes
MSTRG.132788	Nitab4.5_0006307g0010	0.8727	CO dehydrogenase flavoprotein-like, FAD-binding, subdomain 2, FAD-binding, type 2, FAD-binding, type 2, subdomain 1, FAD linked oxidase, N-terminal, Berberine/berberine-like	nicotine biosynthesis	Yes
MSTRG.132788	Nitab4.5_0015055g0010	0.8581	DNA-binding domain, AP2/ERF domain	nicotine biosynthesis	Yes
MSTRG.133034	Nitab4.5_0004816g0010	0.9255	Nicotinate-nucleotide pyrophosphorylase, Quinolinate phosphoribosyl transferase, C-terminal, Quinolinate phosphoribosyl transferase, N-terminal, Aldolase-type TIM barrel, Nicotinate-nucleotide pyrophosphorylase/Putative pyrophosphorylase ModD	nicotine biosynthesis
MSTRG.133277	Nitab4.5_0000063g0120	0.8614	S-adenosylmethionine synthetase, conserved site, S-adenosylmethionine synthetase superfamily, S-adenosylmethionine synthetase, N-terminal, S-adenosylmethionine synthetase, S-adenosylmethionine synthetase, C-terminal, S-adenosylmethionine synthetase, central domain	nicotine biosynthesis	Yes
MSTRG.133277	Nitab4.5_0001029g0080	0.8529	CO dehydrogenase flavoprotein-like, FAD-binding, subdomain 2, FAD linked oxidase, N-terminal, FAD-binding, type 2, subdomain 1, FAD-binding, type 2	nicotine biosynthesis	Yes
MSTRG.133298	Nitab4.5_0000063g0120	0.8516	S-adenosylmethionine synthetase, conserved site, S-adenosylmethionine synthetase superfamily, S-adenosylmethionine synthetase, N-terminal, S-adenosylmethionine synthetase, S-adenosylmethionine synthetase, C-terminal, S-adenosylmethionine synthetase, central domain	nicotine biosynthesis	Yes
MSTRG.133298	Nitab4.5_0001029g0080	0.8826	CO dehydrogenase flavoprotein-like, FAD-binding, subdomain 2, FAD linked oxidase, N-terminal, FAD-binding, type 2, subdomain 1, FAD-binding, type 2	nicotine biosynthesis	Yes
MSTRG.133298	Nitab4.5_0004665g0010	0.8654	S-adenosylmethionine synthetase, conserved site, S-adenosylmethionine synthetase, S-adenosylmethionine synthetase superfamily, S-adenosylmethionine synthetase, C-terminal, S-adenosylmethionine synthetase, central domain, S-adenosylmethionine synthetase, N-terminal	nicotine biosynthesis
MSTRG.13339	Nitab4.5_0008312g0060	0.8547	S-adenosylmethionine synthetase, conserved site, S-adenosylmethionine synthetase, S-adenosylmethionine synthetase, C-terminal, S-adenosylmethionine synthetase superfamily, S-adenosylmethionine synthetase, central domain, S-adenosylmethionine synthetase, N-terminal	nicotine biosynthesis
MSTRG.133636	Nitab4.5_0000259g0260	0.8782	S-adenosylmethionine decarboxylase, core, S-adenosyl-l-methionine decarboxylase leader peptide, S-adenosylmethionine decarboxylase, S-adenosylmethionine decarboxylase subgroup, S-adenosylmethionine decarboxylase, conserved site	nicotine biosynthesis
MSTRG.133680	Nitab4.5_0000063g0120	0.8522	S-adenosylmethionine synthetase, conserved site, S-adenosylmethionine synthetase superfamily, S-adenosylmethionine synthetase, N-terminal, S-adenosylmethionine synthetase, S-adenosylmethionine synthetase, C-terminal, S-adenosylmethionine synthetase, central domain	nicotine biosynthesis	Yes
MSTRG.133680	Nitab4.5_0001029g0080	0.8748	CO dehydrogenase flavoprotein-like, FAD-binding, subdomain 2, FAD linked oxidase, N-terminal, FAD-binding, type 2, subdomain 1, FAD-binding, type 2	nicotine biosynthesis	Yes
MSTRG.133735	Nitab4.5_0004816g0010	0.9844	Nicotinate-nucleotide pyrophosphorylase, Quinolinate phosphoribosyl transferase, C-terminal, Quinolinate phosphoribosyl transferase, N-terminal, Aldolase-type TIM barrel, Nicotinate-nucleotide pyrophosphorylase/Putative pyrophosphorylase ModD	nicotine biosynthesis
MSTRG.133755	Nitab4.5_0000013g0390	0.8652	Spermidine/spermine synthases family	nicotine biosynthesis
MSTRG.133755	Nitab4.5_0003284g0010	0.8506	Spermidine/spermine synthases family, Putrescine N-methyltransferase	nicotine biosynthesis	Yes
MSTRG.133881	Nitab4.5_0000742g0010	0.8655	Quinolinate phosphoribosyl transferase, C-terminal, Quinolinate phosphoribosyl transferase, N-terminal, Nicotinate-nucleotide pyrophosphorylase, Aldolase-type TIM barrel	nicotine biosynthesis
MSTRG.133881	Nitab4.5_0004816g0010	0.9197	Nicotinate-nucleotide pyrophosphorylase, Quinolinate phosphoribosyl transferase, C-terminal, Quinolinate phosphoribosyl transferase, N-terminal, Aldolase-type TIM barrel, Nicotinate-nucleotide pyrophosphorylase/Putative pyrophosphorylase ModD	nicotine biosynthesis
MSTRG.134307	Nitab4.5_0000013g0390	0.8681	Spermidine/spermine synthases family	nicotine biosynthesis
MSTRG.134337	Nitab4.5_0000003g0720	0.8951	Copper amine oxidase, N2-terminal, Copper amine oxidase, Copper amine oxidase, C-terminal, Copper amine oxidase, N-terminal, Copper amine oxidase, N2/N3-terminal, Copper amine oxidase, N3-terminal	nicotine biosynthesis
MSTRG.134765	Nitab4.5_0000003g0720	0.8608	Copper amine oxidase, N2-terminal, Copper amine oxidase, Copper amine oxidase, C-terminal, Copper amine oxidase, N-terminal, Copper amine oxidase, N2/N3-terminal, Copper amine oxidase, N3-terminal	nicotine biosynthesis
MSTRG.134803	Nitab4.5_0000745g0170	0.8632	S-adenosylmethionine synthetase, central domain, S-adenosylmethionine synthetase, S-adenosylmethionine synthetase, C-terminal, S-adenosylmethionine synthetase, conserved site, S-adenosylmethionine synthetase superfamily, S-adenosylmethionine synthetase, N-terminal	nicotine biosynthesis
MSTRG.135019	Nitab4.5_0004816g0010	0.9685	Nicotinate-nucleotide pyrophosphorylase, Quinolinate phosphoribosyl transferase, C-terminal, Quinolinate phosphoribosyl transferase, N-terminal, Aldolase-type TIM barrel, Nicotinate-nucleotide pyrophosphorylase/Putative pyrophosphorylase ModD	nicotine biosynthesis
MSTRG.135160	Nitab4.5_0000155g0200	0.9267	S-adenosylmethionine synthetase superfamily, S-adenosylmethionine synthetase, conserved site, S-adenosylmethionine synthetase, S-adenosylmethionine synthetase, N-terminal, S-adenosylmethionine synthetase, central domain, S-adenosylmethionine synthetase, C-terminal	nicotine biosynthesis
MSTRG.135291	Nitab4.5_0000063g0120	0.852	S-adenosylmethionine synthetase, conserved site, S-adenosylmethionine synthetase superfamily, S-adenosylmethionine synthetase, N-terminal, S-adenosylmethionine synthetase, S-adenosylmethionine synthetase, C-terminal, S-adenosylmethionine synthetase, central domain	nicotine biosynthesis
MSTRG.135560	Nitab4.5_0000316g0090	0.9177	CO dehydrogenase flavoprotein-like, FAD-binding, subdomain 2, FAD-binding, type 2, Berberine/berberine-like, FAD-binding, type 2, subdomain 1, FAD linked oxidase, N-terminal	nicotine biosynthesis
MSTRG.135560	Nitab4.5_0000745g0170	0.908	S-adenosylmethionine synthetase, central domain, S-adenosylmethionine synthetase, S-adenosylmethionine synthetase, C-terminal, S-adenosylmethionine synthetase, conserved site, S-adenosylmethionine synthetase superfamily, S-adenosylmethionine synthetase, N-terminal	nicotine biosynthesis
MSTRG.135560	Nitab4.5_0001029g0080	0.8647	CO dehydrogenase flavoprotein-like, FAD-binding, subdomain 2, FAD linked oxidase, N-terminal, FAD-binding, type 2, subdomain 1, FAD-binding, type 2	nicotine biosynthesis
MSTRG.135955	Nitab4.5_0000745g0170	0.8908	S-adenosylmethionine synthetase, central domain, S-adenosylmethionine synthetase, S-adenosylmethionine synthetase, C-terminal, S-adenosylmethionine synthetase, conserved site, S-adenosylmethionine synthetase superfamily, S-adenosylmethionine synthetase, N-terminal	nicotine biosynthesis
MSTRG.136121	Nitab4.5_0001270g0090	0.8658	Alanine racemase/group IV decarboxylase, C-terminal, Ornithine decarboxylase, Orn/DAP/Arg decarboxylase 2, pyridoxal-phosphate binding site, Orn/DAP/Arg decarboxylase 2, N-terminal, Orn/DAP/Arg decarboxylase 2, C-terminal, Ornithine/DAP/Arg decarboxylase	nicotine biosynthesis
MSTRG.13613	Nitab4.5_0003280g0010	0.9382	Alanine racemase/group IV decarboxylase, C-terminal, Orn/DAP/Arg decarboxylase 2, N-terminal, Ornithine/DAP/Arg decarboxylase, Orn/DAP/Arg decarboxylase 2, conserved site, Orn/DAP/Arg decarboxylase 2, pyridoxal-phosphate binding site, Orn/DAP/Arg decarboxylase 2, C-terminal, Ornithine decarboxylase	nicotine biosynthesis
MSTRG.13613	Nitab4.5_0010954g0020	0.8647	Spermidine/spermine synthases family	nicotine biosynthesis
MSTRG.1363	Nitab4.5_0000063g0120	0.8555	S-adenosylmethionine synthetase, conserved site, S-adenosylmethionine synthetase superfamily, S-adenosylmethionine synthetase, N-terminal, S-adenosylmethionine synthetase, S-adenosylmethionine synthetase, C-terminal, S-adenosylmethionine synthetase, central domain	nicotine biosynthesis	Yes
MSTRG.136368	Nitab4.5_0003029g0030	0.9154	FAD-binding, type 2, subdomain 1, FAD linked oxidase, N-terminal, FAD-binding, type 2, Berberine/berberine-like	nicotine biosynthesis
MSTRG.1364	Nitab4.5_0000578g0090	0.9189	S-adenosylmethionine synthetase, central domain, S-adenosylmethionine synthetase, conserved site, S-adenosylmethionine synthetase, S-adenosylmethionine synthetase superfamily, S-adenosylmethionine synthetase, C-terminal, S-adenosylmethionine synthetase, N-terminal	nicotine biosynthesis
MSTRG.1364	Nitab4.5_0008624g0040	0.8645	S-adenosylmethionine synthetase, S-adenosylmethionine synthetase, N-terminal, S-adenosylmethionine synthetase superfamily, S-adenosylmethionine synthetase, conserved site, S-adenosylmethionine synthetase, C-terminal, S-adenosylmethionine synthetase, central domain	nicotine biosynthesis
MSTRG.136651	Nitab4.5_0000003g0720	0.8626	Copper amine oxidase, N2-terminal, Copper amine oxidase, Copper amine oxidase, C-terminal, Copper amine oxidase, N-terminal, Copper amine oxidase, N2/N3-terminal, Copper amine oxidase, N3-terminal	nicotine biosynthesis
MSTRG.136883	Nitab4.5_0000063g0120	0.8816	S-adenosylmethionine synthetase, conserved site, S-adenosylmethionine synthetase superfamily, S-adenosylmethionine synthetase, N-terminal, S-adenosylmethionine synthetase, S-adenosylmethionine synthetase, C-terminal, S-adenosylmethionine synthetase, central domain	nicotine biosynthesis	Yes
MSTRG.136883	Nitab4.5_0000316g0090	0.878	CO dehydrogenase flavoprotein-like, FAD-binding, subdomain 2, FAD-binding, type 2, Berberine/berberine-like, FAD-binding, type 2, subdomain 1, FAD linked oxidase, N-terminal	nicotine biosynthesis	Yes
MSTRG.136883	Nitab4.5_0000745g0170	0.8828	S-adenosylmethionine synthetase, central domain, S-adenosylmethionine synthetase, S-adenosylmethionine synthetase, C-terminal, S-adenosylmethionine synthetase, conserved site, S-adenosylmethionine synthetase superfamily, S-adenosylmethionine synthetase, N-terminal	nicotine biosynthesis	Yes
MSTRG.136883	Nitab4.5_0001029g0080	0.9445	CO dehydrogenase flavoprotein-like, FAD-binding, subdomain 2, FAD linked oxidase, N-terminal, FAD-binding, type 2, subdomain 1, FAD-binding, type 2	nicotine biosynthesis	Yes
MSTRG.136883	Nitab4.5_0004665g0010	0.8537	S-adenosylmethionine synthetase, conserved site, S-adenosylmethionine synthetase, S-adenosylmethionine synthetase superfamily, S-adenosylmethionine synthetase, C-terminal, S-adenosylmethionine synthetase, central domain, S-adenosylmethionine synthetase, N-terminal	nicotine biosynthesis
MSTRG.136930	Nitab4.5_0000034g0230	0.862	Spermidine/spermine synthases family	nicotine biosynthesis
MSTRG.136930	Nitab4.5_0001270g0090	0.859	Alanine racemase/group IV decarboxylase, C-terminal, Ornithine decarboxylase, Orn/DAP/Arg decarboxylase 2, pyridoxal-phosphate binding site, Orn/DAP/Arg decarboxylase 2, N-terminal, Orn/DAP/Arg decarboxylase 2, C-terminal, Ornithine/DAP/Arg decarboxylase	nicotine biosynthesis
MSTRG.136930	Nitab4.5_0003280g0010	0.8809	Alanine racemase/group IV decarboxylase, C-terminal, Orn/DAP/Arg decarboxylase 2, N-terminal, Ornithine/DAP/Arg decarboxylase, Orn/DAP/Arg decarboxylase 2, conserved site, Orn/DAP/Arg decarboxylase 2, pyridoxal-phosphate binding site, Orn/DAP/Arg decarboxylase 2, C-terminal, Ornithine decarboxylase	nicotine biosynthesis
MSTRG.136931	Nitab4.5_0003280g0010	0.8751	Alanine racemase/group IV decarboxylase, C-terminal, Orn/DAP/Arg decarboxylase 2, N-terminal, Ornithine/DAP/Arg decarboxylase, Orn/DAP/Arg decarboxylase 2, conserved site, Orn/DAP/Arg decarboxylase 2, pyridoxal-phosphate binding site, Orn/DAP/Arg decarboxylase 2, C-terminal, Ornithine decarboxylase	nicotine biosynthesis
MSTRG.13748	Nitab4.5_0003029g0020	0.9023	Berberine/berberine-like, CO dehydrogenase flavoprotein-like, FAD-binding, subdomain 2, FAD-binding, type 2, FAD linked oxidase, N-terminal, FAD-binding, type 2, subdomain 1	nicotine biosynthesis
MSTRG.138105	Nitab4.5_0000013g0380	0.9036	Spermidine/spermine synthases family	nicotine biosynthesis
MSTRG.138105	Nitab4.5_0000025g0290	0.8976	Copper amine oxidase, C-terminal, Copper amine oxidase, N2-terminal, Copper amine oxidase, N3-terminal, Copper amine oxidase, N-terminal, Copper amine oxidase, N2/N3-terminal, Copper amine oxidase	nicotine biosynthesis
MSTRG.138105	Nitab4.5_0000031g0370	0.9521	NAD(P)-binding domain, NmrA-like	nicotine biosynthesis
MSTRG.138105	Nitab4.5_0000316g0090	0.9444	CO dehydrogenase flavoprotein-like, FAD-binding, subdomain 2, FAD-binding, type 2, Berberine/berberine-like, FAD-binding, type 2, subdomain 1, FAD linked oxidase, N-terminal	nicotine biosynthesis
MSTRG.138105	Nitab4.5_0000884g0010	0.9472	NmrA-like, NAD(P)-binding domain	nicotine biosynthesis
MSTRG.138105	Nitab4.5_0002338g0020	0.9424	FAD binding domain, L-aspartate oxidase, Fumarate reductase/succinate dehydrogenase flavoprotein-like, C-terminal, Succinate dehydrogenase/fumarate reductase flavoprotein, catalytic domain, FAD-dependent pyridine nucleotide-disulphide oxidoreductase	nicotine biosynthesis
MSTRG.138105	Nitab4.5_0002522g0070	0.8725	Fe-S metabolism associated domain, SufE-like, Quinolinate synthetase A	nicotine biosynthesis
MSTRG.138105	Nitab4.5_0003090g0030	0.9169	AP2/ERF domain, DNA-binding domain	nicotine biosynthesis
MSTRG.138105	Nitab4.5_0003284g0010	0.8644	Spermidine/spermine synthases family, Putrescine N-methyltransferase	nicotine biosynthesis
MSTRG.138105	Nitab4.5_0003284g0040	0.8856	Spermidine/spermine synthases family, Putrescine N-methyltransferase	nicotine biosynthesis
MSTRG.138105	Nitab4.5_0005830g0010	0.922	Succinate dehydrogenase/fumarate reductase flavoprotein, catalytic domain, Fumarate reductase/succinate dehydrogenase flavoprotein-like, C-terminal, FAD binding domain, L-aspartate oxidase, FAD-dependent pyridine nucleotide-disulphide oxidoreductase	nicotine biosynthesis
MSTRG.138105	Nitab4.5_0006307g0010	0.9453	CO dehydrogenase flavoprotein-like, FAD-binding, subdomain 2, FAD-binding, type 2, FAD-binding, type 2, subdomain 1, FAD linked oxidase, N-terminal, Berberine/berberine-like	nicotine biosynthesis
MSTRG.138105	Nitab4.5_0011232g0010	0.9424	Spermidine/spermine synthases family, Putrescine N-methyltransferase	nicotine biosynthesis
MSTRG.138105	Nitab4.5_0015055g0010	0.9585	DNA-binding domain, AP2/ERF domain	nicotine biosynthesis
MSTRG.138144	Nitab4.5_0000013g0390	0.896	Spermidine/spermine synthases family	nicotine biosynthesis
MSTRG.138144	Nitab4.5_0003284g0010	0.8677	Spermidine/spermine synthases family, Putrescine N-methyltransferase	nicotine biosynthesis
MSTRG.138321	Nitab4.5_0000316g0090	0.8502	CO dehydrogenase flavoprotein-like, FAD-binding, subdomain 2, FAD-binding, type 2, Berberine/berberine-like, FAD-binding, type 2, subdomain 1, FAD linked oxidase, N-terminal	nicotine biosynthesis
MSTRG.138321	Nitab4.5_0000745g0170	0.8613	S-adenosylmethionine synthetase, central domain, S-adenosylmethionine synthetase, S-adenosylmethionine synthetase, C-terminal, S-adenosylmethionine synthetase, conserved site, S-adenosylmethionine synthetase superfamily, S-adenosylmethionine synthetase, N-terminal	nicotine biosynthesis
MSTRG.138837	Nitab4.5_0000003g0720	0.8879	Copper amine oxidase, N2-terminal, Copper amine oxidase, Copper amine oxidase, C-terminal, Copper amine oxidase, N-terminal, Copper amine oxidase, N2/N3-terminal, Copper amine oxidase, N3-terminal	nicotine biosynthesis
MSTRG.138843	Nitab4.5_0000259g0260	0.8525	S-adenosylmethionine decarboxylase, core, S-adenosyl-l-methionine decarboxylase leader peptide, S-adenosylmethionine decarboxylase, S-adenosylmethionine decarboxylase subgroup, S-adenosylmethionine decarboxylase, conserved site	nicotine biosynthesis
MSTRG.138902	Nitab4.5_0004665g0010	0.8651	S-adenosylmethionine synthetase, conserved site, S-adenosylmethionine synthetase, S-adenosylmethionine synthetase superfamily, S-adenosylmethionine synthetase, C-terminal, S-adenosylmethionine synthetase, central domain, S-adenosylmethionine synthetase, N-terminal	nicotine biosynthesis
MSTRG.139063	Nitab4.5_0001029g0080	0.8531	CO dehydrogenase flavoprotein-like, FAD-binding, subdomain 2, FAD linked oxidase, N-terminal, FAD-binding, type 2, subdomain 1, FAD-binding, type 2	nicotine biosynthesis	Yes
MSTRG.13939	Nitab4.5_0000003g0720	0.8803	Copper amine oxidase, N2-terminal, Copper amine oxidase, Copper amine oxidase, C-terminal, Copper amine oxidase, N-terminal, Copper amine oxidase, N2/N3-terminal, Copper amine oxidase, N3-terminal	nicotine biosynthesis
MSTRG.139652	Nitab4.5_0004816g0010	0.9704	Nicotinate-nucleotide pyrophosphorylase, Quinolinate phosphoribosyl transferase, C-terminal, Quinolinate phosphoribosyl transferase, N-terminal, Aldolase-type TIM barrel, Nicotinate-nucleotide pyrophosphorylase/Putative pyrophosphorylase ModD	nicotine biosynthesis
MSTRG.139664	Nitab4.5_0000013g0390	0.8819	Spermidine/spermine synthases family	nicotine biosynthesis
MSTRG.139698	Nitab4.5_0001029g0080	0.8522	CO dehydrogenase flavoprotein-like, FAD-binding, subdomain 2, FAD linked oxidase, N-terminal, FAD-binding, type 2, subdomain 1, FAD-binding, type 2	nicotine biosynthesis
MSTRG.139703	Nitab4.5_0004816g0010	0.9678	Nicotinate-nucleotide pyrophosphorylase, Quinolinate phosphoribosyl transferase, C-terminal, Quinolinate phosphoribosyl transferase, N-terminal, Aldolase-type TIM barrel, Nicotinate-nucleotide pyrophosphorylase/Putative pyrophosphorylase ModD	nicotine biosynthesis
MSTRG.14015	Nitab4.5_0002115g0020	0.8653	S-adenosylmethionine synthetase, S-adenosylmethionine synthetase, central domain, S-adenosylmethionine synthetase superfamily, S-adenosylmethionine synthetase, C-terminal, S-adenosylmethionine synthetase, conserved site, S-adenosylmethionine synthetase, N-terminal	nicotine biosynthesis
MSTRG.140422	Nitab4.5_0004816g0010	0.9608	Nicotinate-nucleotide pyrophosphorylase, Quinolinate phosphoribosyl transferase, C-terminal, Quinolinate phosphoribosyl transferase, N-terminal, Aldolase-type TIM barrel, Nicotinate-nucleotide pyrophosphorylase/Putative pyrophosphorylase ModD	nicotine biosynthesis
MSTRG.140776	Nitab4.5_0000013g0380	0.9237	Spermidine/spermine synthases family	nicotine biosynthesis	Yes
MSTRG.140776	Nitab4.5_0000025g0290	0.9119	Copper amine oxidase, C-terminal, Copper amine oxidase, N2-terminal, Copper amine oxidase, N3-terminal, Copper amine oxidase, N-terminal, Copper amine oxidase, N2/N3-terminal, Copper amine oxidase	nicotine biosynthesis	Yes
MSTRG.140776	Nitab4.5_0000031g0370	0.9736	NAD(P)-binding domain, NmrA-like	nicotine biosynthesis	Yes
MSTRG.140776	Nitab4.5_0000316g0090	0.9815	CO dehydrogenase flavoprotein-like, FAD-binding, subdomain 2, FAD-binding, type 2, Berberine/berberine-like, FAD-binding, type 2, subdomain 1, FAD linked oxidase, N-terminal	nicotine biosynthesis	Yes
MSTRG.140776	Nitab4.5_0000745g0170	0.8628	S-adenosylmethionine synthetase, central domain, S-adenosylmethionine synthetase, S-adenosylmethionine synthetase, C-terminal, S-adenosylmethionine synthetase, conserved site, S-adenosylmethionine synthetase superfamily, S-adenosylmethionine synthetase, N-terminal	nicotine biosynthesis	Yes
MSTRG.140776	Nitab4.5_0000884g0010	0.9771	NmrA-like, NAD(P)-binding domain	nicotine biosynthesis	Yes
MSTRG.140776	Nitab4.5_0001029g0080	0.9191	CO dehydrogenase flavoprotein-like, FAD-binding, subdomain 2, FAD linked oxidase, N-terminal, FAD-binding, type 2, subdomain 1, FAD-binding, type 2	nicotine biosynthesis	Yes
MSTRG.140776	Nitab4.5_0002338g0020	0.9677	FAD binding domain, L-aspartate oxidase, Fumarate reductase/succinate dehydrogenase flavoprotein-like, C-terminal, Succinate dehydrogenase/fumarate reductase flavoprotein, catalytic domain, FAD-dependent pyridine nucleotide-disulphide oxidoreductase	nicotine biosynthesis	Yes
MSTRG.140776	Nitab4.5_0002522g0070	0.9045	Fe-S metabolism associated domain, SufE-like, Quinolinate synthetase A	nicotine biosynthesis	Yes
MSTRG.140776	Nitab4.5_0003090g0030	0.9479	AP2/ERF domain, DNA-binding domain	nicotine biosynthesis	Yes
MSTRG.140776	Nitab4.5_0003284g0010	0.884	Spermidine/spermine synthases family, Putrescine N-methyltransferase	nicotine biosynthesis	Yes
MSTRG.140776	Nitab4.5_0003284g0040	0.9033	Spermidine/spermine synthases family, Putrescine N-methyltransferase	nicotine biosynthesis	Yes
MSTRG.140776	Nitab4.5_0005830g0010	0.92	Succinate dehydrogenase/fumarate reductase flavoprotein, catalytic domain, Fumarate reductase/succinate dehydrogenase flavoprotein-like, C-terminal, FAD binding domain, L-aspartate oxidase, FAD-dependent pyridine nucleotide-disulphide oxidoreductase	nicotine biosynthesis	Yes
MSTRG.140776	Nitab4.5_0006307g0010	0.9733	CO dehydrogenase flavoprotein-like, FAD-binding, subdomain 2, FAD-binding, type 2, FAD-binding, type 2, subdomain 1, FAD linked oxidase, N-terminal, Berberine/berberine-like	nicotine biosynthesis	Yes
MSTRG.140776	Nitab4.5_0011232g0010	0.9678	Spermidine/spermine synthases family, Putrescine N-methyltransferase	nicotine biosynthesis	Yes
MSTRG.140776	Nitab4.5_0015055g0010	0.974	DNA-binding domain, AP2/ERF domain	nicotine biosynthesis	Yes
MSTRG.140777	Nitab4.5_0000013g0380	0.9532	Spermidine/spermine synthases family	nicotine biosynthesis	Yes
MSTRG.140777	Nitab4.5_0000013g0390	0.89	Spermidine/spermine synthases family	nicotine biosynthesis
MSTRG.140777	Nitab4.5_0000025g0290	0.9411	Copper amine oxidase, C-terminal, Copper amine oxidase, N2-terminal, Copper amine oxidase, N3-terminal, Copper amine oxidase, N-terminal, Copper amine oxidase, N2/N3-terminal, Copper amine oxidase	nicotine biosynthesis	Yes
MSTRG.140777	Nitab4.5_0000031g0370	0.9845	NAD(P)-binding domain, NmrA-like	nicotine biosynthesis	Yes
MSTRG.140777	Nitab4.5_0000316g0090	0.9714	CO dehydrogenase flavoprotein-like, FAD-binding, subdomain 2, FAD-binding, type 2, Berberine/berberine-like, FAD-binding, type 2, subdomain 1, FAD linked oxidase, N-terminal	nicotine biosynthesis	Yes
MSTRG.140777	Nitab4.5_0000884g0010	0.989	NmrA-like, NAD(P)-binding domain	nicotine biosynthesis	Yes
MSTRG.140777	Nitab4.5_0001029g0080	0.9002	CO dehydrogenase flavoprotein-like, FAD-binding, subdomain 2, FAD linked oxidase, N-terminal, FAD-binding, type 2, subdomain 1, FAD-binding, type 2	nicotine biosynthesis	Yes
MSTRG.140777	Nitab4.5_0002338g0020	0.9831	FAD binding domain, L-aspartate oxidase, Fumarate reductase/succinate dehydrogenase flavoprotein-like, C-terminal, Succinate dehydrogenase/fumarate reductase flavoprotein, catalytic domain, FAD-dependent pyridine nucleotide-disulphide oxidoreductase	nicotine biosynthesis	Yes
MSTRG.140777	Nitab4.5_0002522g0070	0.9106	Fe-S metabolism associated domain, SufE-like, Quinolinate synthetase A	nicotine biosynthesis	Yes
MSTRG.140777	Nitab4.5_0003090g0030	0.9716	AP2/ERF domain, DNA-binding domain	nicotine biosynthesis	Yes
MSTRG.140777	Nitab4.5_0003284g0010	0.922	Spermidine/spermine synthases family, Putrescine N-methyltransferase	nicotine biosynthesis	Yes
MSTRG.140777	Nitab4.5_0003284g0040	0.936	Spermidine/spermine synthases family, Putrescine N-methyltransferase	nicotine biosynthesis	Yes
MSTRG.140777	Nitab4.5_0005830g0010	0.9425	Succinate dehydrogenase/fumarate reductase flavoprotein, catalytic domain, Fumarate reductase/succinate dehydrogenase flavoprotein-like, C-terminal, FAD binding domain, L-aspartate oxidase, FAD-dependent pyridine nucleotide-disulphide oxidoreductase	nicotine biosynthesis	Yes
MSTRG.140777	Nitab4.5_0006307g0010	0.9822	CO dehydrogenase flavoprotein-like, FAD-binding, subdomain 2, FAD-binding, type 2, FAD-binding, type 2, subdomain 1, FAD linked oxidase, N-terminal, Berberine/berberine-like	nicotine biosynthesis	Yes
MSTRG.140777	Nitab4.5_0011232g0010	0.9832	Spermidine/spermine synthases family, Putrescine N-methyltransferase	nicotine biosynthesis	Yes
MSTRG.140777	Nitab4.5_0015055g0010	0.9826	DNA-binding domain, AP2/ERF domain	nicotine biosynthesis	Yes
MSTRG.140864	Nitab4.5_0000003g0720	0.8954	Copper amine oxidase, N2-terminal, Copper amine oxidase, Copper amine oxidase, C-terminal, Copper amine oxidase, N-terminal, Copper amine oxidase, N2/N3-terminal, Copper amine oxidase, N3-terminal	nicotine biosynthesis
MSTRG.141043	Nitab4.5_0000745g0170	0.8645	S-adenosylmethionine synthetase, central domain, S-adenosylmethionine synthetase, S-adenosylmethionine synthetase, C-terminal, S-adenosylmethionine synthetase, conserved site, S-adenosylmethionine synthetase superfamily, S-adenosylmethionine synthetase, N-terminal	nicotine biosynthesis
MSTRG.141059	Nitab4.5_0003646g0010	0.8839	Spermidine/spermine synthases family	nicotine biosynthesis
MSTRG.141117	Nitab4.5_0000013g0380	0.8617	Spermidine/spermine synthases family	nicotine biosynthesis
MSTRG.141117	Nitab4.5_0000013g0390	0.8727	Spermidine/spermine synthases family	nicotine biosynthesis
MSTRG.141117	Nitab4.5_0000025g0290	0.8785	Copper amine oxidase, C-terminal, Copper amine oxidase, N2-terminal, Copper amine oxidase, N3-terminal, Copper amine oxidase, N-terminal, Copper amine oxidase, N2/N3-terminal, Copper amine oxidase	nicotine biosynthesis
MSTRG.141117	Nitab4.5_0003090g0030	0.858	AP2/ERF domain, DNA-binding domain	nicotine biosynthesis
MSTRG.141117	Nitab4.5_0003284g0010	0.8714	Spermidine/spermine synthases family, Putrescine N-methyltransferase	nicotine biosynthesis
MSTRG.141117	Nitab4.5_0003284g0040	0.8571	Spermidine/spermine synthases family, Putrescine N-methyltransferase	nicotine biosynthesis
MSTRG.14120	Nitab4.5_0000013g0390	0.8848	Spermidine/spermine synthases family	nicotine biosynthesis
MSTRG.14120	Nitab4.5_0003284g0010	0.8512	Spermidine/spermine synthases family, Putrescine N-methyltransferase	nicotine biosynthesis
MSTRG.141239	Nitab4.5_0000013g0380	0.9445	Spermidine/spermine synthases family	nicotine biosynthesis	Yes
MSTRG.141239	Nitab4.5_0000013g0390	0.9509	Spermidine/spermine synthases family	nicotine biosynthesis
MSTRG.141239	Nitab4.5_0000025g0290	0.9475	Copper amine oxidase, C-terminal, Copper amine oxidase, N2-terminal, Copper amine oxidase, N3-terminal, Copper amine oxidase, N-terminal, Copper amine oxidase, N2/N3-terminal, Copper amine oxidase	nicotine biosynthesis	Yes
MSTRG.141239	Nitab4.5_0000031g0370	0.9078	NAD(P)-binding domain, NmrA-like	nicotine biosynthesis	Yes
MSTRG.141239	Nitab4.5_0000884g0010	0.9215	NmrA-like, NAD(P)-binding domain	nicotine biosynthesis	Yes
MSTRG.141239	Nitab4.5_0002338g0020	0.9248	FAD binding domain, L-aspartate oxidase, Fumarate reductase/succinate dehydrogenase flavoprotein-like, C-terminal, Succinate dehydrogenase/fumarate reductase flavoprotein, catalytic domain, FAD-dependent pyridine nucleotide-disulphide oxidoreductase	nicotine biosynthesis	Yes
MSTRG.141239	Nitab4.5_0003090g0030	0.9455	AP2/ERF domain, DNA-binding domain	nicotine biosynthesis	Yes
MSTRG.141239	Nitab4.5_0003284g0010	0.9471	Spermidine/spermine synthases family, Putrescine N-methyltransferase	nicotine biosynthesis	Yes
MSTRG.141239	Nitab4.5_0003284g0040	0.9422	Spermidine/spermine synthases family, Putrescine N-methyltransferase	nicotine biosynthesis	Yes
MSTRG.141239	Nitab4.5_0005830g0010	0.9096	Succinate dehydrogenase/fumarate reductase flavoprotein, catalytic domain, Fumarate reductase/succinate dehydrogenase flavoprotein-like, C-terminal, FAD binding domain, L-aspartate oxidase, FAD-dependent pyridine nucleotide-disulphide oxidoreductase	nicotine biosynthesis	Yes
MSTRG.141239	Nitab4.5_0006307g0010	0.9198	CO dehydrogenase flavoprotein-like, FAD-binding, subdomain 2, FAD-binding, type 2, FAD-binding, type 2, subdomain 1, FAD linked oxidase, N-terminal, Berberine/berberine-like	nicotine biosynthesis	Yes
MSTRG.141239	Nitab4.5_0011232g0010	0.9252	Spermidine/spermine synthases family, Putrescine N-methyltransferase	nicotine biosynthesis	Yes
MSTRG.141239	Nitab4.5_0015055g0010	0.8984	DNA-binding domain, AP2/ERF domain	nicotine biosynthesis	Yes
MSTRG.141255	Nitab4.5_0000031g0370	0.8649	NAD(P)-binding domain, NmrA-like	nicotine biosynthesis
MSTRG.141255	Nitab4.5_0000316g0090	0.9115	CO dehydrogenase flavoprotein-like, FAD-binding, subdomain 2, FAD-binding, type 2, Berberine/berberine-like, FAD-binding, type 2, subdomain 1, FAD linked oxidase, N-terminal	nicotine biosynthesis
MSTRG.141255	Nitab4.5_0000884g0010	0.8637	NmrA-like, NAD(P)-binding domain	nicotine biosynthesis
MSTRG.141255	Nitab4.5_0002338g0020	0.8531	FAD binding domain, L-aspartate oxidase, Fumarate reductase/succinate dehydrogenase flavoprotein-like, C-terminal, Succinate dehydrogenase/fumarate reductase flavoprotein, catalytic domain, FAD-dependent pyridine nucleotide-disulphide oxidoreductase	nicotine biosynthesis
MSTRG.141255	Nitab4.5_0006307g0010	0.8668	CO dehydrogenase flavoprotein-like, FAD-binding, subdomain 2, FAD-binding, type 2, FAD-binding, type 2, subdomain 1, FAD linked oxidase, N-terminal, Berberine/berberine-like	nicotine biosynthesis
MSTRG.141255	Nitab4.5_0011232g0010	0.8509	Spermidine/spermine synthases family, Putrescine N-methyltransferase	nicotine biosynthesis
MSTRG.141255	Nitab4.5_0015055g0010	0.8701	DNA-binding domain, AP2/ERF domain	nicotine biosynthesis
MSTRG.141274	Nitab4.5_0000113g0030	0.855	Spermidine/spermine synthases family	nicotine biosynthesis
MSTRG.141274	Nitab4.5_0010954g0020	0.8559	Spermidine/spermine synthases family	nicotine biosynthesis
MSTRG.141482	Nitab4.5_0003090g0030	0.8504	AP2/ERF domain, DNA-binding domain	nicotine biosynthesis	Yes
MSTRG.141482	Nitab4.5_0005830g0010	0.8821	Succinate dehydrogenase/fumarate reductase flavoprotein, catalytic domain, Fumarate reductase/succinate dehydrogenase flavoprotein-like, C-terminal, FAD binding domain, L-aspartate oxidase, FAD-dependent pyridine nucleotide-disulphide oxidoreductase	nicotine biosynthesis	Yes
MSTRG.141482	Nitab4.5_0006307g0010	0.8577	CO dehydrogenase flavoprotein-like, FAD-binding, subdomain 2, FAD-binding, type 2, FAD-binding, type 2, subdomain 1, FAD linked oxidase, N-terminal, Berberine/berberine-like	nicotine biosynthesis	Yes
MSTRG.141522	Nitab4.5_0000013g0380	0.9298	Spermidine/spermine synthases family	nicotine biosynthesis	Yes
MSTRG.141522	Nitab4.5_0000013g0390	0.8587	Spermidine/spermine synthases family	nicotine biosynthesis
MSTRG.141522	Nitab4.5_0000025g0290	0.9142	Copper amine oxidase, C-terminal, Copper amine oxidase, N2-terminal, Copper amine oxidase, N3-terminal, Copper amine oxidase, N-terminal, Copper amine oxidase, N2/N3-terminal, Copper amine oxidase	nicotine biosynthesis	Yes
MSTRG.141522	Nitab4.5_0000031g0370	0.9677	NAD(P)-binding domain, NmrA-like	nicotine biosynthesis	Yes
MSTRG.141522	Nitab4.5_0000316g0090	0.9607	CO dehydrogenase flavoprotein-like, FAD-binding, subdomain 2, FAD-binding, type 2, Berberine/berberine-like, FAD-binding, type 2, subdomain 1, FAD linked oxidase, N-terminal	nicotine biosynthesis	Yes
MSTRG.141522	Nitab4.5_0000884g0010	0.9701	NmrA-like, NAD(P)-binding domain	nicotine biosynthesis	Yes
MSTRG.141522	Nitab4.5_0001029g0080	0.8868	CO dehydrogenase flavoprotein-like, FAD-binding, subdomain 2, FAD linked oxidase, N-terminal, FAD-binding, type 2, subdomain 1, FAD-binding, type 2	nicotine biosynthesis	Yes
MSTRG.141522	Nitab4.5_0002338g0020	0.9649	FAD binding domain, L-aspartate oxidase, Fumarate reductase/succinate dehydrogenase flavoprotein-like, C-terminal, Succinate dehydrogenase/fumarate reductase flavoprotein, catalytic domain, FAD-dependent pyridine nucleotide-disulphide oxidoreductase	nicotine biosynthesis	Yes
MSTRG.141522	Nitab4.5_0002522g0070	0.9109	Fe-S metabolism associated domain, SufE-like, Quinolinate synthetase A	nicotine biosynthesis	Yes
MSTRG.141522	Nitab4.5_0003090g0030	0.9474	AP2/ERF domain, DNA-binding domain	nicotine biosynthesis	Yes
MSTRG.141522	Nitab4.5_0003284g0010	0.8953	Spermidine/spermine synthases family, Putrescine N-methyltransferase	nicotine biosynthesis	Yes
MSTRG.141522	Nitab4.5_0003284g0040	0.9083	Spermidine/spermine synthases family, Putrescine N-methyltransferase	nicotine biosynthesis	Yes
MSTRG.141522	Nitab4.5_0005830g0010	0.9261	Succinate dehydrogenase/fumarate reductase flavoprotein, catalytic domain, Fumarate reductase/succinate dehydrogenase flavoprotein-like, C-terminal, FAD binding domain, L-aspartate oxidase, FAD-dependent pyridine nucleotide-disulphide oxidoreductase	nicotine biosynthesis	Yes
MSTRG.141522	Nitab4.5_0006307g0010	0.9596	CO dehydrogenase flavoprotein-like, FAD-binding, subdomain 2, FAD-binding, type 2, FAD-binding, type 2, subdomain 1, FAD linked oxidase, N-terminal, Berberine/berberine-like	nicotine biosynthesis	Yes
MSTRG.141522	Nitab4.5_0011232g0010	0.9633	Spermidine/spermine synthases family, Putrescine N-methyltransferase	nicotine biosynthesis	Yes
MSTRG.141522	Nitab4.5_0015055g0010	0.9653	DNA-binding domain, AP2/ERF domain	nicotine biosynthesis	Yes
MSTRG.141524	Nitab4.5_0000031g0370	0.8622	NAD(P)-binding domain, NmrA-like	nicotine biosynthesis	Yes
MSTRG.141524	Nitab4.5_0000316g0090	0.8959	CO dehydrogenase flavoprotein-like, FAD-binding, subdomain 2, FAD-binding, type 2, Berberine/berberine-like, FAD-binding, type 2, subdomain 1, FAD linked oxidase, N-terminal	nicotine biosynthesis	Yes
MSTRG.141524	Nitab4.5_0000745g0170	0.8627	S-adenosylmethionine synthetase, central domain, S-adenosylmethionine synthetase, S-adenosylmethionine synthetase, C-terminal, S-adenosylmethionine synthetase, conserved site, S-adenosylmethionine synthetase superfamily, S-adenosylmethionine synthetase, N-terminal	nicotine biosynthesis	Yes
MSTRG.141524	Nitab4.5_0000884g0010	0.8733	NmrA-like, NAD(P)-binding domain	nicotine biosynthesis	Yes
MSTRG.141524	Nitab4.5_0001029g0080	0.8933	CO dehydrogenase flavoprotein-like, FAD-binding, subdomain 2, FAD linked oxidase, N-terminal, FAD-binding, type 2, subdomain 1, FAD-binding, type 2	nicotine biosynthesis	Yes
MSTRG.141524	Nitab4.5_0001965g0070	0.8648	S-adenosylmethionine decarboxylase, S-adenosylmethionine decarboxylase, conserved site, S-adenosylmethionine decarboxylase subgroup, S-adenosyl-l-methionine decarboxylase leader peptide, S-adenosylmethionine decarboxylase, core	nicotine biosynthesis	Yes
MSTRG.141524	Nitab4.5_0002338g0020	0.8615	FAD binding domain, L-aspartate oxidase, Fumarate reductase/succinate dehydrogenase flavoprotein-like, C-terminal, Succinate dehydrogenase/fumarate reductase flavoprotein, catalytic domain, FAD-dependent pyridine nucleotide-disulphide oxidoreductase	nicotine biosynthesis	Yes
MSTRG.141524	Nitab4.5_0006307g0010	0.8955	CO dehydrogenase flavoprotein-like, FAD-binding, subdomain 2, FAD-binding, type 2, FAD-binding, type 2, subdomain 1, FAD linked oxidase, N-terminal, Berberine/berberine-like	nicotine biosynthesis	Yes
MSTRG.141524	Nitab4.5_0011232g0010	0.8594	Spermidine/spermine synthases family, Putrescine N-methyltransferase	nicotine biosynthesis	Yes
MSTRG.141524	Nitab4.5_0015055g0010	0.8694	DNA-binding domain, AP2/ERF domain	nicotine biosynthesis	Yes
MSTRG.14156	Nitab4.5_0004816g0010	0.9828	Nicotinate-nucleotide pyrophosphorylase, Quinolinate phosphoribosyl transferase, C-terminal, Quinolinate phosphoribosyl transferase, N-terminal, Aldolase-type TIM barrel, Nicotinate-nucleotide pyrophosphorylase/Putative pyrophosphorylase ModD	nicotine biosynthesis
MSTRG.142130	Nitab4.5_0000316g0090	0.899	CO dehydrogenase flavoprotein-like, FAD-binding, subdomain 2, FAD-binding, type 2, Berberine/berberine-like, FAD-binding, type 2, subdomain 1, FAD linked oxidase, N-terminal	nicotine biosynthesis	Yes
MSTRG.142130	Nitab4.5_0000745g0170	0.8583	S-adenosylmethionine synthetase, central domain, S-adenosylmethionine synthetase, S-adenosylmethionine synthetase, C-terminal, S-adenosylmethionine synthetase, conserved site, S-adenosylmethionine synthetase superfamily, S-adenosylmethionine synthetase, N-terminal	nicotine biosynthesis	Yes
MSTRG.142130	Nitab4.5_0000884g0010	0.8549	NmrA-like, NAD(P)-binding domain	nicotine biosynthesis	Yes
MSTRG.142130	Nitab4.5_0001029g0080	0.9202	CO dehydrogenase flavoprotein-like, FAD-binding, subdomain 2, FAD linked oxidase, N-terminal, FAD-binding, type 2, subdomain 1, FAD-binding, type 2	nicotine biosynthesis	Yes
MSTRG.142130	Nitab4.5_0006307g0010	0.8769	CO dehydrogenase flavoprotein-like, FAD-binding, subdomain 2, FAD-binding, type 2, FAD-binding, type 2, subdomain 1, FAD linked oxidase, N-terminal, Berberine/berberine-like	nicotine biosynthesis	Yes
MSTRG.142130	Nitab4.5_0015055g0010	0.8554	DNA-binding domain, AP2/ERF domain	nicotine biosynthesis	Yes
MSTRG.142439	Nitab4.5_0000031g0370	0.8531	NAD(P)-binding domain, NmrA-like	nicotine biosynthesis	Yes
MSTRG.142439	Nitab4.5_0000316g0090	0.9262	CO dehydrogenase flavoprotein-like, FAD-binding, subdomain 2, FAD-binding, type 2, Berberine/berberine-like, FAD-binding, type 2, subdomain 1, FAD linked oxidase, N-terminal	nicotine biosynthesis	Yes
MSTRG.142439	Nitab4.5_0000745g0170	0.8625	S-adenosylmethionine synthetase, central domain, S-adenosylmethionine synthetase, S-adenosylmethionine synthetase, C-terminal, S-adenosylmethionine synthetase, conserved site, S-adenosylmethionine synthetase superfamily, S-adenosylmethionine synthetase, N-terminal	nicotine biosynthesis	Yes
MSTRG.142439	Nitab4.5_0000884g0010	0.8547	NmrA-like, NAD(P)-binding domain	nicotine biosynthesis	Yes
MSTRG.142439	Nitab4.5_0001029g0080	0.8886	CO dehydrogenase flavoprotein-like, FAD-binding, subdomain 2, FAD linked oxidase, N-terminal, FAD-binding, type 2, subdomain 1, FAD-binding, type 2	nicotine biosynthesis	Yes
MSTRG.142439	Nitab4.5_0004665g0010	0.8759	S-adenosylmethionine synthetase, conserved site, S-adenosylmethionine synthetase, S-adenosylmethionine synthetase superfamily, S-adenosylmethionine synthetase, C-terminal, S-adenosylmethionine synthetase, central domain, S-adenosylmethionine synthetase, N-terminal	nicotine biosynthesis
MSTRG.142439	Nitab4.5_0006307g0010	0.8803	CO dehydrogenase flavoprotein-like, FAD-binding, subdomain 2, FAD-binding, type 2, FAD-binding, type 2, subdomain 1, FAD linked oxidase, N-terminal, Berberine/berberine-like	nicotine biosynthesis	Yes
MSTRG.142439	Nitab4.5_0015055g0010	0.8681	DNA-binding domain, AP2/ERF domain	nicotine biosynthesis	Yes
MSTRG.142478	Nitab4.5_0000063g0120	0.9026	S-adenosylmethionine synthetase, conserved site, S-adenosylmethionine synthetase superfamily, S-adenosylmethionine synthetase, N-terminal, S-adenosylmethionine synthetase, S-adenosylmethionine synthetase, C-terminal, S-adenosylmethionine synthetase, central domain	nicotine biosynthesis	Yes
MSTRG.142478	Nitab4.5_0000063g0170	0.8568	similar to S-adenosylmethionine synthase 2	nicotine biosynthesis	Yes
MSTRG.142478	Nitab4.5_0001029g0080	0.8965	CO dehydrogenase flavoprotein-like, FAD-binding, subdomain 2, FAD linked oxidase, N-terminal, FAD-binding, type 2, subdomain 1, FAD-binding, type 2	nicotine biosynthesis	Yes
MSTRG.142673	Nitab4.5_0004816g0010	0.8905	Nicotinate-nucleotide pyrophosphorylase, Quinolinate phosphoribosyl transferase, C-terminal, Quinolinate phosphoribosyl transferase, N-terminal, Aldolase-type TIM barrel, Nicotinate-nucleotide pyrophosphorylase/Putative pyrophosphorylase ModD	nicotine biosynthesis
MSTRG.142713	Nitab4.5_0002115g0020	0.8549	S-adenosylmethionine synthetase, S-adenosylmethionine synthetase, central domain, S-adenosylmethionine synthetase superfamily, S-adenosylmethionine synthetase, C-terminal, S-adenosylmethionine synthetase, conserved site, S-adenosylmethionine synthetase, N-terminal	nicotine biosynthesis
MSTRG.142713	Nitab4.5_0008624g0040	0.8895	S-adenosylmethionine synthetase, S-adenosylmethionine synthetase, N-terminal, S-adenosylmethionine synthetase superfamily, S-adenosylmethionine synthetase, conserved site, S-adenosylmethionine synthetase, C-terminal, S-adenosylmethionine synthetase, central domain	nicotine biosynthesis
MSTRG.14338	Nitab4.5_0004816g0010	0.9775	Nicotinate-nucleotide pyrophosphorylase, Quinolinate phosphoribosyl transferase, C-terminal, Quinolinate phosphoribosyl transferase, N-terminal, Aldolase-type TIM barrel, Nicotinate-nucleotide pyrophosphorylase/Putative pyrophosphorylase ModD	nicotine biosynthesis
MSTRG.143854	Nitab4.5_0004816g0010	0.9547	Nicotinate-nucleotide pyrophosphorylase, Quinolinate phosphoribosyl transferase, C-terminal, Quinolinate phosphoribosyl transferase, N-terminal, Aldolase-type TIM barrel, Nicotinate-nucleotide pyrophosphorylase/Putative pyrophosphorylase ModD	nicotine biosynthesis
MSTRG.143921	Nitab4.5_0000063g0120	0.8706	S-adenosylmethionine synthetase, conserved site, S-adenosylmethionine synthetase superfamily, S-adenosylmethionine synthetase, N-terminal, S-adenosylmethionine synthetase, S-adenosylmethionine synthetase, C-terminal, S-adenosylmethionine synthetase, central domain	nicotine biosynthesis	Yes
MSTRG.143921	Nitab4.5_0000316g0090	0.8613	CO dehydrogenase flavoprotein-like, FAD-binding, subdomain 2, FAD-binding, type 2, Berberine/berberine-like, FAD-binding, type 2, subdomain 1, FAD linked oxidase, N-terminal	nicotine biosynthesis	Yes
MSTRG.143921	Nitab4.5_0000745g0170	0.8868	S-adenosylmethionine synthetase, central domain, S-adenosylmethionine synthetase, S-adenosylmethionine synthetase, C-terminal, S-adenosylmethionine synthetase, conserved site, S-adenosylmethionine synthetase superfamily, S-adenosylmethionine synthetase, N-terminal	nicotine biosynthesis	Yes
MSTRG.143921	Nitab4.5_0000884g0010	0.8593	NmrA-like, NAD(P)-binding domain	nicotine biosynthesis	Yes
MSTRG.143921	Nitab4.5_0001029g0080	0.9535	CO dehydrogenase flavoprotein-like, FAD-binding, subdomain 2, FAD linked oxidase, N-terminal, FAD-binding, type 2, subdomain 1, FAD-binding, type 2	nicotine biosynthesis	Yes
MSTRG.143921	Nitab4.5_0006307g0010	0.8555	CO dehydrogenase flavoprotein-like, FAD-binding, subdomain 2, FAD-binding, type 2, FAD-binding, type 2, subdomain 1, FAD linked oxidase, N-terminal, Berberine/berberine-like	nicotine biosynthesis	Yes
MSTRG.144202	Nitab4.5_0004816g0010	0.9589	Nicotinate-nucleotide pyrophosphorylase, Quinolinate phosphoribosyl transferase, C-terminal, Quinolinate phosphoribosyl transferase, N-terminal, Aldolase-type TIM barrel, Nicotinate-nucleotide pyrophosphorylase/Putative pyrophosphorylase ModD	nicotine biosynthesis
MSTRG.144557	Nitab4.5_0000316g0090	0.8519	CO dehydrogenase flavoprotein-like, FAD-binding, subdomain 2, FAD-binding, type 2, Berberine/berberine-like, FAD-binding, type 2, subdomain 1, FAD linked oxidase, N-terminal	nicotine biosynthesis	Yes
MSTRG.144557	Nitab4.5_0000745g0170	0.8672	S-adenosylmethionine synthetase, central domain, S-adenosylmethionine synthetase, S-adenosylmethionine synthetase, C-terminal, S-adenosylmethionine synthetase, conserved site, S-adenosylmethionine synthetase superfamily, S-adenosylmethionine synthetase, N-terminal	nicotine biosynthesis	Yes
MSTRG.144557	Nitab4.5_0001029g0080	0.8839	CO dehydrogenase flavoprotein-like, FAD-binding, subdomain 2, FAD linked oxidase, N-terminal, FAD-binding, type 2, subdomain 1, FAD-binding, type 2	nicotine biosynthesis	Yes
MSTRG.144557	Nitab4.5_0003029g0030	0.8524	FAD-binding, type 2, subdomain 1, FAD linked oxidase, N-terminal, FAD-binding, type 2, Berberine/berberine-like	nicotine biosynthesis
MSTRG.14463	Nitab4.5_0004816g0010	0.9743	Nicotinate-nucleotide pyrophosphorylase, Quinolinate phosphoribosyl transferase, C-terminal, Quinolinate phosphoribosyl transferase, N-terminal, Aldolase-type TIM barrel, Nicotinate-nucleotide pyrophosphorylase/Putative pyrophosphorylase ModD	nicotine biosynthesis
MSTRG.145024	Nitab4.5_0002115g0020	0.8956	S-adenosylmethionine synthetase, S-adenosylmethionine synthetase, central domain, S-adenosylmethionine synthetase superfamily, S-adenosylmethionine synthetase, C-terminal, S-adenosylmethionine synthetase, conserved site, S-adenosylmethionine synthetase, N-terminal	nicotine biosynthesis
MSTRG.145034	Nitab4.5_0000316g0090	0.8917	CO dehydrogenase flavoprotein-like, FAD-binding, subdomain 2, FAD-binding, type 2, Berberine/berberine-like, FAD-binding, type 2, subdomain 1, FAD linked oxidase, N-terminal	nicotine biosynthesis	Yes
MSTRG.145034	Nitab4.5_0000745g0170	0.8664	S-adenosylmethionine synthetase, central domain, S-adenosylmethionine synthetase, S-adenosylmethionine synthetase, C-terminal, S-adenosylmethionine synthetase, conserved site, S-adenosylmethionine synthetase superfamily, S-adenosylmethionine synthetase, N-terminal	nicotine biosynthesis	Yes
MSTRG.145034	Nitab4.5_0000884g0010	0.8538	NmrA-like, NAD(P)-binding domain	nicotine biosynthesis	Yes
MSTRG.145034	Nitab4.5_0001029g0080	0.9307	CO dehydrogenase flavoprotein-like, FAD-binding, subdomain 2, FAD linked oxidase, N-terminal, FAD-binding, type 2, subdomain 1, FAD-binding, type 2	nicotine biosynthesis	Yes
MSTRG.145034	Nitab4.5_0006307g0010	0.8581	CO dehydrogenase flavoprotein-like, FAD-binding, subdomain 2, FAD-binding, type 2, FAD-binding, type 2, subdomain 1, FAD linked oxidase, N-terminal, Berberine/berberine-like	nicotine biosynthesis	Yes
MSTRG.145034	Nitab4.5_0015055g0010	0.8599	DNA-binding domain, AP2/ERF domain	nicotine biosynthesis	Yes
MSTRG.145110	Nitab4.5_0000063g0120	0.8653	S-adenosylmethionine synthetase, conserved site, S-adenosylmethionine synthetase superfamily, S-adenosylmethionine synthetase, N-terminal, S-adenosylmethionine synthetase, S-adenosylmethionine synthetase, C-terminal, S-adenosylmethionine synthetase, central domain	nicotine biosynthesis	Yes
MSTRG.145110	Nitab4.5_0004665g0010	0.8589	S-adenosylmethionine synthetase, conserved site, S-adenosylmethionine synthetase, S-adenosylmethionine synthetase superfamily, S-adenosylmethionine synthetase, C-terminal, S-adenosylmethionine synthetase, central domain, S-adenosylmethionine synthetase, N-terminal	nicotine biosynthesis
MSTRG.145174	Nitab4.5_0002115g0020	0.8504	S-adenosylmethionine synthetase, S-adenosylmethionine synthetase, central domain, S-adenosylmethionine synthetase superfamily, S-adenosylmethionine synthetase, C-terminal, S-adenosylmethionine synthetase, conserved site, S-adenosylmethionine synthetase, N-terminal	nicotine biosynthesis
MSTRG.145421	Nitab4.5_0004816g0010	0.8719	Nicotinate-nucleotide pyrophosphorylase, Quinolinate phosphoribosyl transferase, C-terminal, Quinolinate phosphoribosyl transferase, N-terminal, Aldolase-type TIM barrel, Nicotinate-nucleotide pyrophosphorylase/Putative pyrophosphorylase ModD	nicotine biosynthesis
MSTRG.145422	Nitab4.5_0004816g0010	0.8564	Nicotinate-nucleotide pyrophosphorylase, Quinolinate phosphoribosyl transferase, C-terminal, Quinolinate phosphoribosyl transferase, N-terminal, Aldolase-type TIM barrel, Nicotinate-nucleotide pyrophosphorylase/Putative pyrophosphorylase ModD	nicotine biosynthesis
MSTRG.145493	Nitab4.5_0000034g0230	0.8741	Spermidine/spermine synthases family	nicotine biosynthesis
MSTRG.145493	Nitab4.5_0003280g0010	0.8791	Alanine racemase/group IV decarboxylase, C-terminal, Orn/DAP/Arg decarboxylase 2, N-terminal, Ornithine/DAP/Arg decarboxylase, Orn/DAP/Arg decarboxylase 2, conserved site, Orn/DAP/Arg decarboxylase 2, pyridoxal-phosphate binding site, Orn/DAP/Arg decarboxylase 2, C-terminal, Ornithine decarboxylase	nicotine biosynthesis
MSTRG.145585	Nitab4.5_0010630g0010	0.8507	Orn/DAP/Arg decarboxylase 2, C-terminal, Orn/DAP/Arg decarboxylase 2, conserved site, Ornithine/DAP/Arg decarboxylase, Orn/DAP/Arg decarboxylase 2, pyridoxal-phosphate binding site, Orn/DAP/Arg decarboxylase 2, N-terminal, Arginine decarboxylase, Alanine racemase/group IV decarboxylase, C-terminal	nicotine biosynthesis
MSTRG.145837	Nitab4.5_0000003g0720	0.8531	Copper amine oxidase, N2-terminal, Copper amine oxidase, Copper amine oxidase, C-terminal, Copper amine oxidase, N-terminal, Copper amine oxidase, N2/N3-terminal, Copper amine oxidase, N3-terminal	nicotine biosynthesis
MSTRG.145885	Nitab4.5_0000063g0120	0.9453	S-adenosylmethionine synthetase, conserved site, S-adenosylmethionine synthetase superfamily, S-adenosylmethionine synthetase, N-terminal, S-adenosylmethionine synthetase, S-adenosylmethionine synthetase, C-terminal, S-adenosylmethionine synthetase, central domain	nicotine biosynthesis
MSTRG.145885	Nitab4.5_0000745g0170	0.8662	S-adenosylmethionine synthetase, central domain, S-adenosylmethionine synthetase, S-adenosylmethionine synthetase, C-terminal, S-adenosylmethionine synthetase, conserved site, S-adenosylmethionine synthetase superfamily, S-adenosylmethionine synthetase, N-terminal	nicotine biosynthesis
MSTRG.145885	Nitab4.5_0000814g0090	0.862	S-adenosylmethionine synthetase superfamily, S-adenosylmethionine synthetase, N-terminal, S-adenosylmethionine synthetase, C-terminal, S-adenosylmethionine synthetase, S-adenosylmethionine synthetase, conserved site, S-adenosylmethionine synthetase, central domain	nicotine biosynthesis
MSTRG.145902	Nitab4.5_0004816g0010	0.8567	Nicotinate-nucleotide pyrophosphorylase, Quinolinate phosphoribosyl transferase, C-terminal, Quinolinate phosphoribosyl transferase, N-terminal, Aldolase-type TIM barrel, Nicotinate-nucleotide pyrophosphorylase/Putative pyrophosphorylase ModD	nicotine biosynthesis
MSTRG.146111	Nitab4.5_0000155g0200	0.882	S-adenosylmethionine synthetase superfamily, S-adenosylmethionine synthetase, conserved site, S-adenosylmethionine synthetase, S-adenosylmethionine synthetase, N-terminal, S-adenosylmethionine synthetase, central domain, S-adenosylmethionine synthetase, C-terminal	nicotine biosynthesis
MSTRG.14645	Nitab4.5_0000013g0380	0.8761	Spermidine/spermine synthases family	nicotine biosynthesis	Yes
MSTRG.14645	Nitab4.5_0000025g0290	0.8628	Copper amine oxidase, C-terminal, Copper amine oxidase, N2-terminal, Copper amine oxidase, N3-terminal, Copper amine oxidase, N-terminal, Copper amine oxidase, N2/N3-terminal, Copper amine oxidase	nicotine biosynthesis	Yes
MSTRG.14645	Nitab4.5_0000031g0370	0.9367	NAD(P)-binding domain, NmrA-like	nicotine biosynthesis	Yes
MSTRG.14645	Nitab4.5_0000316g0090	0.9554	CO dehydrogenase flavoprotein-like, FAD-binding, subdomain 2, FAD-binding, type 2, Berberine/berberine-like, FAD-binding, type 2, subdomain 1, FAD linked oxidase, N-terminal	nicotine biosynthesis	Yes
MSTRG.14645	Nitab4.5_0000745g0170	0.8886	S-adenosylmethionine synthetase, central domain, S-adenosylmethionine synthetase, S-adenosylmethionine synthetase, C-terminal, S-adenosylmethionine synthetase, conserved site, S-adenosylmethionine synthetase superfamily, S-adenosylmethionine synthetase, N-terminal	nicotine biosynthesis	Yes
MSTRG.14645	Nitab4.5_0000884g0010	0.9408	NmrA-like, NAD(P)-binding domain	nicotine biosynthesis	Yes
MSTRG.14645	Nitab4.5_0001029g0080	0.9402	CO dehydrogenase flavoprotein-like, FAD-binding, subdomain 2, FAD linked oxidase, N-terminal, FAD-binding, type 2, subdomain 1, FAD-binding, type 2	nicotine biosynthesis	Yes
MSTRG.14645	Nitab4.5_0001965g0070	0.8702	S-adenosylmethionine decarboxylase, S-adenosylmethionine decarboxylase, conserved site, S-adenosylmethionine decarboxylase subgroup, S-adenosyl-l-methionine decarboxylase leader peptide, S-adenosylmethionine decarboxylase, core	nicotine biosynthesis	Yes
MSTRG.14645	Nitab4.5_0002338g0020	0.9277	FAD binding domain, L-aspartate oxidase, Fumarate reductase/succinate dehydrogenase flavoprotein-like, C-terminal, Succinate dehydrogenase/fumarate reductase flavoprotein, catalytic domain, FAD-dependent pyridine nucleotide-disulphide oxidoreductase	nicotine biosynthesis	Yes
MSTRG.14645	Nitab4.5_0002522g0070	0.866	Fe-S metabolism associated domain, SufE-like, Quinolinate synthetase A	nicotine biosynthesis	Yes
MSTRG.14645	Nitab4.5_0003090g0030	0.9032	AP2/ERF domain, DNA-binding domain	nicotine biosynthesis	Yes
MSTRG.14645	Nitab4.5_0003284g0040	0.8507	Spermidine/spermine synthases family, Putrescine N-methyltransferase	nicotine biosynthesis	Yes
MSTRG.14645	Nitab4.5_0005830g0010	0.8654	Succinate dehydrogenase/fumarate reductase flavoprotein, catalytic domain, Fumarate reductase/succinate dehydrogenase flavoprotein-like, C-terminal, FAD binding domain, L-aspartate oxidase, FAD-dependent pyridine nucleotide-disulphide oxidoreductase	nicotine biosynthesis	Yes
MSTRG.14645	Nitab4.5_0006307g0010	0.9337	CO dehydrogenase flavoprotein-like, FAD-binding, subdomain 2, FAD-binding, type 2, FAD-binding, type 2, subdomain 1, FAD linked oxidase, N-terminal, Berberine/berberine-like	nicotine biosynthesis	Yes
MSTRG.14645	Nitab4.5_0011232g0010	0.9278	Spermidine/spermine synthases family, Putrescine N-methyltransferase	nicotine biosynthesis	Yes
MSTRG.14645	Nitab4.5_0015055g0010	0.9374	DNA-binding domain, AP2/ERF domain	nicotine biosynthesis	Yes
MSTRG.146595	Nitab4.5_0000003g0720	0.8567	Copper amine oxidase, N2-terminal, Copper amine oxidase, Copper amine oxidase, C-terminal, Copper amine oxidase, N-terminal, Copper amine oxidase, N2/N3-terminal, Copper amine oxidase, N3-terminal	nicotine biosynthesis
MSTRG.146809	Nitab4.5_0002115g0020	0.8524	S-adenosylmethionine synthetase, S-adenosylmethionine synthetase, central domain, S-adenosylmethionine synthetase superfamily, S-adenosylmethionine synthetase, C-terminal, S-adenosylmethionine synthetase, conserved site, S-adenosylmethionine synthetase, N-terminal	nicotine biosynthesis
MSTRG.147122	Nitab4.5_0000031g0370	0.8537	NAD(P)-binding domain, NmrA-like	nicotine biosynthesis	Yes
MSTRG.147122	Nitab4.5_0000316g0090	0.8547	CO dehydrogenase flavoprotein-like, FAD-binding, subdomain 2, FAD-binding, type 2, Berberine/berberine-like, FAD-binding, type 2, subdomain 1, FAD linked oxidase, N-terminal	nicotine biosynthesis	Yes
MSTRG.147122	Nitab4.5_0000884g0010	0.8586	NmrA-like, NAD(P)-binding domain	nicotine biosynthesis	Yes
MSTRG.147122	Nitab4.5_0001029g0080	0.8559	CO dehydrogenase flavoprotein-like, FAD-binding, subdomain 2, FAD linked oxidase, N-terminal, FAD-binding, type 2, subdomain 1, FAD-binding, type 2	nicotine biosynthesis	Yes
MSTRG.147122	Nitab4.5_0001965g0070	0.8755	S-adenosylmethionine decarboxylase, S-adenosylmethionine decarboxylase, conserved site, S-adenosylmethionine decarboxylase subgroup, S-adenosyl-l-methionine decarboxylase leader peptide, S-adenosylmethionine decarboxylase, core	nicotine biosynthesis	Yes
MSTRG.147122	Nitab4.5_0002338g0020	0.8514	FAD binding domain, L-aspartate oxidase, Fumarate reductase/succinate dehydrogenase flavoprotein-like, C-terminal, Succinate dehydrogenase/fumarate reductase flavoprotein, catalytic domain, FAD-dependent pyridine nucleotide-disulphide oxidoreductase	nicotine biosynthesis	Yes
MSTRG.147122	Nitab4.5_0006307g0010	0.8533	CO dehydrogenase flavoprotein-like, FAD-binding, subdomain 2, FAD-binding, type 2, FAD-binding, type 2, subdomain 1, FAD linked oxidase, N-terminal, Berberine/berberine-like	nicotine biosynthesis	Yes
MSTRG.147122	Nitab4.5_0015055g0010	0.8504	DNA-binding domain, AP2/ERF domain	nicotine biosynthesis	Yes
MSTRG.147316	Nitab4.5_0000013g0390	0.941	Spermidine/spermine synthases family	nicotine biosynthesis
MSTRG.147316	Nitab4.5_0003284g0010	0.8998	Spermidine/spermine synthases family, Putrescine N-methyltransferase	nicotine biosynthesis
MSTRG.147316	Nitab4.5_0003284g0040	0.8625	Spermidine/spermine synthases family, Putrescine N-methyltransferase	nicotine biosynthesis
MSTRG.147901	Nitab4.5_0000031g0370	0.8638	NAD(P)-binding domain, NmrA-like	nicotine biosynthesis	Yes
MSTRG.147901	Nitab4.5_0000884g0010	0.8663	NmrA-like, NAD(P)-binding domain	nicotine biosynthesis	Yes
MSTRG.147901	Nitab4.5_0002338g0020	0.8608	FAD binding domain, L-aspartate oxidase, Fumarate reductase/succinate dehydrogenase flavoprotein-like, C-terminal, Succinate dehydrogenase/fumarate reductase flavoprotein, catalytic domain, FAD-dependent pyridine nucleotide-disulphide oxidoreductase	nicotine biosynthesis	Yes
MSTRG.147901	Nitab4.5_0002522g0070	0.8515	Fe-S metabolism associated domain, SufE-like, Quinolinate synthetase A	nicotine biosynthesis	Yes
MSTRG.147901	Nitab4.5_0006307g0010	0.8523	CO dehydrogenase flavoprotein-like, FAD-binding, subdomain 2, FAD-binding, type 2, FAD-binding, type 2, subdomain 1, FAD linked oxidase, N-terminal, Berberine/berberine-like	nicotine biosynthesis	Yes
MSTRG.147901	Nitab4.5_0011232g0010	0.8618	Spermidine/spermine synthases family, Putrescine N-methyltransferase	nicotine biosynthesis	Yes
MSTRG.147901	Nitab4.5_0015055g0010	0.8635	DNA-binding domain, AP2/ERF domain	nicotine biosynthesis	Yes
MSTRG.148065	Nitab4.5_0000013g0380	0.863	Spermidine/spermine synthases family	nicotine biosynthesis	Yes
MSTRG.148065	Nitab4.5_0000013g0390	0.8542	Spermidine/spermine synthases family	nicotine biosynthesis
MSTRG.148065	Nitab4.5_0000025g0290	0.8739	Copper amine oxidase, C-terminal, Copper amine oxidase, N2-terminal, Copper amine oxidase, N3-terminal, Copper amine oxidase, N-terminal, Copper amine oxidase, N2/N3-terminal, Copper amine oxidase	nicotine biosynthesis	Yes
MSTRG.148065	Nitab4.5_0000884g0010	0.8639	NmrA-like, NAD(P)-binding domain	nicotine biosynthesis	Yes
MSTRG.148065	Nitab4.5_0002338g0020	0.8596	FAD binding domain, L-aspartate oxidase, Fumarate reductase/succinate dehydrogenase flavoprotein-like, C-terminal, Succinate dehydrogenase/fumarate reductase flavoprotein, catalytic domain, FAD-dependent pyridine nucleotide-disulphide oxidoreductase	nicotine biosynthesis	Yes
MSTRG.148065	Nitab4.5_0003090g0030	0.8671	AP2/ERF domain, DNA-binding domain	nicotine biosynthesis	Yes
MSTRG.148065	Nitab4.5_0003284g0010	0.8549	Spermidine/spermine synthases family, Putrescine N-methyltransferase	nicotine biosynthesis	Yes
MSTRG.148065	Nitab4.5_0006307g0010	0.8653	CO dehydrogenase flavoprotein-like, FAD-binding, subdomain 2, FAD-binding, type 2, FAD-binding, type 2, subdomain 1, FAD linked oxidase, N-terminal, Berberine/berberine-like	nicotine biosynthesis	Yes
MSTRG.148065	Nitab4.5_0011232g0010	0.858	Spermidine/spermine synthases family, Putrescine N-methyltransferase	nicotine biosynthesis	Yes
MSTRG.148260	Nitab4.5_0000745g0170	0.8588	S-adenosylmethionine synthetase, central domain, S-adenosylmethionine synthetase, S-adenosylmethionine synthetase, C-terminal, S-adenosylmethionine synthetase, conserved site, S-adenosylmethionine synthetase superfamily, S-adenosylmethionine synthetase, N-terminal	nicotine biosynthesis	Yes
MSTRG.148572	Nitab4.5_0000003g0720	0.8505	Copper amine oxidase, N2-terminal, Copper amine oxidase, Copper amine oxidase, C-terminal, Copper amine oxidase, N-terminal, Copper amine oxidase, N2/N3-terminal, Copper amine oxidase, N3-terminal	nicotine biosynthesis
MSTRG.148649	Nitab4.5_0000013g0390	0.9228	Spermidine/spermine synthases family	nicotine biosynthesis
MSTRG.148649	Nitab4.5_0003284g0010	0.8677	Spermidine/spermine synthases family, Putrescine N-methyltransferase	nicotine biosynthesis
MSTRG.148650	Nitab4.5_0000031g0370	0.8983	NAD(P)-binding domain, NmrA-like	nicotine biosynthesis	Yes
MSTRG.148650	Nitab4.5_0000316g0090	0.9262	CO dehydrogenase flavoprotein-like, FAD-binding, subdomain 2, FAD-binding, type 2, Berberine/berberine-like, FAD-binding, type 2, subdomain 1, FAD linked oxidase, N-terminal	nicotine biosynthesis	Yes
MSTRG.148650	Nitab4.5_0000884g0010	0.8928	NmrA-like, NAD(P)-binding domain	nicotine biosynthesis	Yes
MSTRG.148650	Nitab4.5_0002338g0020	0.8787	FAD binding domain, L-aspartate oxidase, Fumarate reductase/succinate dehydrogenase flavoprotein-like, C-terminal, Succinate dehydrogenase/fumarate reductase flavoprotein, catalytic domain, FAD-dependent pyridine nucleotide-disulphide oxidoreductase	nicotine biosynthesis	Yes
MSTRG.148650	Nitab4.5_0006307g0010	0.8911	CO dehydrogenase flavoprotein-like, FAD-binding, subdomain 2, FAD-binding, type 2, FAD-binding, type 2, subdomain 1, FAD linked oxidase, N-terminal, Berberine/berberine-like	nicotine biosynthesis	Yes
MSTRG.148650	Nitab4.5_0011232g0010	0.8788	Spermidine/spermine synthases family, Putrescine N-methyltransferase	nicotine biosynthesis	Yes
MSTRG.148650	Nitab4.5_0015055g0010	0.9025	DNA-binding domain, AP2/ERF domain	nicotine biosynthesis	Yes
MSTRG.148799	Nitab4.5_0001270g0090	0.8875	Alanine racemase/group IV decarboxylase, C-terminal, Ornithine decarboxylase, Orn/DAP/Arg decarboxylase 2, pyridoxal-phosphate binding site, Orn/DAP/Arg decarboxylase 2, N-terminal, Orn/DAP/Arg decarboxylase 2, C-terminal, Ornithine/DAP/Arg decarboxylase	nicotine biosynthesis
MSTRG.149034	Nitab4.5_0000063g0120	0.8823	S-adenosylmethionine synthetase, conserved site, S-adenosylmethionine synthetase superfamily, S-adenosylmethionine synthetase, N-terminal, S-adenosylmethionine synthetase, S-adenosylmethionine synthetase, C-terminal, S-adenosylmethionine synthetase, central domain	nicotine biosynthesis	Yes
MSTRG.149034	Nitab4.5_0000745g0170	0.9025	S-adenosylmethionine synthetase, central domain, S-adenosylmethionine synthetase, S-adenosylmethionine synthetase, C-terminal, S-adenosylmethionine synthetase, conserved site, S-adenosylmethionine synthetase superfamily, S-adenosylmethionine synthetase, N-terminal	nicotine biosynthesis	Yes
MSTRG.149034	Nitab4.5_0001029g0080	0.9064	CO dehydrogenase flavoprotein-like, FAD-binding, subdomain 2, FAD linked oxidase, N-terminal, FAD-binding, type 2, subdomain 1, FAD-binding, type 2	nicotine biosynthesis	Yes
MSTRG.149165	Nitab4.5_0004816g0010	0.979	Nicotinate-nucleotide pyrophosphorylase, Quinolinate phosphoribosyl transferase, C-terminal, Quinolinate phosphoribosyl transferase, N-terminal, Aldolase-type TIM barrel, Nicotinate-nucleotide pyrophosphorylase/Putative pyrophosphorylase ModD	nicotine biosynthesis
MSTRG.149193	Nitab4.5_0000013g0390	0.867	Spermidine/spermine synthases family	nicotine biosynthesis
MSTRG.149681	Nitab4.5_0000814g0090	0.8579	S-adenosylmethionine synthetase superfamily, S-adenosylmethionine synthetase, N-terminal, S-adenosylmethionine synthetase, C-terminal, S-adenosylmethionine synthetase, S-adenosylmethionine synthetase, conserved site, S-adenosylmethionine synthetase, central domain	nicotine biosynthesis
MSTRG.150196	Nitab4.5_0000025g0290	0.8511	Copper amine oxidase, C-terminal, Copper amine oxidase, N2-terminal, Copper amine oxidase, N3-terminal, Copper amine oxidase, N-terminal, Copper amine oxidase, N2/N3-terminal, Copper amine oxidase	nicotine biosynthesis	Yes
MSTRG.150196	Nitab4.5_0001029g0080	0.8532	CO dehydrogenase flavoprotein-like, FAD-binding, subdomain 2, FAD linked oxidase, N-terminal, FAD-binding, type 2, subdomain 1, FAD-binding, type 2	nicotine biosynthesis	Yes
MSTRG.150291	Nitab4.5_0003646g0010	0.8519	Spermidine/spermine synthases family	nicotine biosynthesis
MSTRG.150917	Nitab4.5_0001931g0120	0.8734	S-adenosylmethionine synthetase, S-adenosylmethionine synthetase superfamily, S-adenosylmethionine synthetase, conserved site, S-adenosylmethionine synthetase, C-terminal, S-adenosylmethionine synthetase, central domain, S-adenosylmethionine synthetase, N-terminal	nicotine biosynthesis
MSTRG.150917	Nitab4.5_0006589g0020	0.8539	S-adenosylmethionine synthetase superfamily, S-adenosylmethionine synthetase, S-adenosylmethionine synthetase, central domain, S-adenosylmethionine synthetase, N-terminal, S-adenosylmethionine synthetase, conserved site, S-adenosylmethionine synthetase, C-terminal	nicotine biosynthesis
MSTRG.150922	Nitab4.5_0000063g0120	0.8909	S-adenosylmethionine synthetase, conserved site, S-adenosylmethionine synthetase superfamily, S-adenosylmethionine synthetase, N-terminal, S-adenosylmethionine synthetase, S-adenosylmethionine synthetase, C-terminal, S-adenosylmethionine synthetase, central domain	nicotine biosynthesis
MSTRG.150922	Nitab4.5_0000745g0170	0.9097	S-adenosylmethionine synthetase, central domain, S-adenosylmethionine synthetase, S-adenosylmethionine synthetase, C-terminal, S-adenosylmethionine synthetase, conserved site, S-adenosylmethionine synthetase superfamily, S-adenosylmethionine synthetase, N-terminal	nicotine biosynthesis
MSTRG.150922	Nitab4.5_0001029g0080	0.9212	CO dehydrogenase flavoprotein-like, FAD-binding, subdomain 2, FAD linked oxidase, N-terminal, FAD-binding, type 2, subdomain 1, FAD-binding, type 2	nicotine biosynthesis
MSTRG.150922	Nitab4.5_0001965g0070	0.8535	S-adenosylmethionine decarboxylase, S-adenosylmethionine decarboxylase, conserved site, S-adenosylmethionine decarboxylase subgroup, S-adenosyl-l-methionine decarboxylase leader peptide, S-adenosylmethionine decarboxylase, core	nicotine biosynthesis
MSTRG.151031	Nitab4.5_0000031g0370	0.8522	NAD(P)-binding domain, NmrA-like	nicotine biosynthesis	Yes
MSTRG.151031	Nitab4.5_0000316g0090	0.8938	CO dehydrogenase flavoprotein-like, FAD-binding, subdomain 2, FAD-binding, type 2, Berberine/berberine-like, FAD-binding, type 2, subdomain 1, FAD linked oxidase, N-terminal	nicotine biosynthesis	Yes
MSTRG.151031	Nitab4.5_0000745g0170	0.8934	S-adenosylmethionine synthetase, central domain, S-adenosylmethionine synthetase, S-adenosylmethionine synthetase, C-terminal, S-adenosylmethionine synthetase, conserved site, S-adenosylmethionine synthetase superfamily, S-adenosylmethionine synthetase, N-terminal	nicotine biosynthesis	Yes
MSTRG.151031	Nitab4.5_0000884g0010	0.8631	NmrA-like, NAD(P)-binding domain	nicotine biosynthesis	Yes
MSTRG.151031	Nitab4.5_0001029g0080	0.9051	CO dehydrogenase flavoprotein-like, FAD-binding, subdomain 2, FAD linked oxidase, N-terminal, FAD-binding, type 2, subdomain 1, FAD-binding, type 2	nicotine biosynthesis	Yes
MSTRG.151031	Nitab4.5_0006307g0010	0.8775	CO dehydrogenase flavoprotein-like, FAD-binding, subdomain 2, FAD-binding, type 2, FAD-binding, type 2, subdomain 1, FAD linked oxidase, N-terminal, Berberine/berberine-like	nicotine biosynthesis	Yes
MSTRG.151031	Nitab4.5_0015055g0010	0.8569	DNA-binding domain, AP2/ERF domain	nicotine biosynthesis	Yes
MSTRG.151147	Nitab4.5_0004816g0010	0.9516	Nicotinate-nucleotide pyrophosphorylase, Quinolinate phosphoribosyl transferase, C-terminal, Quinolinate phosphoribosyl transferase, N-terminal, Aldolase-type TIM barrel, Nicotinate-nucleotide pyrophosphorylase/Putative pyrophosphorylase ModD	nicotine biosynthesis
MSTRG.151553	Nitab4.5_0000031g0370	0.9172	NAD(P)-binding domain, NmrA-like	nicotine biosynthesis	Yes
MSTRG.151553	Nitab4.5_0000316g0090	0.9615	CO dehydrogenase flavoprotein-like, FAD-binding, subdomain 2, FAD-binding, type 2, Berberine/berberine-like, FAD-binding, type 2, subdomain 1, FAD linked oxidase, N-terminal	nicotine biosynthesis	Yes
MSTRG.151553	Nitab4.5_0000745g0170	0.8523	S-adenosylmethionine synthetase, central domain, S-adenosylmethionine synthetase, S-adenosylmethionine synthetase, C-terminal, S-adenosylmethionine synthetase, conserved site, S-adenosylmethionine synthetase superfamily, S-adenosylmethionine synthetase, N-terminal	nicotine biosynthesis	Yes
MSTRG.151553	Nitab4.5_0000884g0010	0.9174	NmrA-like, NAD(P)-binding domain	nicotine biosynthesis	Yes
MSTRG.151553	Nitab4.5_0001029g0080	0.868	CO dehydrogenase flavoprotein-like, FAD-binding, subdomain 2, FAD linked oxidase, N-terminal, FAD-binding, type 2, subdomain 1, FAD-binding, type 2	nicotine biosynthesis	Yes
MSTRG.151553	Nitab4.5_0002338g0020	0.9044	FAD binding domain, L-aspartate oxidase, Fumarate reductase/succinate dehydrogenase flavoprotein-like, C-terminal, Succinate dehydrogenase/fumarate reductase flavoprotein, catalytic domain, FAD-dependent pyridine nucleotide-disulphide oxidoreductase	nicotine biosynthesis	Yes
MSTRG.151553	Nitab4.5_0003090g0030	0.873	AP2/ERF domain, DNA-binding domain	nicotine biosynthesis	Yes
MSTRG.151553	Nitab4.5_0005830g0010	0.8602	Succinate dehydrogenase/fumarate reductase flavoprotein, catalytic domain, Fumarate reductase/succinate dehydrogenase flavoprotein-like, C-terminal, FAD binding domain, L-aspartate oxidase, FAD-dependent pyridine nucleotide-disulphide oxidoreductase	nicotine biosynthesis	Yes
MSTRG.151553	Nitab4.5_0006307g0010	0.9332	CO dehydrogenase flavoprotein-like, FAD-binding, subdomain 2, FAD-binding, type 2, FAD-binding, type 2, subdomain 1, FAD linked oxidase, N-terminal, Berberine/berberine-like	nicotine biosynthesis	Yes
MSTRG.151553	Nitab4.5_0011232g0010	0.9042	Spermidine/spermine synthases family, Putrescine N-methyltransferase	nicotine biosynthesis	Yes
MSTRG.151553	Nitab4.5_0015055g0010	0.9247	DNA-binding domain, AP2/ERF domain	nicotine biosynthesis	Yes
MSTRG.151662	Nitab4.5_0001029g0080	0.9381	CO dehydrogenase flavoprotein-like, FAD-binding, subdomain 2, FAD linked oxidase, N-terminal, FAD-binding, type 2, subdomain 1, FAD-binding, type 2	nicotine biosynthesis	Yes
MSTRG.151906	Nitab4.5_0000013g0390	0.8771	Spermidine/spermine synthases family	nicotine biosynthesis
MSTRG.152021	Nitab4.5_0000031g0370	0.9005	NAD(P)-binding domain, NmrA-like	nicotine biosynthesis	Yes
MSTRG.152021	Nitab4.5_0000316g0090	0.9624	CO dehydrogenase flavoprotein-like, FAD-binding, subdomain 2, FAD-binding, type 2, Berberine/berberine-like, FAD-binding, type 2, subdomain 1, FAD linked oxidase, N-terminal	nicotine biosynthesis	Yes
MSTRG.152021	Nitab4.5_0000745g0170	0.9403	S-adenosylmethionine synthetase, central domain, S-adenosylmethionine synthetase, S-adenosylmethionine synthetase, C-terminal, S-adenosylmethionine synthetase, conserved site, S-adenosylmethionine synthetase superfamily, S-adenosylmethionine synthetase, N-terminal	nicotine biosynthesis	Yes
MSTRG.152021	Nitab4.5_0000884g0010	0.903	NmrA-like, NAD(P)-binding domain	nicotine biosynthesis	Yes
MSTRG.152021	Nitab4.5_0001029g0080	0.9452	CO dehydrogenase flavoprotein-like, FAD-binding, subdomain 2, FAD linked oxidase, N-terminal, FAD-binding, type 2, subdomain 1, FAD-binding, type 2	nicotine biosynthesis	Yes
MSTRG.152021	Nitab4.5_0001965g0070	0.8811	S-adenosylmethionine decarboxylase, S-adenosylmethionine decarboxylase, conserved site, S-adenosylmethionine decarboxylase subgroup, S-adenosyl-l-methionine decarboxylase leader peptide, S-adenosylmethionine decarboxylase, core	nicotine biosynthesis	Yes
MSTRG.152021	Nitab4.5_0002338g0020	0.8839	FAD binding domain, L-aspartate oxidase, Fumarate reductase/succinate dehydrogenase flavoprotein-like, C-terminal, Succinate dehydrogenase/fumarate reductase flavoprotein, catalytic domain, FAD-dependent pyridine nucleotide-disulphide oxidoreductase	nicotine biosynthesis	Yes
MSTRG.152021	Nitab4.5_0006307g0010	0.9078	CO dehydrogenase flavoprotein-like, FAD-binding, subdomain 2, FAD-binding, type 2, FAD-binding, type 2, subdomain 1, FAD linked oxidase, N-terminal, Berberine/berberine-like	nicotine biosynthesis	Yes
MSTRG.152021	Nitab4.5_0011232g0010	0.8837	Spermidine/spermine synthases family, Putrescine N-methyltransferase	nicotine biosynthesis	Yes
MSTRG.152021	Nitab4.5_0015055g0010	0.906	DNA-binding domain, AP2/ERF domain	nicotine biosynthesis	Yes
MSTRG.152492	Nitab4.5_0000003g0720	0.8602	Copper amine oxidase, N2-terminal, Copper amine oxidase, Copper amine oxidase, C-terminal, Copper amine oxidase, N-terminal, Copper amine oxidase, N2/N3-terminal, Copper amine oxidase, N3-terminal	nicotine biosynthesis
MSTRG.152530	Nitab4.5_0000013g0390	0.9008	Spermidine/spermine synthases family	nicotine biosynthesis
MSTRG.152530	Nitab4.5_0003284g0010	0.8582	Spermidine/spermine synthases family, Putrescine N-methyltransferase	nicotine biosynthesis
MSTRG.152795	Nitab4.5_0004816g0010	0.9402	Nicotinate-nucleotide pyrophosphorylase, Quinolinate phosphoribosyl transferase, C-terminal, Quinolinate phosphoribosyl transferase, N-terminal, Aldolase-type TIM barrel, Nicotinate-nucleotide pyrophosphorylase/Putative pyrophosphorylase ModD	nicotine biosynthesis
MSTRG.152842	Nitab4.5_0003029g0030	0.8739	FAD-binding, type 2, subdomain 1, FAD linked oxidase, N-terminal, FAD-binding, type 2, Berberine/berberine-like	nicotine biosynthesis
MSTRG.152987	Nitab4.5_0004816g0010	0.9636	Nicotinate-nucleotide pyrophosphorylase, Quinolinate phosphoribosyl transferase, C-terminal, Quinolinate phosphoribosyl transferase, N-terminal, Aldolase-type TIM barrel, Nicotinate-nucleotide pyrophosphorylase/Putative pyrophosphorylase ModD	nicotine biosynthesis
MSTRG.153004	Nitab4.5_0001270g0090	0.8806	Alanine racemase/group IV decarboxylase, C-terminal, Ornithine decarboxylase, Orn/DAP/Arg decarboxylase 2, pyridoxal-phosphate binding site, Orn/DAP/Arg decarboxylase 2, N-terminal, Orn/DAP/Arg decarboxylase 2, C-terminal, Ornithine/DAP/Arg decarboxylase	nicotine biosynthesis
MSTRG.153045	Nitab4.5_0000063g0120	0.8739	S-adenosylmethionine synthetase, conserved site, S-adenosylmethionine synthetase superfamily, S-adenosylmethionine synthetase, N-terminal, S-adenosylmethionine synthetase, S-adenosylmethionine synthetase, C-terminal, S-adenosylmethionine synthetase, central domain	nicotine biosynthesis	Yes
MSTRG.153045	Nitab4.5_0000316g0090	0.8754	CO dehydrogenase flavoprotein-like, FAD-binding, subdomain 2, FAD-binding, type 2, Berberine/berberine-like, FAD-binding, type 2, subdomain 1, FAD linked oxidase, N-terminal	nicotine biosynthesis	Yes
MSTRG.153045	Nitab4.5_0000745g0170	0.9154	S-adenosylmethionine synthetase, central domain, S-adenosylmethionine synthetase, S-adenosylmethionine synthetase, C-terminal, S-adenosylmethionine synthetase, conserved site, S-adenosylmethionine synthetase superfamily, S-adenosylmethionine synthetase, N-terminal	nicotine biosynthesis	Yes
MSTRG.153045	Nitab4.5_0000884g0010	0.8536	NmrA-like, NAD(P)-binding domain	nicotine biosynthesis	Yes
MSTRG.153045	Nitab4.5_0001029g0080	0.9557	CO dehydrogenase flavoprotein-like, FAD-binding, subdomain 2, FAD linked oxidase, N-terminal, FAD-binding, type 2, subdomain 1, FAD-binding, type 2	nicotine biosynthesis	Yes
MSTRG.153045	Nitab4.5_0001965g0070	0.8571	S-adenosylmethionine decarboxylase, S-adenosylmethionine decarboxylase, conserved site, S-adenosylmethionine decarboxylase subgroup, S-adenosyl-l-methionine decarboxylase leader peptide, S-adenosylmethionine decarboxylase, core	nicotine biosynthesis	Yes
MSTRG.153272	Nitab4.5_0000013g0380	0.8587	Spermidine/spermine synthases family	nicotine biosynthesis	Yes
MSTRG.153272	Nitab4.5_0000025g0290	0.8525	Copper amine oxidase, C-terminal, Copper amine oxidase, N2-terminal, Copper amine oxidase, N3-terminal, Copper amine oxidase, N-terminal, Copper amine oxidase, N2/N3-terminal, Copper amine oxidase	nicotine biosynthesis	Yes
MSTRG.153272	Nitab4.5_0000031g0370	0.8717	NAD(P)-binding domain, NmrA-like	nicotine biosynthesis	Yes
MSTRG.153272	Nitab4.5_0000316g0090	0.8511	CO dehydrogenase flavoprotein-like, FAD-binding, subdomain 2, FAD-binding, type 2, Berberine/berberine-like, FAD-binding, type 2, subdomain 1, FAD linked oxidase, N-terminal	nicotine biosynthesis	Yes
MSTRG.153272	Nitab4.5_0000884g0010	0.8855	NmrA-like, NAD(P)-binding domain	nicotine biosynthesis	Yes
MSTRG.153272	Nitab4.5_0001029g0080	0.9141	CO dehydrogenase flavoprotein-like, FAD-binding, subdomain 2, FAD linked oxidase, N-terminal, FAD-binding, type 2, subdomain 1, FAD-binding, type 2	nicotine biosynthesis	Yes
MSTRG.153272	Nitab4.5_0002338g0020	0.8763	FAD binding domain, L-aspartate oxidase, Fumarate reductase/succinate dehydrogenase flavoprotein-like, C-terminal, Succinate dehydrogenase/fumarate reductase flavoprotein, catalytic domain, FAD-dependent pyridine nucleotide-disulphide oxidoreductase	nicotine biosynthesis	Yes
MSTRG.153272	Nitab4.5_0003090g0030	0.8777	AP2/ERF domain, DNA-binding domain	nicotine biosynthesis	Yes
MSTRG.153272	Nitab4.5_0006307g0010	0.8694	CO dehydrogenase flavoprotein-like, FAD-binding, subdomain 2, FAD-binding, type 2, FAD-binding, type 2, subdomain 1, FAD linked oxidase, N-terminal, Berberine/berberine-like	nicotine biosynthesis	Yes
MSTRG.153272	Nitab4.5_0011232g0010	0.8763	Spermidine/spermine synthases family, Putrescine N-methyltransferase	nicotine biosynthesis	Yes
MSTRG.153272	Nitab4.5_0015055g0010	0.8638	DNA-binding domain, AP2/ERF domain	nicotine biosynthesis	Yes
MSTRG.153300	Nitab4.5_0001029g0080	0.8607	CO dehydrogenase flavoprotein-like, FAD-binding, subdomain 2, FAD linked oxidase, N-terminal, FAD-binding, type 2, subdomain 1, FAD-binding, type 2	nicotine biosynthesis	Yes
MSTRG.153384	Nitab4.5_0000316g0090	0.866	CO dehydrogenase flavoprotein-like, FAD-binding, subdomain 2, FAD-binding, type 2, Berberine/berberine-like, FAD-binding, type 2, subdomain 1, FAD linked oxidase, N-terminal	nicotine biosynthesis	Yes
MSTRG.153384	Nitab4.5_0006307g0010	0.8547	CO dehydrogenase flavoprotein-like, FAD-binding, subdomain 2, FAD-binding, type 2, FAD-binding, type 2, subdomain 1, FAD linked oxidase, N-terminal, Berberine/berberine-like	nicotine biosynthesis	Yes
MSTRG.153455	Nitab4.5_0004816g0010	0.9689	Nicotinate-nucleotide pyrophosphorylase, Quinolinate phosphoribosyl transferase, C-terminal, Quinolinate phosphoribosyl transferase, N-terminal, Aldolase-type TIM barrel, Nicotinate-nucleotide pyrophosphorylase/Putative pyrophosphorylase ModD	nicotine biosynthesis
MSTRG.153456	Nitab4.5_0004816g0010	0.8894	Nicotinate-nucleotide pyrophosphorylase, Quinolinate phosphoribosyl transferase, C-terminal, Quinolinate phosphoribosyl transferase, N-terminal, Aldolase-type TIM barrel, Nicotinate-nucleotide pyrophosphorylase/Putative pyrophosphorylase ModD	nicotine biosynthesis
MSTRG.153987	Nitab4.5_0004816g0010	0.9551	Nicotinate-nucleotide pyrophosphorylase, Quinolinate phosphoribosyl transferase, C-terminal, Quinolinate phosphoribosyl transferase, N-terminal, Aldolase-type TIM barrel, Nicotinate-nucleotide pyrophosphorylase/Putative pyrophosphorylase ModD	nicotine biosynthesis
MSTRG.154019	Nitab4.5_0000013g0380	0.8781	Spermidine/spermine synthases family	nicotine biosynthesis	Yes
MSTRG.154019	Nitab4.5_0000013g0390	0.8817	Spermidine/spermine synthases family	nicotine biosynthesis
MSTRG.154019	Nitab4.5_0000025g0290	0.8736	Copper amine oxidase, C-terminal, Copper amine oxidase, N2-terminal, Copper amine oxidase, N3-terminal, Copper amine oxidase, N-terminal, Copper amine oxidase, N2/N3-terminal, Copper amine oxidase	nicotine biosynthesis	Yes
MSTRG.154019	Nitab4.5_0000031g0370	0.8563	NAD(P)-binding domain, NmrA-like	nicotine biosynthesis	Yes
MSTRG.154019	Nitab4.5_0000884g0010	0.8706	NmrA-like, NAD(P)-binding domain	nicotine biosynthesis	Yes
MSTRG.154019	Nitab4.5_0002338g0020	0.8669	FAD binding domain, L-aspartate oxidase, Fumarate reductase/succinate dehydrogenase flavoprotein-like, C-terminal, Succinate dehydrogenase/fumarate reductase flavoprotein, catalytic domain, FAD-dependent pyridine nucleotide-disulphide oxidoreductase	nicotine biosynthesis	Yes
MSTRG.154019	Nitab4.5_0003090g0030	0.8812	AP2/ERF domain, DNA-binding domain	nicotine biosynthesis	Yes
MSTRG.154019	Nitab4.5_0003284g0010	0.8741	Spermidine/spermine synthases family, Putrescine N-methyltransferase	nicotine biosynthesis	Yes
MSTRG.154019	Nitab4.5_0003284g0040	0.8584	Spermidine/spermine synthases family, Putrescine N-methyltransferase	nicotine biosynthesis	Yes
MSTRG.154019	Nitab4.5_0011232g0010	0.867	Spermidine/spermine synthases family, Putrescine N-methyltransferase	nicotine biosynthesis	Yes
MSTRG.154099	Nitab4.5_0002338g0040	0.8583	Fumarate reductase/succinate dehydrogenase flavoprotein-like, C-terminal, Succinate dehydrogenase/fumarate reductase flavoprotein, catalytic domain, FAD binding domain	nicotine biosynthesis
MSTRG.154193	Nitab4.5_0004816g0010	0.8895	Nicotinate-nucleotide pyrophosphorylase, Quinolinate phosphoribosyl transferase, C-terminal, Quinolinate phosphoribosyl transferase, N-terminal, Aldolase-type TIM barrel, Nicotinate-nucleotide pyrophosphorylase/Putative pyrophosphorylase ModD	nicotine biosynthesis
MSTRG.154216	Nitab4.5_0000003g0720	0.894	Copper amine oxidase, N2-terminal, Copper amine oxidase, Copper amine oxidase, C-terminal, Copper amine oxidase, N-terminal, Copper amine oxidase, N2/N3-terminal, Copper amine oxidase, N3-terminal	nicotine biosynthesis
MSTRG.154424	Nitab4.5_0000155g0200	0.8501	S-adenosylmethionine synthetase superfamily, S-adenosylmethionine synthetase, conserved site, S-adenosylmethionine synthetase, S-adenosylmethionine synthetase, N-terminal, S-adenosylmethionine synthetase, central domain, S-adenosylmethionine synthetase, C-terminal	nicotine biosynthesis
MSTRG.154915	Nitab4.5_0000003g0720	0.9223	Copper amine oxidase, N2-terminal, Copper amine oxidase, Copper amine oxidase, C-terminal, Copper amine oxidase, N-terminal, Copper amine oxidase, N2/N3-terminal, Copper amine oxidase, N3-terminal	nicotine biosynthesis
MSTRG.154955	Nitab4.5_0000316g0090	0.8536	CO dehydrogenase flavoprotein-like, FAD-binding, subdomain 2, FAD-binding, type 2, Berberine/berberine-like, FAD-binding, type 2, subdomain 1, FAD linked oxidase, N-terminal	nicotine biosynthesis	Yes
MSTRG.154955	Nitab4.5_0001029g0080	0.89	CO dehydrogenase flavoprotein-like, FAD-binding, subdomain 2, FAD linked oxidase, N-terminal, FAD-binding, type 2, subdomain 1, FAD-binding, type 2	nicotine biosynthesis	Yes
MSTRG.155252	Nitab4.5_0000003g0720	0.9021	Copper amine oxidase, N2-terminal, Copper amine oxidase, Copper amine oxidase, C-terminal, Copper amine oxidase, N-terminal, Copper amine oxidase, N2/N3-terminal, Copper amine oxidase, N3-terminal	nicotine biosynthesis
MSTRG.155600	Nitab4.5_0000742g0010	0.9065	Quinolinate phosphoribosyl transferase, C-terminal, Quinolinate phosphoribosyl transferase, N-terminal, Nicotinate-nucleotide pyrophosphorylase, Aldolase-type TIM barrel	nicotine biosynthesis
MSTRG.155656	Nitab4.5_0000003g0720	0.8865	Copper amine oxidase, N2-terminal, Copper amine oxidase, Copper amine oxidase, C-terminal, Copper amine oxidase, N-terminal, Copper amine oxidase, N2/N3-terminal, Copper amine oxidase, N3-terminal	nicotine biosynthesis
MSTRG.155833	Nitab4.5_0000013g0380	0.8518	Spermidine/spermine synthases family	nicotine biosynthesis	Yes
MSTRG.155833	Nitab4.5_0000031g0370	0.8536	NAD(P)-binding domain, NmrA-like	nicotine biosynthesis	Yes
MSTRG.155833	Nitab4.5_0000884g0010	0.873	NmrA-like, NAD(P)-binding domain	nicotine biosynthesis	Yes
MSTRG.155833	Nitab4.5_0001029g0080	0.9103	CO dehydrogenase flavoprotein-like, FAD-binding, subdomain 2, FAD linked oxidase, N-terminal, FAD-binding, type 2, subdomain 1, FAD-binding, type 2	nicotine biosynthesis	Yes
MSTRG.155833	Nitab4.5_0002338g0020	0.865	FAD binding domain, L-aspartate oxidase, Fumarate reductase/succinate dehydrogenase flavoprotein-like, C-terminal, Succinate dehydrogenase/fumarate reductase flavoprotein, catalytic domain, FAD-dependent pyridine nucleotide-disulphide oxidoreductase	nicotine biosynthesis	Yes
MSTRG.155833	Nitab4.5_0003090g0030	0.8736	AP2/ERF domain, DNA-binding domain	nicotine biosynthesis	Yes
MSTRG.155833	Nitab4.5_0006307g0010	0.8701	CO dehydrogenase flavoprotein-like, FAD-binding, subdomain 2, FAD-binding, type 2, FAD-binding, type 2, subdomain 1, FAD linked oxidase, N-terminal, Berberine/berberine-like	nicotine biosynthesis	Yes
MSTRG.155833	Nitab4.5_0011232g0010	0.8661	Spermidine/spermine synthases family, Putrescine N-methyltransferase	nicotine biosynthesis	Yes
MSTRG.155872	Nitab4.5_0000316g0090	0.8521	CO dehydrogenase flavoprotein-like, FAD-binding, subdomain 2, FAD-binding, type 2, Berberine/berberine-like, FAD-binding, type 2, subdomain 1, FAD linked oxidase, N-terminal	nicotine biosynthesis	Yes
MSTRG.155872	Nitab4.5_0001029g0080	0.867	CO dehydrogenase flavoprotein-like, FAD-binding, subdomain 2, FAD linked oxidase, N-terminal, FAD-binding, type 2, subdomain 1, FAD-binding, type 2	nicotine biosynthesis	Yes
MSTRG.155889	Nitab4.5_0000034g0230	0.8686	Spermidine/spermine synthases family	nicotine biosynthesis
MSTRG.155896	Nitab4.5_0000013g0380	0.8622	Spermidine/spermine synthases family	nicotine biosynthesis
MSTRG.155896	Nitab4.5_0000025g0290	0.8577	Copper amine oxidase, C-terminal, Copper amine oxidase, N2-terminal, Copper amine oxidase, N3-terminal, Copper amine oxidase, N-terminal, Copper amine oxidase, N2/N3-terminal, Copper amine oxidase	nicotine biosynthesis
MSTRG.155896	Nitab4.5_0000031g0370	0.9419	NAD(P)-binding domain, NmrA-like	nicotine biosynthesis
MSTRG.155896	Nitab4.5_0000316g0090	0.9753	CO dehydrogenase flavoprotein-like, FAD-binding, subdomain 2, FAD-binding, type 2, Berberine/berberine-like, FAD-binding, type 2, subdomain 1, FAD linked oxidase, N-terminal	nicotine biosynthesis
MSTRG.155896	Nitab4.5_0000884g0010	0.9367	NmrA-like, NAD(P)-binding domain	nicotine biosynthesis
MSTRG.155896	Nitab4.5_0001029g0080	0.8706	CO dehydrogenase flavoprotein-like, FAD-binding, subdomain 2, FAD linked oxidase, N-terminal, FAD-binding, type 2, subdomain 1, FAD-binding, type 2	nicotine biosynthesis
MSTRG.155896	Nitab4.5_0002338g0020	0.9251	FAD binding domain, L-aspartate oxidase, Fumarate reductase/succinate dehydrogenase flavoprotein-like, C-terminal, Succinate dehydrogenase/fumarate reductase flavoprotein, catalytic domain, FAD-dependent pyridine nucleotide-disulphide oxidoreductase	nicotine biosynthesis
MSTRG.155896	Nitab4.5_0002522g0070	0.869	Fe-S metabolism associated domain, SufE-like, Quinolinate synthetase A	nicotine biosynthesis
MSTRG.155896	Nitab4.5_0003090g0030	0.8885	AP2/ERF domain, DNA-binding domain	nicotine biosynthesis
MSTRG.155896	Nitab4.5_0005830g0010	0.89	Succinate dehydrogenase/fumarate reductase flavoprotein, catalytic domain, Fumarate reductase/succinate dehydrogenase flavoprotein-like, C-terminal, FAD binding domain, L-aspartate oxidase, FAD-dependent pyridine nucleotide-disulphide oxidoreductase	nicotine biosynthesis
MSTRG.155896	Nitab4.5_0006307g0010	0.9403	CO dehydrogenase flavoprotein-like, FAD-binding, subdomain 2, FAD-binding, type 2, FAD-binding, type 2, subdomain 1, FAD linked oxidase, N-terminal, Berberine/berberine-like	nicotine biosynthesis
MSTRG.155896	Nitab4.5_0011232g0010	0.9257	Spermidine/spermine synthases family, Putrescine N-methyltransferase	nicotine biosynthesis
MSTRG.155896	Nitab4.5_0015055g0010	0.9483	DNA-binding domain, AP2/ERF domain	nicotine biosynthesis
MSTRG.155977	Nitab4.5_0000063g0120	0.8742	S-adenosylmethionine synthetase, conserved site, S-adenosylmethionine synthetase superfamily, S-adenosylmethionine synthetase, N-terminal, S-adenosylmethionine synthetase, S-adenosylmethionine synthetase, C-terminal, S-adenosylmethionine synthetase, central domain	nicotine biosynthesis	Yes
MSTRG.155977	Nitab4.5_0000745g0170	0.8696	S-adenosylmethionine synthetase, central domain, S-adenosylmethionine synthetase, S-adenosylmethionine synthetase, C-terminal, S-adenosylmethionine synthetase, conserved site, S-adenosylmethionine synthetase superfamily, S-adenosylmethionine synthetase, N-terminal	nicotine biosynthesis	Yes
MSTRG.155977	Nitab4.5_0001029g0080	0.8555	CO dehydrogenase flavoprotein-like, FAD-binding, subdomain 2, FAD linked oxidase, N-terminal, FAD-binding, type 2, subdomain 1, FAD-binding, type 2	nicotine biosynthesis	Yes
MSTRG.156088	Nitab4.5_0001029g0080	0.8655	CO dehydrogenase flavoprotein-like, FAD-binding, subdomain 2, FAD linked oxidase, N-terminal, FAD-binding, type 2, subdomain 1, FAD-binding, type 2	nicotine biosynthesis	Yes
MSTRG.156160	Nitab4.5_0000013g0380	0.8849	Spermidine/spermine synthases family	nicotine biosynthesis
MSTRG.156160	Nitab4.5_0000013g0390	0.9478	Spermidine/spermine synthases family	nicotine biosynthesis
MSTRG.156160	Nitab4.5_0000025g0290	0.882	Copper amine oxidase, C-terminal, Copper amine oxidase, N2-terminal, Copper amine oxidase, N3-terminal, Copper amine oxidase, N-terminal, Copper amine oxidase, N2/N3-terminal, Copper amine oxidase	nicotine biosynthesis
MSTRG.156160	Nitab4.5_0003090g0030	0.8501	AP2/ERF domain, DNA-binding domain	nicotine biosynthesis
MSTRG.156160	Nitab4.5_0003284g0010	0.9271	Spermidine/spermine synthases family, Putrescine N-methyltransferase	nicotine biosynthesis
MSTRG.156160	Nitab4.5_0003284g0040	0.8986	Spermidine/spermine synthases family, Putrescine N-methyltransferase	nicotine biosynthesis
MSTRG.156168	Nitab4.5_0000013g0380	0.861	Spermidine/spermine synthases family	nicotine biosynthesis
MSTRG.156168	Nitab4.5_0000025g0290	0.8595	Copper amine oxidase, C-terminal, Copper amine oxidase, N2-terminal, Copper amine oxidase, N3-terminal, Copper amine oxidase, N-terminal, Copper amine oxidase, N2/N3-terminal, Copper amine oxidase	nicotine biosynthesis
MSTRG.156168	Nitab4.5_0002338g0020	0.8515	FAD binding domain, L-aspartate oxidase, Fumarate reductase/succinate dehydrogenase flavoprotein-like, C-terminal, Succinate dehydrogenase/fumarate reductase flavoprotein, catalytic domain, FAD-dependent pyridine nucleotide-disulphide oxidoreductase	nicotine biosynthesis
MSTRG.156168	Nitab4.5_0003090g0030	0.8536	AP2/ERF domain, DNA-binding domain	nicotine biosynthesis
MSTRG.156168	Nitab4.5_0003284g0010	0.8522	Spermidine/spermine synthases family, Putrescine N-methyltransferase	nicotine biosynthesis
MSTRG.156168	Nitab4.5_0006307g0010	0.853	CO dehydrogenase flavoprotein-like, FAD-binding, subdomain 2, FAD-binding, type 2, FAD-binding, type 2, subdomain 1, FAD linked oxidase, N-terminal, Berberine/berberine-like	nicotine biosynthesis
MSTRG.156270	Nitab4.5_0000013g0380	0.8845	Spermidine/spermine synthases family	nicotine biosynthesis	Yes
MSTRG.156270	Nitab4.5_0000013g0390	0.8974	Spermidine/spermine synthases family	nicotine biosynthesis
MSTRG.156270	Nitab4.5_0000025g0290	0.8738	Copper amine oxidase, C-terminal, Copper amine oxidase, N2-terminal, Copper amine oxidase, N3-terminal, Copper amine oxidase, N-terminal, Copper amine oxidase, N2/N3-terminal, Copper amine oxidase	nicotine biosynthesis	Yes
MSTRG.156270	Nitab4.5_0000031g0370	0.8501	NAD(P)-binding domain, NmrA-like	nicotine biosynthesis	Yes
MSTRG.156270	Nitab4.5_0000884g0010	0.8628	NmrA-like, NAD(P)-binding domain	nicotine biosynthesis	Yes
MSTRG.156270	Nitab4.5_0002338g0020	0.8671	FAD binding domain, L-aspartate oxidase, Fumarate reductase/succinate dehydrogenase flavoprotein-like, C-terminal, Succinate dehydrogenase/fumarate reductase flavoprotein, catalytic domain, FAD-dependent pyridine nucleotide-disulphide oxidoreductase	nicotine biosynthesis	Yes
MSTRG.156270	Nitab4.5_0003090g0030	0.8869	AP2/ERF domain, DNA-binding domain	nicotine biosynthesis	Yes
MSTRG.156270	Nitab4.5_0003284g0010	0.887	Spermidine/spermine synthases family, Putrescine N-methyltransferase	nicotine biosynthesis	Yes
MSTRG.156270	Nitab4.5_0003284g0040	0.8681	Spermidine/spermine synthases family, Putrescine N-methyltransferase	nicotine biosynthesis	Yes
MSTRG.156270	Nitab4.5_0011232g0010	0.8629	Spermidine/spermine synthases family, Putrescine N-methyltransferase	nicotine biosynthesis	Yes
MSTRG.156427	Nitab4.5_0000013g0380	0.9445	Spermidine/spermine synthases family	nicotine biosynthesis
MSTRG.156427	Nitab4.5_0000013g0390	0.8644	Spermidine/spermine synthases family	nicotine biosynthesis
MSTRG.156427	Nitab4.5_0000025g0290	0.948	Copper amine oxidase, C-terminal, Copper amine oxidase, N2-terminal, Copper amine oxidase, N3-terminal, Copper amine oxidase, N-terminal, Copper amine oxidase, N2/N3-terminal, Copper amine oxidase	nicotine biosynthesis
MSTRG.156427	Nitab4.5_0000031g0370	0.9787	NAD(P)-binding domain, NmrA-like	nicotine biosynthesis
MSTRG.156427	Nitab4.5_0000316g0090	0.9581	CO dehydrogenase flavoprotein-like, FAD-binding, subdomain 2, FAD-binding, type 2, Berberine/berberine-like, FAD-binding, type 2, subdomain 1, FAD linked oxidase, N-terminal	nicotine biosynthesis
MSTRG.156427	Nitab4.5_0000884g0010	0.9774	NmrA-like, NAD(P)-binding domain	nicotine biosynthesis
MSTRG.156427	Nitab4.5_0001029g0080	0.8645	CO dehydrogenase flavoprotein-like, FAD-binding, subdomain 2, FAD linked oxidase, N-terminal, FAD-binding, type 2, subdomain 1, FAD-binding, type 2	nicotine biosynthesis
MSTRG.156427	Nitab4.5_0002338g0020	0.9737	FAD binding domain, L-aspartate oxidase, Fumarate reductase/succinate dehydrogenase flavoprotein-like, C-terminal, Succinate dehydrogenase/fumarate reductase flavoprotein, catalytic domain, FAD-dependent pyridine nucleotide-disulphide oxidoreductase	nicotine biosynthesis
MSTRG.156427	Nitab4.5_0002522g0070	0.8802	Fe-S metabolism associated domain, SufE-like, Quinolinate synthetase A	nicotine biosynthesis
MSTRG.156427	Nitab4.5_0003090g0030	0.9579	AP2/ERF domain, DNA-binding domain	nicotine biosynthesis
MSTRG.156427	Nitab4.5_0003284g0010	0.9116	Spermidine/spermine synthases family, Putrescine N-methyltransferase	nicotine biosynthesis
MSTRG.156427	Nitab4.5_0003284g0040	0.936	Spermidine/spermine synthases family, Putrescine N-methyltransferase	nicotine biosynthesis
MSTRG.156427	Nitab4.5_0005830g0010	0.9431	Succinate dehydrogenase/fumarate reductase flavoprotein, catalytic domain, Fumarate reductase/succinate dehydrogenase flavoprotein-like, C-terminal, FAD binding domain, L-aspartate oxidase, FAD-dependent pyridine nucleotide-disulphide oxidoreductase	nicotine biosynthesis
MSTRG.156427	Nitab4.5_0006307g0010	0.9663	CO dehydrogenase flavoprotein-like, FAD-binding, subdomain 2, FAD-binding, type 2, FAD-binding, type 2, subdomain 1, FAD linked oxidase, N-terminal, Berberine/berberine-like	nicotine biosynthesis
MSTRG.156427	Nitab4.5_0011232g0010	0.9751	Spermidine/spermine synthases family, Putrescine N-methyltransferase	nicotine biosynthesis
MSTRG.156427	Nitab4.5_0015055g0010	0.9775	DNA-binding domain, AP2/ERF domain	nicotine biosynthesis
MSTRG.156470	Nitab4.5_0000003g0720	0.8884	Copper amine oxidase, N2-terminal, Copper amine oxidase, Copper amine oxidase, C-terminal, Copper amine oxidase, N-terminal, Copper amine oxidase, N2/N3-terminal, Copper amine oxidase, N3-terminal	nicotine biosynthesis
MSTRG.156487	Nitab4.5_0000063g0120	0.886	S-adenosylmethionine synthetase, conserved site, S-adenosylmethionine synthetase superfamily, S-adenosylmethionine synthetase, N-terminal, S-adenosylmethionine synthetase, S-adenosylmethionine synthetase, C-terminal, S-adenosylmethionine synthetase, central domain	nicotine biosynthesis	Yes
MSTRG.156487	Nitab4.5_0001029g0080	0.9278	CO dehydrogenase flavoprotein-like, FAD-binding, subdomain 2, FAD linked oxidase, N-terminal, FAD-binding, type 2, subdomain 1, FAD-binding, type 2	nicotine biosynthesis	Yes
MSTRG.156612	Nitab4.5_0003524g0020	0.8791	S-adenosylmethionine synthetase superfamily, S-adenosylmethionine synthetase, S-adenosylmethionine synthetase, N-terminal, S-adenosylmethionine synthetase, conserved site, S-adenosylmethionine synthetase, central domain, S-adenosylmethionine synthetase, C-terminal	nicotine biosynthesis
MSTRG.156639	Nitab4.5_0000034g0230	0.8521	Spermidine/spermine synthases family	nicotine biosynthesis
MSTRG.156639	Nitab4.5_0000113g0030	0.893	Spermidine/spermine synthases family	nicotine biosynthesis
MSTRG.156639	Nitab4.5_0003280g0010	0.9284	Alanine racemase/group IV decarboxylase, C-terminal, Orn/DAP/Arg decarboxylase 2, N-terminal, Ornithine/DAP/Arg decarboxylase, Orn/DAP/Arg decarboxylase 2, conserved site, Orn/DAP/Arg decarboxylase 2, pyridoxal-phosphate binding site, Orn/DAP/Arg decarboxylase 2, C-terminal, Ornithine decarboxylase	nicotine biosynthesis
MSTRG.156639	Nitab4.5_0010954g0020	0.8753	Spermidine/spermine synthases family	nicotine biosynthesis
MSTRG.156647	Nitab4.5_0004816g0010	0.9032	Nicotinate-nucleotide pyrophosphorylase, Quinolinate phosphoribosyl transferase, C-terminal, Quinolinate phosphoribosyl transferase, N-terminal, Aldolase-type TIM barrel, Nicotinate-nucleotide pyrophosphorylase/Putative pyrophosphorylase ModD	nicotine biosynthesis
MSTRG.156658	Nitab4.5_0001029g0080	0.8634	CO dehydrogenase flavoprotein-like, FAD-binding, subdomain 2, FAD linked oxidase, N-terminal, FAD-binding, type 2, subdomain 1, FAD-binding, type 2	nicotine biosynthesis	Yes
MSTRG.157240	Nitab4.5_0000063g0120	0.87	S-adenosylmethionine synthetase, conserved site, S-adenosylmethionine synthetase superfamily, S-adenosylmethionine synthetase, N-terminal, S-adenosylmethionine synthetase, S-adenosylmethionine synthetase, C-terminal, S-adenosylmethionine synthetase, central domain	nicotine biosynthesis
MSTRG.157348	Nitab4.5_0000316g0090	0.8646	CO dehydrogenase flavoprotein-like, FAD-binding, subdomain 2, FAD-binding, type 2, Berberine/berberine-like, FAD-binding, type 2, subdomain 1, FAD linked oxidase, N-terminal	nicotine biosynthesis
MSTRG.157348	Nitab4.5_0000745g0170	0.934	S-adenosylmethionine synthetase, central domain, S-adenosylmethionine synthetase, S-adenosylmethionine synthetase, C-terminal, S-adenosylmethionine synthetase, conserved site, S-adenosylmethionine synthetase superfamily, S-adenosylmethionine synthetase, N-terminal	nicotine biosynthesis
MSTRG.157348	Nitab4.5_0001029g0080	0.9103	CO dehydrogenase flavoprotein-like, FAD-binding, subdomain 2, FAD linked oxidase, N-terminal, FAD-binding, type 2, subdomain 1, FAD-binding, type 2	nicotine biosynthesis
MSTRG.157348	Nitab4.5_0001965g0070	0.8615	S-adenosylmethionine decarboxylase, S-adenosylmethionine decarboxylase, conserved site, S-adenosylmethionine decarboxylase subgroup, S-adenosyl-l-methionine decarboxylase leader peptide, S-adenosylmethionine decarboxylase, core	nicotine biosynthesis
MSTRG.157530	Nitab4.5_0004816g0010	0.8608	Nicotinate-nucleotide pyrophosphorylase, Quinolinate phosphoribosyl transferase, C-terminal, Quinolinate phosphoribosyl transferase, N-terminal, Aldolase-type TIM barrel, Nicotinate-nucleotide pyrophosphorylase/Putative pyrophosphorylase ModD	nicotine biosynthesis
MSTRG.157560	Nitab4.5_0000742g0010	0.8653	Quinolinate phosphoribosyl transferase, C-terminal, Quinolinate phosphoribosyl transferase, N-terminal, Nicotinate-nucleotide pyrophosphorylase, Aldolase-type TIM barrel	nicotine biosynthesis
MSTRG.157560	Nitab4.5_0004816g0010	0.8529	Nicotinate-nucleotide pyrophosphorylase, Quinolinate phosphoribosyl transferase, C-terminal, Quinolinate phosphoribosyl transferase, N-terminal, Aldolase-type TIM barrel, Nicotinate-nucleotide pyrophosphorylase/Putative pyrophosphorylase ModD	nicotine biosynthesis
MSTRG.157561	Nitab4.5_0004816g0010	0.9562	Nicotinate-nucleotide pyrophosphorylase, Quinolinate phosphoribosyl transferase, C-terminal, Quinolinate phosphoribosyl transferase, N-terminal, Aldolase-type TIM barrel, Nicotinate-nucleotide pyrophosphorylase/Putative pyrophosphorylase ModD	nicotine biosynthesis
MSTRG.157779	Nitab4.5_0000745g0170	0.8638	S-adenosylmethionine synthetase, central domain, S-adenosylmethionine synthetase, S-adenosylmethionine synthetase, C-terminal, S-adenosylmethionine synthetase, conserved site, S-adenosylmethionine synthetase superfamily, S-adenosylmethionine synthetase, N-terminal	nicotine biosynthesis	Yes
MSTRG.157779	Nitab4.5_0001029g0080	0.8507	CO dehydrogenase flavoprotein-like, FAD-binding, subdomain 2, FAD linked oxidase, N-terminal, FAD-binding, type 2, subdomain 1, FAD-binding, type 2	nicotine biosynthesis	Yes
MSTRG.15795	Nitab4.5_0000013g0380	0.8984	Spermidine/spermine synthases family	nicotine biosynthesis
MSTRG.15795	Nitab4.5_0000013g0390	0.9416	Spermidine/spermine synthases family	nicotine biosynthesis
MSTRG.15795	Nitab4.5_0000025g0290	0.8876	Copper amine oxidase, C-terminal, Copper amine oxidase, N2-terminal, Copper amine oxidase, N3-terminal, Copper amine oxidase, N-terminal, Copper amine oxidase, N2/N3-terminal, Copper amine oxidase	nicotine biosynthesis
MSTRG.15795	Nitab4.5_0003090g0030	0.8709	AP2/ERF domain, DNA-binding domain	nicotine biosynthesis
MSTRG.15795	Nitab4.5_0003284g0010	0.9284	Spermidine/spermine synthases family, Putrescine N-methyltransferase	nicotine biosynthesis
MSTRG.15795	Nitab4.5_0003284g0040	0.9044	Spermidine/spermine synthases family, Putrescine N-methyltransferase	nicotine biosynthesis
MSTRG.15795	Nitab4.5_0005830g0010	0.8557	Succinate dehydrogenase/fumarate reductase flavoprotein, catalytic domain, Fumarate reductase/succinate dehydrogenase flavoprotein-like, C-terminal, FAD binding domain, L-aspartate oxidase, FAD-dependent pyridine nucleotide-disulphide oxidoreductase	nicotine biosynthesis
MSTRG.15796	Nitab4.5_0000155g0200	0.8551	S-adenosylmethionine synthetase superfamily, S-adenosylmethionine synthetase, conserved site, S-adenosylmethionine synthetase, S-adenosylmethionine synthetase, N-terminal, S-adenosylmethionine synthetase, central domain, S-adenosylmethionine synthetase, C-terminal	nicotine biosynthesis
MSTRG.158071	Nitab4.5_0000063g0120	0.9206	S-adenosylmethionine synthetase, conserved site, S-adenosylmethionine synthetase superfamily, S-adenosylmethionine synthetase, N-terminal, S-adenosylmethionine synthetase, S-adenosylmethionine synthetase, C-terminal, S-adenosylmethionine synthetase, central domain	nicotine biosynthesis	Yes
MSTRG.158071	Nitab4.5_0000745g0170	0.9531	S-adenosylmethionine synthetase, central domain, S-adenosylmethionine synthetase, S-adenosylmethionine synthetase, C-terminal, S-adenosylmethionine synthetase, conserved site, S-adenosylmethionine synthetase superfamily, S-adenosylmethionine synthetase, N-terminal	nicotine biosynthesis	Yes
MSTRG.158071	Nitab4.5_0001029g0080	0.9404	CO dehydrogenase flavoprotein-like, FAD-binding, subdomain 2, FAD linked oxidase, N-terminal, FAD-binding, type 2, subdomain 1, FAD-binding, type 2	nicotine biosynthesis	Yes
MSTRG.158071	Nitab4.5_0001965g0070	0.8728	S-adenosylmethionine decarboxylase, S-adenosylmethionine decarboxylase, conserved site, S-adenosylmethionine decarboxylase subgroup, S-adenosyl-l-methionine decarboxylase leader peptide, S-adenosylmethionine decarboxylase, core	nicotine biosynthesis	Yes
MSTRG.158071	Nitab4.5_0004665g0010	0.8581	S-adenosylmethionine synthetase, conserved site, S-adenosylmethionine synthetase, S-adenosylmethionine synthetase superfamily, S-adenosylmethionine synthetase, C-terminal, S-adenosylmethionine synthetase, central domain, S-adenosylmethionine synthetase, N-terminal	nicotine biosynthesis
MSTRG.158465	Nitab4.5_0000063g0120	0.923	S-adenosylmethionine synthetase, conserved site, S-adenosylmethionine synthetase superfamily, S-adenosylmethionine synthetase, N-terminal, S-adenosylmethionine synthetase, S-adenosylmethionine synthetase, C-terminal, S-adenosylmethionine synthetase, central domain	nicotine biosynthesis	Yes
MSTRG.158465	Nitab4.5_0000063g0170	0.8909	similar to S-adenosylmethionine synthase 2	nicotine biosynthesis	Yes
MSTRG.158465	Nitab4.5_0000745g0170	0.8764	S-adenosylmethionine synthetase, central domain, S-adenosylmethionine synthetase, S-adenosylmethionine synthetase, C-terminal, S-adenosylmethionine synthetase, conserved site, S-adenosylmethionine synthetase superfamily, S-adenosylmethionine synthetase, N-terminal	nicotine biosynthesis	Yes
MSTRG.158465	Nitab4.5_0001029g0080	0.8988	CO dehydrogenase flavoprotein-like, FAD-binding, subdomain 2, FAD linked oxidase, N-terminal, FAD-binding, type 2, subdomain 1, FAD-binding, type 2	nicotine biosynthesis	Yes
MSTRG.158472	Nitab4.5_0000063g0170	0.8558	similar to S-adenosylmethionine synthase 2	nicotine biosynthesis
MSTRG.158498	Nitab4.5_0000316g0090	0.8923	CO dehydrogenase flavoprotein-like, FAD-binding, subdomain 2, FAD-binding, type 2, Berberine/berberine-like, FAD-binding, type 2, subdomain 1, FAD linked oxidase, N-terminal	nicotine biosynthesis
MSTRG.158498	Nitab4.5_0000745g0170	0.8919	S-adenosylmethionine synthetase, central domain, S-adenosylmethionine synthetase, S-adenosylmethionine synthetase, C-terminal, S-adenosylmethionine synthetase, conserved site, S-adenosylmethionine synthetase superfamily, S-adenosylmethionine synthetase, N-terminal	nicotine biosynthesis
MSTRG.158498	Nitab4.5_0001029g0080	0.9412	CO dehydrogenase flavoprotein-like, FAD-binding, subdomain 2, FAD linked oxidase, N-terminal, FAD-binding, type 2, subdomain 1, FAD-binding, type 2	nicotine biosynthesis
MSTRG.159254	Nitab4.5_0000745g0170	0.8937	S-adenosylmethionine synthetase, central domain, S-adenosylmethionine synthetase, S-adenosylmethionine synthetase, C-terminal, S-adenosylmethionine synthetase, conserved site, S-adenosylmethionine synthetase superfamily, S-adenosylmethionine synthetase, N-terminal	nicotine biosynthesis	Yes
MSTRG.159254	Nitab4.5_0001965g0070	0.8577	S-adenosylmethionine decarboxylase, S-adenosylmethionine decarboxylase, conserved site, S-adenosylmethionine decarboxylase subgroup, S-adenosyl-l-methionine decarboxylase leader peptide, S-adenosylmethionine decarboxylase, core	nicotine biosynthesis	Yes
MSTRG.159463	Nitab4.5_0004816g0010	0.9833	Nicotinate-nucleotide pyrophosphorylase, Quinolinate phosphoribosyl transferase, C-terminal, Quinolinate phosphoribosyl transferase, N-terminal, Aldolase-type TIM barrel, Nicotinate-nucleotide pyrophosphorylase/Putative pyrophosphorylase ModD	nicotine biosynthesis
MSTRG.159464	Nitab4.5_0004816g0010	0.984	Nicotinate-nucleotide pyrophosphorylase, Quinolinate phosphoribosyl transferase, C-terminal, Quinolinate phosphoribosyl transferase, N-terminal, Aldolase-type TIM barrel, Nicotinate-nucleotide pyrophosphorylase/Putative pyrophosphorylase ModD	nicotine biosynthesis
MSTRG.159570	Nitab4.5_0000003g0720	0.8642	Copper amine oxidase, N2-terminal, Copper amine oxidase, Copper amine oxidase, C-terminal, Copper amine oxidase, N-terminal, Copper amine oxidase, N2/N3-terminal, Copper amine oxidase, N3-terminal	nicotine biosynthesis
MSTRG.160351	Nitab4.5_0000031g0370	0.8633	NAD(P)-binding domain, NmrA-like	nicotine biosynthesis	Yes
MSTRG.160351	Nitab4.5_0000316g0090	0.9475	CO dehydrogenase flavoprotein-like, FAD-binding, subdomain 2, FAD-binding, type 2, Berberine/berberine-like, FAD-binding, type 2, subdomain 1, FAD linked oxidase, N-terminal	nicotine biosynthesis	Yes
MSTRG.160351	Nitab4.5_0000745g0170	0.9545	S-adenosylmethionine synthetase, central domain, S-adenosylmethionine synthetase, S-adenosylmethionine synthetase, C-terminal, S-adenosylmethionine synthetase, conserved site, S-adenosylmethionine synthetase superfamily, S-adenosylmethionine synthetase, N-terminal	nicotine biosynthesis	Yes
MSTRG.160351	Nitab4.5_0000884g0010	0.8642	NmrA-like, NAD(P)-binding domain	nicotine biosynthesis	Yes
MSTRG.160351	Nitab4.5_0001029g0080	0.9349	CO dehydrogenase flavoprotein-like, FAD-binding, subdomain 2, FAD linked oxidase, N-terminal, FAD-binding, type 2, subdomain 1, FAD-binding, type 2	nicotine biosynthesis	Yes
MSTRG.160351	Nitab4.5_0001965g0070	0.8826	S-adenosylmethionine decarboxylase, S-adenosylmethionine decarboxylase, conserved site, S-adenosylmethionine decarboxylase subgroup, S-adenosyl-l-methionine decarboxylase leader peptide, S-adenosylmethionine decarboxylase, core	nicotine biosynthesis	Yes
MSTRG.160351	Nitab4.5_0006307g0010	0.8721	CO dehydrogenase flavoprotein-like, FAD-binding, subdomain 2, FAD-binding, type 2, FAD-binding, type 2, subdomain 1, FAD linked oxidase, N-terminal, Berberine/berberine-like	nicotine biosynthesis	Yes
MSTRG.160351	Nitab4.5_0015055g0010	0.8717	DNA-binding domain, AP2/ERF domain	nicotine biosynthesis	Yes
MSTRG.160826	Nitab4.5_0001965g0070	0.8545	S-adenosylmethionine decarboxylase, S-adenosylmethionine decarboxylase, conserved site, S-adenosylmethionine decarboxylase subgroup, S-adenosyl-l-methionine decarboxylase leader peptide, S-adenosylmethionine decarboxylase, core	nicotine biosynthesis	Yes
MSTRG.160902	Nitab4.5_0004816g0010	0.9705	Nicotinate-nucleotide pyrophosphorylase, Quinolinate phosphoribosyl transferase, C-terminal, Quinolinate phosphoribosyl transferase, N-terminal, Aldolase-type TIM barrel, Nicotinate-nucleotide pyrophosphorylase/Putative pyrophosphorylase ModD	nicotine biosynthesis
MSTRG.161132	Nitab4.5_0000063g0120	0.8605	S-adenosylmethionine synthetase, conserved site, S-adenosylmethionine synthetase superfamily, S-adenosylmethionine synthetase, N-terminal, S-adenosylmethionine synthetase, S-adenosylmethionine synthetase, C-terminal, S-adenosylmethionine synthetase, central domain	nicotine biosynthesis	Yes
MSTRG.161132	Nitab4.5_0000316g0090	0.8537	CO dehydrogenase flavoprotein-like, FAD-binding, subdomain 2, FAD-binding, type 2, Berberine/berberine-like, FAD-binding, type 2, subdomain 1, FAD linked oxidase, N-terminal	nicotine biosynthesis	Yes
MSTRG.161132	Nitab4.5_0000745g0170	0.9028	S-adenosylmethionine synthetase, central domain, S-adenosylmethionine synthetase, S-adenosylmethionine synthetase, C-terminal, S-adenosylmethionine synthetase, conserved site, S-adenosylmethionine synthetase superfamily, S-adenosylmethionine synthetase, N-terminal	nicotine biosynthesis	Yes
MSTRG.161132	Nitab4.5_0000884g0010	0.8523	NmrA-like, NAD(P)-binding domain	nicotine biosynthesis	Yes
MSTRG.161132	Nitab4.5_0001029g0080	0.9176	CO dehydrogenase flavoprotein-like, FAD-binding, subdomain 2, FAD linked oxidase, N-terminal, FAD-binding, type 2, subdomain 1, FAD-binding, type 2	nicotine biosynthesis	Yes
MSTRG.161132	Nitab4.5_0006307g0010	0.8512	CO dehydrogenase flavoprotein-like, FAD-binding, subdomain 2, FAD-binding, type 2, FAD-binding, type 2, subdomain 1, FAD linked oxidase, N-terminal, Berberine/berberine-like	nicotine biosynthesis	Yes
MSTRG.161242	Nitab4.5_0000031g0370	0.8642	NAD(P)-binding domain, NmrA-like	nicotine biosynthesis	Yes
MSTRG.161242	Nitab4.5_0000316g0090	0.9289	CO dehydrogenase flavoprotein-like, FAD-binding, subdomain 2, FAD-binding, type 2, Berberine/berberine-like, FAD-binding, type 2, subdomain 1, FAD linked oxidase, N-terminal	nicotine biosynthesis	Yes
MSTRG.161242	Nitab4.5_0000745g0170	0.8791	S-adenosylmethionine synthetase, central domain, S-adenosylmethionine synthetase, S-adenosylmethionine synthetase, C-terminal, S-adenosylmethionine synthetase, conserved site, S-adenosylmethionine synthetase superfamily, S-adenosylmethionine synthetase, N-terminal	nicotine biosynthesis	Yes
MSTRG.161242	Nitab4.5_0000884g0010	0.8702	NmrA-like, NAD(P)-binding domain	nicotine biosynthesis	Yes
MSTRG.161242	Nitab4.5_0001029g0080	0.9312	CO dehydrogenase flavoprotein-like, FAD-binding, subdomain 2, FAD linked oxidase, N-terminal, FAD-binding, type 2, subdomain 1, FAD-binding, type 2	nicotine biosynthesis	Yes
MSTRG.161242	Nitab4.5_0002338g0020	0.8545	FAD binding domain, L-aspartate oxidase, Fumarate reductase/succinate dehydrogenase flavoprotein-like, C-terminal, Succinate dehydrogenase/fumarate reductase flavoprotein, catalytic domain, FAD-dependent pyridine nucleotide-disulphide oxidoreductase	nicotine biosynthesis	Yes
MSTRG.161242	Nitab4.5_0006307g0010	0.8931	CO dehydrogenase flavoprotein-like, FAD-binding, subdomain 2, FAD-binding, type 2, FAD-binding, type 2, subdomain 1, FAD linked oxidase, N-terminal, Berberine/berberine-like	nicotine biosynthesis	Yes
MSTRG.161242	Nitab4.5_0011232g0010	0.8512	Spermidine/spermine synthases family, Putrescine N-methyltransferase	nicotine biosynthesis	Yes
MSTRG.161242	Nitab4.5_0015055g0010	0.868	DNA-binding domain, AP2/ERF domain	nicotine biosynthesis	Yes
MSTRG.161449	Nitab4.5_0000745g0170	0.8677	S-adenosylmethionine synthetase, central domain, S-adenosylmethionine synthetase, S-adenosylmethionine synthetase, C-terminal, S-adenosylmethionine synthetase, conserved site, S-adenosylmethionine synthetase superfamily, S-adenosylmethionine synthetase, N-terminal	nicotine biosynthesis	Yes
MSTRG.161449	Nitab4.5_0001029g0080	0.881	CO dehydrogenase flavoprotein-like, FAD-binding, subdomain 2, FAD linked oxidase, N-terminal, FAD-binding, type 2, subdomain 1, FAD-binding, type 2	nicotine biosynthesis	Yes
MSTRG.161639	Nitab4.5_0004816g0010	0.9793	Nicotinate-nucleotide pyrophosphorylase, Quinolinate phosphoribosyl transferase, C-terminal, Quinolinate phosphoribosyl transferase, N-terminal, Aldolase-type TIM barrel, Nicotinate-nucleotide pyrophosphorylase/Putative pyrophosphorylase ModD	nicotine biosynthesis
MSTRG.162178	Nitab4.5_0000031g0370	0.9172	NAD(P)-binding domain, NmrA-like	nicotine biosynthesis
MSTRG.162178	Nitab4.5_0000316g0090	0.9661	CO dehydrogenase flavoprotein-like, FAD-binding, subdomain 2, FAD-binding, type 2, Berberine/berberine-like, FAD-binding, type 2, subdomain 1, FAD linked oxidase, N-terminal	nicotine biosynthesis
MSTRG.162178	Nitab4.5_0000745g0170	0.9273	S-adenosylmethionine synthetase, central domain, S-adenosylmethionine synthetase, S-adenosylmethionine synthetase, C-terminal, S-adenosylmethionine synthetase, conserved site, S-adenosylmethionine synthetase superfamily, S-adenosylmethionine synthetase, N-terminal	nicotine biosynthesis
MSTRG.162178	Nitab4.5_0000884g0010	0.9208	NmrA-like, NAD(P)-binding domain	nicotine biosynthesis
MSTRG.162178	Nitab4.5_0001029g0080	0.9424	CO dehydrogenase flavoprotein-like, FAD-binding, subdomain 2, FAD linked oxidase, N-terminal, FAD-binding, type 2, subdomain 1, FAD-binding, type 2	nicotine biosynthesis
MSTRG.162178	Nitab4.5_0001965g0070	0.8786	S-adenosylmethionine decarboxylase, S-adenosylmethionine decarboxylase, conserved site, S-adenosylmethionine decarboxylase subgroup, S-adenosyl-l-methionine decarboxylase leader peptide, S-adenosylmethionine decarboxylase, core	nicotine biosynthesis
MSTRG.162178	Nitab4.5_0002338g0020	0.9055	FAD binding domain, L-aspartate oxidase, Fumarate reductase/succinate dehydrogenase flavoprotein-like, C-terminal, Succinate dehydrogenase/fumarate reductase flavoprotein, catalytic domain, FAD-dependent pyridine nucleotide-disulphide oxidoreductase	nicotine biosynthesis
MSTRG.162178	Nitab4.5_0002522g0070	0.87	Fe-S metabolism associated domain, SufE-like, Quinolinate synthetase A	nicotine biosynthesis
MSTRG.162178	Nitab4.5_0003090g0030	0.8738	AP2/ERF domain, DNA-binding domain	nicotine biosynthesis
MSTRG.162178	Nitab4.5_0006307g0010	0.9231	CO dehydrogenase flavoprotein-like, FAD-binding, subdomain 2, FAD-binding, type 2, FAD-binding, type 2, subdomain 1, FAD linked oxidase, N-terminal, Berberine/berberine-like	nicotine biosynthesis
MSTRG.162178	Nitab4.5_0011232g0010	0.906	Spermidine/spermine synthases family, Putrescine N-methyltransferase	nicotine biosynthesis
MSTRG.162178	Nitab4.5_0015055g0010	0.9209	DNA-binding domain, AP2/ERF domain	nicotine biosynthesis
MSTRG.162310	Nitab4.5_0000003g0720	0.901	Copper amine oxidase, N2-terminal, Copper amine oxidase, Copper amine oxidase, C-terminal, Copper amine oxidase, N-terminal, Copper amine oxidase, N2/N3-terminal, Copper amine oxidase, N3-terminal	nicotine biosynthesis
MSTRG.162314	Nitab4.5_0000745g0170	0.8603	S-adenosylmethionine synthetase, central domain, S-adenosylmethionine synthetase, S-adenosylmethionine synthetase, C-terminal, S-adenosylmethionine synthetase, conserved site, S-adenosylmethionine synthetase superfamily, S-adenosylmethionine synthetase, N-terminal	nicotine biosynthesis	Yes
MSTRG.16271	Nitab4.5_0000031g0370	0.8521	NAD(P)-binding domain, NmrA-like	nicotine biosynthesis	Yes
MSTRG.16271	Nitab4.5_0000316g0090	0.8762	CO dehydrogenase flavoprotein-like, FAD-binding, subdomain 2, FAD-binding, type 2, Berberine/berberine-like, FAD-binding, type 2, subdomain 1, FAD linked oxidase, N-terminal	nicotine biosynthesis	Yes
MSTRG.16271	Nitab4.5_0000884g0010	0.8617	NmrA-like, NAD(P)-binding domain	nicotine biosynthesis	Yes
MSTRG.16271	Nitab4.5_0001029g0080	0.9543	CO dehydrogenase flavoprotein-like, FAD-binding, subdomain 2, FAD linked oxidase, N-terminal, FAD-binding, type 2, subdomain 1, FAD-binding, type 2	nicotine biosynthesis	Yes
MSTRG.16271	Nitab4.5_0006307g0010	0.8656	CO dehydrogenase flavoprotein-like, FAD-binding, subdomain 2, FAD-binding, type 2, FAD-binding, type 2, subdomain 1, FAD linked oxidase, N-terminal, Berberine/berberine-like	nicotine biosynthesis	Yes
MSTRG.16271	Nitab4.5_0015055g0010	0.8525	DNA-binding domain, AP2/ERF domain	nicotine biosynthesis	Yes
MSTRG.162803	Nitab4.5_0004816g0010	0.9168	Nicotinate-nucleotide pyrophosphorylase, Quinolinate phosphoribosyl transferase, C-terminal, Quinolinate phosphoribosyl transferase, N-terminal, Aldolase-type TIM barrel, Nicotinate-nucleotide pyrophosphorylase/Putative pyrophosphorylase ModD	nicotine biosynthesis
MSTRG.162804	Nitab4.5_0004816g0010	0.9164	Nicotinate-nucleotide pyrophosphorylase, Quinolinate phosphoribosyl transferase, C-terminal, Quinolinate phosphoribosyl transferase, N-terminal, Aldolase-type TIM barrel, Nicotinate-nucleotide pyrophosphorylase/Putative pyrophosphorylase ModD	nicotine biosynthesis
MSTRG.163488	Nitab4.5_0000745g0170	0.8828	S-adenosylmethionine synthetase, central domain, S-adenosylmethionine synthetase, S-adenosylmethionine synthetase, C-terminal, S-adenosylmethionine synthetase, conserved site, S-adenosylmethionine synthetase superfamily, S-adenosylmethionine synthetase, N-terminal	nicotine biosynthesis	Yes
MSTRG.163488	Nitab4.5_0001029g0080	0.8524	CO dehydrogenase flavoprotein-like, FAD-binding, subdomain 2, FAD linked oxidase, N-terminal, FAD-binding, type 2, subdomain 1, FAD-binding, type 2	nicotine biosynthesis	Yes
MSTRG.163488	Nitab4.5_0004665g0010	0.8549	S-adenosylmethionine synthetase, conserved site, S-adenosylmethionine synthetase, S-adenosylmethionine synthetase superfamily, S-adenosylmethionine synthetase, C-terminal, S-adenosylmethionine synthetase, central domain, S-adenosylmethionine synthetase, N-terminal	nicotine biosynthesis
MSTRG.163831	Nitab4.5_0000031g0370	0.908	NAD(P)-binding domain, NmrA-like	nicotine biosynthesis
MSTRG.163831	Nitab4.5_0000316g0090	0.9636	CO dehydrogenase flavoprotein-like, FAD-binding, subdomain 2, FAD-binding, type 2, Berberine/berberine-like, FAD-binding, type 2, subdomain 1, FAD linked oxidase, N-terminal	nicotine biosynthesis
MSTRG.163831	Nitab4.5_0000884g0010	0.8967	NmrA-like, NAD(P)-binding domain	nicotine biosynthesis
MSTRG.163831	Nitab4.5_0002338g0020	0.8836	FAD binding domain, L-aspartate oxidase, Fumarate reductase/succinate dehydrogenase flavoprotein-like, C-terminal, Succinate dehydrogenase/fumarate reductase flavoprotein, catalytic domain, FAD-dependent pyridine nucleotide-disulphide oxidoreductase	nicotine biosynthesis
MSTRG.163831	Nitab4.5_0006307g0010	0.8981	CO dehydrogenase flavoprotein-like, FAD-binding, subdomain 2, FAD-binding, type 2, FAD-binding, type 2, subdomain 1, FAD linked oxidase, N-terminal, Berberine/berberine-like	nicotine biosynthesis
MSTRG.163831	Nitab4.5_0011232g0010	0.8844	Spermidine/spermine synthases family, Putrescine N-methyltransferase	nicotine biosynthesis
MSTRG.163831	Nitab4.5_0015055g0010	0.9162	DNA-binding domain, AP2/ERF domain	nicotine biosynthesis
MSTRG.164029	Nitab4.5_0000113g0030	0.9238	Spermidine/spermine synthases family	nicotine biosynthesis
MSTRG.164029	Nitab4.5_0000259g0260	0.8987	S-adenosylmethionine decarboxylase, core, S-adenosyl-l-methionine decarboxylase leader peptide, S-adenosylmethionine decarboxylase, S-adenosylmethionine decarboxylase subgroup, S-adenosylmethionine decarboxylase, conserved site	nicotine biosynthesis
MSTRG.164029	Nitab4.5_0003280g0010	0.8796	Alanine racemase/group IV decarboxylase, C-terminal, Orn/DAP/Arg decarboxylase 2, N-terminal, Ornithine/DAP/Arg decarboxylase, Orn/DAP/Arg decarboxylase 2, conserved site, Orn/DAP/Arg decarboxylase 2, pyridoxal-phosphate binding site, Orn/DAP/Arg decarboxylase 2, C-terminal, Ornithine decarboxylase	nicotine biosynthesis
MSTRG.164029	Nitab4.5_0010954g0020	0.9075	Spermidine/spermine synthases family	nicotine biosynthesis
MSTRG.164122	Nitab4.5_0001965g0070	0.8619	S-adenosylmethionine decarboxylase, S-adenosylmethionine decarboxylase, conserved site, S-adenosylmethionine decarboxylase subgroup, S-adenosyl-l-methionine decarboxylase leader peptide, S-adenosylmethionine decarboxylase, core	nicotine biosynthesis
MSTRG.164300	Nitab4.5_0004665g0010	0.8631	S-adenosylmethionine synthetase, conserved site, S-adenosylmethionine synthetase, S-adenosylmethionine synthetase superfamily, S-adenosylmethionine synthetase, C-terminal, S-adenosylmethionine synthetase, central domain, S-adenosylmethionine synthetase, N-terminal	nicotine biosynthesis
MSTRG.164404	Nitab4.5_0004816g0010	0.9747	Nicotinate-nucleotide pyrophosphorylase, Quinolinate phosphoribosyl transferase, C-terminal, Quinolinate phosphoribosyl transferase, N-terminal, Aldolase-type TIM barrel, Nicotinate-nucleotide pyrophosphorylase/Putative pyrophosphorylase ModD	nicotine biosynthesis
MSTRG.164799	Nitab4.5_0000063g0120	0.8763	S-adenosylmethionine synthetase, conserved site, S-adenosylmethionine synthetase superfamily, S-adenosylmethionine synthetase, N-terminal, S-adenosylmethionine synthetase, S-adenosylmethionine synthetase, C-terminal, S-adenosylmethionine synthetase, central domain	nicotine biosynthesis	Yes
MSTRG.164799	Nitab4.5_0000745g0170	0.9231	S-adenosylmethionine synthetase, central domain, S-adenosylmethionine synthetase, S-adenosylmethionine synthetase, C-terminal, S-adenosylmethionine synthetase, conserved site, S-adenosylmethionine synthetase superfamily, S-adenosylmethionine synthetase, N-terminal	nicotine biosynthesis	Yes
MSTRG.164799	Nitab4.5_0001029g0080	0.8801	CO dehydrogenase flavoprotein-like, FAD-binding, subdomain 2, FAD linked oxidase, N-terminal, FAD-binding, type 2, subdomain 1, FAD-binding, type 2	nicotine biosynthesis	Yes
MSTRG.164799	Nitab4.5_0001965g0070	0.8523	S-adenosylmethionine decarboxylase, S-adenosylmethionine decarboxylase, conserved site, S-adenosylmethionine decarboxylase subgroup, S-adenosyl-l-methionine decarboxylase leader peptide, S-adenosylmethionine decarboxylase, core	nicotine biosynthesis	Yes
MSTRG.164799	Nitab4.5_0004665g0010	0.8597	S-adenosylmethionine synthetase, conserved site, S-adenosylmethionine synthetase, S-adenosylmethionine synthetase superfamily, S-adenosylmethionine synthetase, C-terminal, S-adenosylmethionine synthetase, central domain, S-adenosylmethionine synthetase, N-terminal	nicotine biosynthesis
MSTRG.165719	Nitab4.5_0000013g0380	0.8565	Spermidine/spermine synthases family	nicotine biosynthesis	Yes
MSTRG.165719	Nitab4.5_0000025g0290	0.8624	Copper amine oxidase, C-terminal, Copper amine oxidase, N2-terminal, Copper amine oxidase, N3-terminal, Copper amine oxidase, N-terminal, Copper amine oxidase, N2/N3-terminal, Copper amine oxidase	nicotine biosynthesis	Yes
MSTRG.165719	Nitab4.5_0000031g0370	0.9026	NAD(P)-binding domain, NmrA-like	nicotine biosynthesis	Yes
MSTRG.165719	Nitab4.5_0000316g0090	0.9191	CO dehydrogenase flavoprotein-like, FAD-binding, subdomain 2, FAD-binding, type 2, Berberine/berberine-like, FAD-binding, type 2, subdomain 1, FAD linked oxidase, N-terminal	nicotine biosynthesis	Yes
MSTRG.165719	Nitab4.5_0000745g0170	0.8894	S-adenosylmethionine synthetase, central domain, S-adenosylmethionine synthetase, S-adenosylmethionine synthetase, C-terminal, S-adenosylmethionine synthetase, conserved site, S-adenosylmethionine synthetase superfamily, S-adenosylmethionine synthetase, N-terminal	nicotine biosynthesis	Yes
MSTRG.165719	Nitab4.5_0000884g0010	0.9132	NmrA-like, NAD(P)-binding domain	nicotine biosynthesis	Yes
MSTRG.165719	Nitab4.5_0001029g0080	0.9777	CO dehydrogenase flavoprotein-like, FAD-binding, subdomain 2, FAD linked oxidase, N-terminal, FAD-binding, type 2, subdomain 1, FAD-binding, type 2	nicotine biosynthesis	Yes
MSTRG.165719	Nitab4.5_0002338g0020	0.8992	FAD binding domain, L-aspartate oxidase, Fumarate reductase/succinate dehydrogenase flavoprotein-like, C-terminal, Succinate dehydrogenase/fumarate reductase flavoprotein, catalytic domain, FAD-dependent pyridine nucleotide-disulphide oxidoreductase	nicotine biosynthesis	Yes
MSTRG.165719	Nitab4.5_0003090g0030	0.8853	AP2/ERF domain, DNA-binding domain	nicotine biosynthesis	Yes
MSTRG.165719	Nitab4.5_0006307g0010	0.9103	CO dehydrogenase flavoprotein-like, FAD-binding, subdomain 2, FAD-binding, type 2, FAD-binding, type 2, subdomain 1, FAD linked oxidase, N-terminal, Berberine/berberine-like	nicotine biosynthesis	Yes
MSTRG.165719	Nitab4.5_0011232g0010	0.9009	Spermidine/spermine synthases family, Putrescine N-methyltransferase	nicotine biosynthesis	Yes
MSTRG.165719	Nitab4.5_0015055g0010	0.9009	DNA-binding domain, AP2/ERF domain	nicotine biosynthesis	Yes
MSTRG.166550	Nitab4.5_0000013g0380	0.9121	Spermidine/spermine synthases family	nicotine biosynthesis
MSTRG.166550	Nitab4.5_0000013g0390	0.9722	Spermidine/spermine synthases family	nicotine biosynthesis
MSTRG.166550	Nitab4.5_0000025g0290	0.9091	Copper amine oxidase, C-terminal, Copper amine oxidase, N2-terminal, Copper amine oxidase, N3-terminal, Copper amine oxidase, N-terminal, Copper amine oxidase, N2/N3-terminal, Copper amine oxidase	nicotine biosynthesis
MSTRG.166550	Nitab4.5_0003090g0030	0.8858	AP2/ERF domain, DNA-binding domain	nicotine biosynthesis
MSTRG.166550	Nitab4.5_0003284g0010	0.9473	Spermidine/spermine synthases family, Putrescine N-methyltransferase	nicotine biosynthesis
MSTRG.166550	Nitab4.5_0003284g0040	0.9188	Spermidine/spermine synthases family, Putrescine N-methyltransferase	nicotine biosynthesis
MSTRG.166591	Nitab4.5_0000031g0370	0.8746	NAD(P)-binding domain, NmrA-like	nicotine biosynthesis	Yes
MSTRG.166591	Nitab4.5_0000063g0120	0.8782	S-adenosylmethionine synthetase, conserved site, S-adenosylmethionine synthetase superfamily, S-adenosylmethionine synthetase, N-terminal, S-adenosylmethionine synthetase, S-adenosylmethionine synthetase, C-terminal, S-adenosylmethionine synthetase, central domain	nicotine biosynthesis	Yes
MSTRG.166591	Nitab4.5_0000316g0090	0.9285	CO dehydrogenase flavoprotein-like, FAD-binding, subdomain 2, FAD-binding, type 2, Berberine/berberine-like, FAD-binding, type 2, subdomain 1, FAD linked oxidase, N-terminal	nicotine biosynthesis	Yes
MSTRG.166591	Nitab4.5_0000745g0170	0.9509	S-adenosylmethionine synthetase, central domain, S-adenosylmethionine synthetase, S-adenosylmethionine synthetase, C-terminal, S-adenosylmethionine synthetase, conserved site, S-adenosylmethionine synthetase superfamily, S-adenosylmethionine synthetase, N-terminal	nicotine biosynthesis	Yes
MSTRG.166591	Nitab4.5_0000884g0010	0.8837	NmrA-like, NAD(P)-binding domain	nicotine biosynthesis	Yes
MSTRG.166591	Nitab4.5_0001029g0080	0.9736	CO dehydrogenase flavoprotein-like, FAD-binding, subdomain 2, FAD linked oxidase, N-terminal, FAD-binding, type 2, subdomain 1, FAD-binding, type 2	nicotine biosynthesis	Yes
MSTRG.166591	Nitab4.5_0001965g0070	0.8712	S-adenosylmethionine decarboxylase, S-adenosylmethionine decarboxylase, conserved site, S-adenosylmethionine decarboxylase subgroup, S-adenosyl-l-methionine decarboxylase leader peptide, S-adenosylmethionine decarboxylase, core	nicotine biosynthesis	Yes
MSTRG.166591	Nitab4.5_0002338g0020	0.8654	FAD binding domain, L-aspartate oxidase, Fumarate reductase/succinate dehydrogenase flavoprotein-like, C-terminal, Succinate dehydrogenase/fumarate reductase flavoprotein, catalytic domain, FAD-dependent pyridine nucleotide-disulphide oxidoreductase	nicotine biosynthesis	Yes
MSTRG.166591	Nitab4.5_0006307g0010	0.886	CO dehydrogenase flavoprotein-like, FAD-binding, subdomain 2, FAD-binding, type 2, FAD-binding, type 2, subdomain 1, FAD linked oxidase, N-terminal, Berberine/berberine-like	nicotine biosynthesis	Yes
MSTRG.166591	Nitab4.5_0011232g0010	0.8643	Spermidine/spermine synthases family, Putrescine N-methyltransferase	nicotine biosynthesis	Yes
MSTRG.166591	Nitab4.5_0015055g0010	0.8774	DNA-binding domain, AP2/ERF domain	nicotine biosynthesis	Yes
MSTRG.166776	Nitab4.5_0000063g0170	0.8511	similar to S-adenosylmethionine synthase 2	nicotine biosynthesis	Yes
MSTRG.167008	Nitab4.5_0000031g0370	0.8814	NAD(P)-binding domain, NmrA-like	nicotine biosynthesis
MSTRG.167008	Nitab4.5_0000316g0090	0.9296	CO dehydrogenase flavoprotein-like, FAD-binding, subdomain 2, FAD-binding, type 2, Berberine/berberine-like, FAD-binding, type 2, subdomain 1, FAD linked oxidase, N-terminal	nicotine biosynthesis
MSTRG.167008	Nitab4.5_0000745g0170	0.9085	S-adenosylmethionine synthetase, central domain, S-adenosylmethionine synthetase, S-adenosylmethionine synthetase, C-terminal, S-adenosylmethionine synthetase, conserved site, S-adenosylmethionine synthetase superfamily, S-adenosylmethionine synthetase, N-terminal	nicotine biosynthesis
MSTRG.167008	Nitab4.5_0000884g0010	0.8871	NmrA-like, NAD(P)-binding domain	nicotine biosynthesis
MSTRG.167008	Nitab4.5_0001029g0080	0.9295	CO dehydrogenase flavoprotein-like, FAD-binding, subdomain 2, FAD linked oxidase, N-terminal, FAD-binding, type 2, subdomain 1, FAD-binding, type 2	nicotine biosynthesis
MSTRG.167008	Nitab4.5_0001965g0070	0.8698	S-adenosylmethionine decarboxylase, S-adenosylmethionine decarboxylase, conserved site, S-adenosylmethionine decarboxylase subgroup, S-adenosyl-l-methionine decarboxylase leader peptide, S-adenosylmethionine decarboxylase, core	nicotine biosynthesis
MSTRG.167008	Nitab4.5_0002338g0020	0.8718	FAD binding domain, L-aspartate oxidase, Fumarate reductase/succinate dehydrogenase flavoprotein-like, C-terminal, Succinate dehydrogenase/fumarate reductase flavoprotein, catalytic domain, FAD-dependent pyridine nucleotide-disulphide oxidoreductase	nicotine biosynthesis
MSTRG.167008	Nitab4.5_0006307g0010	0.8875	CO dehydrogenase flavoprotein-like, FAD-binding, subdomain 2, FAD-binding, type 2, FAD-binding, type 2, subdomain 1, FAD linked oxidase, N-terminal, Berberine/berberine-like	nicotine biosynthesis
MSTRG.167008	Nitab4.5_0011232g0010	0.8712	Spermidine/spermine synthases family, Putrescine N-methyltransferase	nicotine biosynthesis
MSTRG.167008	Nitab4.5_0015055g0010	0.8837	DNA-binding domain, AP2/ERF domain	nicotine biosynthesis
MSTRG.167349	Nitab4.5_0000063g0120	0.8769	S-adenosylmethionine synthetase, conserved site, S-adenosylmethionine synthetase superfamily, S-adenosylmethionine synthetase, N-terminal, S-adenosylmethionine synthetase, S-adenosylmethionine synthetase, C-terminal, S-adenosylmethionine synthetase, central domain	nicotine biosynthesis	Yes
MSTRG.167349	Nitab4.5_0000745g0170	0.9322	S-adenosylmethionine synthetase, central domain, S-adenosylmethionine synthetase, S-adenosylmethionine synthetase, C-terminal, S-adenosylmethionine synthetase, conserved site, S-adenosylmethionine synthetase superfamily, S-adenosylmethionine synthetase, N-terminal	nicotine biosynthesis	Yes
MSTRG.167349	Nitab4.5_0001029g0080	0.8849	CO dehydrogenase flavoprotein-like, FAD-binding, subdomain 2, FAD linked oxidase, N-terminal, FAD-binding, type 2, subdomain 1, FAD-binding, type 2	nicotine biosynthesis	Yes
MSTRG.167349	Nitab4.5_0001965g0070	0.8586	S-adenosylmethionine decarboxylase, S-adenosylmethionine decarboxylase, conserved site, S-adenosylmethionine decarboxylase subgroup, S-adenosyl-l-methionine decarboxylase leader peptide, S-adenosylmethionine decarboxylase, core	nicotine biosynthesis	Yes
MSTRG.167749	Nitab4.5_0000013g0390	0.869	Spermidine/spermine synthases family	nicotine biosynthesis
MSTRG.16779	Nitab4.5_0004816g0010	0.9813	Nicotinate-nucleotide pyrophosphorylase, Quinolinate phosphoribosyl transferase, C-terminal, Quinolinate phosphoribosyl transferase, N-terminal, Aldolase-type TIM barrel, Nicotinate-nucleotide pyrophosphorylase/Putative pyrophosphorylase ModD	nicotine biosynthesis
MSTRG.16781	Nitab4.5_0004816g0010	0.9279	Nicotinate-nucleotide pyrophosphorylase, Quinolinate phosphoribosyl transferase, C-terminal, Quinolinate phosphoribosyl transferase, N-terminal, Aldolase-type TIM barrel, Nicotinate-nucleotide pyrophosphorylase/Putative pyrophosphorylase ModD	nicotine biosynthesis
MSTRG.167832	Nitab4.5_0000814g0090	0.8659	S-adenosylmethionine synthetase superfamily, S-adenosylmethionine synthetase, N-terminal, S-adenosylmethionine synthetase, C-terminal, S-adenosylmethionine synthetase, S-adenosylmethionine synthetase, conserved site, S-adenosylmethionine synthetase, central domain	nicotine biosynthesis
MSTRG.168019	Nitab4.5_0003029g0020	0.8609	Berberine/berberine-like, CO dehydrogenase flavoprotein-like, FAD-binding, subdomain 2, FAD-binding, type 2, FAD linked oxidase, N-terminal, FAD-binding, type 2, subdomain 1	nicotine biosynthesis
MSTRG.168788	Nitab4.5_0000003g0720	0.8811	Copper amine oxidase, N2-terminal, Copper amine oxidase, Copper amine oxidase, C-terminal, Copper amine oxidase, N-terminal, Copper amine oxidase, N2/N3-terminal, Copper amine oxidase, N3-terminal	nicotine biosynthesis
MSTRG.168948	Nitab4.5_0001029g0080	0.907	CO dehydrogenase flavoprotein-like, FAD-binding, subdomain 2, FAD linked oxidase, N-terminal, FAD-binding, type 2, subdomain 1, FAD-binding, type 2	nicotine biosynthesis	Yes
MSTRG.168948	Nitab4.5_0001965g0070	0.876	S-adenosylmethionine decarboxylase, S-adenosylmethionine decarboxylase, conserved site, S-adenosylmethionine decarboxylase subgroup, S-adenosyl-l-methionine decarboxylase leader peptide, S-adenosylmethionine decarboxylase, core	nicotine biosynthesis	Yes
MSTRG.169185	Nitab4.5_0000031g0370	0.8512	NAD(P)-binding domain, NmrA-like	nicotine biosynthesis	Yes
MSTRG.169185	Nitab4.5_0000316g0090	0.8845	CO dehydrogenase flavoprotein-like, FAD-binding, subdomain 2, FAD-binding, type 2, Berberine/berberine-like, FAD-binding, type 2, subdomain 1, FAD linked oxidase, N-terminal	nicotine biosynthesis	Yes
MSTRG.169185	Nitab4.5_0000884g0010	0.8594	NmrA-like, NAD(P)-binding domain	nicotine biosynthesis	Yes
MSTRG.169185	Nitab4.5_0001029g0080	0.9304	CO dehydrogenase flavoprotein-like, FAD-binding, subdomain 2, FAD linked oxidase, N-terminal, FAD-binding, type 2, subdomain 1, FAD-binding, type 2	nicotine biosynthesis	Yes
MSTRG.169185	Nitab4.5_0001965g0070	0.8557	S-adenosylmethionine decarboxylase, S-adenosylmethionine decarboxylase, conserved site, S-adenosylmethionine decarboxylase subgroup, S-adenosyl-l-methionine decarboxylase leader peptide, S-adenosylmethionine decarboxylase, core	nicotine biosynthesis	Yes
MSTRG.169185	Nitab4.5_0006307g0010	0.8652	CO dehydrogenase flavoprotein-like, FAD-binding, subdomain 2, FAD-binding, type 2, FAD-binding, type 2, subdomain 1, FAD linked oxidase, N-terminal, Berberine/berberine-like	nicotine biosynthesis	Yes
MSTRG.169185	Nitab4.5_0015055g0010	0.8526	DNA-binding domain, AP2/ERF domain	nicotine biosynthesis	Yes
MSTRG.169362	Nitab4.5_0000155g0200	0.9085	S-adenosylmethionine synthetase superfamily, S-adenosylmethionine synthetase, conserved site, S-adenosylmethionine synthetase, S-adenosylmethionine synthetase, N-terminal, S-adenosylmethionine synthetase, central domain, S-adenosylmethionine synthetase, C-terminal	nicotine biosynthesis
MSTRG.169476	Nitab4.5_0000063g0120	0.9106	S-adenosylmethionine synthetase, conserved site, S-adenosylmethionine synthetase superfamily, S-adenosylmethionine synthetase, N-terminal, S-adenosylmethionine synthetase, S-adenosylmethionine synthetase, C-terminal, S-adenosylmethionine synthetase, central domain	nicotine biosynthesis
MSTRG.169476	Nitab4.5_0000745g0170	0.9739	S-adenosylmethionine synthetase, central domain, S-adenosylmethionine synthetase, S-adenosylmethionine synthetase, C-terminal, S-adenosylmethionine synthetase, conserved site, S-adenosylmethionine synthetase superfamily, S-adenosylmethionine synthetase, N-terminal	nicotine biosynthesis
MSTRG.169476	Nitab4.5_0001029g0080	0.8918	CO dehydrogenase flavoprotein-like, FAD-binding, subdomain 2, FAD linked oxidase, N-terminal, FAD-binding, type 2, subdomain 1, FAD-binding, type 2	nicotine biosynthesis
MSTRG.169476	Nitab4.5_0004665g0010	0.8552	S-adenosylmethionine synthetase, conserved site, S-adenosylmethionine synthetase, S-adenosylmethionine synthetase superfamily, S-adenosylmethionine synthetase, C-terminal, S-adenosylmethionine synthetase, central domain, S-adenosylmethionine synthetase, N-terminal	nicotine biosynthesis
MSTRG.169582	Nitab4.5_0000031g0370	0.8511	NAD(P)-binding domain, NmrA-like	nicotine biosynthesis	Yes
MSTRG.169582	Nitab4.5_0000316g0090	0.8952	CO dehydrogenase flavoprotein-like, FAD-binding, subdomain 2, FAD-binding, type 2, Berberine/berberine-like, FAD-binding, type 2, subdomain 1, FAD linked oxidase, N-terminal	nicotine biosynthesis	Yes
MSTRG.169582	Nitab4.5_0000884g0010	0.858	NmrA-like, NAD(P)-binding domain	nicotine biosynthesis	Yes
MSTRG.169582	Nitab4.5_0001029g0080	0.9061	CO dehydrogenase flavoprotein-like, FAD-binding, subdomain 2, FAD linked oxidase, N-terminal, FAD-binding, type 2, subdomain 1, FAD-binding, type 2	nicotine biosynthesis	Yes
MSTRG.169582	Nitab4.5_0006307g0010	0.8755	CO dehydrogenase flavoprotein-like, FAD-binding, subdomain 2, FAD-binding, type 2, FAD-binding, type 2, subdomain 1, FAD linked oxidase, N-terminal, Berberine/berberine-like	nicotine biosynthesis	Yes
MSTRG.169582	Nitab4.5_0015055g0010	0.857	DNA-binding domain, AP2/ERF domain	nicotine biosynthesis	Yes
MSTRG.169754	Nitab4.5_0000316g0090	0.8634	CO dehydrogenase flavoprotein-like, FAD-binding, subdomain 2, FAD-binding, type 2, Berberine/berberine-like, FAD-binding, type 2, subdomain 1, FAD linked oxidase, N-terminal	nicotine biosynthesis
MSTRG.169754	Nitab4.5_0000745g0170	0.863	S-adenosylmethionine synthetase, central domain, S-adenosylmethionine synthetase, S-adenosylmethionine synthetase, C-terminal, S-adenosylmethionine synthetase, conserved site, S-adenosylmethionine synthetase superfamily, S-adenosylmethionine synthetase, N-terminal	nicotine biosynthesis
MSTRG.169754	Nitab4.5_0001029g0080	0.8632	CO dehydrogenase flavoprotein-like, FAD-binding, subdomain 2, FAD linked oxidase, N-terminal, FAD-binding, type 2, subdomain 1, FAD-binding, type 2	nicotine biosynthesis
MSTRG.169754	Nitab4.5_0001965g0070	0.8766	S-adenosylmethionine decarboxylase, S-adenosylmethionine decarboxylase, conserved site, S-adenosylmethionine decarboxylase subgroup, S-adenosyl-l-methionine decarboxylase leader peptide, S-adenosylmethionine decarboxylase, core	nicotine biosynthesis
MSTRG.169840	Nitab4.5_0001029g0080	0.8573	CO dehydrogenase flavoprotein-like, FAD-binding, subdomain 2, FAD linked oxidase, N-terminal, FAD-binding, type 2, subdomain 1, FAD-binding, type 2	nicotine biosynthesis	Yes
MSTRG.170076	Nitab4.5_0004816g0010	0.9286	Nicotinate-nucleotide pyrophosphorylase, Quinolinate phosphoribosyl transferase, C-terminal, Quinolinate phosphoribosyl transferase, N-terminal, Aldolase-type TIM barrel, Nicotinate-nucleotide pyrophosphorylase/Putative pyrophosphorylase ModD	nicotine biosynthesis
MSTRG.170209	Nitab4.5_0000063g0120	0.8772	S-adenosylmethionine synthetase, conserved site, S-adenosylmethionine synthetase superfamily, S-adenosylmethionine synthetase, N-terminal, S-adenosylmethionine synthetase, S-adenosylmethionine synthetase, C-terminal, S-adenosylmethionine synthetase, central domain	nicotine biosynthesis	Yes
MSTRG.170209	Nitab4.5_0000745g0170	0.888	S-adenosylmethionine synthetase, central domain, S-adenosylmethionine synthetase, S-adenosylmethionine synthetase, C-terminal, S-adenosylmethionine synthetase, conserved site, S-adenosylmethionine synthetase superfamily, S-adenosylmethionine synthetase, N-terminal	nicotine biosynthesis	Yes
MSTRG.170209	Nitab4.5_0001029g0080	0.9235	CO dehydrogenase flavoprotein-like, FAD-binding, subdomain 2, FAD linked oxidase, N-terminal, FAD-binding, type 2, subdomain 1, FAD-binding, type 2	nicotine biosynthesis	Yes
MSTRG.170317	Nitab4.5_0000063g0120	0.8807	S-adenosylmethionine synthetase, conserved site, S-adenosylmethionine synthetase superfamily, S-adenosylmethionine synthetase, N-terminal, S-adenosylmethionine synthetase, S-adenosylmethionine synthetase, C-terminal, S-adenosylmethionine synthetase, central domain	nicotine biosynthesis	Yes
MSTRG.170317	Nitab4.5_0000745g0170	0.9068	S-adenosylmethionine synthetase, central domain, S-adenosylmethionine synthetase, S-adenosylmethionine synthetase, C-terminal, S-adenosylmethionine synthetase, conserved site, S-adenosylmethionine synthetase superfamily, S-adenosylmethionine synthetase, N-terminal	nicotine biosynthesis	Yes
MSTRG.170317	Nitab4.5_0001029g0080	0.8704	CO dehydrogenase flavoprotein-like, FAD-binding, subdomain 2, FAD linked oxidase, N-terminal, FAD-binding, type 2, subdomain 1, FAD-binding, type 2	nicotine biosynthesis	Yes
MSTRG.170651	Nitab4.5_0000113g0030	0.9236	Spermidine/spermine synthases family	nicotine biosynthesis
MSTRG.170651	Nitab4.5_0000259g0260	0.895	S-adenosylmethionine decarboxylase, core, S-adenosyl-l-methionine decarboxylase leader peptide, S-adenosylmethionine decarboxylase, S-adenosylmethionine decarboxylase subgroup, S-adenosylmethionine decarboxylase, conserved site	nicotine biosynthesis
MSTRG.170651	Nitab4.5_0003280g0010	0.8816	Alanine racemase/group IV decarboxylase, C-terminal, Orn/DAP/Arg decarboxylase 2, N-terminal, Ornithine/DAP/Arg decarboxylase, Orn/DAP/Arg decarboxylase 2, conserved site, Orn/DAP/Arg decarboxylase 2, pyridoxal-phosphate binding site, Orn/DAP/Arg decarboxylase 2, C-terminal, Ornithine decarboxylase	nicotine biosynthesis
MSTRG.170651	Nitab4.5_0010954g0020	0.9189	Spermidine/spermine synthases family	nicotine biosynthesis
MSTRG.170702	Nitab4.5_0000063g0120	0.8577	S-adenosylmethionine synthetase, conserved site, S-adenosylmethionine synthetase superfamily, S-adenosylmethionine synthetase, N-terminal, S-adenosylmethionine synthetase, S-adenosylmethionine synthetase, C-terminal, S-adenosylmethionine synthetase, central domain	nicotine biosynthesis	Yes
MSTRG.170702	Nitab4.5_0000063g0170	0.9026	similar to S-adenosylmethionine synthase 2	nicotine biosynthesis	Yes
MSTRG.170702	Nitab4.5_0001029g0080	0.8916	CO dehydrogenase flavoprotein-like, FAD-binding, subdomain 2, FAD linked oxidase, N-terminal, FAD-binding, type 2, subdomain 1, FAD-binding, type 2	nicotine biosynthesis	Yes
MSTRG.171089	Nitab4.5_0000155g0200	0.8726	S-adenosylmethionine synthetase superfamily, S-adenosylmethionine synthetase, conserved site, S-adenosylmethionine synthetase, S-adenosylmethionine synthetase, N-terminal, S-adenosylmethionine synthetase, central domain, S-adenosylmethionine synthetase, C-terminal	nicotine biosynthesis
MSTRG.171185	Nitab4.5_0000814g0090	0.9018	S-adenosylmethionine synthetase superfamily, S-adenosylmethionine synthetase, N-terminal, S-adenosylmethionine synthetase, C-terminal, S-adenosylmethionine synthetase, S-adenosylmethionine synthetase, conserved site, S-adenosylmethionine synthetase, central domain	nicotine biosynthesis
MSTRG.171185	Nitab4.5_0008624g0040	0.8703	S-adenosylmethionine synthetase, S-adenosylmethionine synthetase, N-terminal, S-adenosylmethionine synthetase superfamily, S-adenosylmethionine synthetase, conserved site, S-adenosylmethionine synthetase, C-terminal, S-adenosylmethionine synthetase, central domain	nicotine biosynthesis
MSTRG.171566	Nitab4.5_0003280g0010	0.8797	Alanine racemase/group IV decarboxylase, C-terminal, Orn/DAP/Arg decarboxylase 2, N-terminal, Ornithine/DAP/Arg decarboxylase, Orn/DAP/Arg decarboxylase 2, conserved site, Orn/DAP/Arg decarboxylase 2, pyridoxal-phosphate binding site, Orn/DAP/Arg decarboxylase 2, C-terminal, Ornithine decarboxylase	nicotine biosynthesis
MSTRG.171612	Nitab4.5_0000003g0720	0.8549	Copper amine oxidase, N2-terminal, Copper amine oxidase, Copper amine oxidase, C-terminal, Copper amine oxidase, N-terminal, Copper amine oxidase, N2/N3-terminal, Copper amine oxidase, N3-terminal	nicotine biosynthesis
MSTRG.171728	Nitab4.5_0000895g0150	0.9033	S-adenosylmethionine synthetase superfamily, S-adenosylmethionine synthetase, conserved site, S-adenosylmethionine synthetase, central domain, S-adenosylmethionine synthetase, S-adenosylmethionine synthetase, C-terminal, S-adenosylmethionine synthetase, N-terminal	nicotine biosynthesis
MSTRG.171728	Nitab4.5_0004665g0010	0.9159	S-adenosylmethionine synthetase, conserved site, S-adenosylmethionine synthetase, S-adenosylmethionine synthetase superfamily, S-adenosylmethionine synthetase, C-terminal, S-adenosylmethionine synthetase, central domain, S-adenosylmethionine synthetase, N-terminal	nicotine biosynthesis
MSTRG.171848	Nitab4.5_0001029g0080	0.8638	CO dehydrogenase flavoprotein-like, FAD-binding, subdomain 2, FAD linked oxidase, N-terminal, FAD-binding, type 2, subdomain 1, FAD-binding, type 2	nicotine biosynthesis
MSTRG.172272	Nitab4.5_0004816g0010	0.9302	Nicotinate-nucleotide pyrophosphorylase, Quinolinate phosphoribosyl transferase, C-terminal, Quinolinate phosphoribosyl transferase, N-terminal, Aldolase-type TIM barrel, Nicotinate-nucleotide pyrophosphorylase/Putative pyrophosphorylase ModD	nicotine biosynthesis
MSTRG.172451	Nitab4.5_0000013g0380	0.887	Spermidine/spermine synthases family	nicotine biosynthesis	Yes
MSTRG.172451	Nitab4.5_0000013g0390	0.8671	Spermidine/spermine synthases family	nicotine biosynthesis
MSTRG.172451	Nitab4.5_0000025g0290	0.8718	Copper amine oxidase, C-terminal, Copper amine oxidase, N2-terminal, Copper amine oxidase, N3-terminal, Copper amine oxidase, N-terminal, Copper amine oxidase, N2/N3-terminal, Copper amine oxidase	nicotine biosynthesis	Yes
MSTRG.172451	Nitab4.5_0000031g0370	0.8936	NAD(P)-binding domain, NmrA-like	nicotine biosynthesis	Yes
MSTRG.172451	Nitab4.5_0000316g0090	0.8702	CO dehydrogenase flavoprotein-like, FAD-binding, subdomain 2, FAD-binding, type 2, Berberine/berberine-like, FAD-binding, type 2, subdomain 1, FAD linked oxidase, N-terminal	nicotine biosynthesis	Yes
MSTRG.172451	Nitab4.5_0000884g0010	0.9081	NmrA-like, NAD(P)-binding domain	nicotine biosynthesis	Yes
MSTRG.172451	Nitab4.5_0001029g0080	0.8916	CO dehydrogenase flavoprotein-like, FAD-binding, subdomain 2, FAD linked oxidase, N-terminal, FAD-binding, type 2, subdomain 1, FAD-binding, type 2	nicotine biosynthesis	Yes
MSTRG.172451	Nitab4.5_0002338g0020	0.9019	FAD binding domain, L-aspartate oxidase, Fumarate reductase/succinate dehydrogenase flavoprotein-like, C-terminal, Succinate dehydrogenase/fumarate reductase flavoprotein, catalytic domain, FAD-dependent pyridine nucleotide-disulphide oxidoreductase	nicotine biosynthesis	Yes
MSTRG.172451	Nitab4.5_0003090g0030	0.9031	AP2/ERF domain, DNA-binding domain	nicotine biosynthesis	Yes
MSTRG.172451	Nitab4.5_0003284g0010	0.8693	Spermidine/spermine synthases family, Putrescine N-methyltransferase	nicotine biosynthesis	Yes
MSTRG.172451	Nitab4.5_0003284g0040	0.8597	Spermidine/spermine synthases family, Putrescine N-methyltransferase	nicotine biosynthesis	Yes
MSTRG.172451	Nitab4.5_0005830g0010	0.8522	Succinate dehydrogenase/fumarate reductase flavoprotein, catalytic domain, Fumarate reductase/succinate dehydrogenase flavoprotein-like, C-terminal, FAD binding domain, L-aspartate oxidase, FAD-dependent pyridine nucleotide-disulphide oxidoreductase	nicotine biosynthesis	Yes
MSTRG.172451	Nitab4.5_0006307g0010	0.9008	CO dehydrogenase flavoprotein-like, FAD-binding, subdomain 2, FAD-binding, type 2, FAD-binding, type 2, subdomain 1, FAD linked oxidase, N-terminal, Berberine/berberine-like	nicotine biosynthesis	Yes
MSTRG.172451	Nitab4.5_0011232g0010	0.8983	Spermidine/spermine synthases family, Putrescine N-methyltransferase	nicotine biosynthesis	Yes
MSTRG.172451	Nitab4.5_0015055g0010	0.8884	DNA-binding domain, AP2/ERF domain	nicotine biosynthesis	Yes
MSTRG.172671	Nitab4.5_0000745g0170	0.8974	S-adenosylmethionine synthetase, central domain, S-adenosylmethionine synthetase, S-adenosylmethionine synthetase, C-terminal, S-adenosylmethionine synthetase, conserved site, S-adenosylmethionine synthetase superfamily, S-adenosylmethionine synthetase, N-terminal	nicotine biosynthesis
MSTRG.172671	Nitab4.5_0001965g0070	0.8627	S-adenosylmethionine decarboxylase, S-adenosylmethionine decarboxylase, conserved site, S-adenosylmethionine decarboxylase subgroup, S-adenosyl-l-methionine decarboxylase leader peptide, S-adenosylmethionine decarboxylase, core	nicotine biosynthesis
MSTRG.172674	Nitab4.5_0004816g0010	0.9685	Nicotinate-nucleotide pyrophosphorylase, Quinolinate phosphoribosyl transferase, C-terminal, Quinolinate phosphoribosyl transferase, N-terminal, Aldolase-type TIM barrel, Nicotinate-nucleotide pyrophosphorylase/Putative pyrophosphorylase ModD	nicotine biosynthesis
MSTRG.17269	Nitab4.5_0001270g0090	0.8559	Alanine racemase/group IV decarboxylase, C-terminal, Ornithine decarboxylase, Orn/DAP/Arg decarboxylase 2, pyridoxal-phosphate binding site, Orn/DAP/Arg decarboxylase 2, N-terminal, Orn/DAP/Arg decarboxylase 2, C-terminal, Ornithine/DAP/Arg decarboxylase	nicotine biosynthesis
MSTRG.172722	Nitab4.5_0000578g0090	0.8865	S-adenosylmethionine synthetase, central domain, S-adenosylmethionine synthetase, conserved site, S-adenosylmethionine synthetase, S-adenosylmethionine synthetase superfamily, S-adenosylmethionine synthetase, C-terminal, S-adenosylmethionine synthetase, N-terminal	nicotine biosynthesis
MSTRG.172851	Nitab4.5_0000003g0720	0.8735	Copper amine oxidase, N2-terminal, Copper amine oxidase, Copper amine oxidase, C-terminal, Copper amine oxidase, N-terminal, Copper amine oxidase, N2/N3-terminal, Copper amine oxidase, N3-terminal	nicotine biosynthesis
MSTRG.172920	Nitab4.5_0000013g0380	0.8566	Spermidine/spermine synthases family	nicotine biosynthesis	Yes
MSTRG.172920	Nitab4.5_0000013g0390	0.8737	Spermidine/spermine synthases family	nicotine biosynthesis
MSTRG.172920	Nitab4.5_0000025g0290	0.8652	Copper amine oxidase, C-terminal, Copper amine oxidase, N2-terminal, Copper amine oxidase, N3-terminal, Copper amine oxidase, N-terminal, Copper amine oxidase, N2/N3-terminal, Copper amine oxidase	nicotine biosynthesis	Yes
MSTRG.172920	Nitab4.5_0003090g0030	0.857	AP2/ERF domain, DNA-binding domain	nicotine biosynthesis	Yes
MSTRG.172920	Nitab4.5_0003284g0010	0.8622	Spermidine/spermine synthases family, Putrescine N-methyltransferase	nicotine biosynthesis	Yes
MSTRG.172920	Nitab4.5_0003284g0040	0.8544	Spermidine/spermine synthases family, Putrescine N-methyltransferase	nicotine biosynthesis	Yes
MSTRG.172995	Nitab4.5_0000063g0170	0.8824	similar to S-adenosylmethionine synthase 2	nicotine biosynthesis	Yes
MSTRG.173168	Nitab4.5_0000745g0170	0.8585	S-adenosylmethionine synthetase, central domain, S-adenosylmethionine synthetase, S-adenosylmethionine synthetase, C-terminal, S-adenosylmethionine synthetase, conserved site, S-adenosylmethionine synthetase superfamily, S-adenosylmethionine synthetase, N-terminal	nicotine biosynthesis	Yes
MSTRG.173168	Nitab4.5_0001029g0080	0.8826	CO dehydrogenase flavoprotein-like, FAD-binding, subdomain 2, FAD linked oxidase, N-terminal, FAD-binding, type 2, subdomain 1, FAD-binding, type 2	nicotine biosynthesis	Yes
MSTRG.173209	Nitab4.5_0000742g0010	0.8539	Quinolinate phosphoribosyl transferase, C-terminal, Quinolinate phosphoribosyl transferase, N-terminal, Nicotinate-nucleotide pyrophosphorylase, Aldolase-type TIM barrel	nicotine biosynthesis
MSTRG.173209	Nitab4.5_0004816g0010	0.9137	Nicotinate-nucleotide pyrophosphorylase, Quinolinate phosphoribosyl transferase, C-terminal, Quinolinate phosphoribosyl transferase, N-terminal, Aldolase-type TIM barrel, Nicotinate-nucleotide pyrophosphorylase/Putative pyrophosphorylase ModD	nicotine biosynthesis
MSTRG.173387	Nitab4.5_0000031g0370	0.9192	NAD(P)-binding domain, NmrA-like	nicotine biosynthesis	Yes
MSTRG.173387	Nitab4.5_0000316g0090	0.9759	CO dehydrogenase flavoprotein-like, FAD-binding, subdomain 2, FAD-binding, type 2, Berberine/berberine-like, FAD-binding, type 2, subdomain 1, FAD linked oxidase, N-terminal	nicotine biosynthesis	Yes
MSTRG.173387	Nitab4.5_0000745g0170	0.9292	S-adenosylmethionine synthetase, central domain, S-adenosylmethionine synthetase, S-adenosylmethionine synthetase, C-terminal, S-adenosylmethionine synthetase, conserved site, S-adenosylmethionine synthetase superfamily, S-adenosylmethionine synthetase, N-terminal	nicotine biosynthesis	Yes
MSTRG.173387	Nitab4.5_0000884g0010	0.9203	NmrA-like, NAD(P)-binding domain	nicotine biosynthesis	Yes
MSTRG.173387	Nitab4.5_0001029g0080	0.9388	CO dehydrogenase flavoprotein-like, FAD-binding, subdomain 2, FAD linked oxidase, N-terminal, FAD-binding, type 2, subdomain 1, FAD-binding, type 2	nicotine biosynthesis	Yes
MSTRG.173387	Nitab4.5_0001965g0070	0.8794	S-adenosylmethionine decarboxylase, S-adenosylmethionine decarboxylase, conserved site, S-adenosylmethionine decarboxylase subgroup, S-adenosyl-l-methionine decarboxylase leader peptide, S-adenosylmethionine decarboxylase, core	nicotine biosynthesis	Yes
MSTRG.173387	Nitab4.5_0002338g0020	0.9033	FAD binding domain, L-aspartate oxidase, Fumarate reductase/succinate dehydrogenase flavoprotein-like, C-terminal, Succinate dehydrogenase/fumarate reductase flavoprotein, catalytic domain, FAD-dependent pyridine nucleotide-disulphide oxidoreductase	nicotine biosynthesis	Yes
MSTRG.173387	Nitab4.5_0002522g0070	0.8713	Fe-S metabolism associated domain, SufE-like, Quinolinate synthetase A	nicotine biosynthesis	Yes
MSTRG.173387	Nitab4.5_0003090g0030	0.865	AP2/ERF domain, DNA-binding domain	nicotine biosynthesis	Yes
MSTRG.173387	Nitab4.5_0006307g0010	0.924	CO dehydrogenase flavoprotein-like, FAD-binding, subdomain 2, FAD-binding, type 2, FAD-binding, type 2, subdomain 1, FAD linked oxidase, N-terminal, Berberine/berberine-like	nicotine biosynthesis	Yes
MSTRG.173387	Nitab4.5_0011232g0010	0.9034	Spermidine/spermine synthases family, Putrescine N-methyltransferase	nicotine biosynthesis	Yes
MSTRG.173387	Nitab4.5_0015055g0010	0.9249	DNA-binding domain, AP2/ERF domain	nicotine biosynthesis	Yes
MSTRG.173879	Nitab4.5_0004816g0010	0.9856	Nicotinate-nucleotide pyrophosphorylase, Quinolinate phosphoribosyl transferase, C-terminal, Quinolinate phosphoribosyl transferase, N-terminal, Aldolase-type TIM barrel, Nicotinate-nucleotide pyrophosphorylase/Putative pyrophosphorylase ModD	nicotine biosynthesis
MSTRG.174004	Nitab4.5_0000013g0380	0.9051	Spermidine/spermine synthases family	nicotine biosynthesis	Yes
MSTRG.174004	Nitab4.5_0000013g0390	0.9152	Spermidine/spermine synthases family	nicotine biosynthesis
MSTRG.174004	Nitab4.5_0000025g0290	0.8981	Copper amine oxidase, C-terminal, Copper amine oxidase, N2-terminal, Copper amine oxidase, N3-terminal, Copper amine oxidase, N-terminal, Copper amine oxidase, N2/N3-terminal, Copper amine oxidase	nicotine biosynthesis	Yes
MSTRG.174004	Nitab4.5_0000031g0370	0.878	NAD(P)-binding domain, NmrA-like	nicotine biosynthesis	Yes
MSTRG.174004	Nitab4.5_0000884g0010	0.8932	NmrA-like, NAD(P)-binding domain	nicotine biosynthesis	Yes
MSTRG.174004	Nitab4.5_0002338g0020	0.8926	FAD binding domain, L-aspartate oxidase, Fumarate reductase/succinate dehydrogenase flavoprotein-like, C-terminal, Succinate dehydrogenase/fumarate reductase flavoprotein, catalytic domain, FAD-dependent pyridine nucleotide-disulphide oxidoreductase	nicotine biosynthesis	Yes
MSTRG.174004	Nitab4.5_0003090g0030	0.9134	AP2/ERF domain, DNA-binding domain	nicotine biosynthesis	Yes
MSTRG.174004	Nitab4.5_0003284g0010	0.9044	Spermidine/spermine synthases family, Putrescine N-methyltransferase	nicotine biosynthesis	Yes
MSTRG.174004	Nitab4.5_0003284g0040	0.8919	Spermidine/spermine synthases family, Putrescine N-methyltransferase	nicotine biosynthesis	Yes
MSTRG.174004	Nitab4.5_0006307g0010	0.8757	CO dehydrogenase flavoprotein-like, FAD-binding, subdomain 2, FAD-binding, type 2, FAD-binding, type 2, subdomain 1, FAD linked oxidase, N-terminal, Berberine/berberine-like	nicotine biosynthesis	Yes
MSTRG.174004	Nitab4.5_0011232g0010	0.8927	Spermidine/spermine synthases family, Putrescine N-methyltransferase	nicotine biosynthesis	Yes
MSTRG.174004	Nitab4.5_0015055g0010	0.8667	DNA-binding domain, AP2/ERF domain	nicotine biosynthesis	Yes
MSTRG.175305	Nitab4.5_0001029g0080	0.9019	CO dehydrogenase flavoprotein-like, FAD-binding, subdomain 2, FAD linked oxidase, N-terminal, FAD-binding, type 2, subdomain 1, FAD-binding, type 2	nicotine biosynthesis	Yes
MSTRG.175604	Nitab4.5_0000013g0380	0.8858	Spermidine/spermine synthases family	nicotine biosynthesis
MSTRG.175604	Nitab4.5_0000013g0390	0.9456	Spermidine/spermine synthases family	nicotine biosynthesis
MSTRG.175604	Nitab4.5_0000025g0290	0.8847	Copper amine oxidase, C-terminal, Copper amine oxidase, N2-terminal, Copper amine oxidase, N3-terminal, Copper amine oxidase, N-terminal, Copper amine oxidase, N2/N3-terminal, Copper amine oxidase	nicotine biosynthesis
MSTRG.175604	Nitab4.5_0003090g0030	0.8645	AP2/ERF domain, DNA-binding domain	nicotine biosynthesis
MSTRG.175604	Nitab4.5_0003284g0010	0.9183	Spermidine/spermine synthases family, Putrescine N-methyltransferase	nicotine biosynthesis
MSTRG.175604	Nitab4.5_0003284g0040	0.8872	Spermidine/spermine synthases family, Putrescine N-methyltransferase	nicotine biosynthesis
MSTRG.175610	Nitab4.5_0000316g0090	0.8635	CO dehydrogenase flavoprotein-like, FAD-binding, subdomain 2, FAD-binding, type 2, Berberine/berberine-like, FAD-binding, type 2, subdomain 1, FAD linked oxidase, N-terminal	nicotine biosynthesis
MSTRG.175929	Nitab4.5_0000013g0390	0.8517	Spermidine/spermine synthases family	nicotine biosynthesis
MSTRG.176256	Nitab4.5_0000013g0380	0.8911	Spermidine/spermine synthases family	nicotine biosynthesis	Yes
MSTRG.176256	Nitab4.5_0000013g0390	0.9145	Spermidine/spermine synthases family	nicotine biosynthesis
MSTRG.176256	Nitab4.5_0000025g0290	0.894	Copper amine oxidase, C-terminal, Copper amine oxidase, N2-terminal, Copper amine oxidase, N3-terminal, Copper amine oxidase, N-terminal, Copper amine oxidase, N2/N3-terminal, Copper amine oxidase	nicotine biosynthesis	Yes
MSTRG.176256	Nitab4.5_0002338g0020	0.8508	FAD binding domain, L-aspartate oxidase, Fumarate reductase/succinate dehydrogenase flavoprotein-like, C-terminal, Succinate dehydrogenase/fumarate reductase flavoprotein, catalytic domain, FAD-dependent pyridine nucleotide-disulphide oxidoreductase	nicotine biosynthesis	Yes
MSTRG.176256	Nitab4.5_0003090g0030	0.8755	AP2/ERF domain, DNA-binding domain	nicotine biosynthesis	Yes
MSTRG.176256	Nitab4.5_0003284g0010	0.9036	Spermidine/spermine synthases family, Putrescine N-methyltransferase	nicotine biosynthesis	Yes
MSTRG.176256	Nitab4.5_0003284g0040	0.8778	Spermidine/spermine synthases family, Putrescine N-methyltransferase	nicotine biosynthesis	Yes
MSTRG.176256	Nitab4.5_0005830g0010	0.855	Succinate dehydrogenase/fumarate reductase flavoprotein, catalytic domain, Fumarate reductase/succinate dehydrogenase flavoprotein-like, C-terminal, FAD binding domain, L-aspartate oxidase, FAD-dependent pyridine nucleotide-disulphide oxidoreductase	nicotine biosynthesis	Yes
MSTRG.176327	Nitab4.5_0002115g0020	0.857	S-adenosylmethionine synthetase, S-adenosylmethionine synthetase, central domain, S-adenosylmethionine synthetase superfamily, S-adenosylmethionine synthetase, C-terminal, S-adenosylmethionine synthetase, conserved site, S-adenosylmethionine synthetase, N-terminal	nicotine biosynthesis
MSTRG.176676	Nitab4.5_0000063g0120	0.8728	S-adenosylmethionine synthetase, conserved site, S-adenosylmethionine synthetase superfamily, S-adenosylmethionine synthetase, N-terminal, S-adenosylmethionine synthetase, S-adenosylmethionine synthetase, C-terminal, S-adenosylmethionine synthetase, central domain	nicotine biosynthesis	Yes
MSTRG.176676	Nitab4.5_0000063g0170	0.8802	similar to S-adenosylmethionine synthase 2	nicotine biosynthesis	Yes
MSTRG.176676	Nitab4.5_0001029g0080	0.9185	CO dehydrogenase flavoprotein-like, FAD-binding, subdomain 2, FAD linked oxidase, N-terminal, FAD-binding, type 2, subdomain 1, FAD-binding, type 2	nicotine biosynthesis	Yes
MSTRG.17686	Nitab4.5_0000003g0720	0.8535	Copper amine oxidase, N2-terminal, Copper amine oxidase, Copper amine oxidase, C-terminal, Copper amine oxidase, N-terminal, Copper amine oxidase, N2/N3-terminal, Copper amine oxidase, N3-terminal	nicotine biosynthesis
MSTRG.177052	Nitab4.5_0000013g0380	0.9154	Spermidine/spermine synthases family	nicotine biosynthesis
MSTRG.177052	Nitab4.5_0000013g0390	0.92	Spermidine/spermine synthases family	nicotine biosynthesis
MSTRG.177052	Nitab4.5_0000025g0290	0.903	Copper amine oxidase, C-terminal, Copper amine oxidase, N2-terminal, Copper amine oxidase, N3-terminal, Copper amine oxidase, N-terminal, Copper amine oxidase, N2/N3-terminal, Copper amine oxidase	nicotine biosynthesis
MSTRG.177052	Nitab4.5_0000031g0370	0.854	NAD(P)-binding domain, NmrA-like	nicotine biosynthesis
MSTRG.177052	Nitab4.5_0000884g0010	0.8538	NmrA-like, NAD(P)-binding domain	nicotine biosynthesis
MSTRG.177052	Nitab4.5_0002338g0020	0.8691	FAD binding domain, L-aspartate oxidase, Fumarate reductase/succinate dehydrogenase flavoprotein-like, C-terminal, Succinate dehydrogenase/fumarate reductase flavoprotein, catalytic domain, FAD-dependent pyridine nucleotide-disulphide oxidoreductase	nicotine biosynthesis
MSTRG.177052	Nitab4.5_0003090g0030	0.8965	AP2/ERF domain, DNA-binding domain	nicotine biosynthesis
MSTRG.177052	Nitab4.5_0003284g0010	0.9291	Spermidine/spermine synthases family, Putrescine N-methyltransferase	nicotine biosynthesis
MSTRG.177052	Nitab4.5_0003284g0040	0.9175	Spermidine/spermine synthases family, Putrescine N-methyltransferase	nicotine biosynthesis
MSTRG.177052	Nitab4.5_0005830g0010	0.8797	Succinate dehydrogenase/fumarate reductase flavoprotein, catalytic domain, Fumarate reductase/succinate dehydrogenase flavoprotein-like, C-terminal, FAD binding domain, L-aspartate oxidase, FAD-dependent pyridine nucleotide-disulphide oxidoreductase	nicotine biosynthesis
MSTRG.177052	Nitab4.5_0011232g0010	0.869	Spermidine/spermine synthases family, Putrescine N-methyltransferase	nicotine biosynthesis
MSTRG.177331	Nitab4.5_0000063g0120	0.9047	S-adenosylmethionine synthetase, conserved site, S-adenosylmethionine synthetase superfamily, S-adenosylmethionine synthetase, N-terminal, S-adenosylmethionine synthetase, S-adenosylmethionine synthetase, C-terminal, S-adenosylmethionine synthetase, central domain	nicotine biosynthesis
MSTRG.177331	Nitab4.5_0000745g0170	0.9146	S-adenosylmethionine synthetase, central domain, S-adenosylmethionine synthetase, S-adenosylmethionine synthetase, C-terminal, S-adenosylmethionine synthetase, conserved site, S-adenosylmethionine synthetase superfamily, S-adenosylmethionine synthetase, N-terminal	nicotine biosynthesis
MSTRG.177331	Nitab4.5_0001029g0080	0.8589	CO dehydrogenase flavoprotein-like, FAD-binding, subdomain 2, FAD linked oxidase, N-terminal, FAD-binding, type 2, subdomain 1, FAD-binding, type 2	nicotine biosynthesis
MSTRG.177337	Nitab4.5_0004816g0010	0.8763	Nicotinate-nucleotide pyrophosphorylase, Quinolinate phosphoribosyl transferase, C-terminal, Quinolinate phosphoribosyl transferase, N-terminal, Aldolase-type TIM barrel, Nicotinate-nucleotide pyrophosphorylase/Putative pyrophosphorylase ModD	nicotine biosynthesis
MSTRG.177496	Nitab4.5_0000031g0370	0.9407	NAD(P)-binding domain, NmrA-like	nicotine biosynthesis
MSTRG.177496	Nitab4.5_0000316g0090	0.9856	CO dehydrogenase flavoprotein-like, FAD-binding, subdomain 2, FAD-binding, type 2, Berberine/berberine-like, FAD-binding, type 2, subdomain 1, FAD linked oxidase, N-terminal	nicotine biosynthesis
MSTRG.177496	Nitab4.5_0000884g0010	0.9327	NmrA-like, NAD(P)-binding domain	nicotine biosynthesis
MSTRG.177496	Nitab4.5_0001029g0080	0.8579	CO dehydrogenase flavoprotein-like, FAD-binding, subdomain 2, FAD linked oxidase, N-terminal, FAD-binding, type 2, subdomain 1, FAD-binding, type 2	nicotine biosynthesis
MSTRG.177496	Nitab4.5_0002338g0020	0.9208	FAD binding domain, L-aspartate oxidase, Fumarate reductase/succinate dehydrogenase flavoprotein-like, C-terminal, Succinate dehydrogenase/fumarate reductase flavoprotein, catalytic domain, FAD-dependent pyridine nucleotide-disulphide oxidoreductase	nicotine biosynthesis
MSTRG.177496	Nitab4.5_0002522g0070	0.8999	Fe-S metabolism associated domain, SufE-like, Quinolinate synthetase A	nicotine biosynthesis
MSTRG.177496	Nitab4.5_0003090g0030	0.8757	AP2/ERF domain, DNA-binding domain	nicotine biosynthesis
MSTRG.177496	Nitab4.5_0005830g0010	0.8877	Succinate dehydrogenase/fumarate reductase flavoprotein, catalytic domain, Fumarate reductase/succinate dehydrogenase flavoprotein-like, C-terminal, FAD binding domain, L-aspartate oxidase, FAD-dependent pyridine nucleotide-disulphide oxidoreductase	nicotine biosynthesis
MSTRG.177496	Nitab4.5_0006307g0010	0.9392	CO dehydrogenase flavoprotein-like, FAD-binding, subdomain 2, FAD-binding, type 2, FAD-binding, type 2, subdomain 1, FAD linked oxidase, N-terminal, Berberine/berberine-like	nicotine biosynthesis
MSTRG.177496	Nitab4.5_0011232g0010	0.9202	Spermidine/spermine synthases family, Putrescine N-methyltransferase	nicotine biosynthesis
MSTRG.177496	Nitab4.5_0015055g0010	0.9506	DNA-binding domain, AP2/ERF domain	nicotine biosynthesis
MSTRG.177951	Nitab4.5_0010630g0010	0.8584	Orn/DAP/Arg decarboxylase 2, C-terminal, Orn/DAP/Arg decarboxylase 2, conserved site, Ornithine/DAP/Arg decarboxylase, Orn/DAP/Arg decarboxylase 2, pyridoxal-phosphate binding site, Orn/DAP/Arg decarboxylase 2, N-terminal, Arginine decarboxylase, Alanine racemase/group IV decarboxylase, C-terminal	nicotine biosynthesis
MSTRG.178081	Nitab4.5_0000063g0120	0.8776	S-adenosylmethionine synthetase, conserved site, S-adenosylmethionine synthetase superfamily, S-adenosylmethionine synthetase, N-terminal, S-adenosylmethionine synthetase, S-adenosylmethionine synthetase, C-terminal, S-adenosylmethionine synthetase, central domain	nicotine biosynthesis	Yes
MSTRG.178081	Nitab4.5_0000063g0170	0.8513	similar to S-adenosylmethionine synthase 2	nicotine biosynthesis	Yes
MSTRG.178081	Nitab4.5_0000745g0170	0.8828	S-adenosylmethionine synthetase, central domain, S-adenosylmethionine synthetase, S-adenosylmethionine synthetase, C-terminal, S-adenosylmethionine synthetase, conserved site, S-adenosylmethionine synthetase superfamily, S-adenosylmethionine synthetase, N-terminal	nicotine biosynthesis	Yes
MSTRG.178081	Nitab4.5_0001029g0080	0.9389	CO dehydrogenase flavoprotein-like, FAD-binding, subdomain 2, FAD linked oxidase, N-terminal, FAD-binding, type 2, subdomain 1, FAD-binding, type 2	nicotine biosynthesis	Yes
MSTRG.178138	Nitab4.5_0000745g0170	0.8579	S-adenosylmethionine synthetase, central domain, S-adenosylmethionine synthetase, S-adenosylmethionine synthetase, C-terminal, S-adenosylmethionine synthetase, conserved site, S-adenosylmethionine synthetase superfamily, S-adenosylmethionine synthetase, N-terminal	nicotine biosynthesis
MSTRG.178276	Nitab4.5_0000013g0380	0.858	Spermidine/spermine synthases family	nicotine biosynthesis
MSTRG.178276	Nitab4.5_0000013g0390	0.8771	Spermidine/spermine synthases family	nicotine biosynthesis
MSTRG.178276	Nitab4.5_0003090g0030	0.8505	AP2/ERF domain, DNA-binding domain	nicotine biosynthesis
MSTRG.178276	Nitab4.5_0003284g0010	0.8701	Spermidine/spermine synthases family, Putrescine N-methyltransferase	nicotine biosynthesis
MSTRG.178276	Nitab4.5_0003284g0040	0.8639	Spermidine/spermine synthases family, Putrescine N-methyltransferase	nicotine biosynthesis
MSTRG.178276	Nitab4.5_0005830g0010	0.8862	Succinate dehydrogenase/fumarate reductase flavoprotein, catalytic domain, Fumarate reductase/succinate dehydrogenase flavoprotein-like, C-terminal, FAD binding domain, L-aspartate oxidase, FAD-dependent pyridine nucleotide-disulphide oxidoreductase	nicotine biosynthesis
MSTRG.178364	Nitab4.5_0000003g0720	0.9229	Copper amine oxidase, N2-terminal, Copper amine oxidase, Copper amine oxidase, C-terminal, Copper amine oxidase, N-terminal, Copper amine oxidase, N2/N3-terminal, Copper amine oxidase, N3-terminal	nicotine biosynthesis
MSTRG.178467	Nitab4.5_0000013g0390	0.8715	Spermidine/spermine synthases family	nicotine biosynthesis
MSTRG.178892	Nitab4.5_0000063g0170	0.8778	similar to S-adenosylmethionine synthase 2	nicotine biosynthesis	Yes
MSTRG.1799	Nitab4.5_0000745g0170	0.8618	S-adenosylmethionine synthetase, central domain, S-adenosylmethionine synthetase, S-adenosylmethionine synthetase, C-terminal, S-adenosylmethionine synthetase, conserved site, S-adenosylmethionine synthetase superfamily, S-adenosylmethionine synthetase, N-terminal	nicotine biosynthesis
MSTRG.1799	Nitab4.5_0001965g0070	0.8556	S-adenosylmethionine decarboxylase, S-adenosylmethionine decarboxylase, conserved site, S-adenosylmethionine decarboxylase subgroup, S-adenosyl-l-methionine decarboxylase leader peptide, S-adenosylmethionine decarboxylase, core	nicotine biosynthesis
MSTRG.180392	Nitab4.5_0003524g0020	0.8567	S-adenosylmethionine synthetase superfamily, S-adenosylmethionine synthetase, S-adenosylmethionine synthetase, N-terminal, S-adenosylmethionine synthetase, conserved site, S-adenosylmethionine synthetase, central domain, S-adenosylmethionine synthetase, C-terminal	nicotine biosynthesis
MSTRG.180475	Nitab4.5_0000013g0380	0.8983	Spermidine/spermine synthases family	nicotine biosynthesis	Yes
MSTRG.180475	Nitab4.5_0000025g0290	0.8835	Copper amine oxidase, C-terminal, Copper amine oxidase, N2-terminal, Copper amine oxidase, N3-terminal, Copper amine oxidase, N-terminal, Copper amine oxidase, N2/N3-terminal, Copper amine oxidase	nicotine biosynthesis	Yes
MSTRG.180475	Nitab4.5_0000031g0370	0.9434	NAD(P)-binding domain, NmrA-like	nicotine biosynthesis	Yes
MSTRG.180475	Nitab4.5_0000316g0090	0.9553	CO dehydrogenase flavoprotein-like, FAD-binding, subdomain 2, FAD-binding, type 2, Berberine/berberine-like, FAD-binding, type 2, subdomain 1, FAD linked oxidase, N-terminal	nicotine biosynthesis	Yes
MSTRG.180475	Nitab4.5_0000745g0170	0.8914	S-adenosylmethionine synthetase, central domain, S-adenosylmethionine synthetase, S-adenosylmethionine synthetase, C-terminal, S-adenosylmethionine synthetase, conserved site, S-adenosylmethionine synthetase superfamily, S-adenosylmethionine synthetase, N-terminal	nicotine biosynthesis	Yes
MSTRG.180475	Nitab4.5_0000884g0010	0.9519	NmrA-like, NAD(P)-binding domain	nicotine biosynthesis	Yes
MSTRG.180475	Nitab4.5_0001029g0080	0.9376	CO dehydrogenase flavoprotein-like, FAD-binding, subdomain 2, FAD linked oxidase, N-terminal, FAD-binding, type 2, subdomain 1, FAD-binding, type 2	nicotine biosynthesis	Yes
MSTRG.180475	Nitab4.5_0001965g0070	0.8503	S-adenosylmethionine decarboxylase, S-adenosylmethionine decarboxylase, conserved site, S-adenosylmethionine decarboxylase subgroup, S-adenosyl-l-methionine decarboxylase leader peptide, S-adenosylmethionine decarboxylase, core	nicotine biosynthesis	Yes
MSTRG.180475	Nitab4.5_0002338g0020	0.9406	FAD binding domain, L-aspartate oxidase, Fumarate reductase/succinate dehydrogenase flavoprotein-like, C-terminal, Succinate dehydrogenase/fumarate reductase flavoprotein, catalytic domain, FAD-dependent pyridine nucleotide-disulphide oxidoreductase	nicotine biosynthesis	Yes
MSTRG.180475	Nitab4.5_0002522g0070	0.8761	Fe-S metabolism associated domain, SufE-like, Quinolinate synthetase A	nicotine biosynthesis	Yes
MSTRG.180475	Nitab4.5_0003090g0030	0.9257	AP2/ERF domain, DNA-binding domain	nicotine biosynthesis	Yes
MSTRG.180475	Nitab4.5_0003284g0010	0.8618	Spermidine/spermine synthases family, Putrescine N-methyltransferase	nicotine biosynthesis	Yes
MSTRG.180475	Nitab4.5_0003284g0040	0.8771	Spermidine/spermine synthases family, Putrescine N-methyltransferase	nicotine biosynthesis	Yes
MSTRG.180475	Nitab4.5_0005830g0010	0.8848	Succinate dehydrogenase/fumarate reductase flavoprotein, catalytic domain, Fumarate reductase/succinate dehydrogenase flavoprotein-like, C-terminal, FAD binding domain, L-aspartate oxidase, FAD-dependent pyridine nucleotide-disulphide oxidoreductase	nicotine biosynthesis	Yes
MSTRG.180475	Nitab4.5_0006307g0010	0.9497	CO dehydrogenase flavoprotein-like, FAD-binding, subdomain 2, FAD-binding, type 2, FAD-binding, type 2, subdomain 1, FAD linked oxidase, N-terminal, Berberine/berberine-like	nicotine biosynthesis	Yes
MSTRG.180475	Nitab4.5_0011232g0010	0.941	Spermidine/spermine synthases family, Putrescine N-methyltransferase	nicotine biosynthesis	Yes
MSTRG.180475	Nitab4.5_0015055g0010	0.9428	DNA-binding domain, AP2/ERF domain	nicotine biosynthesis	Yes
MSTRG.181112	Nitab4.5_0000013g0380	0.9192	Spermidine/spermine synthases family	nicotine biosynthesis
MSTRG.181112	Nitab4.5_0000025g0290	0.9202	Copper amine oxidase, C-terminal, Copper amine oxidase, N2-terminal, Copper amine oxidase, N3-terminal, Copper amine oxidase, N-terminal, Copper amine oxidase, N2/N3-terminal, Copper amine oxidase	nicotine biosynthesis
MSTRG.181112	Nitab4.5_0000031g0370	0.9655	NAD(P)-binding domain, NmrA-like	nicotine biosynthesis
MSTRG.181112	Nitab4.5_0000316g0090	0.949	CO dehydrogenase flavoprotein-like, FAD-binding, subdomain 2, FAD-binding, type 2, Berberine/berberine-like, FAD-binding, type 2, subdomain 1, FAD linked oxidase, N-terminal	nicotine biosynthesis
MSTRG.181112	Nitab4.5_0000884g0010	0.9555	NmrA-like, NAD(P)-binding domain	nicotine biosynthesis
MSTRG.181112	Nitab4.5_0002338g0020	0.9544	FAD binding domain, L-aspartate oxidase, Fumarate reductase/succinate dehydrogenase flavoprotein-like, C-terminal, Succinate dehydrogenase/fumarate reductase flavoprotein, catalytic domain, FAD-dependent pyridine nucleotide-disulphide oxidoreductase	nicotine biosynthesis
MSTRG.181112	Nitab4.5_0002522g0070	0.8858	Fe-S metabolism associated domain, SufE-like, Quinolinate synthetase A	nicotine biosynthesis
MSTRG.181112	Nitab4.5_0003090g0030	0.9276	AP2/ERF domain, DNA-binding domain	nicotine biosynthesis
MSTRG.181112	Nitab4.5_0003284g0010	0.8797	Spermidine/spermine synthases family, Putrescine N-methyltransferase	nicotine biosynthesis
MSTRG.181112	Nitab4.5_0003284g0040	0.9072	Spermidine/spermine synthases family, Putrescine N-methyltransferase	nicotine biosynthesis
MSTRG.181112	Nitab4.5_0005830g0010	0.9432	Succinate dehydrogenase/fumarate reductase flavoprotein, catalytic domain, Fumarate reductase/succinate dehydrogenase flavoprotein-like, C-terminal, FAD binding domain, L-aspartate oxidase, FAD-dependent pyridine nucleotide-disulphide oxidoreductase	nicotine biosynthesis
MSTRG.181112	Nitab4.5_0006307g0010	0.9495	CO dehydrogenase flavoprotein-like, FAD-binding, subdomain 2, FAD-binding, type 2, FAD-binding, type 2, subdomain 1, FAD linked oxidase, N-terminal, Berberine/berberine-like	nicotine biosynthesis
MSTRG.181112	Nitab4.5_0011232g0010	0.9543	Spermidine/spermine synthases family, Putrescine N-methyltransferase	nicotine biosynthesis
MSTRG.181112	Nitab4.5_0015055g0010	0.9694	DNA-binding domain, AP2/ERF domain	nicotine biosynthesis
MSTRG.181724	Nitab4.5_0000063g0170	0.924	similar to S-adenosylmethionine synthase 2	nicotine biosynthesis	Yes
MSTRG.18191	Nitab4.5_0000003g0720	0.8932	Copper amine oxidase, N2-terminal, Copper amine oxidase, Copper amine oxidase, C-terminal, Copper amine oxidase, N-terminal, Copper amine oxidase, N2/N3-terminal, Copper amine oxidase, N3-terminal	nicotine biosynthesis
MSTRG.181992	Nitab4.5_0004816g0010	0.9438	Nicotinate-nucleotide pyrophosphorylase, Quinolinate phosphoribosyl transferase, C-terminal, Quinolinate phosphoribosyl transferase, N-terminal, Aldolase-type TIM barrel, Nicotinate-nucleotide pyrophosphorylase/Putative pyrophosphorylase ModD	nicotine biosynthesis
MSTRG.182913	Nitab4.5_0000013g0380	0.9338	Spermidine/spermine synthases family	nicotine biosynthesis
MSTRG.182913	Nitab4.5_0000013g0390	0.8741	Spermidine/spermine synthases family	nicotine biosynthesis
MSTRG.182913	Nitab4.5_0000025g0290	0.9225	Copper amine oxidase, C-terminal, Copper amine oxidase, N2-terminal, Copper amine oxidase, N3-terminal, Copper amine oxidase, N-terminal, Copper amine oxidase, N2/N3-terminal, Copper amine oxidase	nicotine biosynthesis
MSTRG.182913	Nitab4.5_0000031g0370	0.9673	NAD(P)-binding domain, NmrA-like	nicotine biosynthesis
MSTRG.182913	Nitab4.5_0000316g0090	0.9594	CO dehydrogenase flavoprotein-like, FAD-binding, subdomain 2, FAD-binding, type 2, Berberine/berberine-like, FAD-binding, type 2, subdomain 1, FAD linked oxidase, N-terminal	nicotine biosynthesis
MSTRG.182913	Nitab4.5_0000884g0010	0.9736	NmrA-like, NAD(P)-binding domain	nicotine biosynthesis
MSTRG.182913	Nitab4.5_0001029g0080	0.905	CO dehydrogenase flavoprotein-like, FAD-binding, subdomain 2, FAD linked oxidase, N-terminal, FAD-binding, type 2, subdomain 1, FAD-binding, type 2	nicotine biosynthesis
MSTRG.182913	Nitab4.5_0002338g0020	0.9658	FAD binding domain, L-aspartate oxidase, Fumarate reductase/succinate dehydrogenase flavoprotein-like, C-terminal, Succinate dehydrogenase/fumarate reductase flavoprotein, catalytic domain, FAD-dependent pyridine nucleotide-disulphide oxidoreductase	nicotine biosynthesis
MSTRG.182913	Nitab4.5_0002522g0070	0.8816	Fe-S metabolism associated domain, SufE-like, Quinolinate synthetase A	nicotine biosynthesis
MSTRG.182913	Nitab4.5_0003090g0030	0.9552	AP2/ERF domain, DNA-binding domain	nicotine biosynthesis
MSTRG.182913	Nitab4.5_0003284g0010	0.9023	Spermidine/spermine synthases family, Putrescine N-methyltransferase	nicotine biosynthesis
MSTRG.182913	Nitab4.5_0003284g0040	0.915	Spermidine/spermine synthases family, Putrescine N-methyltransferase	nicotine biosynthesis
MSTRG.182913	Nitab4.5_0005830g0010	0.918	Succinate dehydrogenase/fumarate reductase flavoprotein, catalytic domain, Fumarate reductase/succinate dehydrogenase flavoprotein-like, C-terminal, FAD binding domain, L-aspartate oxidase, FAD-dependent pyridine nucleotide-disulphide oxidoreductase	nicotine biosynthesis
MSTRG.182913	Nitab4.5_0006307g0010	0.9665	CO dehydrogenase flavoprotein-like, FAD-binding, subdomain 2, FAD-binding, type 2, FAD-binding, type 2, subdomain 1, FAD linked oxidase, N-terminal, Berberine/berberine-like	nicotine biosynthesis
MSTRG.182913	Nitab4.5_0011232g0010	0.9662	Spermidine/spermine synthases family, Putrescine N-methyltransferase	nicotine biosynthesis
MSTRG.182913	Nitab4.5_0015055g0010	0.9652	DNA-binding domain, AP2/ERF domain	nicotine biosynthesis
MSTRG.183520	Nitab4.5_0000031g0370	0.86	NAD(P)-binding domain, NmrA-like	nicotine biosynthesis
MSTRG.183520	Nitab4.5_0000316g0090	0.9505	CO dehydrogenase flavoprotein-like, FAD-binding, subdomain 2, FAD-binding, type 2, Berberine/berberine-like, FAD-binding, type 2, subdomain 1, FAD linked oxidase, N-terminal	nicotine biosynthesis
MSTRG.183520	Nitab4.5_0000745g0170	0.9254	S-adenosylmethionine synthetase, central domain, S-adenosylmethionine synthetase, S-adenosylmethionine synthetase, C-terminal, S-adenosylmethionine synthetase, conserved site, S-adenosylmethionine synthetase superfamily, S-adenosylmethionine synthetase, N-terminal	nicotine biosynthesis
MSTRG.183520	Nitab4.5_0000884g0010	0.8558	NmrA-like, NAD(P)-binding domain	nicotine biosynthesis
MSTRG.183520	Nitab4.5_0001029g0080	0.9012	CO dehydrogenase flavoprotein-like, FAD-binding, subdomain 2, FAD linked oxidase, N-terminal, FAD-binding, type 2, subdomain 1, FAD-binding, type 2	nicotine biosynthesis
MSTRG.183520	Nitab4.5_0001965g0070	0.8613	S-adenosylmethionine decarboxylase, S-adenosylmethionine decarboxylase, conserved site, S-adenosylmethionine decarboxylase subgroup, S-adenosyl-l-methionine decarboxylase leader peptide, S-adenosylmethionine decarboxylase, core	nicotine biosynthesis
MSTRG.183520	Nitab4.5_0006307g0010	0.8643	CO dehydrogenase flavoprotein-like, FAD-binding, subdomain 2, FAD-binding, type 2, FAD-binding, type 2, subdomain 1, FAD linked oxidase, N-terminal, Berberine/berberine-like	nicotine biosynthesis
MSTRG.183520	Nitab4.5_0015055g0010	0.8703	DNA-binding domain, AP2/ERF domain	nicotine biosynthesis
MSTRG.18358	Nitab4.5_0000013g0380	0.9216	Spermidine/spermine synthases family	nicotine biosynthesis	Yes
MSTRG.18358	Nitab4.5_0000025g0290	0.911	Copper amine oxidase, C-terminal, Copper amine oxidase, N2-terminal, Copper amine oxidase, N3-terminal, Copper amine oxidase, N-terminal, Copper amine oxidase, N2/N3-terminal, Copper amine oxidase	nicotine biosynthesis	Yes
MSTRG.18358	Nitab4.5_0000031g0370	0.9808	NAD(P)-binding domain, NmrA-like	nicotine biosynthesis	Yes
MSTRG.18358	Nitab4.5_0000316g0090	0.9938	CO dehydrogenase flavoprotein-like, FAD-binding, subdomain 2, FAD-binding, type 2, Berberine/berberine-like, FAD-binding, type 2, subdomain 1, FAD linked oxidase, N-terminal	nicotine biosynthesis	Yes
MSTRG.18358	Nitab4.5_0000884g0010	0.9802	NmrA-like, NAD(P)-binding domain	nicotine biosynthesis	Yes
MSTRG.18358	Nitab4.5_0001029g0080	0.9035	CO dehydrogenase flavoprotein-like, FAD-binding, subdomain 2, FAD linked oxidase, N-terminal, FAD-binding, type 2, subdomain 1, FAD-binding, type 2	nicotine biosynthesis	Yes
MSTRG.18358	Nitab4.5_0002338g0020	0.9714	FAD binding domain, L-aspartate oxidase, Fumarate reductase/succinate dehydrogenase flavoprotein-like, C-terminal, Succinate dehydrogenase/fumarate reductase flavoprotein, catalytic domain, FAD-dependent pyridine nucleotide-disulphide oxidoreductase	nicotine biosynthesis	Yes
MSTRG.18358	Nitab4.5_0002522g0070	0.9198	Fe-S metabolism associated domain, SufE-like, Quinolinate synthetase A	nicotine biosynthesis	Yes
MSTRG.18358	Nitab4.5_0003090g0030	0.9453	AP2/ERF domain, DNA-binding domain	nicotine biosynthesis	Yes
MSTRG.18358	Nitab4.5_0003284g0010	0.8769	Spermidine/spermine synthases family, Putrescine N-methyltransferase	nicotine biosynthesis	Yes
MSTRG.18358	Nitab4.5_0003284g0040	0.9012	Spermidine/spermine synthases family, Putrescine N-methyltransferase	nicotine biosynthesis	Yes
MSTRG.18358	Nitab4.5_0005830g0010	0.9288	Succinate dehydrogenase/fumarate reductase flavoprotein, catalytic domain, Fumarate reductase/succinate dehydrogenase flavoprotein-like, C-terminal, FAD binding domain, L-aspartate oxidase, FAD-dependent pyridine nucleotide-disulphide oxidoreductase	nicotine biosynthesis	Yes
MSTRG.18358	Nitab4.5_0006307g0010	0.9773	CO dehydrogenase flavoprotein-like, FAD-binding, subdomain 2, FAD-binding, type 2, FAD-binding, type 2, subdomain 1, FAD linked oxidase, N-terminal, Berberine/berberine-like	nicotine biosynthesis	Yes
MSTRG.18358	Nitab4.5_0011232g0010	0.9712	Spermidine/spermine synthases family, Putrescine N-methyltransferase	nicotine biosynthesis	Yes
MSTRG.18358	Nitab4.5_0015055g0010	0.983	DNA-binding domain, AP2/ERF domain	nicotine biosynthesis	Yes
MSTRG.183685	Nitab4.5_0000063g0120	0.925	S-adenosylmethionine synthetase, conserved site, S-adenosylmethionine synthetase superfamily, S-adenosylmethionine synthetase, N-terminal, S-adenosylmethionine synthetase, S-adenosylmethionine synthetase, C-terminal, S-adenosylmethionine synthetase, central domain	nicotine biosynthesis	Yes
MSTRG.183685	Nitab4.5_0000745g0170	0.947	S-adenosylmethionine synthetase, central domain, S-adenosylmethionine synthetase, S-adenosylmethionine synthetase, C-terminal, S-adenosylmethionine synthetase, conserved site, S-adenosylmethionine synthetase superfamily, S-adenosylmethionine synthetase, N-terminal	nicotine biosynthesis	Yes
MSTRG.183685	Nitab4.5_0001029g0080	0.8943	CO dehydrogenase flavoprotein-like, FAD-binding, subdomain 2, FAD linked oxidase, N-terminal, FAD-binding, type 2, subdomain 1, FAD-binding, type 2	nicotine biosynthesis	Yes
MSTRG.183685	Nitab4.5_0004665g0010	0.8659	S-adenosylmethionine synthetase, conserved site, S-adenosylmethionine synthetase, S-adenosylmethionine synthetase superfamily, S-adenosylmethionine synthetase, C-terminal, S-adenosylmethionine synthetase, central domain, S-adenosylmethionine synthetase, N-terminal	nicotine biosynthesis
MSTRG.18371	Nitab4.5_0003280g0010	0.906	Alanine racemase/group IV decarboxylase, C-terminal, Orn/DAP/Arg decarboxylase 2, N-terminal, Ornithine/DAP/Arg decarboxylase, Orn/DAP/Arg decarboxylase 2, conserved site, Orn/DAP/Arg decarboxylase 2, pyridoxal-phosphate binding site, Orn/DAP/Arg decarboxylase 2, C-terminal, Ornithine decarboxylase	nicotine biosynthesis
MSTRG.184189	Nitab4.5_0010630g0010	0.8598	Orn/DAP/Arg decarboxylase 2, C-terminal, Orn/DAP/Arg decarboxylase 2, conserved site, Ornithine/DAP/Arg decarboxylase, Orn/DAP/Arg decarboxylase 2, pyridoxal-phosphate binding site, Orn/DAP/Arg decarboxylase 2, N-terminal, Arginine decarboxylase, Alanine racemase/group IV decarboxylase, C-terminal	nicotine biosynthesis
MSTRG.184264	Nitab4.5_0004816g0010	0.9154	Nicotinate-nucleotide pyrophosphorylase, Quinolinate phosphoribosyl transferase, C-terminal, Quinolinate phosphoribosyl transferase, N-terminal, Aldolase-type TIM barrel, Nicotinate-nucleotide pyrophosphorylase/Putative pyrophosphorylase ModD	nicotine biosynthesis
MSTRG.184377	Nitab4.5_0000031g0370	0.8666	NAD(P)-binding domain, NmrA-like	nicotine biosynthesis
MSTRG.184377	Nitab4.5_0000063g0120	0.8598	S-adenosylmethionine synthetase, conserved site, S-adenosylmethionine synthetase superfamily, S-adenosylmethionine synthetase, N-terminal, S-adenosylmethionine synthetase, S-adenosylmethionine synthetase, C-terminal, S-adenosylmethionine synthetase, central domain	nicotine biosynthesis
MSTRG.184377	Nitab4.5_0000316g0090	0.9378	CO dehydrogenase flavoprotein-like, FAD-binding, subdomain 2, FAD-binding, type 2, Berberine/berberine-like, FAD-binding, type 2, subdomain 1, FAD linked oxidase, N-terminal	nicotine biosynthesis
MSTRG.184377	Nitab4.5_0000745g0170	0.9531	S-adenosylmethionine synthetase, central domain, S-adenosylmethionine synthetase, S-adenosylmethionine synthetase, C-terminal, S-adenosylmethionine synthetase, conserved site, S-adenosylmethionine synthetase superfamily, S-adenosylmethionine synthetase, N-terminal	nicotine biosynthesis
MSTRG.184377	Nitab4.5_0000884g0010	0.872	NmrA-like, NAD(P)-binding domain	nicotine biosynthesis
MSTRG.184377	Nitab4.5_0001029g0080	0.9516	CO dehydrogenase flavoprotein-like, FAD-binding, subdomain 2, FAD linked oxidase, N-terminal, FAD-binding, type 2, subdomain 1, FAD-binding, type 2	nicotine biosynthesis
MSTRG.184377	Nitab4.5_0001965g0070	0.8771	S-adenosylmethionine decarboxylase, S-adenosylmethionine decarboxylase, conserved site, S-adenosylmethionine decarboxylase subgroup, S-adenosyl-l-methionine decarboxylase leader peptide, S-adenosylmethionine decarboxylase, core	nicotine biosynthesis
MSTRG.184377	Nitab4.5_0002338g0020	0.8505	FAD binding domain, L-aspartate oxidase, Fumarate reductase/succinate dehydrogenase flavoprotein-like, C-terminal, Succinate dehydrogenase/fumarate reductase flavoprotein, catalytic domain, FAD-dependent pyridine nucleotide-disulphide oxidoreductase	nicotine biosynthesis
MSTRG.184377	Nitab4.5_0006307g0010	0.8791	CO dehydrogenase flavoprotein-like, FAD-binding, subdomain 2, FAD-binding, type 2, FAD-binding, type 2, subdomain 1, FAD linked oxidase, N-terminal, Berberine/berberine-like	nicotine biosynthesis
MSTRG.184377	Nitab4.5_0011232g0010	0.8507	Spermidine/spermine synthases family, Putrescine N-methyltransferase	nicotine biosynthesis
MSTRG.184377	Nitab4.5_0015055g0010	0.874	DNA-binding domain, AP2/ERF domain	nicotine biosynthesis
MSTRG.184850	Nitab4.5_0004816g0010	0.9302	Nicotinate-nucleotide pyrophosphorylase, Quinolinate phosphoribosyl transferase, C-terminal, Quinolinate phosphoribosyl transferase, N-terminal, Aldolase-type TIM barrel, Nicotinate-nucleotide pyrophosphorylase/Putative pyrophosphorylase ModD	nicotine biosynthesis
MSTRG.18497	Nitab4.5_0000013g0390	0.9015	Spermidine/spermine synthases family	nicotine biosynthesis
MSTRG.18497	Nitab4.5_0003284g0010	0.8734	Spermidine/spermine synthases family, Putrescine N-methyltransferase	nicotine biosynthesis
MSTRG.185596	Nitab4.5_0000316g0090	0.9391	CO dehydrogenase flavoprotein-like, FAD-binding, subdomain 2, FAD-binding, type 2, Berberine/berberine-like, FAD-binding, type 2, subdomain 1, FAD linked oxidase, N-terminal	nicotine biosynthesis
MSTRG.185596	Nitab4.5_0000745g0170	0.851	S-adenosylmethionine synthetase, central domain, S-adenosylmethionine synthetase, S-adenosylmethionine synthetase, C-terminal, S-adenosylmethionine synthetase, conserved site, S-adenosylmethionine synthetase superfamily, S-adenosylmethionine synthetase, N-terminal	nicotine biosynthesis
MSTRG.185596	Nitab4.5_0015055g0010	0.8588	DNA-binding domain, AP2/ERF domain	nicotine biosynthesis
MSTRG.185607	Nitab4.5_0000745g0170	0.8851	S-adenosylmethionine synthetase, central domain, S-adenosylmethionine synthetase, S-adenosylmethionine synthetase, C-terminal, S-adenosylmethionine synthetase, conserved site, S-adenosylmethionine synthetase superfamily, S-adenosylmethionine synthetase, N-terminal	nicotine biosynthesis	Yes
MSTRG.185607	Nitab4.5_0001965g0070	0.8794	S-adenosylmethionine decarboxylase, S-adenosylmethionine decarboxylase, conserved site, S-adenosylmethionine decarboxylase subgroup, S-adenosyl-l-methionine decarboxylase leader peptide, S-adenosylmethionine decarboxylase, core	nicotine biosynthesis	Yes
MSTRG.186029	Nitab4.5_0000155g0200	0.8672	S-adenosylmethionine synthetase superfamily, S-adenosylmethionine synthetase, conserved site, S-adenosylmethionine synthetase, S-adenosylmethionine synthetase, N-terminal, S-adenosylmethionine synthetase, central domain, S-adenosylmethionine synthetase, C-terminal	nicotine biosynthesis
MSTRG.186041	Nitab4.5_0000013g0380	0.8884	Spermidine/spermine synthases family	nicotine biosynthesis	Yes
MSTRG.186041	Nitab4.5_0000013g0390	0.8707	Spermidine/spermine synthases family	nicotine biosynthesis
MSTRG.186041	Nitab4.5_0000025g0290	0.8964	Copper amine oxidase, C-terminal, Copper amine oxidase, N2-terminal, Copper amine oxidase, N3-terminal, Copper amine oxidase, N-terminal, Copper amine oxidase, N2/N3-terminal, Copper amine oxidase	nicotine biosynthesis	Yes
MSTRG.186041	Nitab4.5_0000031g0370	0.8876	NAD(P)-binding domain, NmrA-like	nicotine biosynthesis	Yes
MSTRG.186041	Nitab4.5_0000884g0010	0.9005	NmrA-like, NAD(P)-binding domain	nicotine biosynthesis	Yes
MSTRG.186041	Nitab4.5_0001029g0080	0.8908	CO dehydrogenase flavoprotein-like, FAD-binding, subdomain 2, FAD linked oxidase, N-terminal, FAD-binding, type 2, subdomain 1, FAD-binding, type 2	nicotine biosynthesis	Yes
MSTRG.186041	Nitab4.5_0002338g0020	0.8943	FAD binding domain, L-aspartate oxidase, Fumarate reductase/succinate dehydrogenase flavoprotein-like, C-terminal, Succinate dehydrogenase/fumarate reductase flavoprotein, catalytic domain, FAD-dependent pyridine nucleotide-disulphide oxidoreductase	nicotine biosynthesis	Yes
MSTRG.186041	Nitab4.5_0003090g0030	0.9012	AP2/ERF domain, DNA-binding domain	nicotine biosynthesis	Yes
MSTRG.186041	Nitab4.5_0003284g0010	0.8745	Spermidine/spermine synthases family, Putrescine N-methyltransferase	nicotine biosynthesis	Yes
MSTRG.186041	Nitab4.5_0003284g0040	0.8707	Spermidine/spermine synthases family, Putrescine N-methyltransferase	nicotine biosynthesis	Yes
MSTRG.186041	Nitab4.5_0006307g0010	0.8819	CO dehydrogenase flavoprotein-like, FAD-binding, subdomain 2, FAD-binding, type 2, FAD-binding, type 2, subdomain 1, FAD linked oxidase, N-terminal, Berberine/berberine-like	nicotine biosynthesis	Yes
MSTRG.186041	Nitab4.5_0011232g0010	0.8944	Spermidine/spermine synthases family, Putrescine N-methyltransferase	nicotine biosynthesis	Yes
MSTRG.186041	Nitab4.5_0015055g0010	0.8787	DNA-binding domain, AP2/ERF domain	nicotine biosynthesis	Yes
MSTRG.186526	Nitab4.5_0001270g0090	0.8828	Alanine racemase/group IV decarboxylase, C-terminal, Ornithine decarboxylase, Orn/DAP/Arg decarboxylase 2, pyridoxal-phosphate binding site, Orn/DAP/Arg decarboxylase 2, N-terminal, Orn/DAP/Arg decarboxylase 2, C-terminal, Ornithine/DAP/Arg decarboxylase	nicotine biosynthesis
MSTRG.186600	Nitab4.5_0000031g0370	0.8725	NAD(P)-binding domain, NmrA-like	nicotine biosynthesis
MSTRG.186600	Nitab4.5_0000316g0090	0.9517	CO dehydrogenase flavoprotein-like, FAD-binding, subdomain 2, FAD-binding, type 2, Berberine/berberine-like, FAD-binding, type 2, subdomain 1, FAD linked oxidase, N-terminal	nicotine biosynthesis
MSTRG.186600	Nitab4.5_0000745g0170	0.9036	S-adenosylmethionine synthetase, central domain, S-adenosylmethionine synthetase, S-adenosylmethionine synthetase, C-terminal, S-adenosylmethionine synthetase, conserved site, S-adenosylmethionine synthetase superfamily, S-adenosylmethionine synthetase, N-terminal	nicotine biosynthesis
MSTRG.186600	Nitab4.5_0000884g0010	0.8691	NmrA-like, NAD(P)-binding domain	nicotine biosynthesis
MSTRG.186600	Nitab4.5_0001029g0080	0.9019	CO dehydrogenase flavoprotein-like, FAD-binding, subdomain 2, FAD linked oxidase, N-terminal, FAD-binding, type 2, subdomain 1, FAD-binding, type 2	nicotine biosynthesis
MSTRG.186600	Nitab4.5_0002338g0020	0.8529	FAD binding domain, L-aspartate oxidase, Fumarate reductase/succinate dehydrogenase flavoprotein-like, C-terminal, Succinate dehydrogenase/fumarate reductase flavoprotein, catalytic domain, FAD-dependent pyridine nucleotide-disulphide oxidoreductase	nicotine biosynthesis
MSTRG.186600	Nitab4.5_0006307g0010	0.8748	CO dehydrogenase flavoprotein-like, FAD-binding, subdomain 2, FAD-binding, type 2, FAD-binding, type 2, subdomain 1, FAD linked oxidase, N-terminal, Berberine/berberine-like	nicotine biosynthesis
MSTRG.186600	Nitab4.5_0015055g0010	0.8813	DNA-binding domain, AP2/ERF domain	nicotine biosynthesis
MSTRG.18661	Nitab4.5_0000013g0380	0.8517	Spermidine/spermine synthases family	nicotine biosynthesis	Yes
MSTRG.18661	Nitab4.5_0000031g0370	0.8589	NAD(P)-binding domain, NmrA-like	nicotine biosynthesis	Yes
MSTRG.18661	Nitab4.5_0000316g0090	0.8505	CO dehydrogenase flavoprotein-like, FAD-binding, subdomain 2, FAD-binding, type 2, Berberine/berberine-like, FAD-binding, type 2, subdomain 1, FAD linked oxidase, N-terminal	nicotine biosynthesis	Yes
MSTRG.18661	Nitab4.5_0000884g0010	0.8781	NmrA-like, NAD(P)-binding domain	nicotine biosynthesis	Yes
MSTRG.18661	Nitab4.5_0001029g0080	0.913	CO dehydrogenase flavoprotein-like, FAD-binding, subdomain 2, FAD linked oxidase, N-terminal, FAD-binding, type 2, subdomain 1, FAD-binding, type 2	nicotine biosynthesis	Yes
MSTRG.18661	Nitab4.5_0002338g0020	0.8685	FAD binding domain, L-aspartate oxidase, Fumarate reductase/succinate dehydrogenase flavoprotein-like, C-terminal, Succinate dehydrogenase/fumarate reductase flavoprotein, catalytic domain, FAD-dependent pyridine nucleotide-disulphide oxidoreductase	nicotine biosynthesis	Yes
MSTRG.18661	Nitab4.5_0003090g0030	0.874	AP2/ERF domain, DNA-binding domain	nicotine biosynthesis	Yes
MSTRG.18661	Nitab4.5_0006307g0010	0.8798	CO dehydrogenase flavoprotein-like, FAD-binding, subdomain 2, FAD-binding, type 2, FAD-binding, type 2, subdomain 1, FAD linked oxidase, N-terminal, Berberine/berberine-like	nicotine biosynthesis	Yes
MSTRG.18661	Nitab4.5_0011232g0010	0.8691	Spermidine/spermine synthases family, Putrescine N-methyltransferase	nicotine biosynthesis	Yes
MSTRG.18661	Nitab4.5_0015055g0010	0.8546	DNA-binding domain, AP2/ERF domain	nicotine biosynthesis	Yes
MSTRG.186790	Nitab4.5_0000013g0380	0.8801	Spermidine/spermine synthases family	nicotine biosynthesis	Yes
MSTRG.186790	Nitab4.5_0000025g0290	0.8685	Copper amine oxidase, C-terminal, Copper amine oxidase, N2-terminal, Copper amine oxidase, N3-terminal, Copper amine oxidase, N-terminal, Copper amine oxidase, N2/N3-terminal, Copper amine oxidase	nicotine biosynthesis	Yes
MSTRG.186790	Nitab4.5_0000031g0370	0.9554	NAD(P)-binding domain, NmrA-like	nicotine biosynthesis	Yes
MSTRG.186790	Nitab4.5_0000316g0090	0.9899	CO dehydrogenase flavoprotein-like, FAD-binding, subdomain 2, FAD-binding, type 2, Berberine/berberine-like, FAD-binding, type 2, subdomain 1, FAD linked oxidase, N-terminal	nicotine biosynthesis	Yes
MSTRG.186790	Nitab4.5_0000745g0170	0.8931	S-adenosylmethionine synthetase, central domain, S-adenosylmethionine synthetase, S-adenosylmethionine synthetase, C-terminal, S-adenosylmethionine synthetase, conserved site, S-adenosylmethionine synthetase superfamily, S-adenosylmethionine synthetase, N-terminal	nicotine biosynthesis	Yes
MSTRG.186790	Nitab4.5_0000884g0010	0.9558	NmrA-like, NAD(P)-binding domain	nicotine biosynthesis	Yes
MSTRG.186790	Nitab4.5_0001029g0080	0.9277	CO dehydrogenase flavoprotein-like, FAD-binding, subdomain 2, FAD linked oxidase, N-terminal, FAD-binding, type 2, subdomain 1, FAD-binding, type 2	nicotine biosynthesis	Yes
MSTRG.186790	Nitab4.5_0001965g0070	0.8643	S-adenosylmethionine decarboxylase, S-adenosylmethionine decarboxylase, conserved site, S-adenosylmethionine decarboxylase subgroup, S-adenosyl-l-methionine decarboxylase leader peptide, S-adenosylmethionine decarboxylase, core	nicotine biosynthesis	Yes
MSTRG.186790	Nitab4.5_0002338g0020	0.9428	FAD binding domain, L-aspartate oxidase, Fumarate reductase/succinate dehydrogenase flavoprotein-like, C-terminal, Succinate dehydrogenase/fumarate reductase flavoprotein, catalytic domain, FAD-dependent pyridine nucleotide-disulphide oxidoreductase	nicotine biosynthesis	Yes
MSTRG.186790	Nitab4.5_0002522g0070	0.8992	Fe-S metabolism associated domain, SufE-like, Quinolinate synthetase A	nicotine biosynthesis	Yes
MSTRG.186790	Nitab4.5_0003090g0030	0.9107	AP2/ERF domain, DNA-binding domain	nicotine biosynthesis	Yes
MSTRG.186790	Nitab4.5_0003284g0040	0.8563	Spermidine/spermine synthases family, Putrescine N-methyltransferase	nicotine biosynthesis	Yes
MSTRG.186790	Nitab4.5_0005830g0010	0.8901	Succinate dehydrogenase/fumarate reductase flavoprotein, catalytic domain, Fumarate reductase/succinate dehydrogenase flavoprotein-like, C-terminal, FAD binding domain, L-aspartate oxidase, FAD-dependent pyridine nucleotide-disulphide oxidoreductase	nicotine biosynthesis	Yes
MSTRG.186790	Nitab4.5_0006307g0010	0.956	CO dehydrogenase flavoprotein-like, FAD-binding, subdomain 2, FAD-binding, type 2, FAD-binding, type 2, subdomain 1, FAD linked oxidase, N-terminal, Berberine/berberine-like	nicotine biosynthesis	Yes
MSTRG.186790	Nitab4.5_0011232g0010	0.9428	Spermidine/spermine synthases family, Putrescine N-methyltransferase	nicotine biosynthesis	Yes
MSTRG.186790	Nitab4.5_0015055g0010	0.9592	DNA-binding domain, AP2/ERF domain	nicotine biosynthesis	Yes
MSTRG.186925	Nitab4.5_0000316g0090	0.8891	CO dehydrogenase flavoprotein-like, FAD-binding, subdomain 2, FAD-binding, type 2, Berberine/berberine-like, FAD-binding, type 2, subdomain 1, FAD linked oxidase, N-terminal	nicotine biosynthesis
MSTRG.187263	Nitab4.5_0000316g0090	0.9459	CO dehydrogenase flavoprotein-like, FAD-binding, subdomain 2, FAD-binding, type 2, Berberine/berberine-like, FAD-binding, type 2, subdomain 1, FAD linked oxidase, N-terminal	nicotine biosynthesis
MSTRG.187263	Nitab4.5_0000745g0170	0.9185	S-adenosylmethionine synthetase, central domain, S-adenosylmethionine synthetase, S-adenosylmethionine synthetase, C-terminal, S-adenosylmethionine synthetase, conserved site, S-adenosylmethionine synthetase superfamily, S-adenosylmethionine synthetase, N-terminal	nicotine biosynthesis
MSTRG.187263	Nitab4.5_0001029g0080	0.893	CO dehydrogenase flavoprotein-like, FAD-binding, subdomain 2, FAD linked oxidase, N-terminal, FAD-binding, type 2, subdomain 1, FAD-binding, type 2	nicotine biosynthesis
MSTRG.187263	Nitab4.5_0001965g0070	0.8619	S-adenosylmethionine decarboxylase, S-adenosylmethionine decarboxylase, conserved site, S-adenosylmethionine decarboxylase subgroup, S-adenosyl-l-methionine decarboxylase leader peptide, S-adenosylmethionine decarboxylase, core	nicotine biosynthesis
MSTRG.187263	Nitab4.5_0006307g0010	0.8538	CO dehydrogenase flavoprotein-like, FAD-binding, subdomain 2, FAD-binding, type 2, FAD-binding, type 2, subdomain 1, FAD linked oxidase, N-terminal, Berberine/berberine-like	nicotine biosynthesis
MSTRG.187263	Nitab4.5_0015055g0010	0.861	DNA-binding domain, AP2/ERF domain	nicotine biosynthesis
MSTRG.18746	Nitab4.5_0000013g0380	0.9179	Spermidine/spermine synthases family	nicotine biosynthesis	Yes
MSTRG.18746	Nitab4.5_0000013g0390	0.8889	Spermidine/spermine synthases family	nicotine biosynthesis
MSTRG.18746	Nitab4.5_0000025g0290	0.9199	Copper amine oxidase, C-terminal, Copper amine oxidase, N2-terminal, Copper amine oxidase, N3-terminal, Copper amine oxidase, N-terminal, Copper amine oxidase, N2/N3-terminal, Copper amine oxidase	nicotine biosynthesis	Yes
MSTRG.18746	Nitab4.5_0000031g0370	0.9237	NAD(P)-binding domain, NmrA-like	nicotine biosynthesis	Yes
MSTRG.18746	Nitab4.5_0000316g0090	0.8886	CO dehydrogenase flavoprotein-like, FAD-binding, subdomain 2, FAD-binding, type 2, Berberine/berberine-like, FAD-binding, type 2, subdomain 1, FAD linked oxidase, N-terminal	nicotine biosynthesis	Yes
MSTRG.18746	Nitab4.5_0000884g0010	0.935	NmrA-like, NAD(P)-binding domain	nicotine biosynthesis	Yes
MSTRG.18746	Nitab4.5_0001029g0080	0.9233	CO dehydrogenase flavoprotein-like, FAD-binding, subdomain 2, FAD linked oxidase, N-terminal, FAD-binding, type 2, subdomain 1, FAD-binding, type 2	nicotine biosynthesis	Yes
MSTRG.18746	Nitab4.5_0002338g0020	0.9303	FAD binding domain, L-aspartate oxidase, Fumarate reductase/succinate dehydrogenase flavoprotein-like, C-terminal, Succinate dehydrogenase/fumarate reductase flavoprotein, catalytic domain, FAD-dependent pyridine nucleotide-disulphide oxidoreductase	nicotine biosynthesis	Yes
MSTRG.18746	Nitab4.5_0003090g0030	0.9312	AP2/ERF domain, DNA-binding domain	nicotine biosynthesis	Yes
MSTRG.18746	Nitab4.5_0003284g0010	0.9	Spermidine/spermine synthases family, Putrescine N-methyltransferase	nicotine biosynthesis	Yes
MSTRG.18746	Nitab4.5_0003284g0040	0.9005	Spermidine/spermine synthases family, Putrescine N-methyltransferase	nicotine biosynthesis	Yes
MSTRG.18746	Nitab4.5_0005830g0010	0.8798	Succinate dehydrogenase/fumarate reductase flavoprotein, catalytic domain, Fumarate reductase/succinate dehydrogenase flavoprotein-like, C-terminal, FAD binding domain, L-aspartate oxidase, FAD-dependent pyridine nucleotide-disulphide oxidoreductase	nicotine biosynthesis	Yes
MSTRG.18746	Nitab4.5_0006307g0010	0.9184	CO dehydrogenase flavoprotein-like, FAD-binding, subdomain 2, FAD-binding, type 2, FAD-binding, type 2, subdomain 1, FAD linked oxidase, N-terminal, Berberine/berberine-like	nicotine biosynthesis	Yes
MSTRG.18746	Nitab4.5_0011232g0010	0.9291	Spermidine/spermine synthases family, Putrescine N-methyltransferase	nicotine biosynthesis	Yes
MSTRG.18746	Nitab4.5_0015055g0010	0.9155	DNA-binding domain, AP2/ERF domain	nicotine biosynthesis	Yes
MSTRG.18777	Nitab4.5_0000316g0090	0.8793	CO dehydrogenase flavoprotein-like, FAD-binding, subdomain 2, FAD-binding, type 2, Berberine/berberine-like, FAD-binding, type 2, subdomain 1, FAD linked oxidase, N-terminal	nicotine biosynthesis
MSTRG.18777	Nitab4.5_0000745g0170	0.9124	S-adenosylmethionine synthetase, central domain, S-adenosylmethionine synthetase, S-adenosylmethionine synthetase, C-terminal, S-adenosylmethionine synthetase, conserved site, S-adenosylmethionine synthetase superfamily, S-adenosylmethionine synthetase, N-terminal	nicotine biosynthesis
MSTRG.18777	Nitab4.5_0001029g0080	0.8534	CO dehydrogenase flavoprotein-like, FAD-binding, subdomain 2, FAD linked oxidase, N-terminal, FAD-binding, type 2, subdomain 1, FAD-binding, type 2	nicotine biosynthesis
MSTRG.18777	Nitab4.5_0001965g0070	0.8646	S-adenosylmethionine decarboxylase, S-adenosylmethionine decarboxylase, conserved site, S-adenosylmethionine decarboxylase subgroup, S-adenosyl-l-methionine decarboxylase leader peptide, S-adenosylmethionine decarboxylase, core	nicotine biosynthesis
MSTRG.187812	Nitab4.5_0003029g0020	0.8659	Berberine/berberine-like, CO dehydrogenase flavoprotein-like, FAD-binding, subdomain 2, FAD-binding, type 2, FAD linked oxidase, N-terminal, FAD-binding, type 2, subdomain 1	nicotine biosynthesis
MSTRG.188414	Nitab4.5_0001270g0090	0.8655	Alanine racemase/group IV decarboxylase, C-terminal, Ornithine decarboxylase, Orn/DAP/Arg decarboxylase 2, pyridoxal-phosphate binding site, Orn/DAP/Arg decarboxylase 2, N-terminal, Orn/DAP/Arg decarboxylase 2, C-terminal, Ornithine/DAP/Arg decarboxylase	nicotine biosynthesis
MSTRG.188414	Nitab4.5_0003280g0010	0.8851	Alanine racemase/group IV decarboxylase, C-terminal, Orn/DAP/Arg decarboxylase 2, N-terminal, Ornithine/DAP/Arg decarboxylase, Orn/DAP/Arg decarboxylase 2, conserved site, Orn/DAP/Arg decarboxylase 2, pyridoxal-phosphate binding site, Orn/DAP/Arg decarboxylase 2, C-terminal, Ornithine decarboxylase	nicotine biosynthesis
MSTRG.189223	Nitab4.5_0000745g0170	0.9434	S-adenosylmethionine synthetase, central domain, S-adenosylmethionine synthetase, S-adenosylmethionine synthetase, C-terminal, S-adenosylmethionine synthetase, conserved site, S-adenosylmethionine synthetase superfamily, S-adenosylmethionine synthetase, N-terminal	nicotine biosynthesis
MSTRG.189223	Nitab4.5_0001029g0080	0.857	CO dehydrogenase flavoprotein-like, FAD-binding, subdomain 2, FAD linked oxidase, N-terminal, FAD-binding, type 2, subdomain 1, FAD-binding, type 2	nicotine biosynthesis
MSTRG.189223	Nitab4.5_0004665g0010	0.8523	S-adenosylmethionine synthetase, conserved site, S-adenosylmethionine synthetase, S-adenosylmethionine synthetase superfamily, S-adenosylmethionine synthetase, C-terminal, S-adenosylmethionine synthetase, central domain, S-adenosylmethionine synthetase, N-terminal	nicotine biosynthesis
MSTRG.189356	Nitab4.5_0000063g0120	0.8944	S-adenosylmethionine synthetase, conserved site, S-adenosylmethionine synthetase superfamily, S-adenosylmethionine synthetase, N-terminal, S-adenosylmethionine synthetase, S-adenosylmethionine synthetase, C-terminal, S-adenosylmethionine synthetase, central domain	nicotine biosynthesis	Yes
MSTRG.189356	Nitab4.5_0000316g0090	0.8884	CO dehydrogenase flavoprotein-like, FAD-binding, subdomain 2, FAD-binding, type 2, Berberine/berberine-like, FAD-binding, type 2, subdomain 1, FAD linked oxidase, N-terminal	nicotine biosynthesis	Yes
MSTRG.189356	Nitab4.5_0000745g0170	0.9696	S-adenosylmethionine synthetase, central domain, S-adenosylmethionine synthetase, S-adenosylmethionine synthetase, C-terminal, S-adenosylmethionine synthetase, conserved site, S-adenosylmethionine synthetase superfamily, S-adenosylmethionine synthetase, N-terminal	nicotine biosynthesis	Yes
MSTRG.189356	Nitab4.5_0001029g0080	0.9468	CO dehydrogenase flavoprotein-like, FAD-binding, subdomain 2, FAD linked oxidase, N-terminal, FAD-binding, type 2, subdomain 1, FAD-binding, type 2	nicotine biosynthesis	Yes
MSTRG.189356	Nitab4.5_0001965g0070	0.8619	S-adenosylmethionine decarboxylase, S-adenosylmethionine decarboxylase, conserved site, S-adenosylmethionine decarboxylase subgroup, S-adenosyl-l-methionine decarboxylase leader peptide, S-adenosylmethionine decarboxylase, core	nicotine biosynthesis	Yes
MSTRG.189614	Nitab4.5_0001029g0080	0.8562	CO dehydrogenase flavoprotein-like, FAD-binding, subdomain 2, FAD linked oxidase, N-terminal, FAD-binding, type 2, subdomain 1, FAD-binding, type 2	nicotine biosynthesis	Yes
MSTRG.19020	Nitab4.5_0000003g0720	0.9531	Copper amine oxidase, N2-terminal, Copper amine oxidase, Copper amine oxidase, C-terminal, Copper amine oxidase, N-terminal, Copper amine oxidase, N2/N3-terminal, Copper amine oxidase, N3-terminal	nicotine biosynthesis
MSTRG.190758	Nitab4.5_0002115g0020	0.8725	S-adenosylmethionine synthetase, S-adenosylmethionine synthetase, central domain, S-adenosylmethionine synthetase superfamily, S-adenosylmethionine synthetase, C-terminal, S-adenosylmethionine synthetase, conserved site, S-adenosylmethionine synthetase, N-terminal	nicotine biosynthesis
MSTRG.191026	Nitab4.5_0000031g0370	0.8507	NAD(P)-binding domain, NmrA-like	nicotine biosynthesis
MSTRG.191026	Nitab4.5_0000316g0090	0.8688	CO dehydrogenase flavoprotein-like, FAD-binding, subdomain 2, FAD-binding, type 2, Berberine/berberine-like, FAD-binding, type 2, subdomain 1, FAD linked oxidase, N-terminal	nicotine biosynthesis
MSTRG.191026	Nitab4.5_0006307g0010	0.8518	CO dehydrogenase flavoprotein-like, FAD-binding, subdomain 2, FAD-binding, type 2, FAD-binding, type 2, subdomain 1, FAD linked oxidase, N-terminal, Berberine/berberine-like	nicotine biosynthesis
MSTRG.191026	Nitab4.5_0015055g0010	0.858	DNA-binding domain, AP2/ERF domain	nicotine biosynthesis
MSTRG.19105	Nitab4.5_0001965g0070	0.902	S-adenosylmethionine decarboxylase, S-adenosylmethionine decarboxylase, conserved site, S-adenosylmethionine decarboxylase subgroup, S-adenosyl-l-methionine decarboxylase leader peptide, S-adenosylmethionine decarboxylase, core	nicotine biosynthesis	Yes
MSTRG.19107	Nitab4.5_0004816g0010	0.9864	Nicotinate-nucleotide pyrophosphorylase, Quinolinate phosphoribosyl transferase, C-terminal, Quinolinate phosphoribosyl transferase, N-terminal, Aldolase-type TIM barrel, Nicotinate-nucleotide pyrophosphorylase/Putative pyrophosphorylase ModD	nicotine biosynthesis
MSTRG.19108	Nitab4.5_0000013g0380	0.9117	Spermidine/spermine synthases family	nicotine biosynthesis
MSTRG.19108	Nitab4.5_0000025g0290	0.9047	Copper amine oxidase, C-terminal, Copper amine oxidase, N2-terminal, Copper amine oxidase, N3-terminal, Copper amine oxidase, N-terminal, Copper amine oxidase, N2/N3-terminal, Copper amine oxidase	nicotine biosynthesis
MSTRG.19108	Nitab4.5_0000031g0370	0.9775	NAD(P)-binding domain, NmrA-like	nicotine biosynthesis
MSTRG.19108	Nitab4.5_0000316g0090	0.989	CO dehydrogenase flavoprotein-like, FAD-binding, subdomain 2, FAD-binding, type 2, Berberine/berberine-like, FAD-binding, type 2, subdomain 1, FAD linked oxidase, N-terminal	nicotine biosynthesis
MSTRG.19108	Nitab4.5_0000884g0010	0.9704	NmrA-like, NAD(P)-binding domain	nicotine biosynthesis
MSTRG.19108	Nitab4.5_0002338g0020	0.9639	FAD binding domain, L-aspartate oxidase, Fumarate reductase/succinate dehydrogenase flavoprotein-like, C-terminal, Succinate dehydrogenase/fumarate reductase flavoprotein, catalytic domain, FAD-dependent pyridine nucleotide-disulphide oxidoreductase	nicotine biosynthesis
MSTRG.19108	Nitab4.5_0002522g0070	0.922	Fe-S metabolism associated domain, SufE-like, Quinolinate synthetase A	nicotine biosynthesis
MSTRG.19108	Nitab4.5_0003090g0030	0.9314	AP2/ERF domain, DNA-binding domain	nicotine biosynthesis
MSTRG.19108	Nitab4.5_0003284g0010	0.8632	Spermidine/spermine synthases family, Putrescine N-methyltransferase	nicotine biosynthesis
MSTRG.19108	Nitab4.5_0003284g0040	0.8929	Spermidine/spermine synthases family, Putrescine N-methyltransferase	nicotine biosynthesis
MSTRG.19108	Nitab4.5_0005830g0010	0.9327	Succinate dehydrogenase/fumarate reductase flavoprotein, catalytic domain, Fumarate reductase/succinate dehydrogenase flavoprotein-like, C-terminal, FAD binding domain, L-aspartate oxidase, FAD-dependent pyridine nucleotide-disulphide oxidoreductase	nicotine biosynthesis
MSTRG.19108	Nitab4.5_0006307g0010	0.9674	CO dehydrogenase flavoprotein-like, FAD-binding, subdomain 2, FAD-binding, type 2, FAD-binding, type 2, subdomain 1, FAD linked oxidase, N-terminal, Berberine/berberine-like	nicotine biosynthesis
MSTRG.19108	Nitab4.5_0011232g0010	0.9634	Spermidine/spermine synthases family, Putrescine N-methyltransferase	nicotine biosynthesis
MSTRG.19108	Nitab4.5_0015055g0010	0.9814	DNA-binding domain, AP2/ERF domain	nicotine biosynthesis
MSTRG.191303	Nitab4.5_0000003g0720	0.9173	Copper amine oxidase, N2-terminal, Copper amine oxidase, Copper amine oxidase, C-terminal, Copper amine oxidase, N-terminal, Copper amine oxidase, N2/N3-terminal, Copper amine oxidase, N3-terminal	nicotine biosynthesis
MSTRG.191372	Nitab4.5_0000013g0380	0.9721	Spermidine/spermine synthases family	nicotine biosynthesis	Yes
MSTRG.191372	Nitab4.5_0000013g0390	0.8964	Spermidine/spermine synthases family	nicotine biosynthesis
MSTRG.191372	Nitab4.5_0000025g0290	0.9693	Copper amine oxidase, C-terminal, Copper amine oxidase, N2-terminal, Copper amine oxidase, N3-terminal, Copper amine oxidase, N-terminal, Copper amine oxidase, N2/N3-terminal, Copper amine oxidase	nicotine biosynthesis	Yes
MSTRG.191372	Nitab4.5_0000031g0370	0.9967	NAD(P)-binding domain, NmrA-like	nicotine biosynthesis	Yes
MSTRG.191372	Nitab4.5_0000316g0090	0.9633	CO dehydrogenase flavoprotein-like, FAD-binding, subdomain 2, FAD-binding, type 2, Berberine/berberine-like, FAD-binding, type 2, subdomain 1, FAD linked oxidase, N-terminal	nicotine biosynthesis	Yes
MSTRG.191372	Nitab4.5_0000884g0010	0.9937	NmrA-like, NAD(P)-binding domain	nicotine biosynthesis	Yes
MSTRG.191372	Nitab4.5_0002338g0020	0.9937	FAD binding domain, L-aspartate oxidase, Fumarate reductase/succinate dehydrogenase flavoprotein-like, C-terminal, Succinate dehydrogenase/fumarate reductase flavoprotein, catalytic domain, FAD-dependent pyridine nucleotide-disulphide oxidoreductase	nicotine biosynthesis	Yes
MSTRG.191372	Nitab4.5_0002522g0070	0.9167	Fe-S metabolism associated domain, SufE-like, Quinolinate synthetase A	nicotine biosynthesis	Yes
MSTRG.191372	Nitab4.5_0003090g0030	0.9801	AP2/ERF domain, DNA-binding domain	nicotine biosynthesis	Yes
MSTRG.191372	Nitab4.5_0003284g0010	0.9429	Spermidine/spermine synthases family, Putrescine N-methyltransferase	nicotine biosynthesis	Yes
MSTRG.191372	Nitab4.5_0003284g0040	0.9592	Spermidine/spermine synthases family, Putrescine N-methyltransferase	nicotine biosynthesis	Yes
MSTRG.191372	Nitab4.5_0005830g0010	0.9742	Succinate dehydrogenase/fumarate reductase flavoprotein, catalytic domain, Fumarate reductase/succinate dehydrogenase flavoprotein-like, C-terminal, FAD binding domain, L-aspartate oxidase, FAD-dependent pyridine nucleotide-disulphide oxidoreductase	nicotine biosynthesis	Yes
MSTRG.191372	Nitab4.5_0006307g0010	0.9827	CO dehydrogenase flavoprotein-like, FAD-binding, subdomain 2, FAD-binding, type 2, FAD-binding, type 2, subdomain 1, FAD linked oxidase, N-terminal, Berberine/berberine-like	nicotine biosynthesis	Yes
MSTRG.191372	Nitab4.5_0011232g0010	0.993	Spermidine/spermine synthases family, Putrescine N-methyltransferase	nicotine biosynthesis	Yes
MSTRG.191372	Nitab4.5_0015055g0010	0.9951	DNA-binding domain, AP2/ERF domain	nicotine biosynthesis	Yes
MSTRG.191453	Nitab4.5_0000155g0200	0.8546	S-adenosylmethionine synthetase superfamily, S-adenosylmethionine synthetase, conserved site, S-adenosylmethionine synthetase, S-adenosylmethionine synthetase, N-terminal, S-adenosylmethionine synthetase, central domain, S-adenosylmethionine synthetase, C-terminal	nicotine biosynthesis
MSTRG.191543	Nitab4.5_0000031g0370	0.8552	NAD(P)-binding domain, NmrA-like	nicotine biosynthesis
MSTRG.191543	Nitab4.5_0000316g0090	0.9453	CO dehydrogenase flavoprotein-like, FAD-binding, subdomain 2, FAD-binding, type 2, Berberine/berberine-like, FAD-binding, type 2, subdomain 1, FAD linked oxidase, N-terminal	nicotine biosynthesis
MSTRG.191543	Nitab4.5_0000745g0170	0.8584	S-adenosylmethionine synthetase, central domain, S-adenosylmethionine synthetase, S-adenosylmethionine synthetase, C-terminal, S-adenosylmethionine synthetase, conserved site, S-adenosylmethionine synthetase superfamily, S-adenosylmethionine synthetase, N-terminal	nicotine biosynthesis
MSTRG.191543	Nitab4.5_0006307g0010	0.853	CO dehydrogenase flavoprotein-like, FAD-binding, subdomain 2, FAD-binding, type 2, FAD-binding, type 2, subdomain 1, FAD linked oxidase, N-terminal, Berberine/berberine-like	nicotine biosynthesis
MSTRG.191543	Nitab4.5_0015055g0010	0.8676	DNA-binding domain, AP2/ERF domain	nicotine biosynthesis
MSTRG.191559	Nitab4.5_0000113g0030	0.8512	Spermidine/spermine synthases family	nicotine biosynthesis
MSTRG.191559	Nitab4.5_0000259g0260	0.8861	S-adenosylmethionine decarboxylase, core, S-adenosyl-l-methionine decarboxylase leader peptide, S-adenosylmethionine decarboxylase, S-adenosylmethionine decarboxylase subgroup, S-adenosylmethionine decarboxylase, conserved site	nicotine biosynthesis
MSTRG.191559	Nitab4.5_0003280g0010	0.904	Alanine racemase/group IV decarboxylase, C-terminal, Orn/DAP/Arg decarboxylase 2, N-terminal, Ornithine/DAP/Arg decarboxylase, Orn/DAP/Arg decarboxylase 2, conserved site, Orn/DAP/Arg decarboxylase 2, pyridoxal-phosphate binding site, Orn/DAP/Arg decarboxylase 2, C-terminal, Ornithine decarboxylase	nicotine biosynthesis
MSTRG.191559	Nitab4.5_0010630g0010	0.8799	Orn/DAP/Arg decarboxylase 2, C-terminal, Orn/DAP/Arg decarboxylase 2, conserved site, Ornithine/DAP/Arg decarboxylase, Orn/DAP/Arg decarboxylase 2, pyridoxal-phosphate binding site, Orn/DAP/Arg decarboxylase 2, N-terminal, Arginine decarboxylase, Alanine racemase/group IV decarboxylase, C-terminal	nicotine biosynthesis
MSTRG.19201	Nitab4.5_0000013g0390	0.8909	Spermidine/spermine synthases family	nicotine biosynthesis
MSTRG.19201	Nitab4.5_0003284g0010	0.863	Spermidine/spermine synthases family, Putrescine N-methyltransferase	nicotine biosynthesis
MSTRG.19213	Nitab4.5_0000013g0380	0.8503	Spermidine/spermine synthases family	nicotine biosynthesis	Yes
MSTRG.19213	Nitab4.5_0000025g0290	0.8523	Copper amine oxidase, C-terminal, Copper amine oxidase, N2-terminal, Copper amine oxidase, N3-terminal, Copper amine oxidase, N-terminal, Copper amine oxidase, N2/N3-terminal, Copper amine oxidase	nicotine biosynthesis	Yes
MSTRG.19213	Nitab4.5_0000031g0370	0.8844	NAD(P)-binding domain, NmrA-like	nicotine biosynthesis	Yes
MSTRG.19213	Nitab4.5_0000316g0090	0.8785	CO dehydrogenase flavoprotein-like, FAD-binding, subdomain 2, FAD-binding, type 2, Berberine/berberine-like, FAD-binding, type 2, subdomain 1, FAD linked oxidase, N-terminal	nicotine biosynthesis	Yes
MSTRG.19213	Nitab4.5_0000884g0010	0.8895	NmrA-like, NAD(P)-binding domain	nicotine biosynthesis	Yes
MSTRG.19213	Nitab4.5_0001029g0080	0.897	CO dehydrogenase flavoprotein-like, FAD-binding, subdomain 2, FAD linked oxidase, N-terminal, FAD-binding, type 2, subdomain 1, FAD-binding, type 2	nicotine biosynthesis	Yes
MSTRG.19213	Nitab4.5_0002338g0020	0.8835	FAD binding domain, L-aspartate oxidase, Fumarate reductase/succinate dehydrogenase flavoprotein-like, C-terminal, Succinate dehydrogenase/fumarate reductase flavoprotein, catalytic domain, FAD-dependent pyridine nucleotide-disulphide oxidoreductase	nicotine biosynthesis	Yes
MSTRG.19213	Nitab4.5_0003090g0030	0.8676	AP2/ERF domain, DNA-binding domain	nicotine biosynthesis	Yes
MSTRG.19213	Nitab4.5_0006307g0010	0.8842	CO dehydrogenase flavoprotein-like, FAD-binding, subdomain 2, FAD-binding, type 2, FAD-binding, type 2, subdomain 1, FAD linked oxidase, N-terminal, Berberine/berberine-like	nicotine biosynthesis	Yes
MSTRG.19213	Nitab4.5_0011232g0010	0.8832	Spermidine/spermine synthases family, Putrescine N-methyltransferase	nicotine biosynthesis	Yes
MSTRG.19213	Nitab4.5_0015055g0010	0.883	DNA-binding domain, AP2/ERF domain	nicotine biosynthesis	Yes
MSTRG.193124	Nitab4.5_0004816g0010	0.8887	Nicotinate-nucleotide pyrophosphorylase, Quinolinate phosphoribosyl transferase, C-terminal, Quinolinate phosphoribosyl transferase, N-terminal, Aldolase-type TIM barrel, Nicotinate-nucleotide pyrophosphorylase/Putative pyrophosphorylase ModD	nicotine biosynthesis
MSTRG.193442	Nitab4.5_0000063g0120	0.889	S-adenosylmethionine synthetase, conserved site, S-adenosylmethionine synthetase superfamily, S-adenosylmethionine synthetase, N-terminal, S-adenosylmethionine synthetase, S-adenosylmethionine synthetase, C-terminal, S-adenosylmethionine synthetase, central domain	nicotine biosynthesis
MSTRG.193442	Nitab4.5_0000745g0170	0.9143	S-adenosylmethionine synthetase, central domain, S-adenosylmethionine synthetase, S-adenosylmethionine synthetase, C-terminal, S-adenosylmethionine synthetase, conserved site, S-adenosylmethionine synthetase superfamily, S-adenosylmethionine synthetase, N-terminal	nicotine biosynthesis
MSTRG.193442	Nitab4.5_0000895g0150	0.8657	S-adenosylmethionine synthetase superfamily, S-adenosylmethionine synthetase, conserved site, S-adenosylmethionine synthetase, central domain, S-adenosylmethionine synthetase, S-adenosylmethionine synthetase, C-terminal, S-adenosylmethionine synthetase, N-terminal	nicotine biosynthesis
MSTRG.193442	Nitab4.5_0004665g0010	0.8827	S-adenosylmethionine synthetase, conserved site, S-adenosylmethionine synthetase, S-adenosylmethionine synthetase superfamily, S-adenosylmethionine synthetase, C-terminal, S-adenosylmethionine synthetase, central domain, S-adenosylmethionine synthetase, N-terminal	nicotine biosynthesis
MSTRG.193442	Nitab4.5_0008312g0060	0.9096	S-adenosylmethionine synthetase, conserved site, S-adenosylmethionine synthetase, S-adenosylmethionine synthetase, C-terminal, S-adenosylmethionine synthetase superfamily, S-adenosylmethionine synthetase, central domain, S-adenosylmethionine synthetase, N-terminal	nicotine biosynthesis
MSTRG.193850	Nitab4.5_0000013g0380	0.9063	Spermidine/spermine synthases family	nicotine biosynthesis
MSTRG.193850	Nitab4.5_0000025g0290	0.8973	Copper amine oxidase, C-terminal, Copper amine oxidase, N2-terminal, Copper amine oxidase, N3-terminal, Copper amine oxidase, N-terminal, Copper amine oxidase, N2/N3-terminal, Copper amine oxidase	nicotine biosynthesis
MSTRG.193850	Nitab4.5_0000031g0370	0.9594	NAD(P)-binding domain, NmrA-like	nicotine biosynthesis
MSTRG.193850	Nitab4.5_0000316g0090	0.9699	CO dehydrogenase flavoprotein-like, FAD-binding, subdomain 2, FAD-binding, type 2, Berberine/berberine-like, FAD-binding, type 2, subdomain 1, FAD linked oxidase, N-terminal	nicotine biosynthesis
MSTRG.193850	Nitab4.5_0000884g0010	0.9565	NmrA-like, NAD(P)-binding domain	nicotine biosynthesis
MSTRG.193850	Nitab4.5_0002338g0020	0.9508	FAD binding domain, L-aspartate oxidase, Fumarate reductase/succinate dehydrogenase flavoprotein-like, C-terminal, Succinate dehydrogenase/fumarate reductase flavoprotein, catalytic domain, FAD-dependent pyridine nucleotide-disulphide oxidoreductase	nicotine biosynthesis
MSTRG.193850	Nitab4.5_0002522g0070	0.9174	Fe-S metabolism associated domain, SufE-like, Quinolinate synthetase A	nicotine biosynthesis
MSTRG.193850	Nitab4.5_0003090g0030	0.9232	AP2/ERF domain, DNA-binding domain	nicotine biosynthesis
MSTRG.193850	Nitab4.5_0003284g0010	0.864	Spermidine/spermine synthases family, Putrescine N-methyltransferase	nicotine biosynthesis
MSTRG.193850	Nitab4.5_0003284g0040	0.8882	Spermidine/spermine synthases family, Putrescine N-methyltransferase	nicotine biosynthesis
MSTRG.193850	Nitab4.5_0005830g0010	0.9486	Succinate dehydrogenase/fumarate reductase flavoprotein, catalytic domain, Fumarate reductase/succinate dehydrogenase flavoprotein-like, C-terminal, FAD binding domain, L-aspartate oxidase, FAD-dependent pyridine nucleotide-disulphide oxidoreductase	nicotine biosynthesis
MSTRG.193850	Nitab4.5_0006307g0010	0.9802	CO dehydrogenase flavoprotein-like, FAD-binding, subdomain 2, FAD-binding, type 2, FAD-binding, type 2, subdomain 1, FAD linked oxidase, N-terminal, Berberine/berberine-like	nicotine biosynthesis
MSTRG.193850	Nitab4.5_0011232g0010	0.9498	Spermidine/spermine synthases family, Putrescine N-methyltransferase	nicotine biosynthesis
MSTRG.193850	Nitab4.5_0015055g0010	0.972	DNA-binding domain, AP2/ERF domain	nicotine biosynthesis
MSTRG.194342	Nitab4.5_0003280g0010	0.8947	Alanine racemase/group IV decarboxylase, C-terminal, Orn/DAP/Arg decarboxylase 2, N-terminal, Ornithine/DAP/Arg decarboxylase, Orn/DAP/Arg decarboxylase 2, conserved site, Orn/DAP/Arg decarboxylase 2, pyridoxal-phosphate binding site, Orn/DAP/Arg decarboxylase 2, C-terminal, Ornithine decarboxylase	nicotine biosynthesis
MSTRG.19439	Nitab4.5_0003029g0020	0.8755	Berberine/berberine-like, CO dehydrogenase flavoprotein-like, FAD-binding, subdomain 2, FAD-binding, type 2, FAD linked oxidase, N-terminal, FAD-binding, type 2, subdomain 1	nicotine biosynthesis
MSTRG.194637	Nitab4.5_0000013g0380	0.8943	Spermidine/spermine synthases family	nicotine biosynthesis	Yes
MSTRG.194637	Nitab4.5_0000025g0290	0.8836	Copper amine oxidase, C-terminal, Copper amine oxidase, N2-terminal, Copper amine oxidase, N3-terminal, Copper amine oxidase, N-terminal, Copper amine oxidase, N2/N3-terminal, Copper amine oxidase	nicotine biosynthesis	Yes
MSTRG.194637	Nitab4.5_0000031g0370	0.9663	NAD(P)-binding domain, NmrA-like	nicotine biosynthesis	Yes
MSTRG.194637	Nitab4.5_0000316g0090	0.9943	CO dehydrogenase flavoprotein-like, FAD-binding, subdomain 2, FAD-binding, type 2, Berberine/berberine-like, FAD-binding, type 2, subdomain 1, FAD linked oxidase, N-terminal	nicotine biosynthesis	Yes
MSTRG.194637	Nitab4.5_0000745g0170	0.8714	S-adenosylmethionine synthetase, central domain, S-adenosylmethionine synthetase, S-adenosylmethionine synthetase, C-terminal, S-adenosylmethionine synthetase, conserved site, S-adenosylmethionine synthetase superfamily, S-adenosylmethionine synthetase, N-terminal	nicotine biosynthesis	Yes
MSTRG.194637	Nitab4.5_0000884g0010	0.9653	NmrA-like, NAD(P)-binding domain	nicotine biosynthesis	Yes
MSTRG.194637	Nitab4.5_0001029g0080	0.9146	CO dehydrogenase flavoprotein-like, FAD-binding, subdomain 2, FAD linked oxidase, N-terminal, FAD-binding, type 2, subdomain 1, FAD-binding, type 2	nicotine biosynthesis	Yes
MSTRG.194637	Nitab4.5_0001965g0070	0.854	S-adenosylmethionine decarboxylase, S-adenosylmethionine decarboxylase, conserved site, S-adenosylmethionine decarboxylase subgroup, S-adenosyl-l-methionine decarboxylase leader peptide, S-adenosylmethionine decarboxylase, core	nicotine biosynthesis	Yes
MSTRG.194637	Nitab4.5_0002338g0020	0.9539	FAD binding domain, L-aspartate oxidase, Fumarate reductase/succinate dehydrogenase flavoprotein-like, C-terminal, Succinate dehydrogenase/fumarate reductase flavoprotein, catalytic domain, FAD-dependent pyridine nucleotide-disulphide oxidoreductase	nicotine biosynthesis	Yes
MSTRG.194637	Nitab4.5_0002522g0070	0.9092	Fe-S metabolism associated domain, SufE-like, Quinolinate synthetase A	nicotine biosynthesis	Yes
MSTRG.194637	Nitab4.5_0003090g0030	0.9222	AP2/ERF domain, DNA-binding domain	nicotine biosynthesis	Yes
MSTRG.194637	Nitab4.5_0003284g0040	0.8717	Spermidine/spermine synthases family, Putrescine N-methyltransferase	nicotine biosynthesis	Yes
MSTRG.194637	Nitab4.5_0005830g0010	0.9059	Succinate dehydrogenase/fumarate reductase flavoprotein, catalytic domain, Fumarate reductase/succinate dehydrogenase flavoprotein-like, C-terminal, FAD binding domain, L-aspartate oxidase, FAD-dependent pyridine nucleotide-disulphide oxidoreductase	nicotine biosynthesis	Yes
MSTRG.194637	Nitab4.5_0006307g0010	0.9645	CO dehydrogenase flavoprotein-like, FAD-binding, subdomain 2, FAD-binding, type 2, FAD-binding, type 2, subdomain 1, FAD linked oxidase, N-terminal, Berberine/berberine-like	nicotine biosynthesis	Yes
MSTRG.194637	Nitab4.5_0011232g0010	0.9537	Spermidine/spermine synthases family, Putrescine N-methyltransferase	nicotine biosynthesis	Yes
MSTRG.194637	Nitab4.5_0015055g0010	0.97	DNA-binding domain, AP2/ERF domain	nicotine biosynthesis	Yes
MSTRG.194722	Nitab4.5_0001029g0080	0.8533	CO dehydrogenase flavoprotein-like, FAD-binding, subdomain 2, FAD linked oxidase, N-terminal, FAD-binding, type 2, subdomain 1, FAD-binding, type 2	nicotine biosynthesis	Yes
MSTRG.194722	Nitab4.5_0004665g0010	0.8637	S-adenosylmethionine synthetase, conserved site, S-adenosylmethionine synthetase, S-adenosylmethionine synthetase superfamily, S-adenosylmethionine synthetase, C-terminal, S-adenosylmethionine synthetase, central domain, S-adenosylmethionine synthetase, N-terminal	nicotine biosynthesis
MSTRG.194722	Nitab4.5_0008312g0060	0.8529	S-adenosylmethionine synthetase, conserved site, S-adenosylmethionine synthetase, S-adenosylmethionine synthetase, C-terminal, S-adenosylmethionine synthetase superfamily, S-adenosylmethionine synthetase, central domain, S-adenosylmethionine synthetase, N-terminal	nicotine biosynthesis
MSTRG.195514	Nitab4.5_0000013g0380	0.9222	Spermidine/spermine synthases family	nicotine biosynthesis	Yes
MSTRG.195514	Nitab4.5_0000013g0390	0.8516	Spermidine/spermine synthases family	nicotine biosynthesis
MSTRG.195514	Nitab4.5_0000025g0290	0.9202	Copper amine oxidase, C-terminal, Copper amine oxidase, N2-terminal, Copper amine oxidase, N3-terminal, Copper amine oxidase, N-terminal, Copper amine oxidase, N2/N3-terminal, Copper amine oxidase	nicotine biosynthesis	Yes
MSTRG.195514	Nitab4.5_0000031g0370	0.949	NAD(P)-binding domain, NmrA-like	nicotine biosynthesis	Yes
MSTRG.195514	Nitab4.5_0000316g0090	0.9301	CO dehydrogenase flavoprotein-like, FAD-binding, subdomain 2, FAD-binding, type 2, Berberine/berberine-like, FAD-binding, type 2, subdomain 1, FAD linked oxidase, N-terminal	nicotine biosynthesis	Yes
MSTRG.195514	Nitab4.5_0000884g0010	0.947	NmrA-like, NAD(P)-binding domain	nicotine biosynthesis	Yes
MSTRG.195514	Nitab4.5_0002338g0020	0.945	FAD binding domain, L-aspartate oxidase, Fumarate reductase/succinate dehydrogenase flavoprotein-like, C-terminal, Succinate dehydrogenase/fumarate reductase flavoprotein, catalytic domain, FAD-dependent pyridine nucleotide-disulphide oxidoreductase	nicotine biosynthesis	Yes
MSTRG.195514	Nitab4.5_0002522g0070	0.8714	Fe-S metabolism associated domain, SufE-like, Quinolinate synthetase A	nicotine biosynthesis	Yes
MSTRG.195514	Nitab4.5_0003090g0030	0.9317	AP2/ERF domain, DNA-binding domain	nicotine biosynthesis	Yes
MSTRG.195514	Nitab4.5_0003284g0010	0.8931	Spermidine/spermine synthases family, Putrescine N-methyltransferase	nicotine biosynthesis	Yes
MSTRG.195514	Nitab4.5_0003284g0040	0.9111	Spermidine/spermine synthases family, Putrescine N-methyltransferase	nicotine biosynthesis	Yes
MSTRG.195514	Nitab4.5_0005830g0010	0.929	Succinate dehydrogenase/fumarate reductase flavoprotein, catalytic domain, Fumarate reductase/succinate dehydrogenase flavoprotein-like, C-terminal, FAD binding domain, L-aspartate oxidase, FAD-dependent pyridine nucleotide-disulphide oxidoreductase	nicotine biosynthesis	Yes
MSTRG.195514	Nitab4.5_0006307g0010	0.9416	CO dehydrogenase flavoprotein-like, FAD-binding, subdomain 2, FAD-binding, type 2, FAD-binding, type 2, subdomain 1, FAD linked oxidase, N-terminal, Berberine/berberine-like	nicotine biosynthesis	Yes
MSTRG.195514	Nitab4.5_0011232g0010	0.9473	Spermidine/spermine synthases family, Putrescine N-methyltransferase	nicotine biosynthesis	Yes
MSTRG.195514	Nitab4.5_0015055g0010	0.9485	DNA-binding domain, AP2/ERF domain	nicotine biosynthesis	Yes
MSTRG.195749	Nitab4.5_0003029g0020	0.8958	Berberine/berberine-like, CO dehydrogenase flavoprotein-like, FAD-binding, subdomain 2, FAD-binding, type 2, FAD linked oxidase, N-terminal, FAD-binding, type 2, subdomain 1	nicotine biosynthesis
MSTRG.195791	Nitab4.5_0004816g0010	0.9848	Nicotinate-nucleotide pyrophosphorylase, Quinolinate phosphoribosyl transferase, C-terminal, Quinolinate phosphoribosyl transferase, N-terminal, Aldolase-type TIM barrel, Nicotinate-nucleotide pyrophosphorylase/Putative pyrophosphorylase ModD	nicotine biosynthesis
MSTRG.197769	Nitab4.5_0000745g0170	0.8758	S-adenosylmethionine synthetase, central domain, S-adenosylmethionine synthetase, S-adenosylmethionine synthetase, C-terminal, S-adenosylmethionine synthetase, conserved site, S-adenosylmethionine synthetase superfamily, S-adenosylmethionine synthetase, N-terminal	nicotine biosynthesis	Yes
MSTRG.197769	Nitab4.5_0000895g0150	0.8686	S-adenosylmethionine synthetase superfamily, S-adenosylmethionine synthetase, conserved site, S-adenosylmethionine synthetase, central domain, S-adenosylmethionine synthetase, S-adenosylmethionine synthetase, C-terminal, S-adenosylmethionine synthetase, N-terminal	nicotine biosynthesis
MSTRG.197899	Nitab4.5_0000063g0120	0.9114	S-adenosylmethionine synthetase, conserved site, S-adenosylmethionine synthetase superfamily, S-adenosylmethionine synthetase, N-terminal, S-adenosylmethionine synthetase, S-adenosylmethionine synthetase, C-terminal, S-adenosylmethionine synthetase, central domain	nicotine biosynthesis
MSTRG.197899	Nitab4.5_0000316g0090	0.8582	CO dehydrogenase flavoprotein-like, FAD-binding, subdomain 2, FAD-binding, type 2, Berberine/berberine-like, FAD-binding, type 2, subdomain 1, FAD linked oxidase, N-terminal	nicotine biosynthesis
MSTRG.197899	Nitab4.5_0000745g0170	0.9635	S-adenosylmethionine synthetase, central domain, S-adenosylmethionine synthetase, S-adenosylmethionine synthetase, C-terminal, S-adenosylmethionine synthetase, conserved site, S-adenosylmethionine synthetase superfamily, S-adenosylmethionine synthetase, N-terminal	nicotine biosynthesis
MSTRG.197899	Nitab4.5_0001029g0080	0.9517	CO dehydrogenase flavoprotein-like, FAD-binding, subdomain 2, FAD linked oxidase, N-terminal, FAD-binding, type 2, subdomain 1, FAD-binding, type 2	nicotine biosynthesis
MSTRG.197899	Nitab4.5_0001965g0070	0.8637	S-adenosylmethionine decarboxylase, S-adenosylmethionine decarboxylase, conserved site, S-adenosylmethionine decarboxylase subgroup, S-adenosyl-l-methionine decarboxylase leader peptide, S-adenosylmethionine decarboxylase, core	nicotine biosynthesis
MSTRG.197899	Nitab4.5_0004665g0010	0.8859	S-adenosylmethionine synthetase, conserved site, S-adenosylmethionine synthetase, S-adenosylmethionine synthetase superfamily, S-adenosylmethionine synthetase, C-terminal, S-adenosylmethionine synthetase, central domain, S-adenosylmethionine synthetase, N-terminal	nicotine biosynthesis
MSTRG.197987	Nitab4.5_0000034g0230	0.8644	Spermidine/spermine synthases family	nicotine biosynthesis
MSTRG.197987	Nitab4.5_0003646g0010	0.8568	Spermidine/spermine synthases family	nicotine biosynthesis
MSTRG.197988	Nitab4.5_0000034g0230	0.8644	Spermidine/spermine synthases family	nicotine biosynthesis
MSTRG.197988	Nitab4.5_0003646g0010	0.8568	Spermidine/spermine synthases family	nicotine biosynthesis
MSTRG.198004	Nitab4.5_0000003g0720	0.8533	Copper amine oxidase, N2-terminal, Copper amine oxidase, Copper amine oxidase, C-terminal, Copper amine oxidase, N-terminal, Copper amine oxidase, N2/N3-terminal, Copper amine oxidase, N3-terminal	nicotine biosynthesis
MSTRG.198038	Nitab4.5_0004816g0010	0.8547	Nicotinate-nucleotide pyrophosphorylase, Quinolinate phosphoribosyl transferase, C-terminal, Quinolinate phosphoribosyl transferase, N-terminal, Aldolase-type TIM barrel, Nicotinate-nucleotide pyrophosphorylase/Putative pyrophosphorylase ModD	nicotine biosynthesis
MSTRG.198845	Nitab4.5_0000031g0370	0.8578	NAD(P)-binding domain, NmrA-like	nicotine biosynthesis	Yes
MSTRG.198845	Nitab4.5_0000063g0120	0.8951	S-adenosylmethionine synthetase, conserved site, S-adenosylmethionine synthetase superfamily, S-adenosylmethionine synthetase, N-terminal, S-adenosylmethionine synthetase, S-adenosylmethionine synthetase, C-terminal, S-adenosylmethionine synthetase, central domain	nicotine biosynthesis	Yes
MSTRG.198845	Nitab4.5_0000316g0090	0.9218	CO dehydrogenase flavoprotein-like, FAD-binding, subdomain 2, FAD-binding, type 2, Berberine/berberine-like, FAD-binding, type 2, subdomain 1, FAD linked oxidase, N-terminal	nicotine biosynthesis	Yes
MSTRG.198845	Nitab4.5_0000745g0170	0.9577	S-adenosylmethionine synthetase, central domain, S-adenosylmethionine synthetase, S-adenosylmethionine synthetase, C-terminal, S-adenosylmethionine synthetase, conserved site, S-adenosylmethionine synthetase superfamily, S-adenosylmethionine synthetase, N-terminal	nicotine biosynthesis	Yes
MSTRG.198845	Nitab4.5_0000884g0010	0.8664	NmrA-like, NAD(P)-binding domain	nicotine biosynthesis	Yes
MSTRG.198845	Nitab4.5_0001029g0080	0.9747	CO dehydrogenase flavoprotein-like, FAD-binding, subdomain 2, FAD linked oxidase, N-terminal, FAD-binding, type 2, subdomain 1, FAD-binding, type 2	nicotine biosynthesis	Yes
MSTRG.198845	Nitab4.5_0001965g0070	0.862	S-adenosylmethionine decarboxylase, S-adenosylmethionine decarboxylase, conserved site, S-adenosylmethionine decarboxylase subgroup, S-adenosyl-l-methionine decarboxylase leader peptide, S-adenosylmethionine decarboxylase, core	nicotine biosynthesis	Yes
MSTRG.198845	Nitab4.5_0006307g0010	0.8717	CO dehydrogenase flavoprotein-like, FAD-binding, subdomain 2, FAD-binding, type 2, FAD-binding, type 2, subdomain 1, FAD linked oxidase, N-terminal, Berberine/berberine-like	nicotine biosynthesis	Yes
MSTRG.198845	Nitab4.5_0015055g0010	0.8625	DNA-binding domain, AP2/ERF domain	nicotine biosynthesis	Yes
MSTRG.198855	Nitab4.5_0000013g0380	0.9469	Spermidine/spermine synthases family	nicotine biosynthesis
MSTRG.198855	Nitab4.5_0000013g0390	0.969	Spermidine/spermine synthases family	nicotine biosynthesis
MSTRG.198855	Nitab4.5_0000025g0290	0.941	Copper amine oxidase, C-terminal, Copper amine oxidase, N2-terminal, Copper amine oxidase, N3-terminal, Copper amine oxidase, N-terminal, Copper amine oxidase, N2/N3-terminal, Copper amine oxidase	nicotine biosynthesis
MSTRG.198855	Nitab4.5_0000031g0370	0.866	NAD(P)-binding domain, NmrA-like	nicotine biosynthesis
MSTRG.198855	Nitab4.5_0000884g0010	0.8693	NmrA-like, NAD(P)-binding domain	nicotine biosynthesis
MSTRG.198855	Nitab4.5_0002338g0020	0.8881	FAD binding domain, L-aspartate oxidase, Fumarate reductase/succinate dehydrogenase flavoprotein-like, C-terminal, Succinate dehydrogenase/fumarate reductase flavoprotein, catalytic domain, FAD-dependent pyridine nucleotide-disulphide oxidoreductase	nicotine biosynthesis
MSTRG.198855	Nitab4.5_0003090g0030	0.9212	AP2/ERF domain, DNA-binding domain	nicotine biosynthesis
MSTRG.198855	Nitab4.5_0003284g0010	0.9699	Spermidine/spermine synthases family, Putrescine N-methyltransferase	nicotine biosynthesis
MSTRG.198855	Nitab4.5_0003284g0040	0.9535	Spermidine/spermine synthases family, Putrescine N-methyltransferase	nicotine biosynthesis
MSTRG.198855	Nitab4.5_0005830g0010	0.923	Succinate dehydrogenase/fumarate reductase flavoprotein, catalytic domain, Fumarate reductase/succinate dehydrogenase flavoprotein-like, C-terminal, FAD binding domain, L-aspartate oxidase, FAD-dependent pyridine nucleotide-disulphide oxidoreductase	nicotine biosynthesis
MSTRG.198855	Nitab4.5_0011232g0010	0.8876	Spermidine/spermine synthases family, Putrescine N-methyltransferase	nicotine biosynthesis
MSTRG.198855	Nitab4.5_0015055g0010	0.8558	DNA-binding domain, AP2/ERF domain	nicotine biosynthesis
MSTRG.199971	Nitab4.5_0004816g0010	0.9302	Nicotinate-nucleotide pyrophosphorylase, Quinolinate phosphoribosyl transferase, C-terminal, Quinolinate phosphoribosyl transferase, N-terminal, Aldolase-type TIM barrel, Nicotinate-nucleotide pyrophosphorylase/Putative pyrophosphorylase ModD	nicotine biosynthesis
MSTRG.200203	Nitab4.5_0000031g0370	0.8845	NAD(P)-binding domain, NmrA-like	nicotine biosynthesis	Yes
MSTRG.200203	Nitab4.5_0000316g0090	0.9376	CO dehydrogenase flavoprotein-like, FAD-binding, subdomain 2, FAD-binding, type 2, Berberine/berberine-like, FAD-binding, type 2, subdomain 1, FAD linked oxidase, N-terminal	nicotine biosynthesis	Yes
MSTRG.200203	Nitab4.5_0000745g0170	0.9301	S-adenosylmethionine synthetase, central domain, S-adenosylmethionine synthetase, S-adenosylmethionine synthetase, C-terminal, S-adenosylmethionine synthetase, conserved site, S-adenosylmethionine synthetase superfamily, S-adenosylmethionine synthetase, N-terminal	nicotine biosynthesis	Yes
MSTRG.200203	Nitab4.5_0000884g0010	0.8903	NmrA-like, NAD(P)-binding domain	nicotine biosynthesis	Yes
MSTRG.200203	Nitab4.5_0001029g0080	0.9553	CO dehydrogenase flavoprotein-like, FAD-binding, subdomain 2, FAD linked oxidase, N-terminal, FAD-binding, type 2, subdomain 1, FAD-binding, type 2	nicotine biosynthesis	Yes
MSTRG.200203	Nitab4.5_0001965g0070	0.86	S-adenosylmethionine decarboxylase, S-adenosylmethionine decarboxylase, conserved site, S-adenosylmethionine decarboxylase subgroup, S-adenosyl-l-methionine decarboxylase leader peptide, S-adenosylmethionine decarboxylase, core	nicotine biosynthesis	Yes
MSTRG.200203	Nitab4.5_0002338g0020	0.8737	FAD binding domain, L-aspartate oxidase, Fumarate reductase/succinate dehydrogenase flavoprotein-like, C-terminal, Succinate dehydrogenase/fumarate reductase flavoprotein, catalytic domain, FAD-dependent pyridine nucleotide-disulphide oxidoreductase	nicotine biosynthesis	Yes
MSTRG.200203	Nitab4.5_0006307g0010	0.8952	CO dehydrogenase flavoprotein-like, FAD-binding, subdomain 2, FAD-binding, type 2, FAD-binding, type 2, subdomain 1, FAD linked oxidase, N-terminal, Berberine/berberine-like	nicotine biosynthesis	Yes
MSTRG.200203	Nitab4.5_0011232g0010	0.8733	Spermidine/spermine synthases family, Putrescine N-methyltransferase	nicotine biosynthesis	Yes
MSTRG.200203	Nitab4.5_0015055g0010	0.8873	DNA-binding domain, AP2/ERF domain	nicotine biosynthesis	Yes
MSTRG.20026	Nitab4.5_0000013g0380	0.968	Spermidine/spermine synthases family	nicotine biosynthesis
MSTRG.20026	Nitab4.5_0000013g0390	0.9867	Spermidine/spermine synthases family	nicotine biosynthesis
MSTRG.20026	Nitab4.5_0000025g0290	0.9622	Copper amine oxidase, C-terminal, Copper amine oxidase, N2-terminal, Copper amine oxidase, N3-terminal, Copper amine oxidase, N-terminal, Copper amine oxidase, N2/N3-terminal, Copper amine oxidase	nicotine biosynthesis
MSTRG.20026	Nitab4.5_0000031g0370	0.8952	NAD(P)-binding domain, NmrA-like	nicotine biosynthesis
MSTRG.20026	Nitab4.5_0000884g0010	0.9	NmrA-like, NAD(P)-binding domain	nicotine biosynthesis
MSTRG.20026	Nitab4.5_0002338g0020	0.9161	FAD binding domain, L-aspartate oxidase, Fumarate reductase/succinate dehydrogenase flavoprotein-like, C-terminal, Succinate dehydrogenase/fumarate reductase flavoprotein, catalytic domain, FAD-dependent pyridine nucleotide-disulphide oxidoreductase	nicotine biosynthesis
MSTRG.20026	Nitab4.5_0003090g0030	0.9476	AP2/ERF domain, DNA-binding domain	nicotine biosynthesis
MSTRG.20026	Nitab4.5_0003284g0010	0.987	Spermidine/spermine synthases family, Putrescine N-methyltransferase	nicotine biosynthesis
MSTRG.20026	Nitab4.5_0003284g0040	0.9724	Spermidine/spermine synthases family, Putrescine N-methyltransferase	nicotine biosynthesis
MSTRG.20026	Nitab4.5_0005830g0010	0.9342	Succinate dehydrogenase/fumarate reductase flavoprotein, catalytic domain, Fumarate reductase/succinate dehydrogenase flavoprotein-like, C-terminal, FAD binding domain, L-aspartate oxidase, FAD-dependent pyridine nucleotide-disulphide oxidoreductase	nicotine biosynthesis
MSTRG.20026	Nitab4.5_0006307g0010	0.8802	CO dehydrogenase flavoprotein-like, FAD-binding, subdomain 2, FAD-binding, type 2, FAD-binding, type 2, subdomain 1, FAD linked oxidase, N-terminal, Berberine/berberine-like	nicotine biosynthesis
MSTRG.20026	Nitab4.5_0011232g0010	0.9159	Spermidine/spermine synthases family, Putrescine N-methyltransferase	nicotine biosynthesis
MSTRG.20026	Nitab4.5_0015055g0010	0.8847	DNA-binding domain, AP2/ERF domain	nicotine biosynthesis
MSTRG.201368	Nitab4.5_0003029g0020	0.8525	Berberine/berberine-like, CO dehydrogenase flavoprotein-like, FAD-binding, subdomain 2, FAD-binding, type 2, FAD linked oxidase, N-terminal, FAD-binding, type 2, subdomain 1	nicotine biosynthesis
MSTRG.202658	Nitab4.5_0004816g0010	0.9772	Nicotinate-nucleotide pyrophosphorylase, Quinolinate phosphoribosyl transferase, C-terminal, Quinolinate phosphoribosyl transferase, N-terminal, Aldolase-type TIM barrel, Nicotinate-nucleotide pyrophosphorylase/Putative pyrophosphorylase ModD	nicotine biosynthesis
MSTRG.202998	Nitab4.5_0004816g0010	0.8839	Nicotinate-nucleotide pyrophosphorylase, Quinolinate phosphoribosyl transferase, C-terminal, Quinolinate phosphoribosyl transferase, N-terminal, Aldolase-type TIM barrel, Nicotinate-nucleotide pyrophosphorylase/Putative pyrophosphorylase ModD	nicotine biosynthesis
MSTRG.203480	Nitab4.5_0001270g0090	0.8719	Alanine racemase/group IV decarboxylase, C-terminal, Ornithine decarboxylase, Orn/DAP/Arg decarboxylase 2, pyridoxal-phosphate binding site, Orn/DAP/Arg decarboxylase 2, N-terminal, Orn/DAP/Arg decarboxylase 2, C-terminal, Ornithine/DAP/Arg decarboxylase	nicotine biosynthesis
MSTRG.203549	Nitab4.5_0000013g0380	0.8717	Spermidine/spermine synthases family	nicotine biosynthesis	Yes
MSTRG.203549	Nitab4.5_0000013g0390	0.8854	Spermidine/spermine synthases family	nicotine biosynthesis
MSTRG.203549	Nitab4.5_0000025g0290	0.8847	Copper amine oxidase, C-terminal, Copper amine oxidase, N2-terminal, Copper amine oxidase, N3-terminal, Copper amine oxidase, N-terminal, Copper amine oxidase, N2/N3-terminal, Copper amine oxidase	nicotine biosynthesis	Yes
MSTRG.203549	Nitab4.5_0003090g0030	0.8753	AP2/ERF domain, DNA-binding domain	nicotine biosynthesis	Yes
MSTRG.203549	Nitab4.5_0003284g0010	0.8814	Spermidine/spermine synthases family, Putrescine N-methyltransferase	nicotine biosynthesis	Yes
MSTRG.203549	Nitab4.5_0003284g0040	0.8854	Spermidine/spermine synthases family, Putrescine N-methyltransferase	nicotine biosynthesis	Yes
MSTRG.20387	Nitab4.5_0000079g0010	0.8758	FAD-binding, type 2, CO dehydrogenase flavoprotein-like, FAD-binding, subdomain 2, FAD linked oxidase, N-terminal, Berberine/berberine-like, FAD-binding, type 2, subdomain 1	nicotine biosynthesis
MSTRG.204019	Nitab4.5_0004816g0010	0.9852	Nicotinate-nucleotide pyrophosphorylase, Quinolinate phosphoribosyl transferase, C-terminal, Quinolinate phosphoribosyl transferase, N-terminal, Aldolase-type TIM barrel, Nicotinate-nucleotide pyrophosphorylase/Putative pyrophosphorylase ModD	nicotine biosynthesis
MSTRG.204372	Nitab4.5_0000031g0370	0.8573	NAD(P)-binding domain, NmrA-like	nicotine biosynthesis	Yes
MSTRG.204372	Nitab4.5_0000316g0090	0.9002	CO dehydrogenase flavoprotein-like, FAD-binding, subdomain 2, FAD-binding, type 2, Berberine/berberine-like, FAD-binding, type 2, subdomain 1, FAD linked oxidase, N-terminal	nicotine biosynthesis	Yes
MSTRG.204372	Nitab4.5_0000884g0010	0.8588	NmrA-like, NAD(P)-binding domain	nicotine biosynthesis	Yes
MSTRG.204372	Nitab4.5_0002522g0070	0.8556	Fe-S metabolism associated domain, SufE-like, Quinolinate synthetase A	nicotine biosynthesis	Yes
MSTRG.204372	Nitab4.5_0006307g0010	0.8597	CO dehydrogenase flavoprotein-like, FAD-binding, subdomain 2, FAD-binding, type 2, FAD-binding, type 2, subdomain 1, FAD linked oxidase, N-terminal, Berberine/berberine-like	nicotine biosynthesis	Yes
MSTRG.204372	Nitab4.5_0015055g0010	0.8609	DNA-binding domain, AP2/ERF domain	nicotine biosynthesis	Yes
MSTRG.204743	Nitab4.5_0002115g0020	0.8552	S-adenosylmethionine synthetase, S-adenosylmethionine synthetase, central domain, S-adenosylmethionine synthetase superfamily, S-adenosylmethionine synthetase, C-terminal, S-adenosylmethionine synthetase, conserved site, S-adenosylmethionine synthetase, N-terminal	nicotine biosynthesis
MSTRG.204943	Nitab4.5_0003280g0010	0.8502	Alanine racemase/group IV decarboxylase, C-terminal, Orn/DAP/Arg decarboxylase 2, N-terminal, Ornithine/DAP/Arg decarboxylase, Orn/DAP/Arg decarboxylase 2, conserved site, Orn/DAP/Arg decarboxylase 2, pyridoxal-phosphate binding site, Orn/DAP/Arg decarboxylase 2, C-terminal, Ornithine decarboxylase	nicotine biosynthesis
MSTRG.206098	Nitab4.5_0000003g0720	0.8867	Copper amine oxidase, N2-terminal, Copper amine oxidase, Copper amine oxidase, C-terminal, Copper amine oxidase, N-terminal, Copper amine oxidase, N2/N3-terminal, Copper amine oxidase, N3-terminal	nicotine biosynthesis
MSTRG.207156	Nitab4.5_0004816g0010	0.9072	Nicotinate-nucleotide pyrophosphorylase, Quinolinate phosphoribosyl transferase, C-terminal, Quinolinate phosphoribosyl transferase, N-terminal, Aldolase-type TIM barrel, Nicotinate-nucleotide pyrophosphorylase/Putative pyrophosphorylase ModD	nicotine biosynthesis
MSTRG.20746	Nitab4.5_0000013g0380	0.9341	Spermidine/spermine synthases family	nicotine biosynthesis
MSTRG.20746	Nitab4.5_0000013g0390	0.932	Spermidine/spermine synthases family	nicotine biosynthesis
MSTRG.20746	Nitab4.5_0000025g0290	0.9518	Copper amine oxidase, C-terminal, Copper amine oxidase, N2-terminal, Copper amine oxidase, N3-terminal, Copper amine oxidase, N-terminal, Copper amine oxidase, N2/N3-terminal, Copper amine oxidase	nicotine biosynthesis
MSTRG.20746	Nitab4.5_0000031g0370	0.8819	NAD(P)-binding domain, NmrA-like	nicotine biosynthesis
MSTRG.20746	Nitab4.5_0000884g0010	0.886	NmrA-like, NAD(P)-binding domain	nicotine biosynthesis
MSTRG.20746	Nitab4.5_0002338g0020	0.8968	FAD binding domain, L-aspartate oxidase, Fumarate reductase/succinate dehydrogenase flavoprotein-like, C-terminal, Succinate dehydrogenase/fumarate reductase flavoprotein, catalytic domain, FAD-dependent pyridine nucleotide-disulphide oxidoreductase	nicotine biosynthesis
MSTRG.20746	Nitab4.5_0003090g0030	0.9172	AP2/ERF domain, DNA-binding domain	nicotine biosynthesis
MSTRG.20746	Nitab4.5_0003284g0010	0.9431	Spermidine/spermine synthases family, Putrescine N-methyltransferase	nicotine biosynthesis
[truncated: 3,645 more rows]
